# Supplementary material
Source: publisher site journal article supplement (https://www.dovepress.com/get_supplementary_file.php?f=467388.xlsx)
Supplement: Supplementary file 1 [file get_supplementary_file.php]

## Sheet: Figure S1
Figure S1: Images of the two datasets before and after normalisation. (A&B) Images of GSE30528 before and after normalisation. (C&D) Images of GSE142025 before and after normalisation.

## Sheet: Table S1  matrix of GSE142025
Sample_ID	GSM4217781	GSM4217782	GSM4217783	GSM4217784	GSM4217785	GSM4217786	GSM4217787	GSM4217788	GSM4217789	GSM4217790	GSM4217791	GSM4217792	GSM4217793	GSM4217794	GSM4217795	GSM4217796	GSM4217797	GSM4217798	GSM4217799	GSM4217800	GSM4217801	GSM4217808	GSM4217809	GSM4217810	GSM4217811	GSM4217812	GSM4217813	GSM4217814	GSM4217815	GSM4217816
group	Advanced_DN	Advanced_DN	Advanced_DN	Advanced_DN	Advanced_DN	Advanced_DN	Advanced_DN	Advanced_DN	Advanced_DN	Advanced_DN	Advanced_DN	Advanced_DN	Advanced_DN	Advanced_DN	Advanced_DN	Advanced_DN	Advanced_DN	Advanced_DN	Advanced_DN	Advanced_DN	Advanced_DN	Control	Control	Control	Control	Control	Control	Control	Control	Control
Symbol	A11A	A12A	A13A	A14A	A15A	A17A	A18A	A19A	A20A	A21A	A22A	A23A	A24A	A25A	A26A	A28A	A29A	A30A	A31A	A32A	A33A	N2A	N3A	N5B	N6B	N7B	N8B	N10B	N12B	N13B
A1BG	6.86682	6.94743	6.8241	7.38601	7.42834	7.16858	7.91732	7.72504	7.419	6.78592	6.94054	6.73605	7.71751	7.13395	7.73695	6.91433	6.1194	7.35598	7.24635	7.07214	6.70266	6.46984	6.20346	6.88857	5.27303	6.41722	5.99789	6.62316	6.39196	5.69762
A1BG-AS1	5.5699	6.29519	5.73857	6.51005	6.93034	4.60565	7.43671	6.69536	6.2275	5.87001	6.39155	6.60429	5.88505	6.28951	6.89512	6.03521	5.92971	6.14036	6.84524	6.31656	5.51097	5.7197	5.45624	6.20128	4.48404	5.51242	5.15948	5.97886	5.47816	4.87722
A1CF	10.9196	11.2712	12.1031	11.5254	10.5448	10.8697	9.25316	10.307	10.4875	11.2884	11.1748	11.9979	11.0563	11.3834	10.4687	10.6837	12.1415	11.386	9.70299	11.855	12.1028	12.1853	12.5097	12.1304	12.3244	12.5685	12.3536	12.3988	12.2727	12.246
A2M	16.263	16.3555	16.3246	16.4858	16.529	15.6267	16.2868	16.263	16.5824	16.1363	16.2286	16.0105	16.2868	16.7609	16.529	17.282	14.6824	16.2868	17.1514	16.2868	15.2428	15.4754	14.9976	15.376	15.1319	15.008	15.2428	15.6078	15.3489	15.0919
A2M-AS1	8.00688	7.35019	7.85532	8.05192	8.7638	7.86735	8.82003	8.47412	8.26536	7.68057	7.72289	7.93999	7.39923	8.19138	8.77804	8.36776	7.73499	7.82065	7.29386	7.69699	7.38827	7.45005	7.51413	7.28188	7.25839	7.53276	7.25783	7.75372	7.55805	7.3024
A4GALT	11.6616	11.6722	11.1061	11.1043	11.4994	11.9372	11.532	11.5199	11.2971	11.7384	11.3877	11.3006	11.1944	11.4758	11.4718	11.0694	11.4399	11.3096	12.0052	11.4763	11.5044	11.1619	11.0486	11.1696	11.2803	11.1905	11.0105	12.0994	11.4181	11.2796
A4GNT	6.69536	7.25962	6.38217	7.51152	6.29519	6.10478	6.08703	5.77059	6.30901	8.24264	7.16632	7.86782	6.03684	6.84272	7.16427	6.09884	7.33563	5.03751	8.70965	7.29283	5.83435	7.30047	5.57622	7.18537	6.24036	6.23473	8.42119	6.26107	6.39196	7.21629
AAAS	10.6657	11.0129	10.9778	10.9961	10.8704	11.1257	10.8321	11.1453	10.9317	10.7762	10.97	11.2119	11.1119	10.962	10.9355	10.8463	11.2132	10.9768	10.6389	11.1514	11.0786	11.1233	10.9005	10.988	11.0133	11.0688	11.0616	10.7393	10.8925	10.7458
AACS	10.5025	10.6589	10.4021	10.6356	10.5703	10.4527	10.4382	10.3105	10.5185	10.6972	10.6031	10.4532	10.2471	10.2247	10.6954	10.2404	10.6778	9.93158	10.9278	10.3954	10.5291	10.3804	10.6074	10.3446	10.7194	10.5688	10.5491	10.534	10.719	10.4589
AACSP1	6.30462	7.38013	7.14489	5.80822	6.0627	7.33625	6.82451	6.53579	5.86623	5.65552	5.98414	5.98414	5.7831	5.98106	6.05517	4.24879	6.26528	5.28446	6.68676	6.71551	6.12328	7.88165	7.72728	7.05364	7.45223	6.38966	6.53043	8.16559	6.07709	4.37017
AADAT	8.3194	8.4631	9.39072	7.82046	7.75372	8.15549	6.96049	7.39317	7.80504	8.36182	8.19937	8.63112	7.97832	7.78845	7.89612	8.02547	8.97704	7.84494	8.06384	8.07844	8.553	8.63789	8.52063	9.15403	8.66482	8.67354	8.5465	8.26795	8.72999	9.22774
AAED1	7.83268	8.39158	8.08068	7.95866	8.13398	8.89726	7.88355	8.44099	8.17219	8.31059	7.70389	7.92628	8.20575	8.11259	7.76626	8.18347	8.48671	8.26874	8.41074	7.96008	8.90131	8.01909	8.15247	8.2349	8.15943	8.10413	7.92768	8.14008	8.14619	8.95483
AAGAB	10.6687	10.7602	10.7066	10.5394	10.7451	11.2278	10.5683	10.6857	10.984	10.9805	10.797	10.7147	10.8522	10.5937	10.5554	10.79	11.1111	11.0299	10.9129	10.7257	11.0825	10.7596	10.8851	10.6234	10.6201	10.7431	10.8124	10.7547	10.7374	10.7083
AAK1	13.6526	13.5912	13.6339	13.3959	13.6379	13.3697	13.5912	13.6113	13.5651	13.6516	13.5927	13.6182	13.5899	13.5128	13.6072	13.7641	13.2776	13.5492	13.51	13.6261	13.4494	13.6357	13.5635	13.3316	13.4714	13.4334	13.4671	13.674	13.4482	13.6493
AAMDC	9.20238	8.91777	9.09278	8.79051	9.04847	9.66377	8.72354	9.21863	9.12773	8.71897	8.95318	8.77067	9.19279	8.80876	8.79018	9.12773	9.57085	9.36865	8.95017	8.97797	9.87114	8.92357	9.07609	8.98297	8.83511	9.19842	9.04409	8.74307	8.89259	8.91065
AAMP	11.8694	11.9773	12.0555	11.8552	11.7895	12.488	11.6605	12.1394	12.105	11.8979	11.8491	11.9932	12.0382	11.8132	11.7738	11.6092	12.5764	12.335	11.8522	11.9716	12.5542	11.997	11.9873	12.0765	12.0985	11.9674	12.0685	12.0323	12.1471	12.0625
AANAT	4.53486	5.25981	5.49726	4.97816	6.0627	4.67496	6.40067	5.69488	4.73799	5.23907	5.8754	5.50878	4.5403	6.55017	5.55064	6.12818	4.80171	5.74055	5.49652	6.29519	4.24059	5.61918	5.1799	5.04993	5.07101	5.20297	4.9903	6.33875	5.10005	5.84043
AAR2	10.5621	10.736	10.6218	10.5538	10.7808	11.1639	10.6317	10.7886	10.9813	10.7386	10.9064	10.7284	10.8251	10.6713	10.6665	10.6529	10.8856	10.6729	10.9938	10.8076	10.6976	10.5458	10.5048	10.4809	10.3978	10.6624	10.4205	10.5475	10.4801	10.3986
AARD	4.69892	6.12266	6.4944	6.33875	4.46683	6.55728	5.25981	6.4028	5.41845	4.84413	5.32096	6.60429	6.20346	6.16595	5.15042	4.56084	7.47537	6.01628	4.7429	6.26528	5.15803	5.96939	6.57573	6.16735	7.57047	6.1116	6.5011	5.49652	6.41883	6.52152
AARS	12.6943	12.8821	12.8147	12.9561	12.6648	12.81	12.4674	12.41	12.6666	12.8287	12.7998	12.8547	12.9142	12.8802	12.7742	12.5517	12.9366	12.4419	12.9298	12.9916	12.4486	12.8916	13.0703	12.9366	12.7436	12.8731	12.8139	12.8108	12.8577	12.6627
AARS2	11.054	10.9646	11.0455	10.9913	11.1714	10.5247	11.3419	11.0213	10.9373	10.9232	11.0233	11.0157	10.939	11.1495	11.1038	10.8591	10.8203	10.5986	10.7994	11.0531	10.5716	10.9464	10.9037	10.9286	10.8238	10.9343	11.1084	10.9811	11.0203	10.7047
AASDH	9.90861	9.43403	9.85151	9.75758	9.40996	9.45878	9.26978	9.41498	9.62918	9.84666	9.73702	9.92168	9.44565	9.61293	9.57141	9.76904	9.8643	9.56303	9.75849	9.67969	9.72711	10.0481	10.224	9.90974	10.0424	10.1021	9.78815	9.91832	9.74085	9.89408
AASDHPPT	9.63398	9.51212	10.2141	9.81879	9.25637	9.55811	8.8277	9.33565	9.79085	10.0778	9.92285	9.9934	9.66081	9.76	9.55196	9.61948	10.0794	9.68465	9.9027	9.46466	9.68561	10.1689	10.3881	10.1519	10.4009	10.3898	10.3478	10.1929	10.2078	10.2494
AASS	11.6564	11.6708	12.5148	11.7301	11.5264	11.2523	10.8855	11.1591	11.5551	11.6564	11.7804	12.1466	11.2818	11.6953	11.5276	11.7963	11.8758	11.8289	11.3407	11.8581	12.3795	12.4681	12.4354	12.6377	12.0675	12.1222	12.0801	12.7217	12.1767	12.7135
AATBC	7.91422	8.20121	7.99996	7.89612	8.44099	6.86682	9.19629	7.73175	7.49163	8.122	8.09303	8.0671	7.42834	8.27531	8.22319	8.27686	7.21572	6.83812	7.7993	7.95145	7.04318	8.03423	7.56133	7.78985	7.16978	7.89682	7.9574	8.14008	8.04865	7.9056
AATF	10.8484	10.9404	11.0156	11.0418	10.8758	11.3664	10.7044	11.0832	10.9317	10.9344	11.0121	11.1678	11.3109	10.8613	10.9142	10.7886	11.2572	11.1908	10.949	10.999	11.054	10.816	11.0385	11.0775	10.9617	10.9751	11.0587	10.9528	10.9708	11.0147
AATK	8.68289	9.0316	9.56126	9.35963	8.65905	6.90599	9.68595	7.75678	7.61833	8.84986	9.01322	9.64465	7.34515	8.98581	8.7265	7.91756	8.04777	7.26771	8.49622	8.51823	5.41151	9.24011	8.78673	9.61266	8.37151	8.75143	10.4925	9.77744	9.50295	10.0469
ABALON	7.32572	7.63823	7.76707	7.32314	7.48451	7.89178	7.41462	7.69699	7.25783	8.07092	7.60136	7.66928	7.5684	7.50694	7.52565	7.6892	7.72676	7.52472	7.69343	7.31953	7.94591	7.71223	7.98659	7.83195	7.72411	7.94902	7.43788	7.87733	7.27509	8.00065
ABAT	13.7664	14.0651	14.6399	13.7517	13.4089	13.2815	12.5335	12.5883	12.7412	13.8862	13.9343	14.4162	13.5702	13.805	13.49	13.2422	14.4297	13.5168	12.6397	14.254	13.963	14.4591	14.6749	14.6339	14.583	14.6062	14.6457	14.2896	14.5408	14.4204
ABCA1	13.2553	13.3747	13.2516	12.723	13.516	12.9974	13.3985	13.8521	13.6206	12.4026	13.1708	12.7982	13.4175	13.1021	13.4376	13.413	12.8124	13.0854	12.9375	13.4569	13.6493	12.4294	12.7006	12.6541	12.503	12.4318	11.8947	12.4492	11.9987	12.1266
ABCA10	9.80529	9.79596	9.79014	10.5042	10.0913	8.7194	9.98824	10.0721	10.2334	9.97832	9.81251	10.4348	9.71371	10.7348	9.87801	9.76904	9.42682	9.84438	9.6485	10.1301	10.3169	9.90514	9.91845	9.77493	9.47897	9.89408	9.55867	10.0277	9.84026	9.53445
ABCA11P	8.55522	8.55545	8.30621	8.21129	8.32156	8.18559	8.41296	8.32037	8.3496	8.21016	8.11545	8.24579	8.00383	8.16052	8.38563	8.3945	8.30875	8.30651	8.4799	8.15587	8.58435	8.39345	8.38199	7.91267	8.29203	8.34896	8.04398	8.1037	8.06951	8.16504
ABCA12	7.09986	7.54338	7.45439	7.54632	8.3149	7.57776	6.82451	6.95222	8.06163	7.36198	7.7993	6.15487	7.41994	7.32763	6.74269	8.55545	5.30369	7.2796	7.3229	7.04647	8.145	6.62108	6.57573	5.91203	7.00227	6.07805	6.56099	7.54489	6.57486	6.69678
ABCA13	9.59957	8.56599	5.32409	7.71252	7.47308	7.81878	10.3273	8.15917	8.21001	8.71077	8.70999	7.27782	8.56062	6.46882	10.0429	8.69229	6.23861	8.01832	10.4543	8.01909	6.77137	5.49084	5.623	3.57024	5.9195	4.31694	6.56099	5.92298	4.87722	4.63347
ABCA2	12.9516	12.8039	12.699	12.9383	13.1895	11.481	13.688	12.7812	12.5065	12.7177	12.9898	12.8706	11.8563	12.9507	13.1425	12.81	11.9	11.72	12.7082	13.0122	11.5291	12.9159	12.4606	12.5596	12.7978	12.7195	13.1103	12.945	12.7794	12.3403
ABCA3	11.1828	11.4282	11.0884	11.2597	11.4658	10.546	11.9106	11.15	11.0581	11.2084	11.3364	11.0837	10.8324	11.1515	11.1957	11.3981	10.3379	10.3601	11.5156	11.3757	10.222	11.0093	10.5736	10.3913	10.8512	10.8033	10.9916	11.0671	10.8106	10.4468
ABCA4	9.71529	8.40887	8.08756	8.87077	8.4351	7.47107	10.1916	7.76394	9.22468	10.121	9.46443	9.14083	7.64792	8.26363	9.26198	8.76242	8.98629	7.89991	10.2112	8.58387	7.06841	8.271	8.61461	7.89197	7.75574	8.22157	9.10378	8.06951	8.79138	7.76098
ABCA5	10.7854	10.2445	11.1017	10.8814	10.1672	9.9078	10.548	10.0505	10.4613	10.97	10.821	11.1856	10.3484	10.8428	10.2685	10.6449	10.6846	10.5375	10.037	10.5786	10.2761	11.9114	11.903	11.6982	11.7658	11.7736	11.3312	11.8673	11.5274	11.9776
ABCA6	10.7706	10.7111	10.6734	10.8694	10.7327	9.97467	10.7321	10.954	10.8858	10.552	10.1845	10.6959	10.7111	11.1776	10.6176	11.0399	9.98889	10.6822	9.96123	10.5175	11.3087	10.4658	10.2348	11.0056	9.95249	10.3559	9.58863	10.3197	10.58	9.94194
ABCA7	11.135	11.4102	10.8884	11.3125	11.6408	9.90434	12.2969	11.592	10.605	10.9967	11.1022	10.9431	10.7085	11.7163	11.676	11.108	9.28214	10.8628	11.1439	11.3589	9.56473	10.8081	10.5529	10.3378	10.6142	10.6624	10.338	10.8735	10.5703	10.7083
ABCA8	11.5192	11.7808	12.1031	12.2738	11.9298	11.2984	11.6944	11.8579	11.9954	11.787	11.1268	12.1402	11.6634	12.4267	11.726	12.1387	10.969	11.8197	11.1447	11.7888	12.0107	11.4126	11.1646	12.1179	11.2482	11.4765	10.4126	11.3163	11.2953	10.9638
ABCA9	10.1075	10.1673	10.2665	10.2336	10.2487	9.36698	10.1256	10.2146	10.1593	9.93671	9.41733	10.2945	9.97694	10.5671	9.95235	10.3944	9.35277	9.80502	9.53705	9.75419	10.5846	9.83128	9.68525	10.2846	9.0698	9.80228	8.86916	9.72893	10.035	9.42383
ABCB1	12.5222	12.4789	12.9474	12.8553	12.2811	12.3224	11.9461	12.1069	12.3591	12.5957	12.911	13.0989	12.7761	12.6916	12.6544	12.3123	12.5536	12.3162	11.8345	12.483	12.0399	12.8674	13.2331	12.8528	13.0251	13.0765	12.753	12.7428	12.8108	12.9315
ABCB10	10.1749	10.0442	10.2266	9.8963	10.106	10.0197	10.2156	9.97131	9.94855	9.92233	9.98735	10.116	10.179	10.1854	9.80063	9.89948	10.2369	10.1589	9.99138	10.2496	9.82717	10.1427	10.4947	10.2484	10.3	10.2935	10.2858	10.2057	10.352	10.0967
ABCB4	7.75574	7.00227	7.44388	7.61833	7.54771	7.82729	7.28554	8.00962	8.24258	6.4963	7.58904	8.21575	7.99822	7.79459	7.91535	7.3865	7.01629	8.29165	7.44776	7.46721	6.79186	6.89417	7.17047	8.2349	7.48305	7.0612	6.99111	7.63701	7.55805	8.19743
ABCB6	10.285	10.5901	10.6959	10.4548	10.6157	10.3909	9.9255	10.1605	10.0422	10.5428	10.4065	10.5498	10.0202	10.3706	10.2158	10.0983	10.8359	10.2306	10.3991	10.5642	10.5383	10.518	10.6184	10.3894	10.4789	10.6059	10.5183	10.4562	10.6815	10.2923
ABCB7	10.1894	10.0275	10.4301	10.1205	9.84282	10.2092	9.92853	9.88515	10.152	9.97522	10.1928	10.3387	10.2819	10.1366	9.90465	10.0816	10.5966	10.1793	10.1238	10.1601	10.0174	10.5713	10.6972	10.5291	10.6153	10.5297	10.6074	10.2961	10.398	10.4004
ABCB8	11.2535	11.4907	11.5991	11.3797	11.3669	10.8984	11.2256	11.0907	11.0479	11.511	11.2445	11.3946	10.9071	11.5115	11.1117	11.076	11.2638	10.8924	11.3445	11.6448	10.9286	11.5908	11.4021	11.4164	11.466	11.4962	11.4251	11.5096	11.6849	11.3154
ABCB9	8.84401	9.06478	8.85924	9.09437	9.184	8.51406	9.14485	8.70568	8.92752	8.75526	9.16066	9.23082	8.55049	9.19682	8.91636	8.64131	8.64131	8.71062	9.01617	9.11704	8.27709	8.85474	8.53912	8.78965	8.99104	8.93578	8.80703	9.40411	9.15872	8.73273
ABCC1	12.3795	12.5746	11.8417	12.3903	12.7063	12.0416	12.8547	12.8407	12.5097	12.2098	12.576	11.948	12.4049	12.4903	12.7682	12.5048	11.2231	12.3725	12.8314	12.1664	11.769	11.847	11.4776	11.5181	11.54	11.5339	11.6476	11.6496	11.6937	11.4962
ABCC10	11.6462	11.8239	11.3728	11.5624	11.9077	10.935	12.0763	11.5015	11.3131	11.5963	11.6556	11.5147	11.3567	11.7206	11.7573	11.5578	10.9612	10.9746	11.799	11.688	10.7642	11.3894	11.2971	11.0384	10.9193	11.2272	11.2643	11.2858	11.4454	10.7673
ABCC11	1.70581	2.89238	3.80996	2.70815	4.00371	6.07932	3.2824	2.91962	2.51434	2.72867	3.2824	3.01611	3.80996	3.40992	2.65078	0.671127	4.80171	3.09885	0.399364	2.96068	5.72836	3.86022	5.02712	4.90442	4.59739	5.20297	4.91423	4.09245	7.08886	3.95713
ABCC2	12.2899	12.7778	13.234	12.6541	12.006	12.1212	10.826	11.2596	12.0825	12.5542	12.2214	13.0122	12.2448	12.5917	11.2633	11.8632	13.1208	12.5192	11.2492	12.7195	12.7697	13.0001	13.5189	13.1979	13.1435	13.4482	13.4031	13.0116	13.1653	13.5436
ABCC3	12.8445	12.7913	11.1119	12.1429	12.6932	11.9769	12.9342	12.4743	11.9295	11.9794	12.702	11.8463	12.4095	11.6493	13.4482	12.4035	11.0675	11.6476	13.9106	11.908	10.756	11.2577	11.2796	10.7198	10.7354	11.4014	12.3908	11.0574	11.4486	10.7749
ABCC4	12.6627	12.9342	12.4692	12.4652	12.3836	12.4438	12.0182	12.5273	12.823	12.3657	12.2902	12.7761	12.5903	12.2905	12.3256	12.4505	12.7457	12.4489	12.5832	12.629	12.2943	12.5219	12.3221	12.3697	12.6294	12.7389	12.9462	12.899	12.8393	12.3884
ABCC5	12.2627	12.2388	11.8635	11.9405	12.4084	12.0262	12.8763	12.254	12.4419	12.373	12.2673	12.1272	12.1945	12.2148	12.4598	12.5139	11.7518	11.8453	13.0755	12.3926	11.953	12.0376	12.2549	11.6885	12.0393	12.0334	11.9223	12.0846	11.957	11.8382
ABCC6	12.7056	13.0304	13.674	13.235	12.6789	12.4	11.7085	11.9201	12.2361	12.851	12.7843	13.6418	12.7048	13.2765	12.2033	12.0941	13.3147	12.4082	11.6356	13.3466	12.6748	13.6667	13.742	13.7724	13.5043	13.8648	13.7058	13.5412	13.2978	13.4422
ABCC6P1	9.08459	9.6359	9.85749	9.34282	8.85654	9.16374	7.97706	8.51079	8.7765	8.3879	8.95318	9.7671	9.22468	9.44443	7.95526	8.60641	10.1108	9.15087	8.06384	9.70872	9.7889	10.7277	9.90119	10.3273	9.97008	10.29	10.1434	9.87325	10.236	9.09492
ABCC6P2	7.46338	8.28512	8.67949	7.96749	7.62174	8.88642	6.53201	6.9881	7.62697	7.94447	7.83485	8.61579	8.41388	7.87687	7.08193	7.28301	9.20525	8.4045	6.97989	8.44761	9.51507	8.69968	8.38199	8.66502	8.27155	8.89245	8.79953	8.44129	8.68677	8.63521
ABCC8	4.31495	6.25036	6.06039	6.95982	6.11909	4.77836	5.45828	6.14495	5.25749	6.64165	6.69985	5.98414	3.70907	6.26643	5.48316	5.94367	5.92971	4.53486	6.10986	5.36232	6.50673	6.71031	6.97571	7.50924	6.59404	6.00247	7.38013	6.86316	6.2972	6.30462
ABCC9	11.7722	11.2284	11.3063	11.7306	11.9796	10.9226	12.0649	11.9825	11.7064	11.0755	11.3514	11.2177	11.6032	11.712	12.2477	12.3826	10.4248	11.6464	11.6059	11.3576	11.4421	10.4645	10.3003	11.0258	9.88696	10.0063	9.94875	10.4503	10.6619	10.1943
ABCD1	10.2659	10.6354	10.466	10.2985	10.6524	9.79473	10.3896	10.1923	10.1404	10.2687	10.2915	10.3056	9.8481	10.4255	10.3133	10.151	9.76035	9.59307	10.1937	10.3852	9.32187	10.0315	10.0551	10.2432	10.1442	10.2324	10.1471	10.5163	10.5397	10.1768
ABCD2	6.9034	7.22025	7.47511	7.80412	7.54771	6.4365	7.14958	8.01753	7.26938	6.93096	6.98091	6.63112	7.80727	7.51574	7.37747	7.45005	6.82705	7.70727	5.85796	7.25014	7.59218	7.56757	7.33921	6.98023	7.45223	7.30127	6.76389	6.26107	6.57486	7.37003
ABCD3	11.515	11.6597	12.1318	11.7603	11.1346	11.4958	10.8955	11.044	11.4551	11.807	11.7192	12.079	11.6556	11.7762	11.4942	11.459	12.245	11.5987	11.3991	11.6207	11.5774	12.4783	12.3281	12.2959	12.2468	12.3682	12.5322	11.8643	12.2523	12.2888
ABCD4	11.8892	12.1746	12.0943	11.9561	12.0342	11.9893	12.0019	12.045	11.9982	11.9943	11.9837	12.2763	12.1168	12.1028	11.8664	11.8773	12.085	11.7888	11.8949	12.155	11.8892	12.0189	12.1218	12.0748	12.0957	12.2597	12.146	12.0622	12.1751	11.9455
ABCE1	10.2583	9.84184	10.112	10.1386	9.64815	9.52527	9.5561	9.54573	9.86244	10.2088	10.0923	10.0843	9.68446	9.80081	10.1476	10.035	9.74201	9.80104	10.4552	9.57404	9.59129	10.4294	10.3413	10.2242	10.1549	10.2226	10.1689	10.1638	10.1579	10.5032
ABCF2	11.3313	11.3538	11.21	11.1559	11.3782	11.594	11.2946	11.3038	11.2416	11.3669	11.2976	11.3109	11.4192	11.1935	11.3379	11.1896	11.2838	11.2633	11.6854	11.2295	11.1925	10.9798	11.1856	11.0472	11.0038	11.113	11.0721	11.1192	11.1253	11.0939
ABCF3	11.4675	11.5558	11.6294	11.654	11.4306	11.6468	11.4767	11.4608	11.5248	11.4592	11.6098	11.6563	11.5633	11.5616	11.3799	11.4043	11.9264	11.498	11.4702	11.5846	11.4433	11.5049	11.7191	11.6121	11.4517	11.5454	11.6649	11.6156	11.5551	11.6243
ABCG1	11.0236	11.3245	10.758	10.1828	11.3073	10.5746	10.7882	11.3029	11.3972	10.0756	11.0258	10.6322	10.6604	10.6522	11.1849	10.98	10.7244	10.9396	10.7562	11.0739	11.4871	9.66605	9.92112	10.4605	10.2049	9.9589	9.79273	10.7358	10.1503	10.4129
ABCG2	8.47031	8.22053	8.95695	8.98556	8.32928	7.98381	9.12539	8.67313	8.7092	8.02932	8.92317	8.79953	8.66412	8.58536	8.56305	8.56125	9.52569	8.63262	8.21396	8.61902	8.76602	9.30946	9.46536	9.37976	8.76695	8.98256	9.71409	9.39284	9.06271	9.06134
ABCG5	6.51257	5.87065	5.99789	5.80822	6.11909	6.41147	6.02553	6.32124	6.1968	6.87204	6.52356	6.80864	5.88505	5.25981	6.51101	6.03521	6.49416	5.93536	7.3229	5.80017	6.73228	6.10507	6.1093	4.63467	5.9195	6.49416	6.68378	5.2715	5.88266	4.87722
ABCG8	6.06397	4.44792	3.3765	4.54237	3.74891	1.87204	4.60367	4.73941	3.81645	4.95501	4.11151	5.19988	3.26453	2.76949	5.15042	3.81645	5.96787	2.992	4.35932	2.56263	3.80996	3.49109	6.03651	4.82335	5.61323	4.01092	7.39517	5.45828	4.54237	3.79573
ABHD1	7.2686	7.30333	7.45439	7.59869	7.51179	7.4017	7.56776	7.49256	7.29731	7.32614	7.6388	7.62407	7.57754	7.77935	7.2686	7.71576	7.75401	7.48855	7.24635	7.72887	7.09816	7.30047	7.48248	7.26686	6.54699	7.58097	7.2699	7.52519	7.0286	7.18469
ABHD10	10.7325	10.5155	11.2564	10.8014	10.4114	10.7823	9.91489	10.199	10.6776	10.706	10.8555	10.9816	10.7651	10.6166	10.084	10.4009	11.584	11.0332	10.0868	10.8955	11.0449	11.5175	11.5096	11.3933	11.3069	11.2452	11.5035	10.9772	11.2568	11.1936
ABHD11	10.507	10.91	10.3387	10.456	10.7505	11.1639	10.6843	10.7173	11.0122	10.857	10.8088	10.3562	10.3562	10.3963	10.5538	10.649	10.5365	10.3735	10.9678	10.6724	10.5939	10.2706	10.1373	10.2334	10.6561	10.724	10.4606	10.5032	10.5275	11.0622
ABHD11-AS1	6.06397	6.70761	5.69488	6.33875	6.57863	5.63849	6.34989	5.9265	6.30901	6.72965	6.90599	5.8428	5.74155	5.85281	5.87001	6.56625	6.29074	4.88362	6.65655	7.07214	5.22037	6.55614	6.39237	6.42882	7.37096	7.93895	6.7403	6.82705	6.39196	7.57173
ABHD12	11.3192	11.4376	11.3631	11.107	11.3747	11.7085	11.4453	11.3521	11.5592	11.2515	11.058	11.1423	11.0675	11.0818	11.2561	11.3824	11.4413	11.4424	11.3245	11.3555	11.6348	10.9599	11.1938	11.2085	11.3639	11.2926	11.3642	11.4928	11.3177	11.2382
ABHD13	8.81714	8.56035	9.09678	8.7583	8.73227	8.87101	8.71228	8.87267	9.21259	9.20832	9.16732	8.78895	8.95295	8.89245	8.81925	9.01452	9.06437	9.42259	8.9209	8.70696	9.42259	9.37244	9.15804	9.18236	9.06724	9.14158	9.00683	9.26778	9.24593	9.49339
ABHD14A	9.20238	9.20234	9.41567	9.52967	9.21492	9.9455	9.0215	9.6406	9.22165	9.04461	9.0414	9.59843	9.39743	9.17518	9.24771	8.95868	10.4326	9.91122	8.77307	9.6583	9.57331	9.38158	9.67581	9.81251	9.40501	9.44093	10.423	9.12193	9.66422	9.33239
ABHD14B	12.1527	12.0769	12.615	12.3301	12.1124	12.685	11.3901	11.9099	12.0731	12.1815	12.1267	12.4006	12.2594	12.1239	11.8546	11.8854	12.9695	12.3418	11.697	12.5186	12.5457	12.4372	12.3601	12.5418	12.4456	12.561	12.5174	12.3616	12.7677	12.3013
ABHD15	10.9376	11.2092	11.335	10.9243	10.9676	10.5448	10.8631	11.0382	10.637	10.5835	10.5944	11.3436	10.9516	11.1999	10.5607	10.813	11.3088	10.8148	10.2643	11.2539	11.3104	10.9569	10.9287	11.4438	10.7589	11.3302	10.8432	11.0152	11.2068	11.1195
ABHD16B	8.43171	8.85695	8.86367	8.88633	8.84905	8.52592	8.94931	8.7229	8.40972	8.68519	8.45931	8.68193	7.98481	8.73489	8.60338	7.8268	8.11358	7.75204	8.63521	8.74099	8.46273	8.80519	8.65363	8.91354	8.88516	8.90035	9.02376	8.94394	9.08894	8.48625
ABHD17A	11.0251	11.1152	10.8797	11.0571	11.1963	11.2984	10.9966	11.3451	11.0669	11.0421	10.8352	10.785	10.7616	10.9528	10.8376	10.4107	11.0006	11.0912	10.7377	10.9711	11.1072	10.7691	10.3003	10.74	10.7934	10.7337	10.9144	11.0636	10.9793	10.7689
ABHD17B	9.22055	9.42254	9.72711	9.29068	9.12862	9.42383	8.89358	9.17923	9.37063	9.44695	9.46173	9.74131	9.4116	9.36372	9.13093	9.02385	9.72	9.22403	9.22973	9.2696	9.38439	9.71776	9.90826	10.0869	9.92993	9.79402	9.7227	10.001	9.91859	9.90945
ABHD17C	9.36601	9.12516	9.19973	8.9389	9.11132	9.32583	9.41733	9.06843	9.58752	9.39598	9.44044	9.44919	9.12305	8.67864	9.25224	9.0469	9.34594	8.755	9.7723	9.13136	8.94307	9.37461	9.6551	9.42695	9.67955	9.70335	9.81533	9.48676	9.68032	9.46098
ABHD18	10.0758	9.95085	10.1951	10.0825	10.0215	9.57833	10.0191	9.9699	9.85543	10.1928	10.0736	10.3387	9.99833	9.98553	10.0145	10.1124	10.1332	9.79051	9.98914	10.0906	10.0174	10.2469	10.4929	10.3273	10.4169	10.4099	10.3939	10.304	10.2183	10.4201
ABHD2	13.3985	13.3721	13.3836	13.2206	13.5001	13.104	13.3244	13.4201	13.4031	13.3316	13.413	13.1975	13.3684	13.4745	13.4596	13.6418	12.8314	13.3836	13.2615	13.3415	13.2131	13.2626	13.0491	13.1021	13.0712	13.3167	13.2369	13.3021	13.2048	13.2489
ABHD3	8.90943	9.1089	9.02492	9.14552	9.04198	9.04198	9.45501	9.37063	9.31048	9.19383	9.09014	9.2169	9.51287	9.19212	9.24228	9.06328	9.25698	9.49803	9.12834	9.21194	9.91933	9.18251	9.35311	9.4076	9.14393	9.10797	9.1428	9.27365	9.3496	9.49339
ABHD4	10.5259	11.1961	11.065	11.0954	10.8442	11.5084	11.3047	10.9595	11.0497	11.1386	11.2255	10.8661	11.4293	11.0408	10.9612	11.1963	11.1391	11.0958	11.7666	11.0972	10.719	10.8558	11.2477	11.0974	11.4006	11.1961	11.2288	11.1628	11.0401	11.1714
ABHD5	9.79434	10.095	9.8876	9.35338	9.38748	10.0612	9.9329	9.56991	9.86244	10.0354	9.73702	9.80694	9.99096	9.69195	9.54352	9.7535	10.2182	9.85314	10.3974	10.0258	10.2995	9.76239	10.029	10.0806	10.0222	9.96652	9.91118	9.9348	9.80868	10.3363
ABHD6	10.6579	11.2068	11.6265	11.0644	10.4455	11.0527	10.1882	10.5271	10.9106	10.8988	10.678	11.562	11.1043	11.3181	10.4708	10.6188	12.1661	11.2494	9.86119	11.4513	11.1559	11.759	11.7512	11.847	11.4566	11.8441	11.688	11.5221	11.633	11.4059
ABHD8	9.45376	9.70626	9.65747	9.70021	9.8894	9.64815	9.72491	9.93609	9.7318	9.56527	9.51212	9.68446	9.6222	9.79337	9.60833	9.21259	10.033	9.70555	9.57523	9.72711	9.68561	9.45344	9.41713	9.4825	9.7954	9.85165	9.69494	9.9027	9.81214	9.39543
ABI1	11.1272	11.2124	11.1944	11.2461	11.2434	11.3877	11.2676	11.4415	11.4387	11.1123	11.1641	11.1678	11.4898	11.2294	11.2822	11.4355	11.1584	11.377	11.3238	11.163	11.0094	11.1781	11.3638	11.3513	11.4399	11.386	11.4427	11.104	11.2341	11.319
ABI2	12.2616	12.122	12.2434	12.2219	12.2621	12.3013	12.3783	12.4395	12.419	12.2588	12.2921	12.1794	12.3192	12.1521	12.342	12.4516	12.3744	12.5764	12.2267	12.2955	12.6741	12.3573	12.3266	12.142	12.218	12.3195	12.3443	12.3138	12.2921	12.2069
ABI3	9.67459	9.72491	9.32845	9.60234	9.80606	9.4187	10.5662	10.2637	9.65272	9.49904	9.40354	9.40067	9.56822	9.97131	10.2457	9.57289	9.10797	9.63726	9.6008	9.35796	9.12495	9.32136	9.06046	9.10567	9.31756	8.40316	9.39048	9.47615	9.1967	9.36551
ABI3BP	11.3662	11.4038	11.258	11.337	11.1963	10.1054	10.9137	10.6769	10.9134	10.6444	11.5347	11.1072	11.3762	11.7108	11.1701	11.5464	10.3153	11.1897	10.774	11.2039	10.2359	11.1654	11.3864	11.6083	11.355	10.9741	11.4115	10.9447	11.2173	11.3605
ABL1	12.9281	12.8518	12.6091	12.8596	13.0578	12.5045	13.0157	13.0671	12.7858	12.8437	12.8369	12.794	12.7468	12.7746	13.0428	12.8961	12.6051	12.4456	13.1306	13.1198	12.3064	12.5273	12.7129	12.7835	12.9805	12.7346	12.7746	12.6414	12.7721	12.8678
ABL2	12.0498	11.7912	11.7232	11.5958	12.0756	12.1728	12.1417	12.185	12.1483	11.9068	11.9334	11.6358	12.028	11.7631	12.0869	12.335	11.9205	12.0176	12.2978	11.72	12.223	11.5155	11.6995	11.505	11.7863	11.6232	11.4896	11.8188	11.5005	11.7422
ABLIM1	14.2005	14.106	13.742	13.9241	14.1434	14.2617	14.2414	14.0776	14.2468	14.2817	14.3396	13.8521	14.2115	13.7498	14.2896	14.2779	13.8648	14.0198	14.2933	14.1329	13.876	14.013	13.9954	13.7539	13.8028	13.7843	13.8783	13.8248	13.9079	13.8886
ABLIM2	10.3729	10.0353	9.50599	9.5694	10.0446	9.75615	9.46457	9.81094	9.69275	10.1124	8.96435	9.41288	9.4358	9.94604	9.22577	10.1817	8.91976	9.75004	9.75849	9.19629	9.57594	9.81481	9.65272	9.46767	10.0828	9.46457	9.47631	10.4562	9.97441	9.91859
ABLIM3	11.2993	11.9912	11.5716	11.5821	11.3068	11.667	10.362	11.3208	11.4574	11.8814	11.6682	11.443	11.379	11.2359	10.7729	11.3253	11.5791	11.0292	11.0423	11.5732	12.0923	11.1752	11.7409	11.5849	12.0722	12.1815	11.2004	12.3189	11.3827	11.8345
ABO	8.30374	11.1145	10.7083	10.5175	9.39054	9.09874	9.94287	8.67666	9.63102	10.4369	9.50663	10.9016	9.83272	10.0964	9.00573	9.71282	9.73702	8.78895	9.59324	10.8894	8.82361	11.1094	10.1941	9.85655	8.34393	11.1211	11.368	10.6969	11.1208	9.05359
ABR	12.5807	13.0251	12.8763	12.6895	12.9032	12.1088	13.0755	12.8865	12.4715	12.4131	12.403	11.9505	12.473	12.694	12.8043	13.0632	11.1353	12.3076	12.5092	12.3213	12.2018	12.9604	11.5181	11.9681	13.0269	11.731	12.7608	12.9308	13.0632	12.5642
ABRA	7.17368	6.21811	6.11284	6.23759	5.99472	6.07932	6.11909	5.69488	6.5803	6.78592	6.86873	6.6669	6.07366	6.46882	6.45365	6.60914	6.60356	6.55942	7.15165	6.54226	5.94966	5.37231	5.93939	2.94796	4.34684	6.03717	5.5699	5.57356	5.10005	5.49529
ABRACL	8.6015	9.01382	8.76453	8.56758	8.4351	9.68101	8.14807	9.26397	9.16732	8.89394	8.71549	8.87332	9.33661	8.59443	8.55166	8.80973	9.39444	9.45277	8.91324	8.83096	10.2279	8.79277	8.90164	8.62572	8.83511	8.83057	8.6789	8.68879	8.56852	9.07502
ABT1	9.48938	9.63398	9.40986	9.52497	9.75397	10.2577	9.49356	10.0048	9.88086	9.60033	9.57431	9.34896	9.84296	9.5042	9.72518	9.47897	9.99914	10.1638	9.61564	9.4919	10.1086	9.01296	9.08282	9.45539	9.37571	9.5285	9.19999	9.3519	9.30476	9.3502
ABTB1	10.7168	10.8756	10.785	10.9684	10.9316	10.698	11.5106	11.0283	10.7767	10.6822	10.8509	10.7782	10.7711	10.9152	10.7877	10.6797	10.7987	10.6531	10.5633	10.9913	10.6153	10.9021	10.7072	10.9583	11.038	10.7708	10.8093	11.0046	10.7143	10.4494
ABTB2	11.107	11.4255	11.3506	10.75	11.1051	10.6898	11.494	10.8645	10.6227	11.1589	11.0497	11.007	10.7666	11.0965	10.9646	10.9319	10.6287	10.4541	11.5035	11.3111	10.1379	11.4419	11.3994	11.5293	11.657	10.8516	11.0577	11.9169	11.4412	12.0023
ACAA1	13.2068	13.545	14.0042	13.7086	13.0922	13.863	12.6889	13.1332	13.0024	12.9577	12.8518	13.9241	13.616	13.8907	12.8649	12.7377	14.5438	13.913	12.576	13.7886	14.0272	13.9954	13.8739	14.071	13.9002	13.9286	14.1527	13.7577	14.0616	13.7274
ACAA2	13.0358	13.3985	13.8886	13.2044	12.7751	13.7148	12.4507	13.0543	13.4671	12.907	13.1886	13.639	13.7205	13.4888	13.1947	12.9586	14.2896	13.5803	12.8853	13.7388	13.5899	13.7768	13.9211	13.7004	13.7949	13.799	13.7309	13.3684	13.7023	13.4819
ACACA	12.398	12.1541	11.9131	12.001	12.3921	12.3604	12.1275	12.2023	12.3032	12.4205	12.2495	11.8364	12.1151	11.927	12.3461	12.3657	11.7488	12.3118	12.7063	12.0781	12.5525	11.738	11.846	11.488	11.6381	11.5421	11.6207	11.7934	11.6883	11.6192
ACACB	13.4175	13.7641	13.512	13.3684	13.2643	12.5231	13.9402	13.0246	13.0341	13.1	13.3907	13.5205	12.766	13.5783	13.104	13.3595	12.983	13.1807	12.6439	13.4596	13.2699	13.6618	13.6121	13.5848	13.4804	13.4422	13.586	13.7217	13.4804	13.3163
ACAD10	12.2755	12.3495	12.4958	12.4495	12.1983	12.1239	11.962	11.9722	12.1532	12.3571	12.3855	12.5883	12.307	12.2349	12.0951	11.9569	12.3916	11.8347	12.1437	12.4589	11.9097	12.5231	12.5487	12.6424	12.5718	12.5655	12.5277	12.4894	12.5155	12.3727
ACAD8	11.004	11.1647	11.6214	11.1408	10.8736	11.5049	10.574	10.813	11.006	11.1419	11.0512	11.4172	11.3504	11.0222	10.8613	10.8329	11.8641	11.284	10.8329	11.2858	11.4503	11.5014	11.7158	11.5409	11.5005	11.4583	11.4172	11.2897	11.4468	11.1774
ACAD9	11.406	11.5107	11.4353	11.3752	11.4823	11.5398	11.5974	11.3981	11.4355	11.3971	11.504	11.4685	11.3559	11.457	11.3816	11.3623	11.7049	11.3562	11.5067	11.4143	11.5199	11.437	11.5904	11.4276	11.4366	11.4546	11.5518	11.4119	11.339	11.3806
ACADL	9.94822	10.0066	10.4265	9.94143	9.69071	9.81214	9.23301	9.38192	9.8654	10.1882	10.3526	10.3836	9.81318	9.95074	9.62501	9.59628	10.9228	9.79051	9.93391	10.2647	10.061	10.6712	10.8756	10.6609	10.4464	10.9638	10.9728	10.1662	10.5966	10.6049
ACADM	11.6241	11.568	12.4305	12.035	10.9701	11.6325	10.6567	10.8993	11.4375	11.8138	11.5488	12.2721	11.9018	11.8811	11.4972	11.2995	12.7338	11.8597	10.896	11.877	11.8411	13.0314	13.0632	12.8639	12.8997	12.7721	13.0036	12.0039	12.4122	12.508
ACADS	11.3609	11.6096	11.5997	11.3797	10.9974	11.9359	10.6081	11.3552	11.3848	11.4621	11.1761	11.6538	11.4895	11.5123	11.1269	10.6406	12.2306	11.4898	11.3167	11.5967	11.6566	11.6086	11.5624	11.7847	11.6685	11.8786	11.8053	11.8359	11.9205	11.6192
ACADSB	12.8875	13.1083	13.9425	12.9993	12.2902	12.4073	11.478	11.6257	12.5721	12.983	12.7177	13.4915	12.737	13.2626	12.2285	12.6603	13.5718	12.9679	12.085	13.6683	13.5594	13.9079	14.106	13.9954	14.1512	14.0884	13.7455	14.0198	14.1512	13.527
ACADVL	14.1879	14.5361	14.3396	14.4839	14.1684	14.5042	14.6018	14.1473	14.3585	14.0922	14.0381	14.411	14.9076	14.6018	14.3912	14.254	14.411	13.9984	14.4403	14.6062	14.1153	14.3734	14.3027	14.2617	14.4993	14.387	14.5664	14.1839	14.494	14.387
ACAN	9.25755	9.46677	9.74201	8.87077	9.58223	9.17103	6.82451	8.3496	9.03684	9.86381	9.3496	8.59844	6.89353	9.74878	9.1162	9.92869	7.88385	8.89708	8.83932	8.9543	8.05409	8.59996	7.85431	9.28484	8.53834	8.95378	8.98111	8.88716	10.065	9.06965
ACAP1	10.6561	10.2749	10.077	11.0033	11.1767	9.87947	11.6309	11.0875	10.3701	9.7342	10.5509	10.1589	11.0839	11.0375	11.167	10.8954	9.18749	11.085	10.0935	10.3697	9.65731	9.88156	9.26132	9.80772	9.71595	9.66054	9.40721	9.72334	9.67275	9.70263
ACAP2	11.094	10.9365	11.0634	11.1808	11.1076	10.9462	11.3748	11.241	11.2903	11.0091	11.0927	11.0472	11.2749	11.235	11.2121	11.3362	10.783	11.2645	11.0549	10.9234	10.9598	11.1696	11.2276	11.0764	11.1091	11.0537	11.0247	11.0747	11.0342	11.0772
ACAP3	11.5386	11.9549	11.7985	11.8482	11.7168	10.8463	11.8857	11.3235	11.3653	11.5551	11.4003	11.6186	11.0851	11.7397	11.461	11.2126	10.72	10.6644	11.6318	11.7446	10.4559	11.454	11.3038	11.3406	11.6003	11.4691	11.4301	11.7006	11.6106	11.4521
ACAT1	12.8695	12.9005	13.756	13.2013	12.4812	13.3608	12.0476	12.5107	12.9105	13.1683	13.1541	13.6516	13.2172	13.2088	12.6642	12.5938	14.2414	13.4463	12.4473	13.4928	13.7398	13.9655	14.0434	13.9055	13.8716	14.0042	13.9402	13.4217	13.6889	13.742
ACAT2	8.83133	8.873	9.21332	8.89806	8.72503	9.73588	8.58503	8.76967	9.2059	9.05121	8.62087	8.98927	8.90012	8.70466	8.97752	8.75272	9.69253	9.48919	9.09678	9.1544	9.70765	8.88019	9.58032	8.96476	8.96331	9.09361	9.12305	9.22872	8.99507	9.52201
ACBD3	10.8146	10.9424	10.8613	10.9591	10.5791	10.8477	10.8033	10.7216	10.8064	10.8194	10.7833	10.8909	11.1353	10.8944	10.8706	10.8924	10.8237	10.8061	11.072	10.8797	10.5141	10.8274	10.9614	10.8782	10.9121	10.7917	10.9599	10.8667	10.8146	11.1352
ACBD4	10.7854	10.9984	11.3251	11.3337	10.7327	10.7917	10.8897	10.6679	10.5734	10.9072	10.8235	11.5134	10.8251	11.2275	10.6954	10.74	11.6597	10.8363	10.521	11.3418	11.0682	11.4774	11.4648	11.3473	11.2552	11.5918	11.6398	11.4639	11.887	11.0181
ACBD5	11.1967	11.3834	11.5375	11.3686	10.7968	10.9815	10.9243	10.9715	11.113	11.3034	11.3088	11.4312	11.3358	11.4728	10.988	10.9936	11.2261	11.0561	11.052	11.4345	11.572	11.83	11.833	11.9167	11.6376	11.68	11.7111	11.535	11.7208	11.6942
ACBD6	10.1368	10.176	10.1358	10.09	10.1704	10.3645	10.1987	10.2657	10.207	10.0712	10.0224	10.1399	10.2241	9.99448	10.0288	9.82726	10.1219	10.3001	10.1496	10.2063	10.3739	10.1152	9.95104	9.96144	10.0609	10.0838	10.0791	10.0155	10.1988	9.87662
ACCS	10.5599	11.1564	9.7569	11.2253	11.235	10.1895	11.222	10.2958	11.0744	11.2741	11.2338	10.9401	10.1646	10.6273	11.6429	11.2256	10.4373	10.6886	10.3864	11.4944	11.4323	10.8751	11.1001	10.3679	10.5898	11.5063	10.8654	10.4453	10.9118	10.7284
ACD	9.37175	9.2786	9.48748	9.70708	9.65763	9.48759	9.54321	9.84892	9.37063	9.26397	9.459	9.56214	9.57808	9.48989	9.64202	9.54872	9.68875	9.62813	9.5825	9.46799	9.23574	9.39575	9.39795	9.65434	9.64798	9.53494	9.34789	9.79687	9.33661	9.37291
ACE	10.4956	11.5302	13.2392	12.6953	11.2467	9.92644	10.5695	10.4654	10.0699	10.1284	11.4224	12.6998	11.41	11.5531	10.1965	10.7	11.1469	9.42125	10.7151	12.7998	12.164	12.3382	12.4043	13.3734	12.3573	11.4499	12.4225	12.7067	12.695	12.3088
ACE2	12.1939	12.2465	13.1241	12.6275	12.0115	11.9	11.0584	11.6613	12.0892	12.6286	12.5248	13.1749	12.7135	13.0261	12.4159	11.7012	13.3876	12.123	11.7759	12.8727	12.6394	13.135	13.5009	13.4482	13.0001	13.6493	13.2869	12.6115	13.0374	13.082
ACER2	8.3194	8.78205	8.27182	8.50622	8.62024	8.50878	8.25627	8.44099	8.54215	8.77125	8.35186	8.05496	8.30812	8.6437	8.38563	8.60641	8.51169	8.33869	8.93374	8.57906	9.13509	8.38049	8.4169	9.13121	9.30878	8.2048	8.68529	8.54588	8.30391	9.15923
ACER3	10.2974	10.3593	10.5583	10.2193	10.4164	10.8099	10.5534	10.5526	10.5087	10.4922	10.4021	10.4761	10.4595	10.6212	10.4615	10.6188	10.2915	10.4831	10.3626	10.4583	10.2798	10.275	10.3941	10.2997	10.1285	10.2949	10.2185	10.5363	10.2808	10.6262
ACHE	7.91422	7.57754	7.19174	7.70489	7.781	7.43646	8.48508	8.4045	8.06816	7.39186	7.60892	8.0024	8.1593	8.225	8.42839	7.90156	7.14409	7.66905	8.95017	8.05214	7.24325	6.46984	7.04494	7.05364	7.39237	8.11398	6.88536	7.59197	7.32231	7.72856
ACIN1	13.2542	13.2285	12.9906	13.2392	13.3477	12.8124	13.5732	13.3492	13.143	13.0418	13.3427	13.0439	13.3327	13.2733	13.3521	13.3824	12.6315	12.9993	13.4138	13.2275	12.5723	12.9175	12.8997	12.9042	12.9881	12.9421	12.983	12.8758	12.9028	12.9667
ACKR1	9.43254	9.69945	7.73797	9.57786	10.4766	10.7644	11.2498	9.60969	10.3502	9.77393	9.95869	8.38984	10.7304	10.5841	10.858	10.2454	7.67838	9.84095	10.8536	8.99677	9.58263	6.66123	6.55319	6.7141	6.06187	5.6916	7.38013	6.62316	6.03765	8.02044
ACKR2	8.49302	7.76858	7.41172	7.78389	7.60268	7.44532	8.49777	7.01144	7.84621	8.122	8.53207	7.97332	7.50742	7.45284	9.02958	7.98423	7.40015	6.84655	9.49323	7.35255	6.56099	7.68267	7.47025	8.03609	7.35708	7.53276	8.08756	7.61172	7.78254	7.63701
ACKR3	8.94119	9.00078	8.75985	8.7583	8.50439	8.7093	8.35831	8.1847	8.65363	8.52294	8.86657	9.286	8.52875	8.76924	8.72259	8.84949	9.09956	8.46422	8.85046	8.7473	8.40764	8.67603	8.86119	8.99327	8.82028	8.91045	8.81425	9.02295	8.86177	9.73454
ACKR4	7.36629	6.95982	7.79919	7.50082	6.86771	7.14813	6.68378	6.88536	7.2212	7.35049	7.73951	7.51346	7.26816	7.45284	6.52946	7.10746	7.72676	7.48012	6.60029	7.23984	7.57286	8.43992	8.63665	8.31228	8.4056	8.18299	7.81096	8.11055	8.32547	7.47348
ACLY	13.6401	13.8028	13.6226	13.6667	13.687	13.5472	13.235	13.49	13.4618	14.1576	13.8669	13.8381	13.7086	13.6475	13.6624	13.454	13.4334	13.1588	14.1615	13.7615	13.0969	13.6944	13.8178	13.5303	13.6704	13.6583	13.5886	13.8315	13.4837	13.5402
ACMSD	11.3557	11.3006	11.9713	11.5958	11.0647	12.1228	10.0885	11.0818	11.131	11.4329	11.2274	12.1214	11.64	11.4587	10.8077	11.0091	12.8518	12.1163	10.7321	11.9834	12.7516	12.0432	12.3274	12.2899	11.9436	12.1865	12.055	11.8203	12.0421	11.7254
ACO1	13.0567	13.4596	14.1909	13.1612	12.7905	13.3427	12.3232	12.3954	12.7472	13.1031	13.0522	13.7331	13.4019	13.5718	12.5437	13.2626	13.6598	13.2516	12.5819	13.8202	13.3595	14.0317	14.0651	14.0557	14.0616	14.1542	13.8835	14.1153	13.913	14.0074
ACO2	13.4422	13.6121	14.071	13.5834	13.1158	13.4231	12.8487	12.9458	13.3697	13.5702	13.4217	13.9895	13.4811	13.7331	12.9954	13.0188	13.9425	13.1513	13.1594	13.8153	13.4031	14.0074	14.1396	14.1473	14.1576	14.1005	14.1725	14.1684	14.1246	14.0304
ACOT1	8.26679	9.86191	9.17686	10.2633	9.14057	10.1297	8.2335	8.13893	9.29864	9.42512	8.43448	9.24982	9.16542	8.71897	8.69946	7.96172	9.80868	8.53773	8.09417	9.00009	9.48233	8.98637	10.3622	10.5986	9.18565	9.41463	9.26155	8.91227	9.24982	9.17324
ACOT11	11.416	11.4433	12.0282	11.5821	11.1867	11.2594	11.4583	10.9984	11.3311	11.5938	11.6519	11.863	10.846	11.2238	11.0718	10.8243	11.8359	11.07	11.1103	11.8038	11.5096	11.7896	12.1263	11.7366	11.7301	11.9873	12.1299	11.9645	12.2511	11.6519
ACOT12	7.60355	7.09852	8.57737	6.86211	6.47514	7.46542	6.58609	5.65949	6.5803	7.24303	7.41157	7.45316	6.93609	6.644	5.05484	6.85643	8.0226	7.41172	4.7429	7.41558	7.79551	8.88405	8.15247	8.71216	8.59834	8.9496	8.03335	8.44847	8.95341	8.69356
ACOT13	10.9322	10.8357	11.4995	10.9974	10.5928	11.1974	10.3896	10.5868	10.7589	10.781	10.7371	11.2867	10.9919	10.8645	10.5236	10.79	11.787	11.3838	10.3244	11.2586	11.8104	11.3707	11.5772	11.4506	11.2403	11.6561	11.5492	11.1337	11.3588	11.2591
ACOT2	10.8048	11.317	11.5818	11.3644	10.6252	11.6196	9.99982	10.6013	10.9643	11.0301	10.797	11.5171	11.0801	11.1078	10.3406	10.2209	11.9941	11.0505	10.6616	11.4395	11.3729	11.237	11.6027	11.877	11.5506	11.6937	11.828	11.5974	11.7588	11.4208
ACOT4	8.90097	9.00556	9.18698	8.94394	8.52687	9.6192	7.69402	8.61541	8.56253	9.0389	8.61005	9.7649	8.69827	8.85046	8.1257	8.24432	10.273	9.42512	7.97776	9.42352	10.2162	9.00362	9.79195	9.61658	9.4406	9.71682	9.73193	9.55867	9.5246	9.47018
ACOT6	6.75624	6.47356	7.10594	7.21182	5.51137	6.69963	5.88964	6.11564	5.67095	6.8152	6.56099	7.40061	6.00762	6.24123	5.84066	5.45154	8.12671	7.11946	6.42051	6.89732	7.5373	7.38853	7.32172	7.62758	6.90938	7.65562	7.68783	6.81337	6.96415	6.8859
ACOT7	11.3829	11.6207	11.7399	11.4689	11.0563	11.8296	10.1228	11.1007	11.6842	11.7997	10.8922	11.802	11.3664	11.5976	10.4116	10.5423	12.4205	11.2893	10.4497	11.6486	11.9691	11.9247	12.0409	12.3123	12.4176	12.4594	12.0579	12.5542	11.8486	11.7573
ACOT8	9.84697	9.82593	9.76451	9.6093	9.78469	10.1122	9.66218	10.0048	9.83945	9.66455	9.45157	9.81449	9.53541	9.71217	9.49878	9.49704	10.2674	9.96213	9.39033	9.78306	10.5041	9.6538	9.80931	9.78987	9.83223	9.80429	9.78167	9.88206	9.84026	9.51251
ACOT9	10.6314	10.4481	10.3145	10.3668	10.7721	10.5178	10.8237	10.507	10.6491	10.59	10.6951	10.6322	10.5404	10.6296	10.5704	10.8968	10.4864	10.5241	10.9304	10.3726	10.4337	10.4744	10.4624	10.5353	10.1261	10.4934	10.3646	10.4522	10.3063	10.8011
ACOX1	13.2922	13.4188	13.8109	13.4188	13.1	13.2733	12.6281	12.7325	13.0089	13.3876	13.2182	13.6475	13.3266	13.5176	12.9749	13.1557	13.6086	13.4928	12.8827	13.5319	13.5319	13.9481	14.0464	13.8178	13.8202	13.8178	13.9833	13.6962	13.8669	13.8338
ACOX2	11.9077	12.3483	12.8205	12.1501	11.3623	11.9131	10.6448	10.8743	11.4888	11.9038	11.7882	12.4456	11.7819	12.2446	10.8304	11.4958	13.002	11.9954	10.3012	12.1853	12.4276	12.6756	12.7285	12.8808	12.8385	12.8437	12.9191	12.4425	12.6582	12.4301
ACOX3	10.8855	10.7926	10.8349	10.5958	10.7894	10.46	10.7979	10.433	10.4925	10.67	10.8391	10.9548	10.578	10.8217	10.7008	10.6247	10.8984	10.4222	10.8719	10.7793	10.4137	10.8837	10.8058	10.9121	10.8572	10.9169	11.0577	10.8828	10.8319	10.7263
ACOXL	4.31495	4.30026	4.61145	6.20381	5.06969	6.15739	5.67834	5.84066	5.37697	4.84413	5.32096	4.98946	6.63622	5.85281	6.85995	5.36274	5.61918	4.77498	5.88542	6.41883	6.34809	6.18929	6.25036	5.69287	5.27303	5.56592	5.08884	3.97823	5.03667	4.75551
ACP1	10.8603	10.7251	11.16	10.833	10.6548	11.6027	10.7251	11.0557	11.0775	10.8778	10.797	10.9409	11.0553	10.7981	10.6827	10.7067	11.5585	11.5163	10.6908	11.0233	12.0347	11.0826	11.111	11.2309	11.0946	11.0937	11.0794	10.7937	10.9651	11.1789
ACP2	11.0547	11.5392	11.5127	11.1826	11.1484	11.362	11.0399	11.005	11.414	11.3527	11.2962	11.3567	11.1173	11.4228	11.0063	11.061	11.5848	11.1197	11.1182	11.4879	11.3161	11.3154	11.3159	11.5697	11.358	11.5184	11.3809	11.5173	11.3876	11.1621
ACP5	12.2996	12.5299	13.0979	12.6397	11.7034	13.122	10.5601	12.1402	12.745	12.6499	11.7103	12.6684	12.0186	12.6752	11.4301	11.5464	13.4175	12.6351	11.4868	13.0358	13.1297	12.5505	12.6976	12.8569	12.766	13.0153	12.642	12.8553	13.1	12.8334
ACP6	10.9624	10.4947	10.8349	10.776	10.405	11.1056	11.1097	10.4576	10.5657	10.4802	10.8814	10.3443	10.8131	10.6205	10.675	10.5872	11.1364	10.8784	10.8131	10.7347	11.3288	10.8937	11.0569	10.7651	10.5939	10.8967	10.5517	10.4934	10.3874	10.44
ACPP	10.0242	10.5891	10.2884	10.5597	10.4367	10.4109	11.1617	9.98795	10.6414	10.2028	10.4995	10.3326	10.0037	10.4309	10.3025	11.112	11.2208	10.3619	8.26795	10.9404	8.72806	11.6144	11.2341	10.4451	11.1701	11.0001	11.3077	10.4208	10.9976	10.1144
ACPT	5.32325	6.16618	5.8761	5.56135	5.83514	5.32507	6.41967	6.14495	5.41845	6.13104	5.5291	6.40737	5.21802	5.51476	6.08287	6.30462	5.87001	6.01628	6.61934	6.47564	5.65243	5.7881	5.68013	5.69287	5.72836	6.54748	5.65949	5.68013	6.16662	6.10803
ACRBP	7.53153	6.97477	7.47511	7.64792	7.89365	7.65845	8.36717	7.84153	7.50428	7.20661	7.35977	7.66928	7.59539	7.49289	7.43368	7.4249	7.61172	7.0957	7.23736	7.10835	6.66644	6.9881	7.46059	7.2964	7.33775	7.63449	7.45284	7.44713	7.27509	7.44378
ACSBG1	5.62066	5.36274	6.5337	6.33875	6.08876	6.47401	6.22516	6.3	6.03255	5.74658	5.16338	5.76391	5.74155	6.26643	5.6537	5.7768	6.23861	6.08504	6.57863	6.3906	6.06566	5.7881	6.39237	5.69287	5.57743	5.56592	5.79529	6.23861	5.52946	6.19019
ACSBG2	7.12953	6.80271	7.0137	7.26886	6.91509	6.92791	6.79073	6.57662	6.74742	6.84426	7.32085	7.63119	7.17891	6.92843	7.30754	6.72866	8.57218	7.42048	6.33375	7.23984	7.75295	7.69112	8.07907	8.05858	7.32362	7.85142	7.79908	6.60563	7.63949	6.46922
ACSF2	13.5205	13.4774	14.4643	13.8315	13.0717	13.6357	12.0579	12.6795	13.1297	13.674	13.4951	14.3964	13.51	13.8783	12.8451	12.8937	14.3496	13.6002	12.5996	14.0922	13.6475	14.4643	14.6457	14.7426	14.6457	14.4993	14.5216	14.454	14.4204	14.4358
ACSF3	11.2821	11.3528	11.3972	11.1745	11.3358	11.0231	11.4548	11.2689	10.8098	11.1989	11.2172	11.4117	11.0233	11.4192	11.1391	11.192	11.2001	10.852	11.2456	11.3712	10.7842	11.2867	11.2926	11.2353	11.1874	11.2377	11.2495	11.2826	11.2576	11.1649
ACSL1	13.8956	14.2081	14.2502	13.723	13.3215	13.693	13.5436	13.1167	13.6535	14.0616	13.6889	13.7188	13.6798	14.0589	13.3215	13.6226	14.013	13.4073	13.4671	13.8848	13.8429	13.9576	14.1977	13.7854	14.2382	14.106	14.1396	14.3265	14.0922	14.2704
ACSL3	10.9163	10.6477	11.1109	10.7955	10.5703	10.5989	10.5413	10.2833	10.8593	10.9516	10.9959	10.9419	10.6409	10.6807	10.8629	10.8027	10.8179	10.5241	10.9234	10.8767	10.4784	11.387	11.3144	11.2309	11.2077	11.2239	11.2209	11.337	11.2024	11.4835
ACSL4	12.0466	12.4256	12.0774	12.1808	12.521	12.8856	11.8146	12.4416	12.6698	12.7545	12.3438	11.8563	12.6318	11.8166	12.5877	12.8609	11.6724	12.4792	12.7872	12.3786	11.7503	12.3752	12.3206	12.0133	11.9778	11.9427	11.6173	12.1485	12.2625	12.314
ACSL5	9.83409	10.0217	9.5758	9.98568	10.2545	9.93158	10.5601	10.3615	10.0261	9.95392	10.3125	9.77769	10.3719	10.3809	10.4879	10.4204	9.31587	10.17	10.1955	9.57644	9.88898	9.61491	9.46926	9.6222	9.60887	9.38663	9.3015	9.54429	9.02869	9.83327
ACSL6	7.83268	7.80243	8.66314	8.77307	8.35961	8.39831	8.03396	7.78071	8.2282	8.71518	7.9964	8.80667	8.07012	8.06291	7.86136	7.88385	8.91976	8.1598	8.82318	9.01974	6.25089	9.61491	9.4726	9.24299	9.43254	9.05284	8.81425	8.73103	9.54482	8.40493
ACSM1	8.81145	8.60905	7.70602	7.37551	8.97704	8.88877	8.2775	9.0784	8.27852	7.7193	8.32868	7.84852	8.97836	8.33833	8.93245	8.31408	6.76699	8.43042	8.00853	8.27509	8.19099	6.96085	7.6722	7.28188	7.69839	6.73498	7.31681	7.95647	7.20206	7.51805
ACSM2A	14.1365	14.3912	15.2428	14.4019	13.7539	13.9211	12.9331	13.4549	14.4889	14.3541	14.0802	14.3781	14.5438	14.6339	13.1925	13.8315	14.8435	14.0492	13.3951	14.7023	14.4591	15.1677	14.8765	15.2292	14.6681	15.2568	15.0919	14.9976	14.8205	14.9418
ACSM2B	14.0223	14.3177	14.6888	14.5216	13.5635	14.4751	12.4445	13.5189	14.1725	14.4061	14.0679	14.8088	14.2468	14.6116	13.3349	13.6974	15.1677	14.2468	12.827	14.3781	14.5167	15.017	15.2168	15.3597	14.7629	15.3597	14.9606	14.8205	15.008	14.7091
ACSM3	11.2221	11.2926	11.9253	11.4268	11.0563	11.4004	10.4703	10.1874	10.8473	11.16	11.4136	11.7939	11.1814	11.6171	11.6418	11.0148	12.1736	11.6393	10.6215	12.0072	11.2586	12.3108	12.5186	12.316	11.8843	12.1053	12.1606	11.2319	12.0822	11.4506
ACSM5	10.3619	10.7947	10.7562	11.0909	9.79808	10.9654	9.90846	10.0888	9.9581	10.8095	10.9948	11.4827	10.6827	10.7699	10.3834	10.5149	12.2091	11.1477	8.19099	11.2409	11.4578	11.3308	11.7004	11.6982	11.009	11.882	11.5649	10.5763	11.5458	11.3797
ACSM6	6.6774	7.07158	7.30388	6.74209	6.75915	7.04905	7.32915	6.65414	7.30439	6.94357	6.84317	7.24769	6.84881	6.78629	7.75082	7.34463	7.20234	7.39368	6.52127	6.91509	7.20436	7.01888	6.93624	6.75171	7.03244	7.59598	7.02905	7.44713	6.63555	7.44378
ACSS1	12.452	12.4694	12.2458	12.2808	12.0272	12.0355	12.2888	12.1584	12.2097	12.5428	12.2278	12.305	12.0677	12.0105	11.9526	11.8472	12.3712	11.9185	11.8001	12.2839	11.9266	12.4165	12.4076	12.3263	12.3836	12.5348	12.5693	12.5617	12.5421	12.1284
ACSS2	12.4559	12.6575	13.0647	12.7006	12.3429	12.8131	12.0805	12.1623	12.2744	12.7682	12.4425	12.8971	12.6424	12.8389	12.1358	12.2473	13.2791	12.6881	12.2819	12.8639	13.1633	13.0846	13.1374	12.9935	12.8908	13.0093	13.2127	12.9561	13.0358	13.1267
ACSS3	11.7331	11.9603	12.3359	11.5758	11.4143	11.5913	11.1097	11.1377	11.5592	11.7546	11.832	12.1105	11.7387	11.6629	10.9081	11.3463	12.0332	11.6493	11.5075	11.9987	11.951	12.0443	12.373	12.3516	12.0581	12.2162	12.3855	11.8337	11.8081	11.9917
ACTA1	15.3489	4.02451	3.53829	2.99865	3.33136	3.20749	7.82046	5.21723	0.397764	2.97938	2.65464	3.24497	7.17891	2.59218	5.5819	2.50436	3.74256	3.22495	5.73327	2.23044	3.31022	2.45159	0.419361	3.30138	4.20448	4.01092	3.67448	2.97938	4.19666	3.95713
ACTA2	11.5475	11.4299	11.671	11.8587	11.9688	12.2648	11.16	11.3901	12.0081	11.55	11.5217	11.4131	11.3275	11.8201	12.0393	12.398	11.2623	12.6648	11.5834	11.5574	11.6749	11.4355	10.8116	11.5856	10.574	10.8417	11.0147	11.408	11.9661	11.072
ACTA2-AS1	7.21322	7.2686	7.80825	7.52472	7.69839	7.34333	7.04938	8.03764	7.12194	7.01144	7.4992	7.38026	7.37028	7.93361	7.12565	7.74283	7.21572	7.72658	6.52127	6.3906	7.40252	7.25929	6.72965	6.62316	5.49529	7.0612	6.26443	6.98362	7.15133	5.69762
ACTB	16.5824	16.7609	16.1982	16.6193	16.987	16.6193	16.987	16.7609	16.987	16.6807	16.8479	16.1749	16.6807	16.8479	17.4945	16.987	15.9452	16.7609	16.8479	16.3555	16.045	16.0754	15.8026	16.0754	15.9452	15.9764	16.0754	16.1982	16.263	16.6807
ACTC1	6.65791	6.07279	5.40755	4.90646	5.00902	5.37549	0.788928	3.63323	4.48225	5.89621	4.35131	4.88606	3.42115	5.01058	3.29209	5.10005	6.70973	4.40819	3.87625	3.98663	5.46241	4.65824	5.31155	4.63467	5.27303	5.35747	5.51347	5.5356	5.64721	5.35747
ACTG1	15.6707	15.7322	15.4908	15.7322	15.8845	16.2286	15.8259	16.2286	16.263	15.7146	15.7322	15.2168	15.7543	15.5915	16.1363	15.9764	14.8679	15.9452	16.1023	15.3319	15.3489	14.8841	14.6399	14.8997	14.8765	14.8918	14.9976	15.3912	15.0446	15.909
ACTG1P20	7.97578	7.95526	7.97019	7.93361	8.16897	7.49469	8.13503	8.24611	7.88979	7.89401	8.23526	7.74793	8.15189	8.0508	8.03659	8.02547	7.76182	8.02378	8.19099	7.75215	8.33071	7.85772	8.1689	7.65812	7.53339	7.99586	7.74392	7.8841	7.46761	8.00887
ACTG1P4	7.35445	7.28569	7.49396	7.15341	6.98958	6.86682	7.2621	6.9129	6.98285	6.74492	6.98091	7.27782	6.99635	7.03356	6.96157	7.20007	7.36514	6.84655	7.04187	7.10835	7.83	7.89612	7.41637	7.31037	7.19597	7.10372	6.41618	7.01888	7.60499	5.97996
ACTG2	6.02553	4.95501	3.68552	6.54127	4.67141	4.8782	2.65078	4.44233	4.11506	4.06154	4.35131	5.98414	2.45159	3.40992	6.08287	6.19134	7.76807	4.53486	4.10311	4.13183	4.13381	1.99808	4.71707	2.94796	1.04901	2.70815	5.99789	3.21267	0.434558	2.36515
ACTL10	7.84153	8.46701	8.45407	8.16412	8.25144	7.8778	8.17594	8.14612	7.79754	8.22178	8.0391	8.43686	7.85475	8.07508	8.13354	7.92642	7.92326	7.63038	8.21937	8.61426	7.5373	8.08987	8.60807	8.22069	8.46315	8.26448	8.37131	9.00993	8.35262	8.48625
ACTL6A	9.55275	9.4406	9.43342	9.46336	9.44836	9.81808	9.4042	9.5558	9.76692	9.64624	9.74273	9.44919	9.76332	9.26902	9.66098	9.62614	9.74499	9.67581	10.0496	9.42804	9.48833	9.34129	9.52022	9.31926	9.21125	9.42593	9.32744	9.09729	9.32373	9.49072
ACTN1	12.7725	12.9944	12.26	12.6847	13.0657	12.7566	13.3316	12.7063	12.8079	12.5457	12.7085	12.0831	12.7117	12.7551	13.5255	13.2109	11.1253	12.6397	13.5803	12.4495	11.8271	11.4914	11.4958	11.9764	11.5087	11.3083	11.476	11.9807	11.8632	12.0355
ACTN2	12.8064	5.15136	5.10462	5.09392	5.47723	4.77836	6.28829	5.63388	4.31828	4.55192	4.21961	5.1063	5.53173	4.12366	5.55064	4.31694	5.79941	4.93316	5.56808	4.59739	5.69049	6.02553	6.70973	6.48554	6.33223	5.96115	6.03112	6.18839	5.58325	6.61318
ACTN3	9.0703	4.10647	4.61145	4.81416	4.38955	2.76949	6.02553	4.80028	4.73799	4.33365	4.70279	4.38589	4.18578	4.91005	4.11067	4.63748	4.33365	2.8512	4.60887	4.35131	0.398564	3.96924	4.61725	4.50339	4.76196	5.73481	4.63957	4.86343	4.35932	2.82931
ACTN4	14.9892	15.2659	15.0354	15.2568	15.008	14.4403	14.7221	14.3442	14.6602	15.2774	15.0354	14.9157	14.6399	15.0919	15.0446	14.7629	14.3636	14.2817	15.1892	14.8765	13.7067	15.0354	14.7364	14.9157	15.0446	14.8997	15.008	15.1148	15.2292	15.3912
ACTR10	10.3729	10.5399	10.5279	10.4789	10.1991	10.8117	10.0783	10.4063	10.7371	10.6759	10.543	10.5089	10.6039	10.4126	10.4562	10.5926	10.9451	10.8148	10.7013	10.2999	10.9687	10.3649	10.8618	10.7261	10.5519	10.6589	10.5517	10.4886	10.4704	10.6477
ACTR1A	12.1177	12.238	12.062	11.9394	12.2081	12.4336	12.2558	12.1415	12.367	12.2113	12.1237	11.9455	12.2004	12.2088	12.1432	12.2388	12.0735	12.102	12.4236	12.165	12.023	11.8445	11.8908	11.8161	11.8151	11.8562	11.9108	11.9707	11.9681	11.9124
ACTR1B	11.749	11.8092	11.6939	11.6128	11.8659	12.2446	11.7788	12.0414	12.0262	11.8852	11.7335	11.853	11.8324	11.6946	11.7751	11.6892	12.0822	11.9982	11.9361	11.9463	12.1876	11.6931	11.6942	11.5955	11.6866	11.7425	11.8012	11.7333	11.6972	11.7062
ACTR2	12.6909	12.7243	12.5109	12.6771	12.6801	12.6763	12.6783	12.8091	12.7882	12.7079	12.7226	12.5303	12.8777	12.7879	12.935	12.9391	12.3505	12.8357	12.9785	12.4746	12.4812	12.553	12.5017	12.3851	12.3505	12.4089	12.444	12.3423	12.3882	12.4965
ACTR3	12.0302	12.0848	11.8807	12.0182	12.1387	12.4708	12.1071	12.3019	12.3569	12.1811	12.1097	11.6942	12.4264	11.95	12.4256	12.3631	11.7511	12.3833	12.5425	11.7635	11.9648	11.8132	11.7219	11.6959	11.7397	11.7292	11.7702	11.7926	11.7142	12.1115
ACTR3B	9.11971	9.25658	9.17686	9.04642	9.06573	9.29508	9.29604	9.13622	9.03375	9.47417	9.25535	9.14083	9.24176	8.91899	9.21715	9.20832	9.51632	9.01764	9.36352	9.32845	9.46652	9.02599	9.38101	9.16143	9.17726	9.16698	9.40354	9.18618	9.17356	9.19502
ACTR3C	9.71983	9.31482	9.20304	9.31048	9.31897	9.72173	9.3327	9.30043	9.44565	9.69866	9.38439	9.79402	9.30167	9.39267	9.23556	9.09155	9.76199	9.44186	9.83489	9.78457	9.67955	9.57114	9.91376	9.71717	9.62207	9.62046	9.62867	9.82496	9.56214	9.32786
ACTR5	9.06112	9.33625	9.24394	9.06337	9.13471	9.36372	9.15777	9.329	9.28167	9.2475	9.20973	9.25377	9.40545	9.61293	8.94872	9.39239	9.35505	9.28798	9.16562	9.26257	9.18147	9.08835	9.32805	8.81943	8.93539	9.19842	9.0702	8.95017	9.18553	8.89717
ACTR6	8.04044	7.60097	8.30621	8.07257	7.52593	8.20336	6.99662	7.15574	8.14008	8.37001	8.05054	8.21575	7.69796	8.10584	7.65966	7.73299	8.5632	8.31459	7.97776	7.89524	8.79788	8.96621	8.86119	8.86169	8.8616	8.89631	9.10797	8.52675	8.83177	8.96309
ACTR8	11.1022	11.0682	10.9032	10.9228	10.8996	11.2326	10.907	11.3127	11.244	10.9665	10.9602	10.9431	11.3278	10.7772	10.9401	11.1241	11.4161	10.9106	10.9376	11.1317	11.0786	10.9339	11.1927	10.8848	10.8771	11.0404	10.6919	10.64	10.792	10.8655
ACTRT3	6.56099	7.11055	6.33375	6.5803	6.42836	7.75989	7.10476	6.80906	7.31585	7.06188	7.12967	6.36301	7.18847	6.3739	6.49392	6.33083	7.46542	6.62376	7.51437	6.77257	7.22186	6.26359	6.36598	6.45996	6.4365	6.94357	6.88536	6.62316	6.54787	5.97996
ACVR1	11.6519	11.6767	11.9181	11.6502	11.4143	11.5341	11.244	11.1318	11.446	11.6368	11.654	11.9865	11.7363	11.5456	11.5506	11.3733	11.9467	11.6188	11.5559	11.769	11.893	11.7813	12.0586	11.9816	11.7803	11.7929	11.7301	11.3898	11.8724	11.8504
ACVR1B	12.6783	12.6814	12.7879	12.6499	12.5883	12.594	12.7988	12.4261	12.6239	12.9035	12.7761	12.746	12.4943	12.5896	12.8314	12.7278	12.8009	12.2686	13.0179	12.9001	12.2828	12.8623	12.8929	12.7843	12.9765	13.001	12.911	12.8912	12.8681	12.5179
ACVR1C	5.71365	7.99059	7.41172	6.72133	5.59888	6.37143	5.57743	5.63388	5.86623	6.62535	5.11054	6.84008	7.2381	6.21884	5.55064	5.73197	7.18847	6.06462	6.18839	6.77257	8.09062	7.15781	6.7626	6.88857	6.8859	7.10372	7.00777	7.08169	6.94403	7.10612
ACVR2A	10.3271	10.059	10.2328	10.2861	10.0638	10.1314	10.0059	10.2601	10.4613	10.2714	10.4482	10.1844	10.3318	10.2285	10.1122	10.4278	10.5268	10.5272	9.86354	10.0376	10.9401	10.4294	10.5207	10.3325	10.2913	10.4815	10.2958	10.1032	10.3155	10.2954
ACVR2B	11.3141	10.9836	10.9963	11.1272	11.1496	11.2191	11.496	11.4682	11.1013	11.0682	11.3002	11.1567	11.1606	10.9926	11.2547	11.1527	11.2465	11.208	11.1447	11.2926	11.5651	11.1515	11.4801	11.3455	11.2974	11.5063	11.4393	11.1763	11.1458	10.6743
ACVR2B-AS1	8.17774	8.138	8.56172	8.36557	7.95866	7.97359	7.84764	7.89631	7.36494	7.87986	8.10902	8.82197	7.82084	8.2282	7.58422	7.79224	8.82657	7.9511	7.67202	8.39627	8.24432	8.77738	8.99981	8.63112	8.72412	9.0753	9.0625	8.68879	9.01894	8.48043
ACVRL1	11.414	11.4955	11.371	11.6391	11.6012	11.0192	11.6103	11.5451	11.609	11.549	11.3127	11.2425	11.0211	11.7135	11.5514	11.4074	10.8185	11.4127	11.6337	11.1584	10.8323	11.015	10.5998	10.918	10.8315	10.5402	10.8654	10.8439	10.8295	11.066
ACY1	5.71365	7.05953	7.13308	7.08824	5.83514	7.27692	5.91654	6.68108	6.37087	6.26074	6.02344	7.33821	6.39155	6.52127	6.41004	5.10005	8.2919	6.97157	6.14911	6.93402	7.12953	7.32614	7.11253	7.73732	7.6892	7.63449	8.29165	7.33526	7.73751	7.0455
ACY3	11.145	11.1974	11.7267	11.4482	10.9957	11.7552	9.2182	10.7199	10.3777	11.272	10.9175	11.9519	11.1849	11.309	10.8057	10.3228	12.7256	11.439	9.7649	11.6194	11.819	11.7635	11.6236	11.872	11.7751	11.7868	12.2978	11.6348	12.0888	11.5167
ACYP1	8.34625	7.82231	7.99176	8.04633	8.03225	8.29165	8.36717	7.82902	7.92619	8.03335	8.32868	8.15161	8.08088	7.74036	8.13354	8.00233	8.13224	8.14619	8.13938	8.01106	8.39407	8.49546	8.38725	8.04808	8.2335	8.41121	8.29817	8.32258	8.26651	8.22286
ACYP2	9.26397	9.40312	9.41567	9.24383	9.39313	9.59794	9.44858	9.57594	9.23556	9.37364	9.40067	9.42782	9.47048	9.2557	9.4411	8.97092	9.53927	9.46251	9.35472	9.3154	9.7993	9.40721	9.21901	9.17813	9.4406	9.41463	9.47066	9.32845	9.29639	9.22131
ADA	8.35222	8.38471	7.94424	8.59068	8.71169	8.64899	9.21375	9.48871	8.49359	8.4045	8.42263	7.95757	8.67385	8.87944	8.80667	8.70312	7.71223	8.58221	8.81023	8.26248	8.29505	7.71903	7.78254	7.86026	7.56133	7.49396	7.52233	8.17619	7.46761	7.44378
ADAL	9.38056	8.98684	9.84041	9.33468	8.82754	9.22801	9.00989	8.51079	8.58947	9.41463	8.80671	9.69051	9.23821	8.32712	8.77804	8.77248	9.77708	9.02	9.16821	9.40698	9.90015	9.95678	9.72582	9.54828	9.47406	9.85759	9.89553	9.76986	9.5961	9.25459
ADAM10	12.4087	12.1163	12.0296	12.0609	12.2259	11.9402	12.5242	12.0618	12.3614	12.425	12.4906	12.1205	12.3184	12.1503	12.6275	12.5199	11.7044	12.0454	13.0894	12.0021	11.9046	12.0103	12.132	11.9281	12.0289	12.025	12.0579	11.9737	12.0162	11.9716
ADAM11	5.32325	5.72776	5.80614	6.20381	5.99472	5.76025	6.44101	5.60407	4.60936	5.10728	6.08287	7.0137	4.67932	6.35233	5.55064	5.84464	5.0596	5.45828	5.49652	6.12437	5.56135	6.66123	6.52906	6.79317	6.4365	5.80159	6.76389	6.18839	6.26869	6.30462
ADAM12	10.1877	10.3745	9.36641	9.79352	10.5884	10.3963	11.0839	10.6358	10.7438	9.72987	10.5233	9.12972	10.2067	10.8391	12.0564	10.772	8.95057	9.9255	11.773	9.67483	9.7131	9.05121	8.42222	8.59719	8.94368	8.81041	9.1428	8.83511	9.16725	8.48043
ADAM15	11.8433	12.0929	11.3877	11.7804	11.994	11.9139	12.3589	11.8637	11.8472	11.9328	11.9044	11.4162	11.696	11.991	12.0083	11.8012	11.3459	11.5152	12.2591	11.646	11.6728	11.2382	10.6696	10.9998	11.1217	10.5664	11.0941	11.238	11.2992	11.1796
ADAM17	10.9979	10.8048	10.6619	10.9112	10.9488	10.7199	11.1727	11.0139	10.822	11.0382	10.9369	10.7825	11.0044	10.918	11.0705	11.0198	10.5018	10.838	11.2091	10.8336	10.4252	10.7121	10.8345	10.5276	10.6989	10.6326	10.736	10.8513	10.7245	10.9836
ADAM19	11.004	10.713	9.49285	10.8927	11.3559	10.5018	11.4167	11.6296	10.9216	10.3593	10.6476	9.96602	11.404	11.2992	11.3854	11.3085	8.87982	11.4889	10.776	10.2162	9.87947	8.71867	8.69316	9.54122	9.15548	8.99677	8.57502	9.78283	9.37105	9.63373
ADAM1A	9.61347	9.01125	9.19973	9.25836	9.16003	9.05193	9.57523	9.13983	9.17518	8.97683	9.37622	9.46615	9.19912	9.33709	9.03943	9.47897	9.20169	9.1544	8.8683	9.27165	8.97797	8.93036	9.34823	8.95984	8.9678	9.22385	8.9985	8.87101	8.91964	8.70077
ADAM20	6.6774	6.85097	7.97743	6.86211	6.97604	7.62102	6.99662	7.15574	6.89417	7.97863	8.35831	7.36553	7.85475	7.25014	6.84351	7.48329	7.57385	7.61355	7.85292	7.87338	8.31607	6.96085	8.0174	7.10776	7.29731	7.28648	6.99111	6.90122	7.37268	7.45875
ADAM20P1	6.51257	6.16618	7.58438	6.46355	5.67439	6.10478	6.02553	6.11564	5.89621	7.30127	8.12179	6.60429	6.86719	6.39237	5.9256	6.93963	7.17516	6.89141	7.1606	7.61087	6.9005	6.13509	7.18552	6.73034	6.94998	6.8859	6.3285	6.72224	6.98465	7.10612
ADAM21	5.17572	4.99213	7.06153	5.09392	5.28367	5.50163	5.80614	4.80028	4.73799	6.40569	7.26771	6.42306	6.35385	5.28491	5.82171	6.03521	6.51152	5.93536	7.06983	6.91509	6.34809	5.74772	6.66088	5.84043	6.61904	5.8761	5.5699	5.32168	6.54787	5.63849
ADAM22	10.5724	10.2643	10.5325	10.694	10.7968	10.4187	10.9532	10.4787	10.6037	10.8263	10.7255	10.6196	10.4883	10.6324	10.7096	10.931	10.3758	10.9491	9.99687	10.7735	10.7365	10.4817	10.4462	10.3512	10.4332	10.3559	10.6189	10.2945	10.3668	10.3385
ADAM23	6.84426	6.93659	7.22349	8.17396	7.35831	7.67614	7.49256	6.82491	7.31585	7.16978	6.62316	7.40061	7.41994	7.29081	7.29893	7.34463	6.47356	7.51805	6.06462	7.68114	6.66644	7.28277	7.63916	5.64978	6.6618	6.84426	7.36452	4.92148	7.0286	7.23703
ADAM28	10.3345	9.65167	9.74691	10.5597	10.438	9.88594	10.1653	10.6044	10.3539	9.37105	10.2345	10.353	10.7732	10.5716	10.362	10.9183	9.71754	10.6629	9.48268	10.3212	9.9407	9.99399	9.98507	10.1246	9.70531	10.1533	9.99106	10.0503	9.86232	9.87456
ADAM32	5.5699	6.37605	5.99789	5.64213	4.46683	6.54226	5.83936	5.95507	5.96259	5.79192	6.23181	6.09884	6.49196	5.48316	6.64651	6.72866	6.73034	6.99996	6.16595	5.6537	7.54873	5.7881	5.40646	6.23617	5.72836	6.20734	5.88542	5.2715	6.48342	6.67058
ADAM33	9.08049	9.30043	8.70521	8.94811	9.10687	8.01803	10.0395	8.73743	8.27852	8.64774	8.64742	8.97915	8.43753	9.24603	8.32235	8.44673	7.14409	8.66717	8.28588	8.87702	8.145	7.08938	7.6722	7.89197	7.716	7.16748	6.68378	7.03374	7.15133	8.19743
ADAM8	9.81808	9.81855	9.60549	10.1702	10.6425	9.28167	11.4803	10.4888	10.0363	9.59591	10.1225	9.66997	10.0281	10.727	10.4687	10.092	8.50363	9.80104	9.81733	10.0503	8.84773	10.0115	8.94567	9.5706	9.68723	9.5043	9.26881	9.9027	9.24593	9.60907
ADAM9	12.412	12.6156	12.3478	12.0803	11.9987	12.3452	11.89	12.0754	12.4652	12.6453	12.3809	12.142	12.436	12.1628	12.4853	12.3516	11.9422	12.1097	12.8393	12.1598	12.0704	12.0704	12.1085	11.8161	12.1516	12.2514	12.0951	12.2946	12.0966	12.3994
ADAMDEC1	3.98663	5.56073	3.1971	4.86343	4.88362	3.85609	4.60367	5.84066	5.37697	3.50923	3.60077	2.03277	6.16063	7.05104	5.36803	5.81251	0.402563	6.23861	4.97465	4.13183	4.01726	1.40628	2.44721	1.26631	3.04014	0.436158	3.09112	5.61087	1.12265	2.36515
ADAMTS1	12.5917	13.0036	11.9058	12.26	12.9512	13.4175	13.0224	13.1216	13.0512	13.1953	12.8369	11.7872	13.3951	12.1503	13.4334	12.8888	11.7354	11.9348	15.5715	12.76	11.688	12.0514	11.7508	12.3315	13.167	12.0353	12.4658	12.1725	11.9397	13.068
ADAMTS10	11.1746	10.9081	10.4766	11.1001	11.5514	10.1445	11.8366	11.3596	10.6901	10.4254	11.3983	10.5149	10.8201	11.3356	11.5331	11.3767	9.16349	10.8554	10.7089	10.6526	10.222	10.2261	9.47576	9.99106	9.88417	9.54376	9.67369	9.91832	10.0409	9.84216
ADAMTS12	9.39575	10.1347	9.15118	9.65339	10.4723	9.84256	10.2114	10.27	10.0422	9.50199	9.30817	9.10378	9.64111	10.0272	10.6265	10.3341	9.14763	9.57491	10.1281	9.76279	10.3383	8.33869	8.32163	9.35505	8.37151	8.74515	8.46893	8.85784	9.27751	8.46192
ADAMTS13	9.2696	9.7441	9.69452	9.68927	9.2918	8.33869	9.37425	8.9785	8.91135	9.40473	9.53494	9.83895	8.56518	9.07008	9.54644	9.28619	8.64131	8.30651	9.49821	9.24919	8.59719	9.67969	9.6823	9.64681	9.95648	9.71682	10.1044	9.81431	9.82707	9.43785
ADAMTS14	6.88374	6.74186	5.1523	6.10084	6.55586	6.15739	6.24415	6.90011	6.98285	5.36321	5.5291	4.93646	6.49196	6.3739	8.1257	6.98134	4.24627	5.98376	5.63008	4.78595	6.12328	5.58404	4.71707	5.69287	5.33181	4.79265	5.08884	6.60563	5.73481	4.63347
ADAMTS15	11.2414	11.2383	11.1061	11.6161	10.8512	10.4976	11.6553	10.7823	10.9813	11.1823	11.4891	10.64	9.9076	10.4864	11.2161	10.9816	10.9755	10.7924	10.4045	10.617	11.4624	10.7929	11.0691	10.1147	11.1013	11.1329	10.824	10.5314	12.1834	11.2796
ADAMTS16	11.3584	11.1647	10.9166	11.1107	11.6218	11.16	11.054	11.6631	11.7227	11.4204	11.7461	11.5352	11.6585	10.9662	11.9097	11.0367	10.5786	11.2276	10.3779	10.7491	10.7653	10.7721	10.9014	10.6938	10.7451	10.8117	10.6394	11.3069	10.7109	10.7611
ADAMTS17	8.80436	8.39782	8.61589	8.69994	8.08108	8.03165	8.19099	8.3496	7.85461	8.48981	8.61005	9.5485	7.73381	8.68266	8.28726	7.85504	9.35505	8.12369	7.66311	8.54717	7.00273	9.81481	10.0365	10.3477	10.0039	9.70615	10.294	9.94456	10.2008	8.91065
ADAMTS18	6.1625	5.97394	6.7626	4.67932	6.60356	5.8761	6.41967	5.32096	6.70603	7.45701	6.36761	6.32059	5.40533	6.39237	7.03491	6.03521	6.0627	5.4136	7.30333	6.56341	6.41452	7.07694	6.55319	6.29519	7.90439	7.0612	6.19975	6.51452	6.44886	6.77257
ADAMTS19	7.01658	6.47356	7.33127	6.63984	5.41845	7.58893	3.04014	5.87128	7.06983	8.1598	6.39155	6.88263	6.03684	6.74573	3.79993	6.22333	8.04777	7.2796	6.08703	5.84131	8.17718	8.70822	8.2282	8.07875	8.47412	8.46871	8.27362	8.4288	8.25607	8.5962
ADAMTS2	10.7052	10.8776	10.4472	10.38	11.0542	10.6161	11.089	10.9505	10.5817	10.2028	10.0598	9.62239	10.1529	10.8561	11.5002	10.9258	8.6364	10.52	11.9126	10.2598	10.6567	9.32427	8.26395	9.16368	9.10687	8.74515	8.59834	9.39767	9.30015	9.54533
ADAMTS3	8.52017	8.42646	7.68743	8.19314	9.08387	8.71725	8.22543	8.39951	8.25887	8.63031	8.10902	7.61718	8.23122	7.8837	8.61747	8.73227	7.2915	8.92781	8.78236	7.54847	7.77039	6.74773	7.21264	6.7141	7.66453	6.94357	7.66164	7.54489	7.25783	8.21431
ADAMTS4	6.96652	9.16766	6.80404	7.68057	8.64315	8.51406	7.75797	9.18244	8.12341	9.13944	7.69361	5.55668	10.2502	8.19692	8.60338	9.49704	6.60356	7.35598	10.2478	9.34623	7.29917	8.5875	7.88521	10.4825	11.9813	8.60746	8.84986	10.7895	8.94567	12.2137
ADAMTS5	11.1636	11.0603	11.0687	11.3719	11.8259	11.2011	11.0806	11.6302	11.6769	11.1553	11.0077	10.6653	11.3208	11.12	11.208	11.602	10.8744	11.6767	10.8198	11.1241	11.1223	10.3826	10.3516	10.7541	10.9516	10.8584	10.2298	10.3436	10.9995	10.154
ADAMTS6	8.04777	8.08624	7.88465	7.75295	7.69185	8.03165	7.23318	7.50254	7.70644	7.81225	8.74253	7.0791	7.73381	8.38172	7.65966	8.15144	7.51785	7.5383	7.06983	7.906	7.88124	8.69121	8.09383	7.64832	7.63928	7.53276	7.76358	7.19941	7.58759	7.72856
ADAMTS7	9.57677	9.85305	9.38874	9.1014	9.71933	8.27998	9.41006	9.1162	8.90049	9.37105	9.10121	9.14437	8.35262	9.4124	9.60833	9.0836	8.12239	7.88041	9.75063	9.05598	8.04146	9.08835	8.40259	8.81943	9.11833	8.66902	8.67279	8.68422	9.23684	8.76855
ADAMTS8	7.59152	7.38013	7.30388	7.19554	7.29283	7.66453	7.68667	7.04808	7.2322	7.19779	7.48883	7.60409	7.29209	7.13395	7.8683	6.83932	7.89136	7.35598	6.92254	7.56873	6.01362	7.84987	8.05097	8.30537	8.15943	7.94902	8.81425	8.16559	8.2349	8.35208
ADAMTS9	12.8402	12.888	12.5104	12.7045	12.9491	13.1246	13.0637	12.9063	13.094	13.1158	12.7978	12.5715	12.766	12.3725	13.0481	12.9126	12.7472	12.7534	13.4046	12.7913	12.9242	12.584	12.8119	12.5903	12.8639	12.4507	12.6082	12.4866	12.7839	12.9527
ADAMTS9-AS1	11.916	11.8892	11.9614	12.0378	11.5895	11.6292	11.4453	11.3806	11.9863	12.0709	11.9914	12.3538	11.7467	11.6476	11.8737	11.6927	12.4971	11.5672	11.3904	12.1347	11.8001	12.1878	12.6808	12.3851	12.2619	12.5693	12.6461	12.0138	12.2941	12.1272
ADAMTS9-AS2	10.6715	10.2713	10.4159	10.6589	10.5193	10.3528	11.3779	10.5526	10.3728	10.4204	10.9808	10.9381	10.669	10.6009	10.8671	11.0566	10.9612	10.4098	10.8222	10.7771	10.4297	11.1806	10.9894	11.0316	11.1801	10.7613	11.0472	10.7286	10.8164	10.57
ADAMTSL1	10.4655	10.5168	10.2844	10.6551	11.0991	10.0995	11.2329	10.1805	10.2507	10.6661	10.5631	10.5604	9.91122	11.0478	10.6252	10.6546	10.0913	10.0104	9.93498	10.7142	10.1782	10.8293	10.4784	10.4385	10.9482	11.0067	10.6514	10.5843	10.5781	10.8779
ADAMTSL2	11.927	12.2369	12.0654	11.9007	11.8318	10.6832	12.5251	11.5107	11.5207	12.228	11.541	12.1652	11.1971	12.1952	12.6734	11.9068	10.5597	11.3254	12.4467	12.0815	10.8667	11.349	10.8513	11.8109	11.2645	11.5194	11.0642	11.2192	11.6871	11.1145
ADAMTSL3	11.0739	11.1495	10.9193	11.8652	11.47	11.1355	12.0348	11.4706	11.6779	11.1903	11.1546	11.3492	11.8035	11.8486	11.78	11.7006	10.7089	11.8132	10.5686	11.5938	11.0907	10.8669	11.461	10.4247	11.2763	11.1176	10.5204	10.0322	10.8791	10.5586
ADAMTSL4	10.9042	11.0502	10.4064	10.611	10.7686	9.78864	11.6798	10.3692	10.3076	10.4149	10.6845	10.3443	9.76733	10.8279	11.1748	10.7366	9.06134	9.43225	10.9746	10.3709	9.87427	9.77296	9.36179	10.0627	9.88696	10.3286	9.86341	10.6161	9.85431	11.0572
ADAMTSL4-AS1	8.35875	8.17613	7.95421	7.87623	8.20457	7.96172	8.85619	8.1847	7.87146	8.20379	8.93824	7.99504	7.95023	8.45105	8.30727	8.2989	7.14409	7.48012	8.60796	7.65987	7.91118	7.10417	6.78209	7.84579	7.59869	8.3234	6.94876	8.09221	7.46761	9.16402
ADAMTSL5	6.92113	7.2686	7.04938	7.12871	6.77527	6.46296	7.36179	6.57662	7.42699	7.57475	6.52356	7.29109	6.54787	7.13395	7.12565	7.0462	6.91028	6.40628	6.65655	7.09513	5.97886	7.07694	6.63377	7.65812	7.21047	6.75859	6.26443	7.48117	7.00777	7.57173
ADAP1	9.81808	10.4134	10.4766	10.4528	10.636	10.6004	11.0569	10.6365	10.1575	10.3984	10.3158	10.5693	10.2261	10.4651	10.2338	10.2991	10.6448	10.0542	10.3286	10.683	10.2298	10.8041	10.1717	10.4451	10.4138	10.6768	10.5399	10.5829	10.5385	10.4523
ADAP2	10.8166	11.1573	10.6965	10.7789	11.4902	10.6563	11.3516	11.5107	11.0327	10.6534	10.3959	10.4348	10.6685	10.9025	11.282	11.3227	10.2813	10.9936	10.6362	10.9024	10.869	10.0437	10.0513	10.2552	10.0178	10.0592	9.90696	10.3988	10.1631	9.98448
ADAR	14.3781	14.3442	14.1396	14.2817	14.5957	14.106	14.8435	14.7289	14.4297	14.3084	14.411	14.2617	14.4297	14.6681	14.5278	14.5782	13.9846	14.387	14.387	14.2933	14.2005	14.0922	14.1122	13.963	14.071	14.0415	14.0162	14.2115	14.0434	13.8295
ADARB1	11.3922	11.2084	11.2034	11.5065	11.7808	10.6832	11.5751	11.7269	11.2597	11.2236	11.3904	11.1737	11.2824	11.6509	11.3061	11.7106	10.696	11.4113	11.3719	11.1931	11.1589	10.9222	11.0297	11.148	10.8957	10.9262	10.7744	10.9314	11.0401	11.0697
ADARB2	4.42871	5.87065	4.90099	6.41574	5.8864	6.41147	7.24698	6.4028	6.52584	4.33365	6.75961	6.25796	3.70907	5.37697	6.01953	6.35793	6.14881	5.37082	6.21137	6.12437	4.01726	7.15781	6.47098	6.45996	6.9889	6.61904	6.7403	6.82705	6.39196	6.86561
ADAT1	11.1989	11.2357	10.9078	11.0784	11.3679	11.2475	11.2091	11.3451	11.0825	11.1903	11.282	11.1046	11.2029	11.12	11.2916	11.2645	10.9612	11.1851	11.4549	11.2421	11.3868	10.9274	11.033	10.9866	10.8605	10.8516	11.0023	10.9928	11.044	10.6972
ADAT2	8.74759	8.42646	8.43877	8.41296	8.38019	8.10258	8.39921	8.30169	8.47606	8.48981	8.90479	8.35237	8.31607	8.35978	8.56964	8.461	7.95421	8.40083	8.97418	8.29351	8.15247	8.48203	8.44624	8.18104	8.28433	8.52808	8.17196	8.44847	8.47695	8.26795
ADAT3	8.70102	8.8058	8.65323	8.6424	8.93148	8.08961	9.08339	8.56409	8.15848	8.62544	8.8	8.39976	7.81437	8.71206	8.51202	7.93525	8.33304	7.67993	8.93374	8.80519	7.928	8.51169	8.15247	8.67214	8.9942	8.60181	8.89941	9.07402	8.81978	8.81005
ADCK1	9.09587	9.38507	9.38242	9.24383	9.02013	9.55491	9.20322	9.02258	9.17518	9.26643	9.10483	9.27899	8.96104	9.36641	8.94481	8.91194	9.42303	8.97894	9.44646	9.47162	9.47033	9.5043	9.56418	9.47138	9.5285	9.67235	9.44361	9.40411	9.57993	9.4825
ADCK2	9.98172	9.9589	9.76451	9.74063	10.2171	10.2438	10.2604	10.308	10.2238	9.9588	10.0189	9.70724	9.92802	10.0328	9.80063	10.0469	9.95207	10.03	9.9126	9.96153	10.1036	9.67969	9.67248	9.63714	9.71242	9.86045	9.89294	10.0902	9.91859	9.69071
ADCK5	8.53267	9.04575	8.73103	8.87441	8.89273	8.52214	8.96258	8.82361	8.65363	8.71897	8.72806	8.74612	8.60657	8.90884	8.77293	8.47606	8.60403	8.65294	8.81447	8.90756	8.6157	9.00009	8.67349	8.78965	8.78775	8.92894	8.75178	8.79857	9.01415	8.73779
ADCY1	10.2304	10.0241	10.6233	10.7516	10.1546	9.89132	10.388	11.3648	10.2886	10.8602	10.099	10.5165	9.53129	10.4137	10.1013	10.2597	10.4914	9.95392	9.96563	10.232	10.3477	10.3185	10.2575	11.2238	9.90916	10.3671	10.0871	10.9438	10.252	10.4808
ADCY10	6.36574	6.12266	6.58079	6.48449	6.21231	6.32472	6.34989	6.62471	5.86623	6.48078	6.66524	6.70444	6.72779	6.33083	6.51101	6.77809	7.14409	6.12297	6.78284	6.86755	5.92093	6.68676	7.87076	7.48199	6.78667	7.22025	6.97115	6.26107	7.23862	7.19876
ADCY10P1	9.34789	8.88966	9.25863	9.38755	9.20322	8.61589	9.56593	9.06843	8.6747	9.1046	9.29241	9.35338	9.56364	9.30318	9.14253	9.39239	9.08835	9.25836	9.69452	9.47775	8.76172	9.21213	9.38436	9.37976	8.75664	9.15704	9.05598	8.87101	8.87212	8.84228
ADCY2	8.56798	7.05953	6.27031	6.46355	7.4534	6.96301	7.36179	6.97671	6.89417	6.23617	7.4333	6.017	7.10446	6.05386	7.01275	7.12034	5.49529	8.05267	7.20824	7.02748	6.79186	6.23796	6.2275	5.60407	6.47564	4.89183	6.56099	6.68799	5.41921	6.73716
ADCY3	10.7989	11.0793	10.9938	11.0216	11.2681	10.2958	10.9602	10.9715	10.6901	10.5439	10.6145	10.4655	10.2057	11.1883	11.0917	11.061	9.41485	10.6793	10.9266	10.783	10.2203	10.4929	9.63306	10.4414	10.2308	9.65011	9.91681	10.4934	10.2506	10.3963
ADCY4	11.217	11.5649	11.1767	11.6323	11.3397	10.3431	11.8233	11.2284	11.1173	11.4472	11.167	11.1141	10.468	11.7578	11.2465	11.5289	10.2712	10.473	11.3321	11.1417	10.0361	11.3738	10.6813	11.0234	11.134	10.4983	11.131	10.7502	10.969	10.8481
ADCY5	11.0639	10.8756	10.8303	11.0268	11.0122	10.3007	11.5718	10.8092	10.8334	11.0486	11.3567	11.2129	10.2282	10.9767	11.1086	11.0267	10.561	10.2543	11.4643	11.2396	10.3939	10.834	10.3837	10.8093	10.8238	10.7689	11.2004	11.0428	11.1433	10.6952
ADCY6	12.7502	12.7412	12.4869	12.6748	12.9289	12.2045	13.2057	12.7226	12.6756	12.6651	12.7804	12.5577	12.3648	12.667	12.6965	12.8538	12.1891	12.4313	12.8139	12.7657	12.1652	12.5179	12.4069	12.2505	12.2563	12.3235	12.4048	12.544	12.3764	12.2079
ADCY7	11.6337	11.6353	10.8152	11.6817	12.4681	11.0909	12.9159	12.7463	11.8695	11.0717	11.3443	10.9197	11.9895	12.241	12.3072	12.1455	9.72254	11.8673	11.2703	11.2435	10.9266	10.1577	9.76836	10.2552	9.74605	9.82295	9.93629	10.4634	9.96123	10.2863
ADCY9	12.6119	12.7925	12.7964	12.6108	12.5467	11.8439	12.1506	12.3483	12.342	12.7135	12.4746	12.8115	12.052	12.7338	11.9264	12.4256	12.4163	12.2996	12.2891	12.7032	12.4219	12.7978	12.8385	12.7868	12.9086	12.8712	12.746	12.9474	12.9055	12.8865
ADCYAP1	3.86886	0.704418	5.73857	6.68378	7.16656	4.73941	0.788928	5.09392	5.96259	3.92274	5.16338	5.73244	5.7831	5.58555	4.93316	5.8761	5.36274	5.52823	3.30437	4.84724	5.88734	6.33875	5.24529	4.63467	4.08712	5.65243	6.68378	5.11764	5.73481	5.88469
ADCYAP1R1	6.33828	6.49467	3.92274	5.04079	5.47723	2.54099	5.37697	5.21723	3.81645	4.24059	3.60077	4.60763	5.35853	4.71371	5.51412	5.55796	2.52431	6.79596	4.80238	4.84724	6.87983	2.45159	2.44721	4.18578	2.15825	0.436158	3.09112	4.09245	2.65464	3.95713
ADD1	13.9537	13.9261	13.9567	14.0557	14.0304	13.537	13.9154	13.6889	13.8225	13.9679	14.0103	13.8886	13.687	14.0251	13.9537	14.103	13.5732	13.7724	13.693	13.9241	13.5221	13.9732	13.9761	13.9079	13.8493	13.7577	13.8202	13.8807	13.8578	13.8451
ADD2	5.65738	4.65824	3.53829	4.60936	5.71628	5.16094	6.19071	6.33875	5.67095	4.06154	5.26484	5.1063	6.89353	5.69049	5.10462	5.8761	4.44522	7.16472	6.21137	4.51384	5.56135	3.26121	3.92956	4.82335	4.84413	4.31694	4.40247	3.87915	2.65464	4.13616
ADD3	13.0323	13.0671	13.6798	13.355	12.9794	12.7092	12.396	12.6885	12.9939	13.2048	13.2041	13.5948	13.1905	13.1839	12.9191	13.1696	13.3747	13.0188	12.5632	13.2444	13.1188	13.5547	13.8069	13.5563	13.4482	13.6535	13.6357	13.1327	13.6121	13.3378
ADGRA1	3.77164	5.40646	6.24415	4.54237	5.63388	5.42134	4.5015	4.98946	6.74742	5.1523	4.87509	6.25796	4.18578	4.95501	5.10462	5.60466	6.08669	4.88362	4.80238	7.0841	3.60077	6.97477	6.39237	6.98023	6.1625	6.23473	5.5699	5.2156	5.73481	6.30462
ADGRA2	12.1939	12.1353	12.0138	12.3578	12.8179	11.0516	12.5819	12.0911	11.9033	11.8197	11.9657	11.996	11.5373	12.4874	12.7665	12.2448	10.5691	11.6892	12.232	11.9825	11.1955	11.4133	10.767	11.5745	10.7735	10.8436	10.9262	11.2094	11.2165	10.9436
ADGRA3	11.4823	11.1935	11.274	11.0456	11.1512	11.3167	11.1617	11.1266	11.1734	11.3331	11.2773	11.3092	11.322	11.1298	11.1866	11.2599	11.3376	11.097	11.5639	11.2907	11.4486	11.0826	11.3844	11.1103	11.1002	11.1514	11.3334	11.0527	11.2681	11.1292
ADGRB1	7.80954	7.03461	7.86516	7.97622	7.51179	5.0596	8.21968	7.19266	6.85856	7.92679	7.66311	7.62407	6.66947	7.61233	7.80243	7.57754	5.49529	6.25888	7.22652	7.1533	5.92093	6.53062	6.52906	7.45316	6.84655	6.7109	6.86561	7.00059	7.40061	7.23703
ADGRB2	8.95501	9.29286	9.06406	9.36207	10.158	9.09316	9.69827	9.63057	9.76088	8.70568	9.1573	9.24176	9.25104	9.7345	9.27776	9.29068	7.89136	8.69823	8.2942	9.31172	8.54717	8.55663	7.95757	8.59047	8.07508	8.04919	8.01832	8.59352	8.2349	8.55919
ADGRB3	7.06983	7.22913	6.58079	7.26886	8.00887	7.58893	7.79831	7.48075	7.28569	7.28827	7.97863	6.95982	7.16748	7.21421	7.01275	7.50206	7.24253	7.44418	7.59907	7.20661	7.63928	7.38853	7.79357	7.68057	7.75574	7.16748	7.58659	6.9175	7.79486	7.73769
ADGRD1	8.3879	7.9342	7.59107	7.6285	7.91479	7.18143	8.17594	7.29226	7.94043	7.56467	7.56776	8.22157	7.75989	7.81437	8.77293	7.87367	6.73034	7.79048	8.60196	7.74243	8.07713	7.79048	6.66088	7.50924	7.82861	6.18115	6.47356	7.82003	6.66485	7.37003
ADGRE1	5.76477	5.56073	4.78173	4.75603	5.95883	6.22359	7.84764	7.93493	7.69831	6.62535	6.14264	3.87915	6.65272	6.85643	7.08193	5.8761	5.24194	6.06462	6.02503	5.40865	6.09651	4.08712	5.53365	4.7337	5.33181	2.70815	5.15948	4.98946	4.19666	5.49529
ADGRE2	9.61013	9.72732	8.45407	9.07353	9.79234	9.36997	10.5153	10.172	9.42905	9.72357	8.5635	8.86332	9.63572	10.3145	10.6281	10.294	6.88136	8.92317	11.094	9.52984	8.54717	7.63352	7.4044	8.43201	8.2376	7.43405	7.58659	9.04244	7.51461	8.77337
ADGRE3	2.97938	4.18413	4.54237	3.87915	5.83514	5.84836	8.73596	6.33875	6.62391	5.32016	4.21961	3.75527	6.45594	5.72836	5.48316	4.81022	4.33365	4.88362	5.1442	3.88738	5.22037	4.31828	5.1799	4.18578	4.08712	4.98946	4.40247	3.76738	4.35932	5.75174
ADGRE4P	5.5699	5.83852	5.1523	6.33875	6.08876	5.65949	7.49256	8.00962	7.51574	3.37114	6.41618	4.93646	6.18391	7.12371	7.46721	7.29731	4.87722	6.78592	3.30437	5.15136	6.84272	5.2262	5.31155	5.25204	4.67254	5.1327	5.45688	5.79317	3.08186	3.79573
ADGRE5	11.6616	12.0691	11.6265	11.8243	12.2678	11.3343	12.7063	11.7985	11.7072	11.7022	11.5594	11.3767	11.7593	12.2038	12.3206	12.1053	10.0258	11.6284	11.9985	11.7492	10.4438	10.7606	10.0453	10.6269	10.2684	10.6479	10.1078	10.9277	10.8076	10.8291
ADGRF1	11.4171	10.8243	10.5227	10.4839	10.8718	10.8953	12.0219	10.2913	11.2037	11.9943	11.3666	11.0058	10.1427	10.9012	11.3323	11.5535	10.3551	10.0696	12.3789	10.8199	9.9214	10.756	10.9703	10.7651	11.3868	11.0739	10.9296	11.5075	10.9995	11.1397
ADGRF3	9.04925	8.00038	7.99996	7.94471	8.21307	7.75989	8.2335	8.1055	8.12341	8.63031	7.95697	8.28209	7.71751	7.85292	8.7265	8.21618	7.68658	8.00205	8.18504	7.85389	7.26886	7.80525	8.34192	7.61233	7.90439	7.87338	7.8743	8.50059	7.8466	8.19743
ADGRF5	13.3734	13.524	13.657	13.3751	13.2504	12.7167	12.1905	12.7143	13.2516	13.7475	13.6761	13.6798	12.4866	14.0776	12.4965	13.6583	13.0567	12.7397	12.5385	13.0642	12.8678	14.2817	13.7843	13.9679	14.0528	14.0802	13.5748	14.2382	13.9371	14.013
ADGRG1	15.0265	15.4597	14.924	15.1768	15.2168	14.6457	14.8841	14.3214	15.008	15.8026	15.4754	14.9892	14.9976	15.0686	15.017	14.8435	14.1365	13.8835	15.8026	15.1022	13.9458	14.7699	14.7154	14.5664	14.9337	14.9076	14.9418	15.0265	14.8362	14.924
ADGRG2	7.86241	8.02275	8.43877	8.89339	8.51446	7.67081	7.59517	7.87367	8.24258	7.46598	9.05552	8.15161	8.12089	8.66951	8.02699	8.40645	7.43303	9.30133	8.07077	7.82412	7.72676	7.95568	8.3068	8.33407	7.75574	7.78582	7.69796	7.97686	7.55805	8.30205
ADGRG3	5.39328	5.6916	6.47438	4.49576	5.76193	5.20982	8.87212	6.60694	6.44327	6.75961	6.5803	6.44699	5.16094	5.96034	6.30462	5.91501	5.44306	5.60923	6.43954	6.15758	5.69049	5.61918	6.14264	5.94614	6.26188	6.00247	4.9903	5.61087	6.39196	6.75452
ADGRG4	2.29093	5.15136	0.945074	4.31962	3.33136	4.67496	2.35352	4.55192	4.31828	1.97649	3.7857	3.99247	2.99865	4.43732	0.399364	3.20749	0.876176	3.22495	2.76477	3.10536	4.01726	0.788928	2.44721	3.57024	0.404163	1.65463	2.58224	2.37677	2.65464	3.79573
ADGRG5	10.9523	11.0987	11.2484	11.025	10.6938	10.3861	10.4822	10.6054	10.6954	11.263	10.8695	11.099	10.84	11.2992	10.1141	10.1658	10.5512	10.0399	10.3269	11.4864	10.3132	11.1323	10.5207	10.7322	10.5997	11.1533	11.0247	10.7358	11.4102	10.5607
ADGRG6	11.2373	11.2349	11.2484	11.1408	11.3215	11.3516	11.282	11.3625	11.3202	11.4902	11.5087	11.6196	11.5592	11.445	11.223	11.5662	10.8299	11.1952	11.0447	11.1433	11.7297	11.3948	11.1285	11.1845	11.221	11.1605	11.5026	11.4503	11.2907	11.4641
ADGRL1	11.8718	11.8298	11.5442	11.8756	12.2785	10.7163	12.8036	11.9457	11.7461	11.742	11.8855	11.5876	11.0338	11.9251	12.1596	12.0008	10.2877	11.2106	12.2197	11.8397	10.5626	11.2803	10.978	11.2132	11.2603	11.1084	10.9826	11.5082	11.238	10.9971
ADGRL2	12.3957	12.1318	12.1888	12.1062	12.2164	12.0973	11.7499	12.2214	12.4267	12.3906	12.3489	12.1328	12.2128	12.4711	12.228	12.4815	12.1936	12.1739	12.1394	12.2546	12.0622	12.275	12.4332	12.2607	12.3859	12.3906	12.1202	12.3013	12.3992	12.4239
ADGRL3	8.85964	8.26795	8.46837	8.80495	8.59201	8.35771	8.04185	8.49116	8.30961	8.41253	8.53773	9.16725	7.91591	8.83813	8.2965	9.3502	8.84949	8.47383	9.48268	7.76047	8.31607	8.39891	8.86516	8.97915	8.31408	8.05808	8.69831	7.98693	8.59939	8.55333
ADGRL4	8.95501	8.43171	8.81286	8.83625	8.04808	7.72676	8.91286	7.73175	8.45986	8.9394	9.42695	8.47582	8.17153	9.05711	8.83511	8.71917	8.41515	7.85706	9.54658	8.13825	7.85606	9.29005	9.14005	8.90884	8.73051	8.94504	8.97222	8.7531	8.9297	9.31661
ADGRV1	10.3345	9.56801	9.99068	10.2422	9.72568	10.0394	10.7917	9.7318	9.82726	10.3953	10.678	11.0034	9.35318	9.9811	10.27	9.9221	11.8514	10.0085	10.8591	10.7066	9.35594	10.3728	11.6809	10.4695	11.0292	10.7066	11.1875	10.447	10.9234	9.25787
ADH1B	12.4168	13.0349	12.584	12.6351	11.7301	11.9929	12.6499	12.7679	12.5231	11.3207	11.577	12.0941	12.8553	12.6275	12.2441	12.9242	11.697	13.104	12.3486	12.4841	12.6219	11.3827	10.7575	12.071	9.4242	10.4526	10.9001	10.447	11.0276	10.6296
ADH1C	9.09587	9.01528	9.82253	10.1996	8.45332	9.6065	9.62953	9.39985	10.6748	7.31339	9.73488	9.40428	8.91324	9.31482	9.40657	10.0261	9.84867	10.7668	6.52127	9.47162	10.0961	9.27579	9.52022	8.16559	8.77656	9.19842	8.69244	8.1477	8.4253	8.75085
ADH5	12.1275	12.2058	12.7559	12.3873	12.033	12.9258	11.5345	12.3062	12.5544	12.2326	12.2361	12.6596	12.6741	12.3359	11.9344	12.1455	13.2265	12.8467	11.6684	12.5369	13.149	12.7329	12.9612	12.8771	12.6499	12.7739	12.7191	12.4708	12.6496	12.6439
ADH6	10.3571	10.5665	11.4718	11.1107	10.08	10.8563	8.89358	9.57345	10.1898	10.6086	10.5642	11.6343	10.8116	10.876	10.0082	10.1329	12.0656	10.6081	9.04859	11.1086	10.7138	11.6621	11.9885	12.1339	11.7182	11.8985	11.8662	11.4074	11.8592	11.7539
ADHFE1	10.2324	10.1557	10.7415	10.3001	9.8234	9.87635	9.79434	9.5558	9.93217	9.88147	10.2258	10.9039	9.8481	9.97672	9.71983	10.0892	10.6287	9.95954	9.42804	10.3318	10.263	11.0002	10.8591	11.0561	10.9452	10.9133	11.0381	10.7684	10.6619	10.5167
ADI1	12.8585	12.8079	13.6944	12.8153	12.4261	13.2553	11.4792	12.5189	12.935	13.1111	12.8835	13.1579	12.781	12.7949	12.0193	12.6129	13.805	13.7907	12.0037	13.2048	14.4804	13.2935	13.6261	13.5748	13.545	13.5668	13.4774	13.2275	13.5848	13.6776
ADIPOQ	7.21322	10.7937	6.33375	7.71252	0.876176	0.397764	5.15412	0.645283	0.539065	0.397764	0.397764	3.24497	3.89947	8.24325	0.399364	0.397764	0.876176	3.92274	6.45594	7.82412	9.8347	0.404163	1.19149	1.26631	0.404163	1.65463	1.61608	0.397764	1.12265	0.746673
ADIPOR1	11.9973	11.963	12.0117	11.9226	11.8786	12.5699	12.8131	12.2023	12.2441	12.1121	11.9183	12.0609	12.1863	11.9082	11.9169	12.0434	12.5754	12.3759	11.8816	12.0272	12.6358	11.978	12.1575	12.1018	12.1598	12.1304	12.0801	12.1263	12.1326	12.1643
ADIPOR2	11.6564	11.6253	11.5375	11.3809	11.5462	11.6798	11.7404	11.6408	11.7185	11.6743	11.4471	11.5401	11.5755	11.6049	11.5609	11.647	11.614	11.7226	11.7115	11.6542	11.6575	11.5539	11.679	11.5512	11.6054	11.5804	11.4555	11.6682	11.4568	11.744
ADIRF	11.6134	11.5897	12.1964	11.7325	11.5585	12.2285	11.5666	11.9388	11.3393	11.1046	11.5735	12.3039	11.9951	11.4549	11.14	11.6049	12.9969	12.8835	10.0178	11.8151	13.6535	12.2654	11.4719	12.3614	11.2141	11.4577	12.639	11.2977	11.8398	11.1595
ADK	9.75823	9.66852	9.96487	9.88259	9.49771	10.082	9.89919	9.88783	9.92949	10.0386	9.80582	9.8963	10.0866	9.71217	9.76182	9.77808	10.2341	9.97243	10.1593	9.9225	10.1193	10.1055	10.1101	9.93986	10.1064	10.0619	10.0458	9.88206	10.0377	10.1526
ADM	9.45084	9.94908	10.244	9.8738	9.04847	10.1747	8.38695	9.33565	9.89798	10.7745	9.4993	10.3197	9.17866	10.1152	9.3379	8.94976	10.8003	9.65339	10.224	10.292	11.0002	10.4807	10.1487	10.8813	11.9263	11.035	9.97454	11.3409	11.0035	12.0054
ADM2	11.3358	11.8974	12.0588	11.9802	11.3866	11.1951	10.8389	10.9253	10.9152	11.6292	11.5291	11.9822	11.3148	11.6272	10.7596	10.9947	11.9666	10.8831	10.6128	11.9745	11.1939	11.4564	11.9861	11.9367	11.7109	11.8655	11.8404	11.9603	12.1736	12.1367
ADM5	6.88374	7.20023	7.31909	7.51152	7.56873	6.99059	7.67506	7.2686	6.84112	7.40397	7.4992	7.58794	7.39923	7.55157	7.30754	7.48329	7.38853	6.98531	8.05674	7.63891	6.45365	6.84173	6.63377	7.28188	6.80738	6.26188	6.97115	7.48117	6.41883	7.53264
ADNP	12.8006	12.6108	12.5606	12.6828	12.8068	12.5142	12.9303	12.7679	12.766	12.6204	12.8674	12.701	12.8175	12.6596	12.8553	12.9425	12.4606	12.8006	12.8226	12.6709	12.5584	12.5339	12.6593	12.4809	12.3701	12.5109	12.4925	12.3394	12.4417	12.4378
ADNP-AS1	6.96652	6.98822	6.87825	7.17768	7.07413	6.72504	7.20294	6.87365	7.0223	7.44932	7.57743	7.44418	7.39923	7.2322	7.13831	7.03305	7.44418	6.78592	7.35977	6.99269	7.44231	7.38853	7.24481	7.71639	7.87404	7.44776	7.61463	7.22618	7.00777	7.94821
ADNP2	11.1989	11.3146	11.1049	11.1153	11.2056	11.1475	11.2515	11.2949	11.1364	11.1803	11.1708	11.058	11.1252	11.1553	11.0886	11.2498	11.4204	11.193	11.1632	11.2968	11.4639	11.0338	11.3631	11.2845	11.3886	11.2253	11.2495	11.324	11.1682	11.5035
ADO	10.1647	10.2193	10.1379	10.0774	10.1304	10.3473	10.2289	10.0505	10.0394	10.3103	10.0242	10.034	10.2921	10.0196	10.2003	9.85524	10.2311	10.139	10.2814	10.0647	9.78283	10.0761	10.158	10.1414	10.0115	10.244	10.1858	10.2359	10.145	10.2889
ADORA1	9.5861	9.57013	9.09678	9.51819	9.55388	9.71857	8.45253	9.90264	9.90696	10.1928	9.4993	9.20593	9.50453	9.24603	9.09094	8.70874	9.53722	9.60999	9.82387	9.25719	10.1782	9.6079	9.45084	9.25459	9.13696	8.62438	9.23491	9.43733	9.68032	8.76051
ADORA2A	5.98106	6.54355	6.84222	6.8146	5.5531	4.98441	5.94218	6.42105	4.86185	5.87001	6.20094	6.88263	5.56592	6.49416	5.48316	5.7768	6.52906	5.74055	5.85796	6.80722	5.72836	6.90643	6.83693	6.81718	7.18445	6.96799	7.00777	7.00059	7.32231	6.75452
ADORA2A-AS1	9.68812	9.78052	10.7529	9.87138	9.11606	9.19842	9.102	8.64274	8.72786	9.08177	9.39781	10.8747	9.63119	10.0051	9.24228	8.94651	10.5474	9.31123	8.63895	10.333	9.93492	10.376	10.4865	10.6181	10.3695	10.4914	10.6628	10.3707	10.7245	10.2463
ADORA2B	6.73654	6.5245	7.08718	6.89202	7.33178	7.43646	5.99789	7.01144	7.2322	6.4963	7.32085	6.60429	7.29209	6.92843	7.37747	7.27321	6.76699	6.87623	7.75305	7.18469	7.77039	7.10417	7.45005	7.13724	6.9889	6.38966	7.20161	7.21322	6.80271	4.49962
ADORA3	4.9903	5.87065	6.68834	4.97816	6.29519	5.16094	6.05434	6.80906	5.79317	5.06969	4.62576	5.8747	6.4167	5.70498	5.55064	7.29731	5.30369	6.96085	6.33375	6.26528	6.12328	5.09899	5.02712	4.18578	4.93467	3.84476	3.904	6.03765	4.96833	3.95713
ADPGK	10.9006	10.8059	10.8367	10.9541	11.0669	11.1192	11.1972	11.2134	11.1389	10.8184	11.0063	10.889	11.2504	11.1879	11.1821	11.1783	10.9833	11.1046	11.0479	10.8362	11.0852	10.7978	10.9482	10.785	10.7646	10.7893	10.6843	10.7817	10.6312	10.788
ADPRH	8.82739	9.22281	8.93517	9.12163	8.95465	9.22165	8.97137	8.9985	9.23556	8.89119	9.21346	8.74612	9.21213	9.31482	9.27776	9.24552	8.58269	8.98124	9.5567	8.96435	8.35222	8.79763	8.7943	8.69177	8.77248	8.76675	9.0025	8.95378	9.03608	9.04835
ADPRHL1	7.84153	6.6007	6.68834	6.59989	6.69697	6.89333	7.20294	6.47914	6.85856	7.25087	6.68378	7.10806	6.35385	7.07398	6.79635	6.81536	7.64792	6.90643	7.28277	7.36369	6.75171	6.86211	7.27262	6.55087	6.59404	7.22025	6.79497	6.90122	6.71452	6.64319
ADPRHL2	9.96133	10.3086	10.1434	9.82201	10.186	10.6333	9.9255	10.3355	10.2203	10.2101	9.85587	9.98007	10.2001	9.87152	10.0102	10.0446	10.5018	10.1444	10.2852	10.2027	10.6933	9.64465	9.91845	9.6222	9.82941	9.83957	10.02	9.93202	9.81214	10.0791
ADPRM	7.75574	7.66287	7.58438	7.84641	7.86036	8.35222	7.69402	7.74149	8.40972	7.75536	7.77387	8.26208	7.93976	7.63739	7.57666	8.18347	8.15917	8.70312	8.20987	7.76635	8.50363	7.69112	7.97019	7.4178	7.92832	8.15917	8.07141	7.17061	8.14619	7.8683
ADRA1A	7.17368	6.6007	7.8466	7.74243	7.25365	6.19707	6.14881	6.70825	5.67095	7.33921	7.0137	7.66928	6.86719	7.11544	5.15042	7.6722	6.29074	7.66905	6.57863	6.15758	6.34809	8.31431	7.80467	8.31885	7.39237	7.80872	8.1148	7.85461	8.33239	7.70042
ADRA1B	8.0671	8.66517	9.60867	9.12644	8.18162	8.17396	8.01784	8.2376	8.46422	8.1521	7.4992	9.40428	8.03576	9.3083	7.73695	8.22882	9.14512	8.71228	7.15165	8.54393	8.94307	8.89941	8.56814	10.0729	8.37151	9.12911	8.67279	8.88294	9.1967	9.20525
ADRA2A	9.91311	9.9078	9.23201	10.4114	10.914	8.83741	11.0629	10.1132	10.6037	8.74983	9.79068	8.81174	9.68875	10.6962	10.8763	10.5436	7.95421	9.02353	9.45259	9.34823	9.35594	7.58532	7.79357	8.22069	7.73299	7.22025	8.04398	7.87733	9.1967	7.64832
ADRA2B	7.5684	7.96172	8.75061	8.02877	6.50588	7.28902	7.83597	6.06767	7.71751	8.22588	7.51805	8.82739	6.59989	8.49777	7.74392	7.86283	8.26476	7.21223	8.03021	8.26874	8.09905	8.78673	8.04125	9.36372	8.1075	8.49205	8.24011	8.38695	8.21541	8.59026
ADRA2C	10.0157	9.24809	9.79402	9.98568	10.537	10.5717	9.49356	11.1778	9.2725	10.0658	9.18982	9.37648	10.504	9.09703	8.46236	9.8723	9.57085	10.9068	10.2852	10.0967	9.67708	9.47018	8.74307	9.33964	9.4357	8.95829	8.78236	9.71242	8.22543	9.73058
ADRB1	7.14769	7.8466	7.41172	6.77995	6.57863	6.41147	5.54391	6.53579	6.99933	7.41518	6.62316	7.47938	4.40819	7.24078	5.61485	6.37911	7.37683	6.38966	5.32096	6.77257	6.68568	7.86558	6.70973	7.7056	8.43042	8.48447	7.85873	7.71576	7.93976	7.55551
ADRB2	8.85382	8.52044	7.37349	8.19957	9.25637	8.66407	9.26155	9.3874	8.72275	8.02469	8.65191	7.31681	8.49777	8.37217	9.2136	8.59087	7.10806	8.64619	8.42429	7.87338	8.45319	7.24802	6.55319	7.08718	6.90938	7.20234	6.84426	6.70603	7.13308	7.41186
ADRM1	11.4852	11.591	11.4822	11.478	11.4521	11.7635	11.136	11.62	11.5236	11.597	11.287	11.5164	11.3342	11.2931	11.3139	11.2256	11.5356	11.3088	11.6536	11.4879	11.3884	11.2633	11.0669	11.1512	11.2912	11.1417	11.3707	11.6049	11.4628	11.4179
ADSL	10.8611	10.787	10.6586	10.5939	10.8011	11.4285	10.6324	11.1573	10.9293	10.7345	10.6597	10.7516	11.0478	10.5636	10.7449	10.7155	11.1484	11.0979	10.9736	10.7854	11.4675	10.5415	10.6666	10.5954	10.574	10.5534	10.4745	10.3961	10.6232	10.5207
ADSS	10.4155	10.3012	10.4009	10.4266	9.95123	10.3105	10.286	10.1874	10.4151	10.3841	10.5651	10.3878	10.4364	10.2517	10.4508	10.3781	10.5365	10.294	10.7578	9.96749	9.92341	10.6117	10.6509	10.5332	10.6544	10.7108	10.6501	10.3436	10.5247	10.5541
ADSSL1	10.3321	9.88323	10.6569	10.0437	9.1203	9.9078	8.81331	9.13622	9.17518	9.0351	9.25175	10.5531	9.6222	9.99215	8.83057	9.21715	10.466	9.85939	8.78052	10.014	10.2509	10.8587	10.6972	10.9003	10.6806	10.7893	10.6358	10.3406	10.6722	10.9494
ADTRP	6.69536	6.97477	6.55748	6.8146	7.12315	7.18143	6.6651	6.68108	7.55654	8.04865	7.2004	6.52425	6.88198	6.91462	6.27488	6.63071	6.52906	7.35598	5.4143	7.12371	7.04318	7.97776	6.66088	7.7056	6.82724	7.80872	6.41618	8.13439	7.38827	7.21629
AEBP1	14.4272	14.1879	14.1542	14.4162	15.3912	13.6558	14.5167	14.5042	13.993	14.0802	14.1005	14.1396	14.1208	14.6602	14.9418	15.3319	12.1581	14.3309	14.7154	14.1292	13.2815	12.8432	11.875	13.2666	12.5447	12.8283	12.3812	13.1568	13.1579	13.0161
AEBP2	10.8333	10.6216	10.8434	10.8906	10.6625	10.6035	10.8431	10.7981	10.8823	10.7791	10.8352	10.8778	10.8161	10.7914	10.7185	10.7978	10.9383	10.8166	10.7994	10.7036	10.567	11.0178	11.1845	10.9675	10.9911	10.94	10.9813	10.8363	10.9422	11.0587
AEN	10.0803	10.601	9.58547	9.64653	10.2187	10.4299	9.78351	10.0068	9.92949	10.4204	9.84296	9.36179	10.3334	9.6695	9.76182	9.96498	9.49936	9.93786	10.5567	9.81387	10.2183	9.102	9.05766	8.68677	9.36207	8.78396	8.9422	9.46547	9.13471	9.7661
AES	13.4482	13.5388	13.0613	13.4569	13.5965	13.742	13.5821	13.8974	13.7105	13.545	13.2021	13.2229	13.6261	13.3631	13.4714	13.3647	13.177	13.756	13.3709	13.4774	13.3402	12.9949	12.6609	12.8856	13.1288	13.0846	13.1873	13.153	13.2733	13.0472
AFAP1	11.4094	11.3585	10.9311	11.0549	11.7868	11.2132	11.6718	11.508	11.432	11.3669	11.2465	10.8996	11.2256	11.2182	11.6089	11.6076	10.3125	11.3653	11.8043	11.1534	11.0139	10.6514	10.7979	10.4053	10.7545	10.5328	10.5051	10.857	10.5216	10.7147
AFAP1-AS1	7.43834	7.34063	6.86211	7.36739	7.72808	7.54489	7.75797	7.17964	7.46542	7.43501	7.39086	7.06454	7.38785	7.35885	8.04334	7.79224	7.01629	7.20206	8.12886	7.23984	5.79529	7.14633	7.22807	6.96049	7.83631	6.98798	7.02905	7.66958	7.15133	7.23703
AFAP1L1	10.6395	11.1334	10.4441	10.267	10.1672	10.1675	10.177	10.2513	10.5721	10.5979	10.4681	10.5281	10.4506	10.6353	10.1072	10.352	10.2813	9.98999	11.0832	10.3072	10.1796	10.4421	10.2803	10.2375	10.2664	10.0609	10.2675	9.95622	10.3469	10.4129
AFAP1L2	11.2641	11.2307	11.2926	11.6693	11.7552	10.9007	12.2315	10.9921	11.7863	11.633	11.859	11.5506	11.0112	11.6688	11.8072	11.6836	11.2765	11.3282	11.6305	11.334	10.6695	11.6223	11.436	11.13	11.1595	11.3521	11.1343	11.0658	11.2576	11.0004
AFDN	13.6667	13.5668	13.4973	13.4609	13.5001	13.5319	13.7815	13.5579	13.5718	13.4609	13.7309	13.5732	13.5635	13.5594	13.3781	13.7428	13.4728	13.5333	13.4531	13.5563	13.4463	13.6761	13.8153	13.6704	13.7475	13.4928	13.6493	13.7293	13.6017	13.7455
AFDN-AS1	7.03338	7.34063	7.68743	7.15341	7.00421	7.09188	6.94199	7.07836	7.08247	7.02322	7.21656	7.59759	7.01942	7.11544	7.00322	7.05911	7.58613	7.0317	6.71809	6.77257	7.09816	7.97776	7.71223	8.36668	8.4056	8.01909	8.12341	8.44847	8.25607	7.76098
AFF1	14.3964	14.2468	14.2304	14.4204	14.4643	14.2081	14.6952	14.2744	14.4247	14.7426	14.7496	14.2579	14.4247	14.4491	14.4751	14.6018	13.9515	14.1122	14.6399	14.2854	14.0825	14.4061	14.7496	14.3964	14.7023	14.3265	14.3356	14.6681	14.2984	14.5782
AFF2	7.49835	7.66287	7.26686	7.84641	7.99009	8.39831	8.54626	8.36416	8.34455	7.36198	7.92619	7.89136	8.83887	7.57854	7.8683	8.04304	6.96572	7.9511	7.78845	8.03271	8.37001	6.60408	6.63377	7.1239	6.30462	7.43405	6.63899	6.84351	6.54787	7.63701
AFF3	10.6832	10.6718	10.4216	10.9016	11.6278	10.428	11.1164	11.7872	11.2662	10.2194	10.4575	10.3878	11.0882	11.0152	11.1641	11.3034	10.0484	11.5187	10.1021	10.4416	10.7351	9.59643	9.02548	10.2694	9.4357	9.60193	9.2818	9.74678	9.84026	10.0296
AFF4	13.4994	13.4686	13.4334	13.4888	13.4362	13.4482	13.3951	13.4659	13.5803	13.5482	13.5579	13.4509	13.5594	13.3721	13.386	13.6057	13.3595	13.5621	13.3816	13.4714	13.4804	13.4376	13.5718	13.5205	13.5402	13.4853	13.4188	13.659	13.4761	13.8178
AFG3L1P	10.694	10.4859	10.3695	10.4053	10.4824	10.1284	10.8529	10.3261	10.3076	10.5159	10.606	10.4302	10.287	10.5704	10.5006	10.5845	10.209	10.1059	10.8211	10.5534	9.90826	10.2992	10.4666	10.2162	10.2819	10.3967	10.3646	10.5326	10.4224	10.3767
AFG3L2	11.9782	12.1136	12.1589	11.861	11.8208	12.26	11.6837	11.7912	11.9745	12.0668	11.8361	12.0123	11.9784	11.7694	11.7938	11.5772	12.4768	12.088	11.9761	12.1173	12.1888	12.0382	12.3869	12.1455	12.1827	12.1672	12.2573	11.9478	12.2327	12.1462
AFM	10.79	10.6244	12.5309	12.0811	9.34323	9.64171	6.24415	8.65533	10.2042	11.6068	10.797	12.2135	9.63119	11.5148	9.05706	9.83346	12.7755	11.0987	7.57743	10.9024	11.3959	12.8802	13.0388	12.9171	12.0461	13.0036	12.5943	12.8086	12.1251	12.4618
AFMID	12.0929	12.228	12.8844	12.4988	11.9834	12.372	12.1565	11.5609	11.629	11.9854	12.027	13.0755	12.2347	12.6082	12.0654	11.8382	13.3781	12.5024	11.5639	12.9805	12.9051	13.0866	13.0369	13.1246	12.8908	13.174	13.0085	12.4387	13.0969	12.8698
AFTPH	11.8097	11.649	12.254	11.9519	11.5023	11.6663	11.6639	11.6951	11.6747	11.8384	11.8868	12.2885	11.9367	11.7411	11.8048	11.6212	12.3519	11.9108	11.5147	11.9311	12.031	12.218	12.505	12.2443	12.1524	12.3121	12.3478	11.982	12.1917	12.4721
AGA	9.08835	9.5561	9.38242	8.93388	8.89743	9.49285	7.82046	9.22887	9.40764	9.36283	9.13983	9.36947	9.39226	9.2397	9.48571	9.37395	9.46652	9.52377	9.38496	9.58464	9.71633	9.7264	9.32805	9.28103	9.19196	9.76986	9.45376	9.52136	9.30015	9.6406
AGAP1	12.8108	12.7596	12.9881	12.7964	12.6998	12.4773	12.4404	12.657	12.6139	12.6537	12.6693	12.8774	12.5148	12.5672	12.5097	12.777	12.7171	12.6132	12.4113	12.9651	12.826	12.7243	12.9458	12.911	12.9721	12.973	12.9993	12.9886	13.0811	12.766
AGAP1-IT1	8.47031	8.85258	8.48131	8.3024	8.32156	8.24264	8.32212	8.41969	8.42925	8.49571	8.25287	8.81626	8.2006	8.52808	8.34113	8.48625	8.80752	8.25704	8.48556	8.7443	8.54717	8.88019	8.87254	8.5401	8.87801	8.61747	8.60905	8.62984	9.02427	9.31123
AGAP11	8.62604	9.01828	9.39675	9.12163	8.72503	7.91022	9.03958	8.49978	8.47012	7.9374	8.8446	9.02851	8.43753	9.06037	8.08155	8.95277	8.33751	8.56655	7.9195	8.89095	8.08201	9.3389	8.65363	9.3906	8.71169	8.41121	9.22121	8.52148	8.41189	8.96668
AGAP12P	7.67091	9.31103	8.67949	9.30015	7.37053	8.45737	8.52063	8.84001	9.01415	8.83813	8.09303	8.79368	5.44522	8.44002	6.92174	8.36301	8.98256	8.15505	9.34019	9.00009	9.55059	9.68649	8.93019	7.40592	8.80404	9.58223	9.54414	8.77534	9.51054	8.86468
AGAP2	8.97092	8.77753	8.0577	9.18639	9.64075	8.03802	9.70084	9.5596	8.60028	7.86241	8.66482	7.80525	9.20238	9.58656	9.58619	9.13105	6.16595	9.23522	8.52628	8.73779	7.37375	7.42386	5.9728	7.31037	6.45365	6.49416	6.29624	7.24253	6.48342	7.45875
AGAP3	11.4469	11.5772	11.2939	11.5522	11.6619	10.9787	11.7601	11.5123	11.1746	11.3709	11.3605	11.4907	11.2282	11.623	11.4557	11.2857	11.1228	10.9084	11.3889	11.5461	10.9561	11.2841	11.2894	11.4757	11.4939	11.3178	11.5478	11.5826	11.5421	11.3097
AGAP4	7.42563	7.31305	8.2948	6.77995	8.06065	7.26686	7.75797	8.3496	8.32212	7.44932	7.82412	8.22157	7.68267	8.23526	7.71252	7.32496	7.25644	8.04801	8.30259	8.16326	8.16198	8.81089	7.74589	7.59977	8.31408	8.66902	7.98693	8.35127	8.40493	8.1741
AGAP5	8.97092	8.71632	8.78554	9.04642	9.01415	8.28526	9.08778	8.85735	9.00861	8.97683	9.11639	9.04903	8.60657	8.97704	8.83511	9.04226	9.1924	8.61995	9.04618	9.06022	8.3879	9.02376	8.95709	8.98814	8.88955	9.21332	9.19212	8.79857	9.2196	8.53322
AGAP6	9.72732	9.96875	9.42825	9.75049	9.58223	9.15252	9.83583	9.62699	9.49285	9.68905	9.6719	9.75964	9.67105	9.76	9.73998	9.50711	9.27074	9.23945	9.82387	9.82733	9.21375	9.71466	9.80485	9.61658	9.82238	9.70615	9.73747	9.60056	9.7812	9.70547
AGBL2	7.4506	7.40755	6.7403	7.73114	7.37053	6.89333	7.27442	7.53391	7.18037	7.09941	7.94043	7.4249	7.25365	7.19416	7.70421	7.35526	7.24253	7.18186	7.61939	7.26122	6.25089	7.89612	7.80467	7.21601	7.76807	7.67916	8.12341	7.50428	7.48248	7.33425
AGBL3	8.11438	7.63823	8.08756	8.32367	7.63449	8.08961	7.93209	7.75678	7.76028	8.1521	7.9195	8.27567	8.23879	7.80929	8.20537	8.05192	8.4238	7.96621	8.02162	7.98944	7.67484	8.48727	8.26795	8.02476	8.04711	8.3945	8.71877	7.59197	7.92742	8.05617
AGBL4	7.90344	8.39158	8.48131	8.26651	7.72808	8.64099	7.97706	8.09221	8.28309	8.04865	8.46422	8.32657	7.964	8.10114	7.78254	7.65282	8.74825	8.13224	8.36687	8.38772	8.81117	8.85474	8.96072	8.83839	8.88955	8.88128	8.51599	8.6252	8.79138	8.66069
AGBL5	11.6564	11.7226	11.5918	11.5735	11.6634	12.0153	11.6515	11.7281	11.6226	11.5834	11.6284	11.5656	11.6888	11.3662	11.5574	11.647	12.2716	11.818	11.5727	11.7437	12.2465	11.3792	11.5002	11.392	11.333	11.4366	11.4301	11.4421	11.4422	11.1329
AGFG1	11.7389	11.5028	11.5904	11.5331	11.6159	11.577	11.4914	11.7269	11.7662	11.8219	11.8203	11.6182	11.6272	11.5638	11.6741	11.8393	11.4917	11.6929	12.0869	11.4594	11.6184	11.7649	11.679	11.6245	11.819	11.6286	11.595	11.7653	11.6558	12.0572
AGFG2	10.787	10.8403	10.7083	10.7324	10.8448	10.3415	11.3006	10.5231	10.5867	10.7531	10.8254	10.64	10.5452	10.8304	10.8475	10.7199	10.3471	10.4145	11.266	10.6438	10.1566	10.6401	10.4103	10.4778	10.3812	10.2834	10.4798	10.7673	10.3645	10.4742
AGGF1	10.7665	10.6923	10.9963	10.781	10.494	10.5971	10.6041	10.5751	10.7817	10.7286	10.6845	10.6322	10.759	10.5656	10.5621	10.5811	10.7515	10.6425	10.6864	10.5534	10.7003	10.8895	10.8235	10.8191	10.7977	10.8537	10.7992	10.6776	10.8164	10.7828
AGK	10.5086	10.4972	10.6602	10.4164	10.3838	10.5465	10.5045	10.1212	10.4073	10.3261	10.4995	10.6988	10.6068	10.6009	10.3925	10.6038	10.6866	10.5116	10.5506	10.5706	10.5565	10.46	10.8116	10.6194	10.6971	10.6034	10.6962	10.438	10.5019	10.544
AGL	11.8765	11.2916	11.6944	11.4823	11.1989	10.9643	11.0673	11.044	11.4076	11.6511	11.6984	11.6599	11.1713	11.4889	11.4006	10.9476	11.5833	11.3406	11.3712	11.4213	11.3588	11.8928	12.0401	11.8445	11.9241	11.9409	11.882	11.8849	11.9225	11.9099
AGMAT	13.7747	14.0223	14.5481	13.8886	13.5547	14.0042	12.4965	13.153	13.4686	13.8807	13.5732	14.4591	14.0365	14.1542	13.0292	13.038	15.1148	14.0884	12.0649	14.5664	14.2896	14.7023	14.8362	14.7091	14.7772	14.5342	14.7563	14.4993	14.9157	14.6018
AGMO	7.9556	8.27399	9.24394	8.49116	7.93151	8.08379	6.47356	7.3527	7.86207	8.35208	8.59524	9.08548	7.964	8.48151	7.40811	7.98423	9.12397	8.22016	7.44776	8.57287	8.7765	9.15678	9.83945	9.71717	9.23546	9.28014	9.47066	9.24011	9.22828	9.41943
AGO1	12.4658	12.2543	12.3747	12.3403	12.5832	12.1836	12.736	12.6431	12.4513	12.1917	12.332	12.421	12.5315	12.4413	12.4919	12.5999	12.5238	12.5434	12.2076	12.439	12.6756	12.1518	12.6006	12.313	12.325	12.3826	12.2885	12.3211	12.2098	12.2928
AGO2	12.9151	12.73	12.466	12.6237	13.0188	12.827	13.2336	13.1078	12.8338	12.6976	12.6702	12.5348	13.0036	12.8047	12.8334	13.0732	12.4221	12.9544	13.0559	12.6627	12.7789	12.3034	12.5494	12.4532	12.5385	12.2369	12.2928	12.738	12.344	12.6468
AGO3	11.1164	10.9859	10.9468	11.0362	11.3203	10.8629	11.3312	11.0304	11.008	10.9091	11.0712	11.0299	11.1955	11.0541	11.0357	11.3898	11.0016	11.1502	10.9904	11.035	11.0398	10.8652	11.1458	10.9617	10.8324	10.9656	10.923	10.8522	10.8452	11.0048
AGO4	11.428	11.3097	11.0265	11.2019	11.554	11.3593	11.8857	11.7546	11.5473	11.1609	11.3514	11.0616	11.3475	11.2701	11.5159	11.679	10.855	11.3838	11.4384	11.1204	11.5626	11.0541	11.0846	10.8435	10.9707	10.8691	10.8497	10.9072	10.8278	10.6706
AGPAT1	0.436158	0.538265	0.517138	8.60561	8.61426	8.92317	0.788928	7.23796	8.71362	7.68057	7.2878	7.89136	1.8757	8.62087	7.28977	8.46641	2.52431	0.397764	0.399364	7.61921	8.27709	8.75683	1.19149	7.92279	8.77656	7.9705	0.442557	7.79007	1.12265	0.402563
AGPAT2	11.3677	11.7192	10.7705	10.937	11.1591	11.9	11.4016	11.6313	11.4798	11.3976	11.3388	11.3915	10.9516	11.1647	11.4578	10.8968	11.7723	11.2349	11.4643	11.4948	11.557	11.065	10.2921	10.8813	10.9334	11.0937	11.4018	11.6177	11.2128	10.6423
AGPAT3	13.9015	14.4701	14.5167	14.1576	13.7379	13.6667	13.5333	13.5422	13.8202	13.9702	13.756	14.2896	13.863	14.3084	13.3062	13.5532	14.2052	13.8429	13.2804	14.3214	13.7641	14.411	14.1839	14.3912	14.3396	14.4591	14.3309	14.3781	14.5216	14.3541
AGPAT4	10.5552	10.3378	10.0544	10.3429	10.5901	10.455	10.8749	10.5038	10.507	10.4412	10.625	10.2131	10.1191	10.2206	10.786	10.6878	10.4063	10.2283	10.5373	10.3551	10.2143	10.3397	10.2777	9.70802	10.3491	10.1152	10.5881	9.88206	10.145	9.55931
AGPAT4-IT1	7.40976	7.56015	6.96489	7.23766	7.73622	7.97751	8.327	7.22618	7.54607	7.57475	7.94902	6.78629	7.26816	7.20436	8.03659	7.61939	7.74431	7.34333	7.83352	7.44741	6.68568	7.87294	7.85431	7.26686	7.99313	7.38506	8.37131	6.98362	7.68783	7.23703
AGPAT5	10.2759	10.2572	10.4648	10.0625	9.98837	10.1409	9.7097	9.8406	9.97208	10.284	10.3526	10.0628	9.93537	10.1152	9.7264	9.72833	10.1253	10.4167	9.83489	9.82569	10.5471	10.6029	10.6137	10.6759	10.6201	10.3286	10.3611	10.2079	10.2836	10.6012
AGPS	11.4323	11.299	11.2753	11.3347	11.1287	11.3745	10.8047	11.3191	11.3793	11.6433	11.576	11.3177	11.3892	10.9963	11.4596	11.27	11.4657	11.3898	11.3167	11.2066	11.4599	11.3257	11.5042	11.1906	11.2519	11.3036	11.3695	11.0355	11.2741	11.1657
AGR2	5.39328	7.71841	7.14489	7.33178	7.58001	8.97872	7.4017	8.5875	8.39711	7.56467	7.32085	6.47191	9.33661	7.04351	7.80243	8.74237	7.41027	8.34625	8.37217	8.37462	8.0024	8.59276	6.68568	6.32245	6.52495	6.61904	5.61855	6.28313	6.57486	5.93066
AGRN	15.1022	15.376	14.494	15.0446	15.3018	13.6121	15.6909	14.6681	14.494	15.3167	15.4166	14.7426	14.0854	14.8997	15.4428	14.814	13.1537	13.3492	15.506	14.8088	13.3108	14.5042	14.0557	13.9241	14.3964	14.2115	14.6116	14.7154	14.3683	14.218
AGRP	7.03338	6.91134	6.96489	7.10565	6.98958	6.47401	6.98563	6.84655	6.37087	6.59425	6.14264	6.54226	6.52743	6.74573	6.96157	7.01996	6.36622	6.47475	7.09314	6.41883	5.41151	6.26359	6.7626	6.45996	6.41004	6.96799	6.82298	6.66374	6.89512	5.35747
AGT	11.8892	11.474	12.9949	11.8204	11.8618	12.2111	10.3088	10.9084	10.724	12.5273	12.0828	13.1083	12.1654	11.5694	11.5286	11.4532	13.214	11.2335	11.1801	13.0045	12.4168	12.1774	12.1655	12.4669	12.7785	12.2912	12.7985	12.2465	12.5348	12.2507
AGTPBP1	10.4379	10.246	10.3212	10.369	10.397	10.3984	10.6274	10.4805	10.5799	10.4713	10.4813	10.3056	10.3165	10.3326	10.5038	10.751	10.2685	10.4383	10.505	10.0376	10.4545	10.4399	10.646	10.3728	10.5621	10.5361	10.3661	10.2668	10.4397	10.4589
AGTR1	8.47031	8.51223	9.50599	9.24705	8.09582	7.79486	7.93999	7.85448	8.50539	8.91286	8.78195	8.88853	7.00543	9.1095	8.29244	8.59087	8.19138	7.9511	7.98481	8.34901	7.54873	9.9076	8.81352	9.19434	8.70581	9.16698	8.61822	9.1014	9.29383	8.74612
AGTR2	1.33297	1.05566	4.70279	4.06375	4.67141	3.60077	0.788928	6.77809	2.77786	3.74256	3.87915	3.24497	0.397764	2.07837	3.29209	3.72074	5.58099	4.83694	1.91156	1.15707	4.65953	1.99808	2.44721	6.48554	0.404163	3.29209	4.9903	0.485447	4.19666	3.20749
AGTRAP	10.9889	11.4308	11.0687	11.0048	11.038	11.8328	10.8916	11.3424	11.5997	10.9712	10.9736	11.096	11.0894	11.0463	11.0182	10.6406	11.5965	11.539	11.1893	11.1503	11.9679	11.2828	11.0243	11.0289	11.0159	11.4612	11.1969	11.0472	11.0933	11.1176
AGXT	10.5133	10.3637	11.4515	10.7481	9.60691	11.5009	7.04938	8.83114	6.28829	7.80467	9.64508	10.9866	8.72832	8.72693	10.431	7.98788	12.8445	11.0244	7.18552	11.1612	10.8462	10.2886	10.8431	10.5804	10.6185	10.2657	11.6673	9.45142	11.5492	10.4276
AGXT2	13.2477	13.2218	14.3309	13.8956	12.9814	13.7105	11.4493	12.3673	13.1354	13.2909	12.8609	13.9286	13.3647	13.5948	12.4256	12.7238	14.3356	13.742	11.7751	13.755	13.7293	14.4889	14.1939	13.9603	14.0329	13.8357	14.1178	13.7048	13.9702	13.5514
AHCTF1	11.8413	11.5519	11.9764	11.9022	11.4658	11.4442	11.6296	11.6118	11.7156	11.7717	11.8597	12.0811	11.7422	11.7985	11.7194	11.8256	12.0015	11.8958	11.6368	11.6638	11.5388	12.1166	12.2354	12.1018	12.0077	12.0101	12.0484	11.89	11.9306	12.1485
AHCY	12.9963	12.9028	13.413	13.3563	12.7638	13.4522	11.8554	12.736	12.573	12.887	12.8774	13.5262	12.7843	12.9569	12.6072	12.375	14.1909	13.3756	12.4049	13.2804	13.8202	13.6226	13.7357	13.8929	13.5732	13.6017	13.5682	13.47	13.7615	13.4345
AHCYL1	13.0538	13.0501	13.2265	13.0464	12.9527	13.1318	12.9014	12.7177	12.9577	13.2068	13.149	13.2364	13.0533	13.0392	13.0496	13.0304	13.2057	12.8334	13.2472	13.1574	12.9643	13.4046	13.5059	13.3691	13.4275	13.3936	13.4315	13.4557	13.4596	13.3951
AHCYL2	11.7511	12.2199	12.3548	12.0357	11.6343	11.9852	11.348	11.3497	11.8429	11.9359	11.8657	12.0075	11.9126	12.197	11.1995	11.9306	12.2583	11.6732	11.504	12.1771	12.0021	12.3053	12.4095	12.1734	12.6741	12.5437	12.1399	12.5562	12.3269	12.2793
AHDC1	12.4267	12.4643	12.1334	12.5573	12.6712	10.8463	13.0064	11.9849	11.729	12.351	12.5494	12.5655	11.4991	12.5034	12.6792	12.1731	11.1533	11.0633	12.5739	12.3171	10.4137	12.1241	11.679	11.9711	12.1358	11.9301	12.2668	12.286	12.1161	11.9376
AHI1	10.7756	10.4626	10.6246	10.7406	10.2085	10.1776	10.6317	10.3861	10.6934	10.6927	10.7622	10.6849	10.5943	10.4895	10.6434	10.9155	10.3205	10.3276	10.7296	10.5295	10.4807	10.7198	10.8554	10.8578	10.831	10.679	10.7185	10.7698	10.6891	10.9604
AHNAK	17.6963	17.8971	16.8479	17.1514	17.8971	17.282	17.8971	18.3707	17.8971	17.282	17.4945	16.987	17.8971	17.4945	18.3707	18.1083	16.529	17.8971	17.4945	16.987	17.1514	16.987	16.5824	16.6193	16.2868	16.1363	16.6193	16.5824	16.529	16.8479
AHNAK2	11.2951	11.3334	10.6927	10.6495	11.9433	11.6887	11.6864	12.12	11.6278	10.3418	10.7151	10.2035	11.8064	10.8458	12.5517	11.7706	9.15282	11.2603	10.5597	11.424	10.3426	9.22651	9.19022	9.26702	8.57016	9.59077	8.50001	9.20568	9.4552	9.17324
AHR	12.1334	11.9608	11.8956	12.1488	12.668	12.0888	12.1127	12.3789	12.1073	11.7372	12.3078	11.4224	12.3601	12.4124	12.4844	12.5083	10.7099	12.2085	12.2067	11.6353	11.8726	11.4072	11.4325	11.1013	11.4601	11.1148	11.3469	11.5317	11.2165	11.6027
AHRR	6.81139	8.45407	5.69488	7.257	6.67335	5.6082	7.1864	6.3	6.34693	6.36011	6.14264	6.71947	5.88505	6.33083	6.84351	8.31408	6.08669	7.5383	6.96732	6.6422	6.22779	6.91926	6.97571	6.23617	7.28367	6.26188	6.29624	7.39368	6.63555	6.19019
AHSA1	11.0831	11.2646	11.2169	11.2364	11.0788	11.8134	11.0463	11.4895	11.303	11.1542	11.1519	11.2198	11.7053	11.1811	11.0408	11.1755	11.7723	11.7578	11.291	11.3497	11.9245	11.1198	11.2689	11.3473	11.2355	11.2221	11.2857	11.0107	11.1405	11.2665
AHSA2	12.0096	12.3377	12.4798	12.1842	12.0452	11.8421	12.3206	11.8849	12.1532	11.9522	12.0815	12.1548	12.3876	12.1751	12.043	12.2867	11.8947	12.2023	11.8068	12.2808	12.1614	12.1434	12.1439	12.2038	12.4638	12.3359	12.2143	11.8669	12.1925	11.7756
AHSG	6.1625	5.97394	6.21976	1.86838	1.3971	4.44792	3.2824	6.44568	5.11054	7.46598	2.18636	6.09884	4.35131	5.55732	2.93264	2.50436	6.21337	4.35131	0.399364	2.23044	4.58565	7.45968	4.80418	2.94796	5.01296	4.4567	8.0067	5.5356	3.86436	3.55444
AHSP	0.397764	0.704418	0.945074	0.538265	0.876176	1.12265	7.4017	0.645283	1.91156	2.72867	0.485447	0.619439	1.8757	0.849532	1.40628	0.431359	1.97649	0.451356	1.3652	0.538265	2.01244	0.404163	1.19149	3.57024	1.04901	1.65463	4.08979	0.485447	1.12265	0.746673
AIDA	9.92949	10.0229	10.1145	9.76103	9.74734	10.0942	10.0136	10.0764	10.0643	10.2659	9.87814	9.73714	10.0731	9.95954	9.88011	10.2425	10.0395	10.3379	9.9126	9.92911	10.2279	10.1631	9.91845	9.98448	10.0917	9.99726	10.0102	9.905	10.0132	10.1556
AIF1L	14.814	14.5216	14.0365	14.2005	14.4456	14.6228	15.0552	14.0741	14.7851	14.9794	14.9337	14.4701	14.3309	13.9515	14.6888	14.7289	14.5897	14.1542	15.0919	14.5537	13.9872	14.3265	14.5342	14.0074	14.4162	14.4403	14.4019	14.2579	14.5782	14.1766
AIFM1	12.5554	12.9159	13.2895	12.7217	12.2248	13.2021	11.5461	12.2747	12.9536	12.8865	12.7718	13.0652	13.0192	12.8723	12.1945	12.2835	13.3756	12.7037	12.4539	13.0691	13.0979	13.1384	13.4463	13.1935	13.2048	13.1537	13.2083	13.2331	13.1546	13.197
AIFM2	10.045	10.3012	10.0263	9.81109	9.98021	10.2222	9.90599	9.91071	9.85759	10.2704	9.98036	9.85721	9.76564	9.84095	9.66529	9.60368	10.3221	9.83715	9.9589	9.95913	10.3598	9.44646	9.90314	9.79178	9.40501	9.59353	10.02	9.96477	10.1478	9.79051
AIFM3	7.49835	7.52378	8.75526	7.58659	7.48451	7.48261	7.4254	8.08458	7.60234	6.66044	7.34858	8.28966	8.03576	8.09534	7.3616	7.73299	8.09324	7.42048	7.15165	7.71136	8.13067	7.99602	7.43788	8.22784	7.41407	8.02555	7.56716	7.14331	7.88271	7.7147
AIG1	11.7955	11.647	12.2357	11.803	11.5786	12.3682	11.1125	11.6218	11.77	11.7804	11.7666	12.1986	11.9637	11.8735	11.4478	11.6519	12.7071	12.2675	11.1738	12.1822	12.8089	12.1069	12.451	12.3111	12.2159	12.2758	12.2563	12.0186	12.3269	12.1907
AIM1	12.5943	12.5306	12.4646	12.5721	12.4615	12.2629	12.8665	12.2327	12.553	12.5562	12.9762	12.7207	12.4187	12.4847	12.5826	12.6243	12.4922	12.8547	12.0166	12.5746	12.4574	12.7125	12.827	12.3631	12.4492	12.6053	12.6342	12.3331	12.536	12.3626
AIM1L	5.98106	6.21811	4.54237	6.17877	5.63388	6.17508	6.6058	6.51415	5.11054	5.19908	4.98441	5.63198	5.88505	5.64525	7.01275	4.86343	5.58099	5.55732	7.92768	6.56341	2.01244	4.08712	5.02712	4.50339	3.904	5.45981	7.25783	4.98946	5.9731	5.41845
AIM2	7.22597	5.40646	5.05484	7.23766	7.06153	6.3456	6.62535	6.68108	5.82734	4.74076	6.54355	4.93646	7.22618	6.68378	5.61485	6.83932	0.402563	7.92849	5.19168	5.97509	5.94966	3.6964	4.61725	5.49652	2.15825	3.84476	3.67448	4.52054	3.86436	5.97996
AIMP1	9.93202	9.71645	9.8969	9.93027	9.32765	9.68101	9.19629	9.33565	9.75795	9.83957	9.73488	9.82439	9.75035	9.50029	9.63969	9.73454	10.0283	9.80502	9.80063	9.50947	9.94377	10.0628	10.1122	9.98036	9.90916	9.99096	10.0458	9.56161	9.71692	9.86703
AIMP2	8.84401	9.00556	9.10536	8.82069	8.79654	9.6192	8.25062	8.60766	8.82338	9.17621	8.81476	8.89549	8.6938	8.69651	8.65461	8.5655	9.24341	8.8398	9.21975	9.13136	9.22604	8.7495	8.769	8.7531	8.7985	9.02997	8.86916	9.08957	8.94931	9.05711
AIP	10.9816	10.9991	10.9278	10.9076	11.1519	11.6976	11.1182	11.546	11.1755	10.9976	10.8597	10.8136	11.3148	10.9341	10.9865	10.8834	11.4559	11.6269	10.8378	11.0972	12.1394	10.7121	10.8379	10.8124	10.8809	10.871	10.7684	10.9462	10.9717	10.6378
AIRE	5.5699	5.80094	3.53829	5.46241	5.71628	4.67496	5.54391	5.32096	3.81645	5.23907	4.91897	6.07597	5.98222	5.74658	6.01953	5.31279	5.83606	4.18325	7.25769	5.52265	3.20749	4.85774	4.26305	6.02503	5.49529	6.07805	4.83694	5.6444	5.36321	6.84317
AIRN	7.50877	7.28569	7.19174	7.39517	6.62962	6.47401	7.24698	7.12422	6.96829	7.30127	7.44741	7.21421	6.58129	7.02322	6.92174	7.16829	7.01629	5.74055	7.34009	7.25014	6.43304	7.69112	7.53532	8.11506	7.92832	7.58097	7.62652	7.38162	7.78254	8.40493
AJAP1	10.3482	11.0069	10.3559	10.7854	10.1183	10.9682	10.4848	10.2391	10.8365	10.9651	10.2764	10.8491	10.458	10.5767	10.5271	9.86218	10.3521	10.0326	11.2227	10.9922	10.0723	10.698	10.5751	10.556	10.4532	10.7874	10.7732	10.4839	11.044	10.7585
AJUBA	12.0248	11.9977	11.7144	12.157	12.001	12.0219	11.6962	12.1471	11.8413	12.5306	12.3634	12.2349	11.7563	11.3079	12.1339	11.8393	12.0857	11.5854	12.4387	11.2675	11.8963	11.7694	11.5362	11.56	11.358	11.6286	11.7211	11.1851	11.7142	12.3279
AK1	9.91756	10.1306	9.48001	9.66817	10.0072	10.2106	9.80606	9.97378	9.88677	9.95392	9.56844	9.41837	9.54914	9.70299	9.63085	9.67275	9.78321	10.0166	10.014	9.69537	10.201	9.5518	9.27995	9.34938	9.23546	9.31172	9.6756	9.68257	9.75386	9.46098
AK2	13.2699	13.1975	13.5205	13.2161	12.9944	13.4275	12.7463	13.0052	12.9175	13.2295	13.0543	13.2516	13.1913	13.2021	13.0567	13.0304	13.693	13.3631	13.0036	13.2325	13.7615	13.3966	13.5472	13.3136	13.4231	13.545	13.4915	13.2131	13.4643	13.1588
AK3	11.865	11.716	11.77	11.5958	11.4276	11.613	11.614	11.3121	11.5167	11.6999	11.6118	11.5181	11.5997	11.4247	11.4666	11.5884	11.8048	11.5672	11.7521	11.6563	11.5712	11.9264	11.9379	11.8937	11.8173	11.9044	12.0211	11.6202	11.8811	11.6988
AK4	13.7126	13.918	14.454	13.9002	13.1965	13.5547	12.4229	12.6953	13.1006	13.7577	13.4745	14.387	13.5912	13.9261	13.2392	13.1755	14.6339	13.9537	12.7812	14.0975	14.0528	14.6399	14.8918	14.8362	14.5093	14.7699	14.8299	14.6399	14.8435	14.6178
AK5	6.84426	7.53276	8.0577	7.03321	7.21656	8.29623	6.89314	7.51346	7.03398	8.1598	7.84679	6.86682	7.34515	7.25014	7.75082	7.32496	7.61833	7.75989	7.84527	8.71206	7.59218	7.28277	6.52906	6.57767	7.63928	6.90486	6.3569	6.26107	6.86804	6.64319
AK6	7.00181	6.29519	7.73797	7.15341	6.21231	7.02368	6.26708	6.68108	6.76885	7.21875	6.99777	7.10806	6.66947	6.6588	6.32887	6.74573	7.60463	7.20206	6.96732	6.44327	7.45515	7.75295	7.60892	7.91267	7.80483	7.89682	7.66164	7.01888	7.25783	8.08056
AK7	7.81725	8.10925	7.5549	7.76358	7.52593	8.1075	8.08068	7.87367	8.30961	7.9693	8.28433	7.94821	7.89401	7.56716	8.40316	8.00997	8.27596	7.55624	9.00993	8.0257	7.09816	7.95568	8.2282	8.01661	8.01832	8.06454	8.44999	7.63701	8.0391	7.7147
AK8	8.05431	8.03165	8.08756	8.19957	8.04808	8.27539	7.44418	7.91756	8.24258	7.87986	8.19937	8.05496	7.91591	7.72034	8.1158	7.93525	8.44527	7.86336	8.40781	8.05214	7.83673	8.12851	8.2282	7.97987	8.21507	8.37262	8.50867	8.04125	8.31885	8.23266
AK9	9.64465	9.3497	9.76673	9.53688	9.02529	8.90164	9.38663	9.04548	9.35824	9.3906	9.66004	9.60241	9.24854	9.43106	9.34375	9.47048	9.69687	9.11256	9.20988	9.40698	9.32723	10.0683	10.0049	9.72689	9.89249	10.0395	9.94255	9.64566	9.88861	9.6359
AKAP1	12.0825	11.9732	12.1863	11.9007	11.701	11.6373	12.1633	11.4393	11.6171	11.6192	11.9376	12.2405	11.746	12.0323	11.6685	11.7653	12.3041	11.6334	11.5587	12.1671	11.6462	12.2678	12.3123	12.4225	12.1736	12.2497	12.3918	12.1532	12.375	12.0572
AKAP10	10.9889	10.9199	11.0558	11.066	10.9617	10.9365	11.0481	11.1272	11.0855	11.0692	11.1221	11.0272	11.1292	11.115	11.1944	11.133	11.0317	11.0745	11.0074	10.912	10.9944	11.222	11.2517	11.0673	11.0191	11.0362	11.1041	10.9591	10.9134	10.9302
AKAP11	12.7592	12.3869	12.7494	12.6984	12.5742	12.3831	12.3505	12.5938	12.7051	12.6828	12.6961	12.7374	12.6648	12.6257	12.6308	12.9014	12.6534	12.8994	12.3773	12.4229	12.8006	12.782	12.9082	12.7516	12.7203	12.7053	12.5877	12.699	12.7129	12.6756
AKAP12	13.9515	13.8069	13.0799	13.6493	14.0884	13.8546	13.0472	13.8886	13.7428	13.8406	14.0651	12.7067	13.7165	13.2006	13.7539	14.2052	12.0616	13.5563	13.7398	13.1131	13.4609	12.7006	12.983	12.41	13.0969	12.1111	12.2691	13.095	12.6179	13.7165
AKAP13	14.2704	14.1615	13.7907	14.0528	14.4804	14.0922	14.5957	14.6178	14.3734	13.993	14.103	13.8807	14.5537	14.3214	14.4204	14.5438	13.6815	14.5247	14.1512	14.1725	14.0251	13.8807	13.9576	13.8406	13.7577	13.586	13.616	13.9655	13.5821	13.8578
AKAP3	7.46338	7.12288	7.68743	7.41172	6.96301	7.21047	6.69963	6.42105	7.51574	7.33921	7.56776	7.74793	6.61904	6.91462	7.46721	7.26686	8.15362	7.37965	7.68142	7.26122	7.81552	7.64576	8.2282	8.27971	8.12921	8.07012	8.39262	7.48117	8.0391	7.3508
AKAP5	8.81714	8.75178	8.55534	8.61269	8.81644	8.70077	9.47554	9.01194	8.97042	8.64774	9.20973	8.79368	8.92828	8.16876	9.42352	9.12115	8.42925	9.08778	8.82318	8.66814	8.40083	7.99602	7.94424	7.80872	7.81515	8.2048	7.91756	8.24391	7.88271	8.81005
AKAP6	10.67	10.503	10.6258	10.2919	10.1478	10.4414	9.9588	10.0215	10.32	10.5234	10.7772	10.7493	10.2046	10.2785	9.9106	10.3559	10.8658	10.3806	9.95701	10.3683	10.3692	10.8937	11.0117	10.7688	10.5149	10.8776	11.1569	10.6013	10.7786	10.6607
AKAP7	8.48028	8.22053	8.11398	8.51802	8.22784	8.4968	8.57836	8.45986	8.37843	8.39286	8.41641	8.27567	8.93129	8.27531	8.33033	8.41169	8.15362	8.42263	8.25096	8.46837	8.54188	8.48727	8.42616	8.65803	8.3024	8.58453	8.82338	8.43287	8.10307	8.08056
AKAP8	11.3906	11.3661	11.3284	11.3664	11.4224	11.2102	11.6296	11.3415	11.141	11.263	11.4274	11.4393	11.3261	11.4922	11.4515	11.3842	11.2114	11.1136	11.5424	11.3725	10.9307	11.3552	11.3404	11.3269	11.4088	11.2828	11.3093	11.4171	11.2883	11.5407
AKAP8L	12.1177	12.0291	11.9487	12.1468	12.2586	11.6412	12.5009	12.0045	11.9112	12.0193	12.1392	12.1081	11.8124	12.1693	12.1911	12.06	11.6179	11.6261	12.2493	12.0596	11.3275	11.9895	12.0166	11.8482	12.1059	11.9451	11.9776	12.0423	11.982	11.9587
AKAP9	12.8904	12.5129	13.0251	12.9254	11.9526	11.4822	12.5484	12.0678	12.3301	12.5258	12.5225	12.4789	12.3756	12.4063	12.4513	12.4633	11.9611	12.0754	12.1699	12.3833	11.712	13.2063	13.2172	12.8831	12.9331	13.0289	13.1297	12.2758	12.6777	13.01
AKIP1	9.13944	9.1807	8.86367	8.85771	9.30271	9.86703	9.11428	9.43692	9.42577	9.3906	9.13093	8.84708	9.3453	8.9422	9.31136	9.30246	9.38677	9.61861	9.56527	9.37499	10.256	8.5875	8.97614	8.61269	8.83956	8.87117	8.98684	8.83114	8.72999	8.66069
AKIRIN1	11.5121	11.4548	11.4415	11.3	11.4932	11.6976	11.5779	11.5141	11.7168	11.6005	11.4449	11.4449	11.4653	11.4063	11.3786	11.3151	11.6263	11.4274	11.847	11.411	11.4117	11.3165	11.3801	11.3424	11.333	11.3416	11.4723	11.6809	11.5038	11.9369
AKIRIN2	10.0658	9.93914	10.1401	10.2549	10.1621	9.83509	9.91489	10.1874	9.98007	10.024	10.3376	10.1259	10.0089	10.219	10.3642	10.1492	9.90875	9.92341	10.269	10.0394	9.61041	10.1527	10.0129	10.4695	10.3942	10.1114	10.2613	10.348	10.254	10.3342
AKNA	12.5021	12.2767	11.656	12.7872	13.4188	11.5272	13.8429	13.4928	12.4063	11.7821	12.3483	11.8149	12.9249	13.1302	13.2529	12.9198	10.3379	12.9331	12.2441	12.2124	11.0243	11.0566	10.3915	11.0525	10.7512	10.6439	10.598	11.2977	10.8403	11.1362
AKR1A1	13.2804	13.5803	13.7886	13.3595	13.1208	14.0975	12.4476	13.3659	13.3033	13.2733	13.1235	13.5803	13.5189	13.3337	12.8089	12.8192	14.2933	13.8269	12.5826	13.7475	14.2704	13.431	13.6647	13.6035	13.444	13.674	13.6985	13.5113	13.6704	13.5899
AKR1B1	11.7365	11.5863	11.0622	11.107	11.5942	12.2093	12.4201	12.0125	11.9719	11.5373	11.7722	11.2102	11.9251	11.2645	11.8652	11.7106	11.4925	11.7014	12.1609	11.4816	11.9272	10.8022	10.7918	10.7322	11.8985	10.6624	10.97	11.1752	10.7701	10.9251
AKR1B10	5.17572	6.27342	6.86211	5.4136	5.5531	7.45582	4.79785	4.5015	6.46522	4.14954	4.21961	6.68724	7.34515	5.32096	4.50479	6.54246	6.88136	6.12297	8.77656	6.94845	6.64523	6.28829	6.39237	6.09884	5.80224	7.6904	10.8776	8.4288	10.6604	5.88469
AKR1C1	10.2324	10.4819	10.3663	9.44153	10.3341	10.9654	9.36372	10.1698	10.1898	9.59324	10.2895	10.1715	10.4787	9.95323	10.2396	11.2367	9.94517	10.8578	10.0964	11.0512	11.0572	9.84282	10.1658	10.3273	10.3465	10.0768	10.453	9.60056	10.4681	10.9197
AKR1C2	7.9342	8.23287	7.78457	7.30361	7.75372	8.0124	9.73572	7.72504	9.75146	7.51346	7.91059	7.40061	7.42834	7.94953	7.83823	8.2694	7.06057	7.86336	8.7596	8.17607	8.00997	7.53532	7.25783	7.50924	7.70687	7.37075	8.13148	9.04548	7.18552	8.02044
AKR1C3	11.5214	11.8271	12.1722	11.6792	11.5244	12.6702	10.3273	11.8731	12.2073	11.6433	11.5834	12.4311	12.155	11.4384	11.1194	11.3872	12.8179	12.4746	11.5447	12.0921	12.7949	12.0923	12.1734	12.1392	11.9167	12.0904	12.4547	11.7044	11.7823	11.8705
AKR1E2	7.69325	8.52915	8.37925	8.18097	8.04073	8.86332	8.65341	8.84636	8.75985	7.65899	8.0024	8.09777	8.64173	8.43523	8.10879	8.2694	8.2811	8.81801	7.70141	8.09986	9.79178	8.24132	8.61858	8.22069	8.37843	7.66829	8.75178	8.20162	8.19737	7.60796
AKR7A2	12.4387	12.6821	12.9703	12.5886	12.4821	13.1397	11.9951	12.4566	12.325	12.4244	12.3132	12.9765	12.7117	12.5184	12.2485	12.0654	13.4201	13.0559	11.887	12.9872	13.454	12.7397	12.78	12.7171	12.8006	12.9346	12.8006	12.5623	12.8649	12.6582
AKR7A3	11.7565	12.066	12.4812	12.3403	11.4433	12.7991	10.9521	11.6364	10.9436	11.8304	11.572	12.746	12.1239	12.2088	11.3634	10.853	13.3734	12.657	10.7236	12.5539	12.8428	12.5123	12.4975	12.483	12.553	12.6889	12.8691	12.3526	12.2928	12.4035
AKR7L	8.99507	9.30804	9.30424	9.2346	8.65213	8.56582	8.89358	7.79754	7.94649	8.88716	8.4286	9.58438	8.54571	9.17518	8.6307	8.56125	9.6085	8.64933	8.0024	9.44209	8.15247	9.46086	10.1601	9.24299	9.23945	9.96187	10.057	9.2541	9.80306	9.18108
AKT1	12.6689	12.8115	12.4618	12.5899	12.7861	12.9726	12.8961	12.9159	12.7181	12.7909	12.6129	12.563	12.6578	12.6499	12.8104	12.6226	12.4908	12.6069	12.9846	12.5661	12.4874	12.2888	12.2178	12.2693	12.2949	12.2245	12.4273	12.5569	12.3619	12.3752
AKT1S1	10.7114	10.8279	10.8825	10.8789	10.8666	10.85	10.7147	10.6532	10.7199	10.8357	10.6272	10.6582	10.4994	10.7062	10.5997	10.6113	10.9433	10.6598	10.7103	10.795	10.5795	10.704	10.5703	10.8251	11.0429	10.8758	11.1329	11.0574	11.0964	10.9243
AKT2	12.7677	12.9405	12.8813	12.9491	12.8298	12.5813	13.0989	12.6366	12.6321	12.7374	12.753	12.8471	12.6563	12.8306	12.7755	12.6427	12.6582	12.4983	12.8153	12.9264	12.3759	12.8009	12.7933	12.7933	12.8741	12.8802	12.89	12.9482	12.9134	12.8916
AKT3	11.9794	11.7103	11.6282	11.8326	11.8574	11.8694	12.1699	12.1769	12.25	11.8324	11.8811	11.8137	12.0822	11.772	11.8708	12.3438	11.6423	12.3356	11.71	11.4985	12.219	12.017	11.9082	11.8053	11.8389	11.8567	11.7348	11.6402	11.6125	11.6103
AKTIP	10.4357	10.176	10.4207	10.3398	10.0849	10.3415	10.1653	10.1354	10.4263	10.4362	10.4021	10.3783	10.3103	10.1057	10.1208	10.3177	10.7987	10.6264	10.0357	10.3054	10.6607	10.376	10.6696	10.3477	10.2684	10.5328	10.428	10.1464	10.4397	10.2566
ALAD	12.3988	12.8585	13.5051	13.038	12.3379	12.6397	11.8178	11.973	12.8639	12.8247	12.5319	13.2922	12.6635	12.9758	12.0709	12.1136	13.41	12.8205	11.6112	12.9198	12.7545	13.4686	13.6017	13.7615	13.49	13.6907	13.5532	13.3427	13.4922	13.2201
ALAS1	10.9909	11.1814	11.0209	10.8195	10.93	11.5364	11.0094	10.9271	10.9964	11.0707	10.9988	11.0313	11.1428	10.8015	11.1007	10.8394	11.0571	10.5567	11.432	11.094	10.8709	10.756	10.8825	10.8516	10.9452	11.1918	11.0772	11.2339	11.0894	11.1275
ALAS2	5.32325	5.05347	6.30462	3.87915	4.00371	7.07799	13.2201	6.3	4.9853	8.72371	4.70279	5.1523	7.34515	3.20749	5.98339	4.70279	5.65949	5.06654	5.36803	6.41883	3.80996	5.2262	5.9728	4.63467	6.26188	5.1327	8.27362	5.16697	5.47816	4.37017
ALB	11.5121	11.3088	12.4973	12.3869	9.20736	10.91	4.5015	7.76394	10.1143	12.1012	11.6868	13.1513	10.2092	12.5813	7.52565	10.2513	13.632	10.4365	8.20987	11.3277	11.9784	13.4391	13.9079	13.805	13.0418	12.7587	13.094	13.2994	12.8741	13.8974
ALCAM	11.0831	10.9887	11.7087	11.3026	10.7227	10.5923	10.362	10.5374	10.7992	11.168	11.1475	11.4927	10.8946	11.1546	10.9242	11.0277	11.0434	10.5795	10.95	11.0715	10.9636	11.5859	11.6073	11.7366	11.707	11.7981	11.4857	11.5426	11.4873	11.6387
ALDH16A1	11.1527	11.3401	11.5442	11.4944	11.2236	11.0568	11.4255	11.2995	10.9787	11.0972	11.3992	11.5171	11.1731	11.5364	11.3013	10.98	11.302	10.7502	11.4409	11.4428	10.7787	10.9517	11.2163	11.4421	11.324	11.2857	11.2113	11.3844	11.4981	11.0725
ALDH18A1	11.2862	11.5863	11.1614	11.248	11.5599	11.9201	11.2747	11.4837	11.5604	11.5531	11.7644	11.3167	11.8916	10.6566	11.7064	11.4308	11.4053	11.348	12.2905	11.5674	11.2874	10.9924	11.014	10.94	11.0267	11.0839	11.0516	11.0867	10.91	11.0525
ALDH1A1	13.3008	13.5221	13.616	13.4686	12.9366	13.6721	12.8287	13.1374	13.7428	13.5927	13.8315	13.331	13.6944	13.1374	13.2626	13.0927	13.5927	13.3442	13.4789	13.6418	13.2386	13.429	13.5834	12.95	13.2354	13.6301	13.8248	13.0623	13.8269	13.167
ALDH1A2	10.5133	10.5923	10.6004	10.717	10.8169	10.7684	10.767	10.9091	10.901	10.7894	10.4655	10.1858	10.3677	10.7647	10.7729	10.9598	10.6641	10.8336	10.505	10.6933	10.2345	10.7508	10.5091	10.4937	10.5933	10.3795	10.6609	10.474	10.718	10.1651
ALDH1A3	8.66902	9.12095	8.36649	8.7473	8.54911	9.12812	8.05028	8.7295	8.98871	8.48334	8.99575	7.63119	8.6938	9.13061	9.00351	8.59087	7.28246	8.3343	9.66539	7.82412	8.54717	7.28277	7.07186	6.69361	7.24481	7.04009	6.76389	7.28648	6.75961	7.10612
ALDH1B1	12.7089	13.1288	13.454	12.4689	12.342	13.3595	11.7479	12.0142	12.4681	12.777	12.521	13.5748	13.203	12.4908	12.2303	12.0852	13.3033	12.3019	12.2949	13.6944	13.1925	13.5043	12.6889	12.9308	13.0662	13.6121	13.8109	13.143	13.2247	12.6377
ALDH1L1	13.0551	13.0905	13.8835	13.5482	12.5877	13.1599	11.89	12.0509	12.6315	12.9155	13.2738	13.9481	12.9916	13.3595	12.31	12.2808	14.1329	13.0418	12.373	13.7664	13.3734	14.106	14.2933	14.4019	13.963	14.0975	14.2081	13.979	14.3356	14.0162
ALDH1L1-AS1	5.25293	5.20297	6.71908	5.8761	4.60763	5.28446	5.10111	5.12688	3.92274	5.65552	5.47968	6.80864	4.75248	5.85281	4.11067	4.86343	6.29074	4.98881	4.35932	6.21008	6.29671	6.68676	7.74589	6.48554	6.92933	6.94357	6.90662	7.06336	6.75961	7.83302
ALDH1L1-AS2	7.0841	7.86207	8.06337	6.8789	6.72008	7.32529	6.40067	6.44568	7.10776	7.4254	7.16632	8.18075	7.05722	7.06901	6.60029	6.86982	8.52712	7.41172	6.766	8.08268	7.68743	8.22869	8.68861	8.96476	8.73779	8.74099	8.44249	8.49546	8.46168	8.20672
ALDH1L2	8.28512	8.70247	7.78457	9.15522	8.91654	8.99302	8.87212	9.05567	8.70466	8.35208	8.56907	8.12445	9.42186	9.03205	9.4411	9.18515	7.48758	8.97174	8.50878	9.03073	9.20937	7.63352	7.46059	8.1257	7.39237	6.86682	7.45284	7.39368	7.78254	7.48793
ALDH2	13.7436	13.8406	14.6339	13.9028	13.6017	13.8956	12.8892	13.4362	13.6105	13.6776	13.9819	14.2149	13.7865	13.9458	13.1235	13.4928	14.6602	14.1839	12.7322	14.411	14.2933	14.4358	14.5093	14.6952	14.4701	14.4247	14.6888	14.254	14.6062	14.5593
ALDH3A1	3.86886	6.16618	5.8761	5.27906	4.67141	6.60563	3.68552	5.41008	5.11054	5.36321	4.98441	6.54226	4.67932	4.52806	4.93316	4.48761	6.40792	4.93316	5.60466	6.56341	7.22186	5.2262	5.10728	5.10462	5.9195	5.76536	6.99111	6.53297	6.39196	5.93066
ALDH3A2	13.1639	12.9749	13.7747	13.1826	12.7592	13.0036	12.3489	12.6069	12.7812	12.7918	13.2	13.537	13.1188	13.2448	12.4397	13.1935	13.8862	13.4259	12.2288	13.2041	13.6667	13.8886	14.3396	14.1766	13.9732	14.0251	13.6761	13.5848	13.5702	13.6583
ALDH3B1	10.2114	11.4932	11.6474	11.6365	11.1051	11.24	10.4299	11.0691	11.14	11.4488	10.6336	11.4639	11.0905	11.6812	11.1435	10.4605	12.2166	11.245	10.7052	11.4493	10.7174	11.7185	11.0436	11.7261	11.0313	11.8927	11.7831	11.3964	12.0332	11.3835
ALDH4A1	14.4491	14.7563	15.6489	14.8205	14.2257	14.4643	12.8362	13.4789	14.3027	14.9976	14.7091	15.017	14.7925	14.9892	13.355	13.8521	15.3597	14.3265	13.8028	15.0686	14.9418	15.3912	15.4166	15.536	15.4754	15.4754	15.4428	15.5198	15.6078	15.5198
ALDH5A1	11.6627	12.0921	12.232	11.8463	11.5961	11.402	11.0558	11.3625	11.4169	11.7156	11.8718	12.3903	11.6175	11.8046	11.5644	11.2198	12.5491	11.7627	11.1005	12.2058	11.9623	12.3855	12.4008	12.3769	12.589	12.7285	12.4802	12.0282	12.3529	12.1868
ALDH6A1	14.2744	14.2005	15.2568	14.8362	14.0272	13.8974	12.7936	13.1208	13.4618	14.3734	14.5438	15.29	14.1434	14.6824	13.9895	13.7747	15.3489	14.3027	13.1659	14.9976	14.5481	15.4166	15.7322	15.6909	15.4166	15.5915	15.6267	15.4428	15.4288	15.5487
ALDH7A1	12.3206	12.5136	13.4201	12.6226	12.1728	13.0146	11.4384	12.2227	12.4847	12.4965	12.4589	13.0732	12.7152	12.7309	12.2135	12.3418	13.3389	12.748	11.9309	12.892	13.3122	13.5189	13.527	13.3966	13.3147	13.3781	13.167	12.9944	13.1714	13.2122
ALDH8A1	11.7606	12.1464	12.6635	12.001	11.4276	12.232	10.5388	11.3399	11.7584	12.0697	11.848	12.6516	12.1917	12.0875	11.1931	11.1597	12.8741	11.9885	11.1885	12.5434	12.1936	12.6176	12.6841	12.8314	12.4945	12.8533	12.8569	12.4344	12.7761	12.5219
ALDH9A1	12.1263	12.4934	12.8616	12.458	12.2067	12.6895	11.6583	11.9241	12.364	12.3747	12.5746	12.7971	12.5602	12.5306	11.9943	12.2668	13.246	12.4971	12.0614	12.6593	12.8115	12.9758	13.3215	12.9466	13.1188	13.0676	12.9676	12.8216	13.1363	12.8389
ALDOA	14.9157	14.7629	14.4403	14.6457	14.5216	14.8435	14.4247	14.6116	14.9076	14.8088	14.7289	14.4297	14.5782	14.4804	14.7154	14.4204	14.6888	14.5167	14.9606	14.6824	14.3964	14.3541	14.2779	14.2579	14.4804	14.4358	14.6062	14.6749	14.6539	14.4456
ALDOB	16.987	17.4945	18.3707	17.8971	16.7609	18.1083	15.3489	16.4374	17.282	17.1514	16.987	18.1083	17.6963	18.1083	15.6707	17.6963	18.3707	17.6963	15.5487	18.1083	17.8971	18.1083	18.3707	18.7809	17.8971	18.3707	17.8971	18.1083	17.8971	18.1083
ALDOC	8.60657	8.56035	8.75526	8.84653	8.74126	8.90519	8.13031	8.45595	8.67922	8.57404	8.47187	8.4946	8.83615	9.00351	8.96974	8.58088	9.11398	9.04198	8.78052	8.65749	8.5178	8.74515	8.62195	8.67214	8.20862	9.00531	8.90493	8.96947	8.91025	7.9056
ALG1	9.86946	10.1251	9.99549	9.94143	9.91681	10.3038	9.6731	9.79664	10.052	10.003	9.89553	9.97694	9.82096	9.96669	9.95973	9.66626	10.1478	9.96919	10.0386	10.058	9.62304	9.81942	10.0655	9.79425	9.7993	10.0063	9.89781	10.0542	10.0923	9.55372
ALG10	7.71781	7.59358	7.83352	7.98944	7.63449	7.94902	7.24698	7.90344	7.67542	7.62193	8.05617	8.19283	7.4448	7.75305	7.76626	7.6892	8.21575	7.79754	7.76204	7.84561	7.62193	8.4351	8.3149	8.29768	8.28433	8.26448	8.19527	8.1477	8.22543	8.22286
ALG10B	8.71142	8.42281	8.71239	8.57702	8.33609	8.63752	8.71917	8.69356	8.81378	8.73948	8.75085	8.61078	8.86579	8.62087	8.76818	8.91964	9.11796	8.91908	8.75563	8.72539	9.06691	9.14532	9.22973	8.91354	8.91194	8.99386	9.0836	9.0703	8.87822	8.87121
ALG11	7.87181	7.86917	8.35567	8.21129	7.48451	7.78829	7.4017	7.65845	8.32712	8.33932	8.32868	8.24579	7.62973	8.02563	7.85415	7.69749	8.36557	7.92849	7.78845	7.56873	7.63027	8.39891	8.78169	8.55149	8.58769	8.61269	8.5813	8.59996	8.4253	8.81607
ALG12	10.8389	11.0866	11.0488	11.01	11.0439	10.837	10.9966	10.7823	10.8365	11.1304	10.9976	10.9474	10.6211	10.9099	10.8027	10.6421	10.8487	10.4952	11.0542	10.8607	10.6361	10.7742	10.7517	10.8391	10.7893	10.9425	10.8677	10.8991	11.0525	10.8212
ALG13	11.0274	10.8448	10.9248	11.0299	11.093	10.5851	11.0547	11.0452	11.207	10.7489	11.0971	10.839	11.3125	11.005	11.0901	11.3109	10.6729	10.9873	10.9478	10.9316	11.0768	10.9039	10.9218	10.9898	11.0258	10.8355	10.8333	10.9106	10.7614	10.9286
ALG14	8.09605	8.22722	8.57404	8.11438	8.32928	9.17712	7.49256	8.45595	8.61293	8.65793	8.3728	8.39561	8.32522	8.0577	7.96533	8.32063	9.23957	9.03315	7.88165	8.37925	9.71037	8.59996	8.62604	8.68218	8.67354	8.5632	8.88955	8.5404	8.55019	8.72412
ALG1L9P	7.14769	6.98822	7.35167	7.50082	7.59086	7.04905	7.51081	7.48075	7.05722	6.75961	7.67408	7.0791	6.68676	6.89314	7.08193	7.22527	7.52887	6.84655	7.5389	7.36369	7.5592	7.28277	7.14195	7.1533	7.31012	7.61921	7.49407	7.80483	7.51461	6.8859
ALG2	10.585	10.7087	10.681	10.6731	10.5512	10.9948	10.2604	10.6924	10.808	10.6621	10.6145	10.7218	10.8144	10.6509	10.5745	10.5343	11.0024	10.7764	10.7956	10.6917	10.6737	10.6401	10.756	10.6094	10.5572	10.6953	10.6899	10.5933	10.8045	10.6317
ALG3	9.91113	10.1911	10.0626	10.0352	9.80128	10.2092	9.53303	9.83945	9.83945	9.96859	9.92057	9.94255	9.93232	9.83149	9.86946	9.43797	10.1586	9.94359	10.2496	9.9225	9.39795	9.68383	9.55847	9.48453	9.82238	9.84184	9.79565	9.9122	10.1281	9.74523
ALG5	9.29543	9.37976	9.60119	9.33867	8.98761	9.79034	9.05472	9.3398	9.52332	9.50466	9.51888	9.33246	9.0877	9.16402	9.36058	9.15548	9.8392	9.66877	9.61266	9.31172	9.45919	9.59643	9.7018	9.5706	9.67625	9.62593	9.56962	9.33912	9.30476	9.64235
ALG6	7.20161	7.22025	7.99176	7.94471	7.64934	7.51598	7.58422	7.60883	7.74488	7.94447	8.22869	7.79048	7.68949	7.90991	7.74392	7.8045	8.08056	7.89991	7.99618	7.42784	5.69049	8.47187	8.26795	8.47107	8.06668	8.21294	8.22722	8.15869	8.29165	8.31947
ALG8	9.4187	9.18314	9.56477	9.71595	9.08787	9.56954	8.958	9.10761	9.45157	9.80606	9.66727	9.6132	9.40545	9.49736	9.58619	9.36753	9.82733	9.37315	9.73555	9.39795	9.27087	9.92658	9.89509	9.85475	9.58964	9.87615	9.72518	9.72893	9.72	9.70893
ALG9	10.1908	10.1808	10.2884	10.3429	10.4164	10.2462	10.2557	10.2913	10.3421	10.3577	10.4399	10.241	10.1562	10.2146	10.3685	10.4316	10.4438	10.3476	10.4022	10.167	10.1193	10.3694	10.3789	10.3298	10.1731	10.334	10.0853	10.2208	10.2254	10.1922
ALK	7.22597	7.45005	7.64873	7.55654	7.31819	7.26686	7.49256	7.58893	6.98285	7.59495	7.48883	6.98563	7.46542	7.27099	7.17609	7.43693	7.59759	7.33474	7.34009	7.50082	7.93607	7.04673	7.58904	6.60282	6.59404	7.14907	6.84426	7.37075	7.04745	6.43754
ALKBH1	8.80436	8.92894	8.90345	8.82514	8.69368	9.14532	8.70312	9.01194	8.93539	9.04461	8.92317	9.00993	8.94325	9.08872	8.81925	8.93087	9.4478	9.00877	9.0222	9.16637	9.46652	9.09771	9.14005	9.17813	9.09464	9.09361	9.01125	9.03777	8.94119	9.15923
ALKBH2	8.00688	7.79306	8.24459	7.89612	7.96772	8.63752	7.57538	8.26298	8.13067	7.7193	7.71441	7.89136	8.10879	7.51574	7.71252	7.97019	8.51989	8.4821	8.15917	7.86241	9.16119	7.71903	7.62174	7.87015	7.67577	7.95948	7.85873	8.03335	7.81878	7.54489
ALKBH3	9.13944	9.18749	9.20625	9.00573	9.25175	9.49072	9.18098	8.97222	9.39872	9.08177	9.09014	9.33536	9.09665	8.95559	9.1608	9.21715	9.4478	9.40879	8.99559	8.99677	9.67434	9.08459	9.20525	9.1095	9.10267	9.30074	9.3015	9.02915	8.97718	8.7951
ALKBH3-AS1	6.9034	6.35975	7.08718	7.08824	6.62962	7.00227	6.97639	6.84655	7.205	6.94357	7.14307	7.21421	6.3747	7.07398	6.94743	7.25251	7.38853	7.05466	6.95375	7.00733	7.02368	7.32614	7.4044	6.42882	6.82724	7.35769	7.22504	7.53422	7.08886	6.40115
ALKBH4	9.25755	9.47615	9.28824	9.41463	9.47033	9.94359	9.78071	9.6125	9.41897	9.52921	9.20504	9.47554	9.46799	9.4124	9.21715	9.17606	9.79989	9.5554	9.50599	9.58223	9.74974	9.32427	9.39	9.38507	9.33125	9.47751	9.36462	9.48029	9.53284	9.15631
ALKBH5	12.8758	12.9672	13.0261	12.9586	12.8953	13.0782	12.7508	12.7701	12.8115	12.9758	12.8709	13.0722	12.9717	12.9805	12.6928	12.4532	13.2152	12.9039	12.7453	13.0774	13.1537	12.89	12.9046	13.0407	13.0314	13.1208	13.0229	13.176	13.3327	12.9608
ALKBH6	8.76794	8.76695	8.84255	8.85771	9.02013	9.07025	8.98617	8.96534	8.80519	8.69368	8.65803	8.79368	8.72371	8.66951	8.81925	8.77248	8.83077	8.88267	8.73895	8.77534	9.18628	8.69625	8.38725	8.76361	8.88516	8.76675	8.78236	8.95682	8.77996	8.57973
ALKBH7	10.6859	10.9953	10.9571	10.8718	10.8157	11.58	10.4631	11.2121	11.008	10.8491	10.4283	10.854	10.826	10.6566	10.5019	10.0034	11.7331	11.4171	10.447	10.9451	12.2011	10.7527	10.6184	10.9599	10.7893	10.8554	10.9169	10.9624	11.0428	10.7808
ALKBH8	8.73664	8.53566	9.06055	8.67343	8.56798	8.69703	8.14035	8.57287	8.71812	8.48981	8.59103	8.63112	8.64572	8.6162	8.58453	8.71338	8.75272	8.85515	8.61822	8.43523	8.59719	8.98637	8.97614	8.79613	8.80752	8.75703	8.95519	8.34088	8.85735	8.53322
ALLC	6.71649	6.98822	8.8217	7.89612	6.21231	6.10478	4.26305	5.36674	7.28569	7.70471	7.23048	7.93485	6.4167	6.91462	6.92174	6.52083	8.73103	7.9511	7.1606	8.2512	8.46809	7.87294	8.53396	7.24837	8.63112	8.19647	6.47356	7.64832	8.80448	8.64131
ALMS1	12.8741	12.6377	12.5847	12.8314	12.8454	12.7296	13.0439	13.095	13.01	12.7184	13.0188	12.7548	12.973	12.7539	12.9604	13.1959	12.593	12.8982	12.8445	12.6082	12.7353	12.6411	12.8061	12.5335	12.6061	12.5513	12.54	12.5319	12.41	12.3939
ALMS1P1	7.03338	6.29519	6.96489	5.7703	6.17508	6.91658	5.99789	6.62471	7.61073	6.85856	6.08287	7.00059	6.68676	6.90359	5.84066	6.22333	7.78845	6.9471	6.43954	6.79317	6.22779	7.71903	7.33921	7.63928	7.13927	7.0223	7.02905	6.26107	6.92174	6.46922
ALOX12	9.59159	9.62027	9.73998	9.62603	9.59995	8.74744	9.87213	9.02258	9.07624	9.46677	9.57786	9.7649	9.25104	9.81922	9.4295	9.48748	9.24919	9.06055	9.32528	9.81387	8.92618	9.82922	9.60985	9.33494	9.99867	9.80672	9.83766	9.80436	10.1243	9.29051
ALOX12-AS1	6.30462	6.10152	6.78477	6.39155	6.11909	6.7565	5.88964	5.95507	5.89621	6.33375	6.20094	6.68724	5.9187	6.35233	6.27488	6.30462	6.86561	6.71629	5.94367	5.72636	7.189	7.10417	6.60827	6.64737	7.16978	7.38506	6.76389	6.72224	6.94403	6.73716
ALOX12B	5.5699	6.12266	6.18506	5.46241	5.76193	6.24211	5.64213	5.84066	5.67095	6.38549	6.62316	6.98563	6.27488	6.33083	5.61485	5.64831	7.25644	6.14036	6.21137	7.20661	6.62376	6.76741	6.52906	5.84043	6.56853	7.60704	6.82298	7.08169	6.39196	6.40115
ALOX12P2	9.32342	9.50826	9.53184	9.55704	9.51702	9.63606	9.82892	9.35318	9.40545	9.56527	9.72987	9.78033	9.13792	9.32528	9.40657	9.49036	9.17613	8.90627	9.87781	9.86381	9.26702	9.76628	9.91845	9.46443	9.72582	9.68405	9.40721	9.87543	9.9456	9.38911
ALOX15	2.29093	3.30138	3.53829	2.99865	5.59888	4.60565	6.80763	6.76373	7.29731	1.97649	4.98441	4.18413	2.88097	5.88542	5.61485	3.62016	3.96924	4.66015	1.91156	3.42911	3.80996	2.98333	1.19149	4.00371	4.08712	2.70815	3.67448	2.97938	0.434558	2.36515
ALOX5	10.467	10.342	9.30804	10.2549	11.0354	10.7637	11.2091	10.9344	10.5167	9.35916	10.1531	9.36947	10.636	10.819	11.0692	10.5383	8.34256	10.4067	10.8369	10.2428	9.41752	8.48203	7.65034	8.25062	8.27155	7.66829	8.15285	9.21732	8.25607	9.16402
ALOX5AP	8.4561	8.23287	7.57654	8.05192	8.77778	9.28167	8.86332	9.58156	8.72275	7.9598	8.05054	7.31681	8.80667	8.54571	9.06489	9.16637	7.30127	9.36601	8.06384	7.92742	9.09361	7.32614	6.74492	7.24837	6.8859	7.10372	6.56099	7.89554	6.98465	7.41186
ALPI	6.88374	8.54776	7.10594	6.48449	6.40471	8.38237	5.57743	6.06767	6.1968	7.22618	5.21383	8.10671	6.61904	5.32096	7.37747	4.31694	9.39675	5.70498	6.79596	9.07353	3.46031	6.31129	6.74492	8.27362	5.69762	6.77995	9.01894	5.49652	8.62195	4.96465
ALPK1	10.7085	10.5118	10.252	10.4683	10.6252	10.4339	11.0029	10.7411	10.7068	10.5028	10.6082	10.2307	10.5997	10.6144	10.7666	10.841	10.157	10.3735	11.0469	10.4449	10.2465	10.304	10.2203	10.2694	10.2646	10.3577	10.4455	10.4361	10.0923	10.151
ALPK2	12.7063	13.2567	12.5027	12.5086	13.3505	13.41	12.0976	12.7742	12.2865	12.642	12.6748	12.2869	13.4557	12.4267	12.7592	12.4853	12.2971	12.6609	12.656	11.8726	12.8758	11.8217	12.3029	11.3964	12.4686	12.7309	13.1322	12.0598	11.6717	12.1573
ALPK3	13.0179	12.396	11.8849	12.1399	12.5896	12.3551	12.8445	12.6044	12.0294	12.3298	12.5813	12.4079	12.2605	12.1253	13.2496	12.1796	11.3749	11.77	13.5333	12.5383	11.7835	12.1883	12.1263	11.9459	12.066	11.9205	12.3062	12.1277	12.4283	12.8451
ALPL	11.8544	12.4513	12.7329	12.207	11.5199	12.012	11.0382	10.8816	11.8402	11.9213	11.79	12.5195	11.4378	12.2842	11.0886	11.1665	13.3442	11.6829	10.7321	12.827	12.2446	12.8953	12.7774	12.8428	13.3427	13.01	13.1384	13.632	13.0755	12.8407
ALS2	11.5547	11.7425	11.7544	11.5882	11.5866	11.7108	11.6309	11.5859	11.7742	11.6175	11.58	11.7627	11.8269	11.7455	11.5002	11.6861	11.9336	11.7902	11.5884	11.8074	11.9905	11.7622	12.0458	11.7333	11.9323	11.877	11.865	11.7503	11.8109	11.8211
ALS2CL	12.6859	12.1055	12.5369	12.8314	12.0795	11.4642	12.0985	11.5609	11.9199	13.0407	12.1839	12.7949	11.37	12.5664	11.696	12.1234	11.9131	11.9598	12.4305	12.3448	11.3848	13.4275	13.0533	12.8933	13.2535	12.8771	13.2285	13.2723	13.3097	12.8201
ALS2CR12	7.96417	7.31305	7.78457	7.68057	7.4534	7.04905	8.63007	7.45764	7.62697	7.86241	7.67408	7.6967	7.4448	7.78845	7.86136	7.73299	7.97351	7.69831	7.53153	7.906	7.846	7.91673	8.13857	7.97987	7.90439	7.95948	7.61463	7.62256	8.02511	7.38574
ALX1	6.77669	6.47356	6.51359	7.02201	6.85026	6.55728	8.18373	7.29226	7.91673	6.74492	5.95039	6.017	7.04425	6.63112	8.06881	7.51081	6.84655	7.57538	8.16833	7.02748	7.11268	5.68927	5.10728	5.8761	4.48404	5.06252	5.4061	4.60565	5.93494	2.36515
ALX3	7.97578	8.138	8.21661	7.79255	8.04808	8.00819	8.21294	8.07257	8.00985	7.76111	8.01723	8.21092	7.71751	7.97351	7.79255	7.77261	8.25849	7.91756	7.92768	8.10879	8.50837	8.38695	8.56212	8.33407	8.46793	8.14072	8.33033	8.4238	7.91479	8.44847
ALX4	6.19627	5.6916	5.55064	6.15424	5.5531	5.81846	6.51314	6.14495	6.47914	6.48078	6.28829	6.36301	5.71497	5.55732	6.6144	5.45154	6.08669	5.49322	7.51437	6.73212	6.41452	5.45154	6.41967	6.09884	5.9195	6.23473	5.88542	6.70603	6.26869	6.151
ALYREF	9.30925	9.40598	9.22385	9.41699	9.68793	10.2106	9.47554	10.0721	9.70084	9.36865	9.29241	9.12972	9.51807	9.18577	9.4358	9.2786	9.61903	9.81409	9.55372	9.26257	9.9407	9.18598	9.00993	9.33069	9.21748	9.23499	9.21273	9.302	9.36842	9.49677
AMACR	9.20736	9.43818	8.78965	8.86286	8.80809	9.73648	7.47511	9.05912	9.19973	9.27802	9.11228	8.44673	9.30167	8.61293	9.16506	8.16533	9.26747	8.26412	9.53942	8.99374	8.92618	8.34599	8.72136	8.80055	9.20736	9.35623	9.31926	8.95017	9.41765	9.11861
AMBP	7.99822	8.58864	8.98637	8.35644	7.84641	8.68289	8.05028	8.32712	8.533	8.3343	8.66482	8.77534	8.7091	8.48151	7.88886	8.32063	9.68875	8.22753	9.20988	8.93342	9.09361	8.31788	8.87254	8.75851	7.97666	9.04713	9.91681	8.30278	9.93649	9.15923
AMBRA1	11.9008	11.9379	11.7329	11.8286	12.0282	11.543	11.9514	11.9085	11.8001	11.8896	11.9397	11.8746	11.7687	11.902	11.916	11.8987	11.6823	11.6054	11.9399	11.902	11.5163	11.8033	11.7523	11.8507	11.8097	11.8341	11.7363	11.8838	11.8708	11.6228
AMD1	11.2775	11.0715	11.1752	11.0972	10.9591	11.2857	11.2148	11.1726	11.3075	11.3374	11.0547	11.1811	11.1961	11.0114	11.0917	11.3811	11.3497	11.4206	11.4657	11.1727	11.0148	11.1399	11.4379	11.1784	11.0112	11.2284	11.1084	11.1534	11.1783	11.6166
AMDHD1	8.43877	8.49777	9.24394	8.4351	7.51179	8.59201	6.41967	7.59977	8.31657	8.55984	8.06187	9.01322	7.77935	8.32156	7.11216	7.56873	9.62625	8.44689	6.78284	8.42119	8.82361	9.26627	9.41178	9.56385	9.35658	9.47751	9.13093	9.15955	9.12982	9.62304
AMDHD2	10.7665	11.5179	11.3251	11.2872	10.7386	10.7917	10.649	10.8203	10.888	10.9775	10.682	11.1967	10.5321	10.9945	10.5567	10.2121	11.205	10.8166	10.0626	11.1965	10.487	11.0768	10.8145	10.9784	11.0372	11.2272	11.1969	11.1467	11.3365	10.8942
AMER1	10.9428	10.8315	11.0367	10.8834	10.8142	10.6187	11.133	10.9768	10.7589	10.7894	10.9042	11.2896	10.9524	11.0289	10.7442	10.8795	11.1615	10.9816	10.7562	11.2989	11.2346	11.1035	11.4208	11.0892	11.083	11.0181	11.115	11.0838	11.0219	10.8601
AMFR	13.3709	13.2909	13.1925	13.1435	13.1225	13.3824	13.6243	13.1103	13.4745	13.5514	13.3442	13.2306	12.3926	13.3304	13.1142	13.1546	13.3062	13.2078	13.7475	13.3364	13.2041	13.2909	13.4237	13.2529	13.4659	13.3756	13.2345	13.5078	13.3793	13.2765
AMIGO1	9.52786	9.30271	8.98984	9.30271	8.94286	8.87522	9.61513	9.19912	8.92752	9.33394	8.88853	9.56911	9.03182	8.90519	8.93667	9.20832	9.49704	9.36078	8.9678	9.56748	9.32187	8.99363	9.4309	9.48001	9.22842	9.12911	9.5042	9.1411	9.10835	8.84748
AMIGO2	8.36762	8.15135	8.68413	8.45796	8.18162	8.57016	7.6075	8.33717	8.66762	9.02316	8.49893	8.73743	7.91591	8.63043	8.17264	8.37662	9.01669	8.61005	8.21396	7.62931	7.41518	9.09412	8.79018	8.97456	8.92288	8.76172	8.89469	8.61966	8.73779	9.10611
AMIGO3	9.25755	9.4305	9.47487	9.37709	9.58464	8.20958	9.82096	9.2911	8.83587	9.22651	9.43098	9.42408	8.95295	9.65295	9.29914	9.06691	8.73779	8.62572	9.39575	9.41253	8.22485	9.29525	9.08894	8.99814	9.11833	8.97165	9.16542	9.35658	9.26612	8.93517
AMMECR1	9.45671	9.31482	9.18108	9.31625	9.40698	9.33481	9.5561	9.28484	9.4309	9.39284	9.58638	9.38507	9.37709	9.16654	9.55811	9.53986	9.25698	9.36677	9.70299	9.33536	9.15496	9.35489	9.29241	9.34623	9.31113	9.46457	9.63914	9.35658	9.53001	8.79066
AMMECR1L	10.8333	10.9167	10.8061	10.7293	10.9926	10.9046	11.0875	10.9756	10.936	10.9121	10.8542	10.8181	11.1164	11.0029	10.9166	11.1091	10.8646	10.8224	11.1121	10.9969	10.9319	10.6479	10.9049	10.7585	10.6498	10.7476	10.6171	10.9087	10.7304	11.011
AMN	12.2135	12.7621	13.1524	13.1216	12.0527	12.4665	10.8604	11.9584	12.1171	12.3106	12.1741	13.0662	12.4467	12.6168	11.6879	11.2037	13.1384	12.2857	10.9468	12.9387	12.0852	13.3208	12.7075	13.6761	13.5758	13.4753	13.5422	13.4522	13.5803	13.172
AMN1	7.86241	7.64546	8.2789	7.90492	7.35831	7.86036	7.58422	7.77187	7.64458	7.90671	8.05617	8.23638	7.31305	7.69325	7.75737	8.11601	8.32063	8.00611	7.48737	7.76635	8.15247	8.59996	8.49116	8.39237	8.33304	8.43226	8.25667	8.24391	8.50093	8.47438
AMOT	11.9336	12.0023	12.3247	12.0647	11.7718	11.7081	11.1484	11.5704	11.8648	12.0004	12.1232	12.169	12.0514	11.9058	11.6923	11.8939	12.0023	11.7471	11.6288	12.1225	11.9934	12.4486	12.4327	12.3876	12.2079	12.2921	12.2862	12.149	12.2164	12.1779
AMOTL1	12.6286	12.6339	12.2278	12.3281	12.9281	12.8867	12.7582	13.0732	12.8793	12.4915	12.6404	12.2192	12.7721	12.5195	12.6709	12.9063	11.9843	12.6013	12.8051	12.4721	12.6129	11.8733	11.927	11.8791	11.9495	11.8163	11.7985	12.0332	11.7877	11.8592
AMOTL2	13.1306	13.0407	13.0491	13.2826	13.0774	12.8115	13.112	12.9872	12.9864	13.4837	13.3122	13.0445	12.2575	12.8966	13.2381	12.9855	12.5513	12.9935	13.2078	12.3024	12.8908	13.1318	12.5627	13.1208	13.2295	13.2723	12.6372	12.3918	12.5011	13.2885
AMPD1	9.18108	4.18413	3.80996	8.19314	4.60763	5.0596	6.55223	6.47914	5.86623	1.97649	6.41618	4.38589	8.84193	7.19416	7.63949	7.09373	3.50923	6.89141	3.63976	6.93402	5.46241	6.10507	3.42115	7.50924	3.04014	4.31694	1.61608	3.76738	2.01244	5.63849
AMPD2	11.5636	11.688	11.3945	11.5599	11.7074	11.1936	12.2377	11.4752	11.4401	11.5362	11.6494	11.4891	11.4413	11.6558	11.8574	11.4112	11.1967	11.282	12.0263	11.53	10.747	11.3715	11.4219	11.3222	11.6307	11.4366	11.5573	11.5457	11.3156	11.3519
AMPD3	10.67	10.7045	10.293	10.7869	11.0399	10.2148	11.3125	10.8497	10.7079	10.9337	10.733	10.9054	10.7215	10.7292	11.1305	10.8654	10.3683	10.5093	10.4629	10.718	9.71941	10.5599	10.7585	10.6171	10.5173	10.9847	10.6683	10.4503	10.803	10.4605
AMPH	7.54282	6.80271	7.25365	7.48952	6.67335	6.85248	7.44418	7.32887	7.12194	7.57475	7.25783	7.83448	6.79497	7.29917	7.54349	7.47065	7.64792	6.6058	8.07508	6.46296	7.17516	7.82794	8.20929	7.97987	7.92832	8.08304	8.17196	7.38162	7.60499	7.70042
AMT	11.145	10.9909	11.3562	11.3068	11.0484	11.1128	10.7406	10.6679	10.6876	10.7333	11.0023	11.3302	10.9214	11.0515	10.9909	10.8909	11.8439	11.1327	10.611	11.2918	11.3496	11.3884	11.4689	11.5118	11.2594	11.4247	11.4874	11.1831	11.394	11.0257
AMY2B	10.4485	9.9934	10.774	10.2193	9.54195	9.90945	9.86354	9.69389	9.87887	9.75602	9.97576	10.2871	9.81879	10.0228	9.70951	9.95323	10.3575	10.074	9.54983	9.91397	11.2459	11.5035	10.956	10.9302	10.9429	10.5006	9.95631	10.3349	10.5091	10.2342
AMZ1	8.23266	8.56599	8.67184	8.22515	8.66482	7.82729	8.03396	8.40921	8.1806	8.28474	8.10902	8.35237	8.19062	8.38172	8.25627	8.4705	8.39179	8.34324	8.41562	8.35594	8.64976	7.93808	8.32163	7.95076	8.20213	8.05808	7.93808	8.82739	8.15285	8.53322
AMZ2	10.6492	10.4518	10.9123	10.6827	10.3956	10.9169	10.3195	10.5271	10.6795	10.558	10.5631	10.7578	10.84	10.4829	10.6387	10.5624	11.3053	11.1084	10.3133	10.717	11.5211	10.7852	11.0621	10.9998	10.7735	10.977	10.9169	10.6908	10.8484	10.8501
AMZ2P1	8.04777	8.31947	8.00738	8.34896	8.03225	8.36416	7.69402	8.16412	8.11646	7.83302	8.21129	8.30812	8.29056	7.84579	8.25627	8.25647	8.19737	8.3783	7.73175	7.85389	9.44565	8.10328	8.05097	8.1071	8.27155	8.18904	8.24699	7.56153	7.95145	7.88165
ANAPC1	11.4517	11.2979	11.3273	11.4088	11.4832	11.3465	11.3826	11.3806	11.3662	11.3742	11.4372	11.358	11.3517	11.3719	11.4816	11.5611	11.3168	11.5705	11.5359	11.222	11.3069	11.3293	11.4325	11.2588	11.333	11.3728	11.2537	11.3133	11.3165	11.2475
ANAPC10	7.84811	8.11601	7.93607	7.52472	7.77063	8.3093	7.1864	8.07257	8.15097	7.95552	8.00887	7.91707	8.19062	7.48661	7.67542	7.78232	8.41941	8.23094	7.97776	7.60499	8.64024	7.98693	8.3068	8.09383	8.17094	8.00467	7.91756	7.78071	7.98306	8.2604
ANAPC11	9.69071	10.0089	9.85749	9.54961	9.91122	10.6898	9.62288	10.273	10.0562	9.75077	9.59496	9.87912	9.85338	9.44443	9.62046	9.40752	10.3205	10.1835	9.67105	9.87367	11.1939	9.62918	9.55079	9.5882	9.67955	9.64708	9.81533	9.76986	9.86232	9.74085
ANAPC13	9.8894	10.1844	10.2156	10.1124	10.0514	10.9488	9.97416	10.2536	10.5784	10.5681	10.2764	10.1776	10.3948	9.98553	10.2666	10.5219	11.0497	10.9907	10.4116	10.1733	11.3916	10.531	10.7354	10.3195	10.3601	10.4548	10.6088	10.3327	10.3579	10.6176
ANAPC15	7.29341	7.239	7.57654	6.90822	6.67335	8.15549	6.6651	7.49256	7.53391	6.94357	6.84317	7.30333	7.38785	6.94247	7.12565	7.0701	8.09324	7.7168	7.19825	7.07214	8.04146	7.20917	7.77063	6.86804	7.15384	7.30127	7.24353	6.51452	7.23862	7.44378
ANAPC16	11.8352	11.5799	11.7971	11.6802	11.8427	12.2011	11.8486	11.8161	11.9788	11.7299	11.7722	11.7518	12.0085	11.589	11.6751	11.9	12.1668	12.3041	11.6429	11.9236	12.4591	11.853	11.8671	11.7399	11.6773	11.741	11.8377	11.7051	11.6641	11.6112
ANAPC2	11.2964	11.4846	11.4735	11.4728	11.4023	10.8522	11.5488	11.2543	11.0389	11.2826	11.3589	11.5046	11.0338	11.5053	11.3254	11.0646	11.1606	10.819	11.2944	11.3661	10.6378	11.459	11.2889	11.3824	11.4993	11.4148	11.3876	11.4639	11.3501	11.3901
ANAPC4	9.74671	9.47855	9.74201	9.8738	9.35318	9.46437	9.6731	9.5434	9.67689	9.7388	9.96584	9.66539	9.57523	9.5389	9.75185	9.8526	9.5018	9.78692	9.65956	9.37923	9.69727	10.0097	9.91146	9.87255	9.69482	9.82295	9.76403	9.65487	9.45838	9.74523
ANAPC5	12.2363	12.1093	12.1347	12.1842	12.1485	12.455	12.1187	12.19	12.2556	12.025	12.0633	12.1443	12.2288	12.1782	12.2049	12.1038	12.3271	12.3146	12.0717	12.0062	12.3266	12.1053	12.1516	12.0443	12.0178	12.0353	12.0787	11.9921	11.9756	11.8659
ANAPC7	11.0948	11.0094	10.9969	10.9942	11.163	11.1573	10.828	10.9705	11.1197	11.1673	11.1534	11.009	11.061	11.0925	11.0357	11.1017	11.0541	11.0179	11.414	11.0211	10.7162	10.8864	10.8941	10.7764	10.7396	10.8658	10.8058	10.8688	10.8531	10.8454
ANG	7.4506	7.86207	7.45439	6.90822	7.13598	8.52592	6.08703	7.89128	7.79048	7.08527	7.98766	8.17396	7.87015	7.74733	7.16427	7.22527	9.03751	8.05923	7.20824	7.46721	8.49648	7.30047	8.28539	7.97987	7.46721	7.94902	8.0257	7.99586	7.70471	7.72856
ANGEL1	11.1321	11.2161	11.1206	11.1058	11.213	10.7666	11.1277	11.1103	10.8895	10.9568	11.0558	11.0631	10.9651	11.0175	11.1471	11.118	11.1228	10.8735	11.2323	11.163	10.9865	11.2855	11.2703	11.015	11.3041	11.1678	11.0105	11.2319	11.1332	10.9007
ANGEL2	10.5314	10.3701	10.5935	10.493	10.5042	10.4564	10.4727	10.4576	10.5394	10.5334	10.443	10.4412	10.6262	10.537	10.6035	10.5713	10.5539	10.7465	10.1707	10.4536	10.5498	10.6786	10.6276	10.5353	10.4373	10.6624	10.4762	10.4532	10.4754	10.3581
ANGPT1	9.31456	9.38436	10.0301	10.0267	9.47448	8.78195	10.0717	9.23268	10.099	9.27424	9.46173	9.82439	8.97284	9.72381	10.2961	9.81251	9.40619	8.99592	9.77042	9.4861	9.52401	9.89264	9.67581	9.86218	9.24341	9.71165	9.09771	9.43486	9.79651	9.54533
ANGPT2	8.78965	8.23803	8.2948	8.76855	8.34367	8.24735	9.17813	8.35521	8.2282	8.55984	8.83601	8.43129	8.89339	8.93374	8.49359	9.17606	8.19138	8.63018	9.39575	8.29351	8.7765	8.65975	8.68289	9.06006	8.82361	8.13298	8.62544	8.39806	8.09417	8.62604
ANGPT4	6.19627	5.05347	5.9712	6.0339	5.00902	4.67496	6.55223	4.61306	5.49939	4.24059	6.08287	5.59529	4.60763	6.02927	5.40755	5.91501	4.44522	5.45828	5.6916	6.08876	4.45879	5.2262	5.49322	5.74624	7.45223	5.20297	6.06462	4.41617	3.86436	5.1327
ANGPTL1	9.2696	8.74358	9.23499	9.62867	8.67455	8.26483	8.74287	8.60181	9.17518	8.81714	8.88294	8.90493	8.77279	9.10158	8.86657	9.42081	9.14158	9.30804	8.44815	8.96072	8.58435	9.24176	9.67248	9.61266	9.39743	9.19055	9.46064	9.04835	9.2196	9.22774
ANGPTL2	10.8123	11.1483	10.6795	10.6864	10.8631	10.3007	11.0044	10.862	10.7624	10.3937	10.4947	10.9307	10.6477	10.8589	10.7379	10.7121	10.038	10.5349	11.0922	10.9285	9.88677	10.1329	9.93458	10.2895	9.98914	10.0906	10.1668	9.89178	10.0409	10.1579
ANGPTL3	9.97664	9.89969	11.656	10.1679	8.49777	9.34996	6.6651	7.71619	9.39156	9.8217	9.72032	10.4213	8.46192	9.80485	8.1257	9.01906	11.0944	9.20713	7.75305	9.82096	10.5365	10.9274	11.2012	11.0486	11.0079	11.031	10.4065	10.348	10.1631	11.3143
ANGPTL4	6.79497	9.31998	7.49396	7.02201	6.94643	8.29165	8.77894	7.15574	7.10776	7.20661	6.79477	7.32763	8.5889	8.71518	6.9913	7.29731	7.35167	6.68622	8.90309	8.5226	7.09816	8.26536	8.00887	7.45316	8.73398	7.88303	8.60303	8.39286	8.29768	8.19743
ANGPTL6	5.81104	5.44034	4.98258	6.23759	5.8864	5.16094	6.02553	5.5356	5.54391	5.83293	5.56923	5.19988	5.59529	6.50899	5.69104	6.42447	5.24194	5.28446	6.00247	6.12437	4.95662	4.97558	5.49322	5.69287	5.80224	5.45981	5.45688	5.75794	5.64721	5.56656
ANGPTL7	7.9556	8.42281	8.2789	8.57702	8.43087	8.50878	7.88355	7.99488	8.18745	7.98659	8.21129	8.28966	8.12089	8.58536	7.91535	8.48625	8.06536	9.30506	7.76204	8.10879	7.63928	7.93065	8.2282	8.5401	8.37843	7.72984	7.92768	8.23585	8.17042	8.35208
ANGPTL8	7.47785	8.27915	7.98452	7.72004	7.41859	6.4935	7.69402	7.12422	7.00998	7.99234	7.4333	8.05496	7.45365	7.84579	7.29893	7.54914	7.32496	6.63899	8.07077	7.78476	7.29917	7.93808	7.66164	8.35831	8.56369	7.31305	7.83302	7.89554	7.97077	7.92768
ANK1	9.43652	8.82412	7.72004	7.90492	9.06022	7.90365	10.3921	8.76537	8.16504	8.5197	8.27686	7.6477	8.51687	7.85772	8.42302	8.77663	7.37683	8.24459	7.67202	7.41558	7.51346	7.43693	6.81815	7.53339	7.18445	6.61904	7.69796	6.72224	7.35885	7.28648
ANK2	15.1677	14.2149	14.9516	14.2218	14.8088	14.2304	12.3405	14.9076	15.1892	14.6228	14.4839	15.3167	14.4701	14.5167	13.1158	14.8679	14.4993	14.0304	13.4089	15.0919	14.5342	15.2168	15.0795	15.4597	15.4288	15.1768	15.4597	15.0354	14.6952	14.9076
ANK3	13.9481	13.813	14.2382	14.2304	13.8178	13.7699	13.6017	13.7274	14.0103	14.1153	14.2744	14.2854	13.9315	14.0802	13.6475	14.0492	14.1576	13.8716	13.2201	14.2744	14.0074	14.2933	14.6539	14.1725	14.3027	14.4162	14.3084	13.9343	14.3117	14.0949
ANKAR	8.87424	8.52915	9.13581	9.14552	9.04505	8.77357	9.10632	8.94325	9.06533	8.89394	9.10483	8.96602	8.93129	8.90012	8.79953	9.13913	9.08835	9.2696	8.50428	8.87156	9.15496	9.16732	9.29582	9.05666	8.78195	9.14158	8.94693	8.93824	9.00362	8.75563
ANKDD1A	8.93166	8.94659	8.95695	9.28361	9.06573	8.48912	9.15028	8.76121	8.65363	8.77125	8.80671	8.742	9.05766	9.10158	8.95414	9.2659	8.27015	8.65294	8.76429	8.62411	8.12284	8.80089	8.44624	8.64783	8.57691	8.52808	8.17196	8.37689	8.22543	8.89717
ANKDD1B	8.83717	8.92894	9.34996	8.60561	8.52044	9.32845	9.13622	8.47883	8.90049	9.28873	8.68244	8.98927	8.92094	9.08514	8.99906	8.57523	8.86269	8.98256	8.91025	9.01433	9.39522	9.03998	8.99461	8.64211	8.62438	9.11072	9.02376	9.1258	9.25391	8.78529
ANKEF1	8.94651	8.74358	8.60237	8.61747	8.44706	8.75683	8.59556	8.65533	8.87002	8.83488	8.8784	8.7265	8.73848	8.50571	8.58453	8.3571	9.13601	8.39678	8.9678	8.85797	8.05409	8.75235	8.98537	8.80544	8.61512	8.89631	8.96015	8.79857	8.89259	8.71917
ANKFY1	12.7621	12.7677	12.5627	12.6253	12.8758	12.6101	12.9868	12.8953	12.7804	12.6885	12.7718	12.6082	12.7089	12.7638	12.746	12.8402	12.4705	12.699	12.7243	12.6076	12.6186	12.5213	12.4835	12.4318	12.4256	12.4812	12.4847	12.5457	12.3977	12.2799
ANKH	11.8238	11.5852	11.7062	11.5768	11.8475	11.4648	11.8993	11.6902	11.6923	11.4925	11.5547	11.5982	11.7722	11.8318	11.7479	11.9177	11.7565	12.0048	11.4832	11.6899	11.7808	11.4871	11.7269	11.8735	11.5345	11.7026	11.6589	11.6941	11.612	11.647
ANKHD1	6.81139	6.16618	6.96489	7.30361	6.74052	6.68414	7.20294	6.70825	6.93096	6.88857	6.99777	7.21421	7.30183	6.80175	6.62962	7.10746	7.30127	7.00932	7.02175	7.06057	7.31953	7.48261	7.83215	7.71639	7.67577	7.46848	7.52233	7.50428	7.16978	7.70042
ANKIB1	12.6079	12.4658	12.6492	12.5136	12.4556	12.6362	12.2811	12.5222	12.5859	12.4124	12.5219	12.6122	12.6613	12.4003	12.4076	12.4006	12.9785	12.8577	12.1171	12.5987	12.8678	12.6085	12.8802	12.5706	12.6006	12.6756	12.7654	12.4137	12.5216	12.5413
ANKLE2	11.9598	11.893	11.6303	11.7615	11.9802	12.0726	12.2296	12.0746	11.8879	11.707	11.8168	11.6896	12.0835	11.8419	11.9873	11.9148	11.7004	12.0133	12.3448	11.7499	11.9999	11.5555	11.611	11.4669	11.4411	11.4338	11.4768	11.5194	11.4122	11.6684
ANKMY1	10.0483	10.0516	9.8911	10.5418	10.3564	9.62534	10.8465	10.4524	9.73459	10.1634	10.2783	10.1327	10.3187	10.3517	10.3781	10.3759	9.4829	9.81409	10.2478	10.2513	9.59353	10.0939	10.1067	9.74523	9.77269	10.1171	10.1737	10.2945	9.8217	9.4429
ANKMY2	9.70206	9.58863	9.89333	9.72198	9.63664	9.63606	9.69515	9.0784	9.81141	9.57906	9.79444	9.64171	9.68156	9.50265	9.5246	9.63759	9.89933	9.5531	9.51196	9.43156	9.61279	9.63129	10.0797	9.58238	9.87078	9.85431	9.95049	9.61629	9.83566	9.58271
ANKRA2	9.19022	9.02691	8.89142	9.21346	9.04198	9.07762	9.39184	9.31149	9.08387	9.06328	9.26747	9.11371	9.42746	9.19912	9.18051	9.32845	9.16349	9.3398	8.90559	9.00861	9.55059	9.17054	9.42125	9.29261	9.37013	9.37315	9.22857	9.25153	9.20654	9.06965
ANKRD10	12.1808	12.0906	11.9276	12.1073	12.3452	12.2591	12.4032	12.2825	12.2156	12.0369	12.0869	11.9608	12.4545	12.1609	12.2521	12.3412	11.8238	12.1483	12.4261	12.2385	12.1991	11.9725	12.0043	11.7759	12.0423	11.859	11.8694	11.8453	11.7662	11.9532
ANKRD11	12.8896	12.8314	12.7085	12.9823	13.0265	11.83	13.2909	13.0455	12.6557	12.6777	12.7573	12.7174	12.5238	12.8357	12.9604	12.8021	11.9549	12.4184	12.8937	12.7971	11.7891	12.7045	12.3611	12.6609	12.5602	12.5383	12.7646	12.6763	12.7162	12.5425
ANKRD12	11.8544	11.5286	11.973	11.9749	11.2829	11.2124	11.8227	11.7488	11.6909	11.6105	11.6455	11.6042	11.6988	11.7184	11.5806	11.8072	11.3562	11.9311	11.1841	11.2745	11.6511	12.033	11.8495	11.8518	11.7984	11.8361	11.8192	11.4891	11.6288	12.1731
ANKRD13A	11.6786	11.3975	11.2267	11.4182	11.5929	11.5159	12.241	11.6708	11.8027	11.5879	11.5644	11.4312	11.764	11.5823	11.6232	11.7509	11.15	11.5454	11.8659	11.5792	10.9016	11.383	11.4076	11.1989	11.4113	11.2543	11.3224	11.4733	11.2297	11.562
ANKRD13B	8.21494	8.35623	7.56485	8.18097	8.4217	7.72676	8.63815	8.37662	7.73032	7.83302	8.01723	7.7056	8.00383	7.62059	8.33033	8.08769	7.15992	7.48012	8.74563	7.87338	6.39155	7.28277	7.07186	7.2964	7.27045	7.0612	7.28597	7.38162	7.35885	7.23703
ANKRD13C	10.4559	10.4097	10.4588	10.4865	10.4241	10.2238	10.3543	10.4418	10.3575	10.6139	10.4446	10.5735	10.3282	10.544	10.5038	10.3031	10.455	10.3398	10.4729	10.4272	10.4252	10.6299	10.5968	10.3562	10.7443	10.6923	10.5542	10.64	10.5896	10.6191
ANKRD13D	10.6768	10.7825	10.244	10.8684	11.1051	10.4746	11.6515	11.0563	10.7321	10.5349	10.6376	10.4564	10.7907	10.8786	11.0165	10.7465	9.85178	10.5642	11.085	10.6055	10.1882	10.2874	9.85772	9.88206	9.98221	9.94767	9.98612	10.24	10.0465	9.89408
ANKRD16	9.04354	9.00078	9.10536	9.1014	8.96072	8.58839	8.86332	8.86785	8.81908	8.70568	8.85815	9.07609	8.91709	8.87554	8.95414	8.74237	9.20169	8.67583	8.85246	8.96435	8.95216	8.91354	9.14712	8.90508	9.02385	8.94029	9.04409	9.03777	9.26612	8.53322
ANKRD17	13.5783	13.4031	13.4522	13.4915	13.4659	13.3147	13.527	13.5128	13.4944	13.4761	13.5912	13.4944	13.5579	13.4958	13.5783	13.7293	13.3824	13.4789	13.5668	13.4175	13.1374	13.5028	13.6105	13.4659	13.4761	13.4659	13.5043	13.4761	13.4714	13.362
ANKRD18A	8.31005	7.9342	8.04096	8.22515	8.04073	8.13893	8.50416	8.19576	8.04831	8.34554	8.5635	8.58804	8.56518	8.45105	8.36054	8.18347	8.66336	7.84494	8.82318	8.32367	6.96358	8.53255	9.08282	8.43201	8.85328	9.02529	8.89941	8.50539	8.36054	8.42508
ANKRD18CP	7.09986	7.57754	7.61101	7.22481	6.57863	7.21047	5.41845	6.32124	6.82158	7.19779	8.0391	7.15574	7.1348	7.18537	6.16983	7.8045	8.4051	7.47107	6.35233	7.3067	5.28491	8.17986	7.74589	8.32629	8.69071	7.82046	6.94876	7.79007	7.06614	8.02044
ANKRD19P	7.85475	8.0601	7.84021	7.95235	7.90943	7.79486	8.1145	7.92635	7.82559	7.92679	7.73951	7.61718	8.18412	7.8965	7.68222	7.8045	7.86336	7.64052	7.76204	8.36879	7.65082	8.19099	7.74589	7.99435	7.9693	7.56873	7.28597	7.63701	8.09417	8.03165
ANKRD2	9.51537	8.18097	7.57654	7.6388	7.66224	8.32037	6.32728	7.49256	7.06983	7.67345	9.02529	6.76699	7.62973	6.35233	7.22577	7.71576	7.28246	8.08987	8.44815	7.19813	8.87605	6.82451	7.04494	6.16735	6.61904	6.26188	7.58659	6.9175	7.27509	7.08494
ANKRD20A4	4.21229	4.65824	0.945074	6.15424	4.60763	4.3679	6.14881	4.90646	6.03255	4.67254	0.485447	5.47205	2.24214	5.28491	4.98946	4.3963	7.21572	0.451356	5.88542	4.91161	5.10163	6.07677	0.419361	6.40115	6.1625	3.29209	5.9294	0.397764	6.03765	1.70581
ANKRD20A5P	7.03338	7.00227	6.38217	7.04599	7.00421	6.10478	6.83932	6.57662	6.28829	5.9195	6.66524	6.85248	7.34515	5.69049	6.77443	7.05911	6.49416	6.27611	6.71809	6.91509	6.50673	7.38853	7.19941	6.69361	7.10848	6.64165	7.05364	6.49583	6.96415	5.35747
ANKRD20A8P	3.63323	6.80271	7.36198	1.38128	4.95501	2.15825	5.30572	2.24214	0.397764	5.68805	5.91066	2.37677	5.6537	6.61858	4.18413	3.20749	3.96924	2.24214	0.607276	2.96068	5.69049	7.40087	7.51413	4.50339	7.27045	7.43405	4.91423	6.3892	7.86136	6.52152
ANKRD22	6.63219	5.59384	6.411	5.8428	5.86623	6.62471	6.6058	6.38121	6.82158	6.46922	6.23181	5.98414	5.71497	7.29917	6.05517	6.67335	6.26528	6.35939	6.21137	6.75171	7.189	6.28829	6.55319	7.10776	6.76459	6.54748	6.47356	7.42737	7.13308	7.63701
ANKRD23	11.2182	9.17297	9.12095	9.2696	9.58656	8.69244	9.62288	9.25377	9.03684	8.91516	9.16066	9.26179	9.16542	9.4512	9.04314	9.11132	8.93478	8.7303	9.17923	9.36997	8.85404	9.00009	8.93667	8.88248	8.87801	9.0139	8.98684	9.13428	8.96241	8.37073
ANKRD24	8.16944	8.07907	9.53184	8.62466	7.84641	7.4017	8.04185	7.24661	7.96846	8.66412	8.54303	8.95695	7.95023	8.85542	7.78254	7.8045	8.87212	7.77218	8.00853	9.27454	8.25096	9.4919	9.04169	9.29261	10.049	9.50765	10.1549	9.60056	9.96123	9.17661
ANKRD26	10.7185	10.2088	10.7611	10.4089	9.87912	9.69537	10.4252	9.90465	10.0699	10.1582	10.3568	10.5707	10.218	10.0825	10.0267	10.0708	10.2166	9.94129	10.057	10.2647	9.76088	11.1847	11.3465	10.785	10.973	10.9566	11.1671	10.4667	10.7666	10.7859
ANKRD27	10.9678	11.1718	11.0791	11.1895	11.2958	11.0838	11.5059	11.3256	11.1927	11.1647	11.2142	11.0457	11.206	11.2462	11.1277	11.2718	11.0527	11.2745	11.1381	11.2472	11.0715	11.135	11.3835	11.1456	11.1546	11.1253	10.8955	11.1319	11.128	11.1915
ANKRD28	11.5244	11.2015	11.4678	11.3779	11.2341	11.3436	11.6927	11.141	11.4226	11.4695	11.601	11.4895	11.3327	11.2908	11.6224	11.6509	11.3661	11.5038	11.5952	11.2826	11.1467	11.647	11.64	11.4046	11.5942	11.5167	11.5005	11.5911	11.4312	11.515
ANKRD29	7.17368	7.85461	7.77743	7.45439	7.61269	7.98381	6.96049	7.79754	8.28309	7.60312	7.23048	7.63843	7.75989	7.50694	7.15165	6.92843	7.45477	7.78302	7.7096	7.48952	8.26692	7.73114	7.51413	7.38272	7.01687	7.63449	7.78668	7.59197	6.36574	8.09487
ANKRD33B	13.0192	13.266	12.9166	12.9142	12.8009	13.2895	11.9487	13.0533	12.9151	13.5288	13.0251	12.8609	12.8402	12.4727	12.0616	12.7721	12.4241	12.9846	11.9964	12.81	13.693	12.4773	13.0251	12.6404	13.2275	13.1783	12.6094	13.4888	13.1158	13.0722
ANKRD34A	6.65791	7.12288	6.99734	7.17768	7.20349	6.90599	7.13218	6.97671	6.80175	6.59425	6.5803	6.82685	7.22618	7.0914	7.11216	7.18445	6.82705	6.98531	7.08231	7.00733	6.79186	6.62108	6.25036	7.18537	6.84655	6.28765	6.3569	6.66374	6.80271	6.79635
ANKRD34B	5.90237	6.10152	6.96489	6.12703	5.76193	5.98339	7.5011	4.09245	5.96259	6.28313	5.91066	7.36553	4.13381	6.86964	5.89621	7.54914	5.10532	5.98376	7.92768	2.96068	2.01244	6.41147	3.00058	4.00371	6.35975	6.18115	6.90662	4.79176	4.76395	7.9056
ANKRD35	5.5699	6.21811	5.40755	6.10084	5.99472	6.68414	6.08703	6.80906	5.37697	6.28313	4.87509	5.1523	6.94776	5.96034	6.12902	6.47438	5.92971	7.14195	5.49652	5.60995	6.77137	5.09899	5.10728	5.32096	4.20448	5.06252	5.35747	3.97823	5.41921	4.96465
ANKRD36	11.1765	10.8123	11.0244	11.3273	11.262	10.1496	11.4562	11.426	11.113	10.9191	11.3915	11.0913	11.5692	11.309	11.5295	11.4806	10.8203	11.3609	11.2024	10.8631	10.6417	11.3045	11.3075	10.8931	10.768	10.6768	10.5563	11.0731	10.7284	10.6344
ANKRD36B	9.81141	9.56801	10.8806	9.91792	10.287	9.74554	9.52201	10.7694	10.324	9.6521	10.0132	9.7162	9.46008	9.92686	9.45919	10.0215	10.2341	9.80694	9.91587	10.167	9.1289	10.6933	10.6581	9.15403	10.4606	9.58602	10.1961	10.9819	9.63139	9.94937
ANKRD36BP1	9.22468	9.23216	9.69973	9.50056	9.15567	8.92691	8.94567	9.27306	9.54324	9.91071	9.61937	9.50643	8.97836	9.55882	8.96517	9.64218	9.47429	9.27802	9.12834	9.20057	9.70206	10.0939	9.79195	10.0593	9.81318	10.1065	9.74897	10.2983	10.1782	10.2889
ANKRD36BP2	5.62066	6.8793	4.98258	9.31356	6.42836	8.5603	8.69177	9.06337	8.00985	5.9195	7.90045	5.44034	9.94359	8.41398	9.10452	8.41169	5.79941	7.77218	6.81086	8.99374	8.8643	5.74772	5.10728	7.46688	4.34684	4.16013	4.25235	4.31495	4.35932	6.03049
ANKRD36C	11.0561	10.9316	10.7369	11.0418	10.9332	10.4638	11.2504	11.0733	11.0608	10.6479	11.1009	10.8972	11.2029	11.1134	11.2191	11.2066	10.3393	10.9453	10.6674	10.6376	10.4379	11.0566	10.8095	10.7281	10.7111	10.6373	10.7464	10.6041	10.5149	10.7335
ANKRD37	6.88374	7.11055	7.0137	6.5803	6.50588	7.86036	7.4017	7.44265	7.2212	6.74492	6.99777	6.76699	7.46542	6.82705	6.84351	7.01996	7.61833	7.30964	7.06983	7.50082	7.25783	6.66123	7.36703	8.14821	8.41916	7.51805	7.55415	7.40811	7.11312	7.81208
ANKRD39	8.29578	8.38471	8.04096	8.28627	8.55534	8.73207	8.09281	8.64742	8.37131	8.25726	7.91059	7.99504	8.26298	8.06982	8.21784	7.89365	8.52294	8.65624	8.22571	8.38772	8.56694	8.15153	8.122	8.22784	8.41253	8.16862	8.20336	8.48043	8.49622	7.83302
ANKRD40	11.457	11.3609	11.3251	11.3554	11.2887	11.5159	11.4008	11.3981	11.4658	11.6232	11.2243	11.2676	11.4331	11.3941	11.3254	11.7269	11.4219	11.3137	11.5221	11.4034	11.4117	11.3774	11.3949	11.3858	11.415	11.3943	11.4075	11.3467	11.3492	11.5466
ANKRD42	10.0483	10.1251	10.1661	10.1894	10.1079	10.2577	9.97694	9.97956	10.1498	10.1048	10.3769	10.1898	10.3506	9.96891	10.0212	10.01	10.4048	10.1077	10.3215	10.2951	10.0835	10.3421	10.4164	10.3477	10.4128	10.5402	10.4126	10.3603	10.4979	10.2342
ANKRD44	11.1195	10.7709	10.4962	11.2402	11.6706	10.7684	11.9925	12.0039	11.299	10.564	10.9885	10.7058	11.72	11.4845	11.6065	11.7148	9.94517	11.908	10.5979	10.7156	10.6955	10.3694	10.2803	10.6116	10.3744	10.1464	9.99776	10.425	10.1478	10.3892
ANKRD44-IT1	8.20836	8.14533	7.70602	8.17396	8.89273	7.81878	9.05472	8.86785	8.42925	7.64052	8.06951	7.68765	8.92828	8.82221	8.90463	8.97535	7.01629	9.02	7.91379	7.70389	7.65082	7.48261	7.84561	7.89197	7.43788	7.48117	7.31681	7.67993	7.37268	7.98481
ANKRD45	6.86682	7.88634	6.93192	6.84222	7.16656	7.42784	7.28554	7.88495	8.04096	7.51346	7.70389	6.85248	7.41994	7.25014	7.41947	7.49438	7.0317	7.68466	7.70141	7.26122	7.62193	7.45968	7.39015	6.86804	7.00227	6.66336	7.33502	6.64127	6.73716	6.67058
ANKRD46	9.43254	9.39639	10.1083	9.79132	9.19279	9.56954	9.17583	9.28706	9.65272	9.7607	9.93868	10.2196	9.4116	9.8242	9.48833	9.40312	10.455	9.72049	9.13963	9.89253	9.80292	10.3703	10.6106	10.5032	10.2602	10.5241	10.1173	10.1246	10.275	10.2494
ANKRD49	8.05431	8.00038	8.2111	8.16412	7.83372	8.07508	7.96016	8.00099	8.06816	7.9374	7.85606	8.03764	8.43201	8.16876	8.15135	8.40042	8.17619	8.5916	8.20987	7.95145	8.37001	8.12111	8.23563	8.1071	7.88385	8.34896	8.24699	8.0124	8.08691	8.06982
ANKRD50	11.0132	10.9287	10.9052	10.8959	11.0576	10.9129	10.7298	11.0474	11.113	11.2052	10.9842	10.8739	10.9548	11.0069	11.0315	11.3741	10.4768	11.1231	11.349	10.5493	10.7929	10.9353	10.8576	10.5695	10.6052	10.6341	10.5825	10.7789	10.6843	10.8643
ANKRD52	12.9362	13.1267	12.8043	12.9425	13.1588	12.1302	13.3415	12.9776	12.8476	13.0824	12.9622	12.935	12.6811	12.9608	13.0642	13.0085	12.3076	12.4574	13.3364	13.0512	12.3003	12.7319	12.7312	12.6693	12.7677	12.7468	12.6748	12.9667	12.7389	12.6417
ANKRD53	6.02553	7.05953	6.5337	6.54127	6.53249	6.57714	7.14958	7.02322	6.88388	6.97415	6.90599	6.80864	6.72779	7.10031	6.90662	7.0701	7.01629	6.55942	6.766	7.09513	7.5592	6.50952	6.99269	6.48554	5.72836	6.36622	6.86561	6.86316	6.63555	7.3024
ANKRD54	10.027	10.2785	10.2222	9.94476	10.0681	10.3663	9.80957	10.1671	10.1006	10.0778	10.0567	10.1199	10.0134	10.0982	9.96919	9.72833	10.365	10.1171	10.1593	10.167	10.5413	10.1631	10.1418	9.98875	10.0986	10.0308	10.1312	10.1128	10.1852	9.98193
ANKRD55	6.69536	6.66044	6.78477	6.0045	6.17508	6.74052	5.97015	6.79412	6.1968	6.15908	6.62316	7.18226	6.56625	6.21884	7.02322	6.06504	7.06057	6.74893	5.63008	6.21008	7.24325	7.38853	7.49256	7.59977	7.03244	6.86682	7.53339	6.81337	6.48342	6.55223
ANKRD6	10.2718	10.4134	10.0816	10.1856	10.4683	10.4332	10.807	10.2891	10.2933	10.1816	10.2627	10.4332	10.2378	10.2528	10.2685	10.537	10.2028	10.0794	10.384	10.4081	10.2777	9.92828	9.92397	10.1723	10.1857	10.2226	10.3059	10.1225	9.99687	10.0072
ANKRD61	8.09605	7.92742	7.81829	7.79255	7.83372	7.70169	8.05028	7.4671	7.63449	7.66776	7.76828	7.68765	7.42834	7.92679	7.88886	7.71576	7.97351	7.80467	7.96333	8.00467	7.57286	8.06525	8.05097	7.73732	7.81515	7.9195	7.9964	7.9342	7.79486	7.41186
ANKRD62P1-PARP4P3	4.77498	5.62066	5.69488	4.90646	5.13615	5.50163	6.44101	4.90646	5.89621	6.59425	5.26484	5.19988	4.75248	4.71371	5.36803	6.52083	6.62346	6.14036	5.65738	6.96229	3.9105	6.93402	7.25783	6.16735	6.80738	6.47191	7.20161	5.75794	6.48342	5.63849
ANKRD63	4.11861	6.56099	7.5549	7.37551	5.5531	5.42134	6.32728	6.03837	5.7197	5.94614	5.56923	8.35237	5.26484	6.80175	5.9256	5.68805	8.37812	6.01628	4.10311	7.19813	6.58362	7.15781	7.70169	7.78052	7.41407	8.41121	7.25783	7.469	7.11312	7.3508
ANKRD65	6.82665	7.50428	6.51359	7.42249	7.75372	8.39428	7.74036	7.63903	8.25426	7.79561	7.7993	7.55316	6.65272	6.89314	7.9308	7.70656	8.04777	7.43693	7.93976	7.54847	8.07045	7.59469	7.41637	7.66989	7.46721	7.63449	7.58659	7.29941	7.72728	7.39886
ANKRD9	10.0097	9.98837	9.91376	9.68179	9.75397	9.91118	9.90264	9.59628	9.67331	9.54893	8.92944	9.70492	9.05552	9.44	9.15654	8.4705	10.0025	9.1909	9.79638	9.75419	9.46173	9.46086	9.72239	10.178	10.189	9.92057	10.3059	10.6349	10.3735	10.2586
ANKS1A	12.2597	12.2185	12.3006	12.3029	12.3111	11.7603	12.2771	12.2264	12.1069	12.2949	12.157	12.3206	12.0973	12.2899	12.1779	12.2753	11.9999	12.0496	12.0837	12.3778	11.8692	12.249	12.3682	12.2855	12.2955	12.1628	12.1501	12.3	12.1397	12.2663
ANKS1B	9.62046	9.47615	10.1502	9.99379	9.39313	9.60169	8.8883	9.16654	8.9994	9.47763	9.58835	10.2598	9.53129	9.40032	9.47631	8.78612	10.833	9.84095	8.28063	9.79687	9.94633	10.3649	10.7812	10.3477	10.3288	10.9966	10.7541	9.76773	10.6722	10.1703
ANKS3	10.74	10.8555	10.823	10.7893	10.9068	10.6403	10.8681	10.5981	10.5185	10.6827	10.7305	10.6898	10.4734	10.6371	10.6588	10.4027	10.7515	10.5943	10.649	10.733	10.6296	10.7152	10.5614	10.4552	10.5641	10.5257	10.5785	10.5581	10.7072	10.1812
ANKS4B	9.81387	10.4218	11.0991	10.2158	9.52039	10.4947	8.19099	9.50007	9.63468	10.2373	10.0759	11.1357	10.3611	10.5015	8.92453	9.56482	11.4796	10.4021	8.90559	10.7234	10.7958	10.8576	11.3087	11.2238	10.9155	11.3026	11.2172	11.382	11.1561	11.5373
ANKS6	11.5426	11.4026	11.4167	11.4737	11.4462	11.3803	11.5224	11.1778	11.482	11.7565	11.4403	11.6252	11.1377	11.1212	11.2965	11.2523	11.3254	11.1355	11.7414	11.4301	11.4171	11.3314	11.5167	11.1891	11.3081	11.4104	11.4632	11.4725	11.6962	11.0257
ANKZF1	11.4264	11.2701	11.3877	11.532	11.3782	11.1529	11.544	11.3152	11.253	11.0593	11.4763	11.4907	11.4533	11.4179	11.3077	11.3608	11.3531	11.3838	11.2184	11.3642	11.1177	11.5235	11.4477	11.459	11.4327	11.431	11.4012	11.1527	11.0987	10.8869
ANLN	6.96652	7.24837	6.24415	5.7703	7.42834	7.14813	7.81271	7.13545	7.63449	6.66044	6.75961	4.93646	7.42834	5.82765	7.90539	7.15509	5.74192	6.06462	7.64792	6.58315	6.62376	5.15699	5.40646	4.63467	5.65877	6.36622	5.65949	6.74119	6.48342	5.04993
ANO1	10.9748	10.8256	10.332	10.5	10.5512	9.83272	11.6704	9.90696	10.2818	10.2154	10.7049	9.93671	9.91122	10.8316	12.3608	11.1276	9.09956	9.92898	11.4343	10.4171	9.8213	9.60214	9.11635	9.88417	9.98725	9.29764	9.7274	9.6695	10.2855	9.7388
ANO10	10.9863	11.2409	11.2678	11.1851	10.9676	11.2092	10.8618	10.7747	11.0944	11.2894	11.2012	11.3314	10.9602	11.071	10.9749	11.0233	11.4381	10.8601	11.1624	11.1748	11.4211	11.282	11.428	11.3988	11.301	11.4086	11.3801	11.2977	11.4351	11.2603
ANO2	7.24147	7.96871	7.34063	7.99732	7.54771	7.09188	9.42103	7.45116	8.11646	7.51346	7.89157	8.07535	7.50742	7.89136	7.71252	7.65282	6.73034	8.03055	8.34688	7.98944	8.66482	6.86211	7.21264	7.1239	6.084	6.36622	6.56099	7.01888	6.26869	7.57173
ANO3	8.35222	8.20121	9.18108	8.91636	8.22784	8.4968	6.75476	8.65905	8.30391	8.18981	8.06187	8.80362	8.75737	8.51169	7.65966	8.87086	8.13224	8.2963	6.97989	8.44084	8.97568	9.03998	8.94157	8.79613	9.08811	8.70521	8.46893	8.47582	9.28947	8.76051
ANO4	5.86268	5.48205	5.40755	5.4136	6.62962	7.18143	4.79785	6.96471	7.33979	6.4963	6.44991	6.017	5.9187	6.12545	6.21847	6.09884	7.22652	5.32814	4.97465	7.02748	7.42834	6.62108	4.71707	5.69287	5.44522	5.84066	7.1082	5.5356	7.11312	4.96465
ANO5	10.1059	9.06766	9.51537	9.4795	8.97109	9.35824	8.55919	9.10378	9.5961	10.1772	9.56402	9.67861	9.29987	9.33507	9.20981	8.96602	9.86668	9.05735	9.72016	9.43156	9.52732	10.1902	10.359	9.97488	10.2622	10.2558	10.3408	9.94778	10.2605	9.98656
ANO6	12.7234	12.7697	12.856	12.7203	12.6417	12.7155	12.4815	12.5596	12.8451	12.7635	12.598	12.7835	12.6204	12.8528	12.6582	12.7729	12.9215	12.8283	12.7476	12.74	12.9126	12.8609	13.0234	12.7677	12.7638	12.823	12.6866	12.5505	12.8691	12.7578
ANO7	8.12341	8.29024	8.45407	7.97622	8.11654	6.87983	8.32212	7.64792	7.83541	7.91301	7.9195	7.96576	7.17891	7.84579	8.51202	7.81878	7.58613	7.12982	8.30782	7.85389	6.45365	7.87294	7.94424	7.53339	8.11506	7.75536	8.0067	8.0124	7.57475	7.85415
ANO8	10.4862	10.7577	10.5851	10.7661	11.0399	9.66584	11.5605	10.3568	10.2854	10.6584	10.6113	10.4259	10.2942	10.8458	10.8786	10.437	9.69515	9.49264	11.0082	10.6526	9.42626	10.3185	10.2485	10.3446	10.3374	10.4873	10.4925	10.7466	10.6439	10.2889
ANO9	10.6163	10.9612	10.6654	11.2155	11.2215	10.004	11.1346	10.6486	10.3313	10.4082	10.7563	11.3677	10.218	10.7897	10.7379	10.6093	9.73702	9.99521	10.1879	10.9285	9.55623	10.7489	10.3419	10.3495	10.7057	11.0317	11.0193	10.8331	10.918	10.3504
ANOS1	7.5684	7.24837	7.21421	7.08824	7.22685	7.01209	6.73654	7.14591	7.16829	7.24303	7.25783	7.3892	7.45365	7.48661	7.59152	7.56873	6.80805	7.20206	7.3128	6.96229	8.0024	6.84173	7.21264	7.64832	7.15384	7.04009	7.16427	7.54489	7.48248	7.2555
ANP32A	11.5574	11.6786	11.7622	11.7283	11.461	12.0869	11.2695	11.7425	11.9834	11.6126	11.8831	11.7395	11.8854	11.6823	11.6655	11.754	12.0454	12.1187	11.5405	11.5413	12.0085	11.8498	11.6935	11.7837	11.8161	11.9306	11.8991	11.7608	11.8326	11.7154
ANP32A-IT1	9.77002	9.71933	9.34623	9.45654	10.0638	9.286	10.0679	9.99927	9.46008	9.42905	9.80582	9.6814	9.50765	9.78511	9.77883	10.01	9.42971	9.6823	9.45259	9.68672	10.038	9.75823	9.7697	9.52084	9.51482	9.37648	9.4821	9.73209	9.52075	9.19022
ANP32B	10.9265	11.0257	11.0122	11.282	11.0033	11.5095	11.0179	11.4252	11.3245	10.9835	11.0613	11.0572	11.4768	10.9422	11.2757	11.215	11.3552	11.6486	11.2292	10.9561	11.3638	11.2675	11.0921	11.3765	11.2822	11.1944	11.3549	11.1875	11.2612	11.2758
ANP32E	10.4788	10.1006	10.4372	10.2884	9.60691	9.98324	10.1856	9.89709	10.2282	10.0572	10.4703	10.4424	10.3757	9.90191	10.5071	10.3341	10.1168	10.2156	10.5319	10.1149	9.7131	10.5356	10.4896	10.2856	10.5467	10.5056	10.6074	10.491	10.5019	10.6784
ANPEP	16.1023	16.3246	16.6807	16.2868	16.1982	16.045	14.8205	15.2568	15.6909	16.4858	16.6193	16.6807	15.7322	15.9452	15.376	15.909	16.3555	15.7146	15.017	16.6193	16.4374	16.3555	16.2868	16.1749	16.1982	16.529	16.1363	16.529	16.1982	16.2286
ANTXR1	12.2148	11.8959	11.7599	12.1636	12.5425	11.6916	11.6184	12.4422	12.1294	11.6724	11.9873	11.689	12.06	12.0817	12.3478	12.8373	10.5749	12.3725	11.626	11.6663	11.1678	11.1498	11.0882	11.309	11.1414	10.9234	10.9334	11.1964	11.2323	11.2148
ANTXR2	11.229	11.2671	11.154	11.5663	11.6056	10.8837	11.774	11.4682	11.3741	10.915	10.9602	11.0928	11.4937	11.5735	11.8211	11.7288	10.6233	11.4555	11.1259	11.0382	10.6827	10.8669	10.6255	10.918	10.6201	10.7	10.7018	10.5749	10.9197	10.4956
ANTXRLP1	4.93467	4.10647	5.28367	6.51005	6.50588	4.14485	5.99789	6.65414	4.40247	4.14954	4.98441	4.38589	6.78372	5.93939	6.41004	6.37911	3.50923	6.91999	4.7429	5.15136	4.45879	4.08712	1.19149	4.7337	4.67254	3.61254	3.42513	4.09245	4.03754	5.41845
ANXA1	11.1896	11.4763	10.8593	10.6644	11.411	11.7629	11.276	11.4599	11.8443	10.8194	11.5398	10.663	12.0973	11.3611	11.5205	11.8302	10.3621	11.7761	10.9329	11.0996	11.1908	10.5863	9.93682	9.91792	9.75419	10.3967	10.0733	9.5783	9.70054	10.6423
ANXA11	13.5043	13.4671	13.2057	13.4609	13.5748	13.6206	13.6057	13.6072	13.586	13.6226	13.516	13.3709	13.4482	13.3978	13.6583	13.5113	13.203	13.3402	13.8248	13.5043	12.9527	13.3001	13.203	13.1873	13.2857	13.3136	13.4408	13.5176	13.385	13.3531
ANXA13	4.85774	8.67214	8.80735	8.69994	8.74597	8.95559	7.65493	7.15574	8.92752	8.92317	8.32212	8.77067	9.38158	7.76828	7.72103	7.71576	6.58079	7.79754	6.21137	8.46214	8.47463	9.05121	4.80418	7.93209	8.63815	9.00078	9.47887	6.53297	8.01582	8.77996
ANXA2	13.1458	13.305	12.3016	12.7971	13.4237	13.9846	13.1051	13.5834	13.7274	12.9409	13.1379	12.2415	13.7067	12.9608	13.7517	13.4188	12.3519	13.524	13.7577	12.6828	13.0917	12.2678	12.005	11.5965	11.8526	11.5264	11.9213	11.8752	11.8413	12.2166
ANXA2P1	7.14769	6.98822	6.65302	6.86211	6.96301	6.68414	6.89314	6.51415	6.76885	7.00181	7.37075	7.0791	6.31187	6.78629	7.25783	7.28301	7.32496	6.90643	7.70141	7.04647	6.37196	7.14633	7.57607	6.90853	7.24481	7.0612	7.05364	7.40811	7.23862	6.67058
ANXA2R	6.73654	6.27342	6.38217	7.22481	7.76227	7.38175	7.32915	7.57885	7.205	6.48078	6.96768	6.44699	7.83372	6.74573	7.40811	7.45005	6.49416	8.10793	6.84524	6.73212	6.86211	6.16141	6.2275	5.98339	6.54699	6.00247	6.58609	5.8864	5.64721	5.88469
ANXA3	9.55525	9.62953	8.87332	9.19114	9.61658	10.2831	9.9455	9.52478	9.95413	9.92686	9.76773	9.00993	10.0592	8.80876	10.0895	9.93946	8.73489	9.76458	10.605	9.64327	9.16976	9.05774	9.02295	8.53412	8.7531	8.79368	8.89941	8.87672	8.59939	9.29864
ANXA4	12.3575	12.7832	12.5319	12.4294	12.517	13.2835	12.0737	12.8226	13.0876	12.6859	12.6731	12.3106	12.9039	12.0862	12.4594	12.3855	12.782	12.5554	12.8727	12.7457	12.937	12.3524	12.2751	12.0423	12.3365	12.2532	12.055	12.2573	12.401	12.2651
ANXA5	12.5847	12.6544	12.3908	12.5457	12.7542	13.2048	12.215	13.0146	13.224	12.8483	12.7625	12.3464	12.9663	12.6372	13.1435	12.8758	12.3595	12.782	13.2626	12.4612	12.4354	12.2473	12.4057	12.249	12.0763	12.1736	12.1822	12.2011	12.0985	12.2475
ANXA6	12.7909	13.0274	13.2068	13.123	13.095	13.2218	12.6984	13.2255	13.2078	12.9974	13.0533	13.0201	13.2615	13.4031	13.1198	12.9552	13.0543	13.1886	12.8324	12.935	12.8623	12.8681	12.8398	12.7701	12.9375	12.6516	12.8528	12.9612	12.9273	12.8302
ANXA7	12.4422	12.5004	12.6079	12.3744	12.3857	12.9331	12.0607	12.2763	12.6125	12.5655	12.5155	12.5277	12.7545	12.4401	12.3431	12.4363	12.8419	12.6548	12.6516	12.5231	12.5123	12.5061	12.5581	12.4526	12.4397	12.5129	12.6358	12.3843	12.598	12.4098
ANXA9	10.5831	10.8743	11.0265	10.8916	10.2506	10.6356	10.8237	10.6438	10.7817	11.0821	10.5086	11.1529	10.3436	10.7218	10.5236	10.5994	11.453	10.6117	10.3596	11.0408	11.0935	11.0687	11.1694	11.0715	11.1208	11.2108	11.0006	11.2009	11.1895	10.7555
AOAH	10.1173	9.99138	9.70845	10.267	11.266	10.0267	11.3779	11.7554	10.9247	9.50765	10.504	9.65969	10.9656	11.1098	11.6537	11.0869	8.95581	10.4873	10.2152	9.92478	9.80744	8.62962	9.62776	9.29261	8.92288	9.43761	9.20859	9.6192	9.11704	10.3156
AOAH-IT1	5.94218	5.72776	5.73857	6.23759	7.31819	6.00863	7.20294	7.60883	6.46522	5.44414	6.75961	5.59529	7.30183	7.12371	7.39786	7.08231	6.1194	6.25888	5.94367	6.29519	6.01362	4.50409	6.95562	6.13536	5.39328	6.28765	6.38549	6.95375	6.39196	7.54489
AOC1	15.2428	11.7329	15.8575	15.017	13.4569	14.4247	12.1026	13.3538	12.8669	14.387	14.2896	15.4166	14.3496	15.3597	13.615	13.5607	15.6909	14.2659	12.5943	15.29	14.6062	15.8845	15.1677	15.4428	16.045	16.3976	14.6824	14.3027	15.8845	15.6078
AOC2	7.35445	7.61101	7.90344	7.59869	7.58001	7.06319	8.05028	7.71619	7.29731	7.83302	7.67408	7.79048	7.55349	7.93361	7.33798	7.66224	7.75401	7.33474	8.08783	7.96008	7.82268	7.93065	8.24699	8.05858	8.22784	8.06454	7.69796	8.28309	8.13224	8.46192
AOC3	11.2701	11.9033	12.1267	12.1978	11.9641	10.3065	11.16	11.4415	11.5109	11.1559	11.0048	11.6577	11.0054	12.2143	11.7983	11.9816	11.058	11.5897	11.2578	11.7024	11.3314	11.187	10.4055	11.7992	10.3526	11.2461	10.6642	11.0472	11.6309	10.9286
AOC4P	5.81104	6.14115	6.96489	6.68378	5.83514	5.0596	5.97015	5.69488	5.06746	6.18391	6.20094	7.0791	5.94728	6.86964	5.76304	6.65243	7.18847	5.83356	4.67141	6.49494	6.96358	6.84173	7.51413	7.31037	6.70154	7.56873	7.02905	6.97142	7.35885	5.41845
AOX1	14.2579	13.8295	14.814	14.4247	13.8493	14.1153	12.0976	12.6616	12.7498	14.5438	14.2659	13.9872	13.6667	13.7148	13.3836	13.6683	14.2304	14.2933	12.9988	13.979	14.4162	14.6178	15.2774	14.2218	14.9794	13.5176	14.3265	14.3117	14.387	14.1122
AP1AR	9.36601	9.51632	10.0424	9.64453	9.21492	9.36372	9.22753	8.9785	9.16732	9.47417	9.44044	9.62239	9.60595	9.51888	9.22577	9.28259	10.0283	9.35387	9.12115	9.51983	9.44746	9.95478	10.2649	10.1121	10.3147	10.2803	10.0435	9.90826	10.0946	10.3728
AP1B1	12.9346	13.214	13.0331	13.0846	13.1151	12.7193	13.0501	12.7498	12.8686	13.0197	12.8865	12.8875	12.8491	13.0662	13.0522	12.9482	12.7322	12.5584	13.1374	13.0418	12.1845	12.8068	12.7436	12.7463	12.8437	12.8056	13.001	13.0304	13.0336	12.851
AP1G1	13.0045	12.9963	13.0093	13.0685	12.9401	12.9122	12.6273	12.9207	13.1384	13.2466	13.2626	13.1216	12.9474	13.0691	12.9264	13.1849	13.0481	13.0388	12.9366	12.9712	13.0369	13.2417	13.4888	13.228	13.2699	13.3215	13.2048	13.413	13.2	13.5197
AP1G2	11.1636	11.0222	10.9335	11.2338	11.3238	10.5331	11.6202	11.0616	10.7266	10.8988	11.2434	11.2177	10.9595	11.3205	11.2392	11.2762	10.3153	10.4962	11.2562	11.2182	10.3088	10.9134	11.0911	10.7753	10.941	11.014	11.0438	10.8724	10.8146	10.6743
AP1M1	11.5192	11.667	11.9442	11.803	11.4981	11.6439	11.0642	11.1634	11.3603	11.6613	11.481	11.8552	11.4199	11.8912	11.3156	11.3064	11.7461	11.5057	11.2989	11.5386	11.5781	11.7597	11.6391	11.9298	11.8708	11.7653	11.8219	11.9524	12.1133	11.6942
AP1M2	10.8965	10.8315	10.6376	10.5597	10.6548	11.5494	10.7917	10.3342	11.0104	11.0831	10.7884	10.8104	10.7573	10.6155	10.8955	10.6859	11.707	11.2011	11.5095	11.171	11.9301	10.8613	10.8841	10.789	10.6602	11.0586	11.3985	10.9899	11.5587	10.8426
AP1S1	10.4293	11.0838	11.1896	10.6689	10.5574	11.5636	9.65167	10.8946	10.8823	10.717	10.3711	10.4302	10.3136	9.71663	10.2843	9.82726	12.0237	10.5448	10.1971	10.8572	11.9135	10.6244	10.7205	10.6558	11.0869	10.1912	10.7651	10.7961	10.3401	10.431
AP1S2	8.5257	7.88062	8.25807	8.18097	8.30523	8.49333	8.59556	8.74268	8.976	8.28474	8.4286	8.09777	8.55049	8.61293	8.55166	8.65117	8.2919	8.67906	8.43956	8.01909	8.69544	8.53798	8.34192	8.49777	8.20213	8.3343	8.23411	8.23585	8.25607	8.81005
AP1S3	9.1337	8.87748	8.4604	8.71877	9.39054	9.50098	10.0922	9.12773	9.51212	9.41897	9.5975	8.9389	9.24176	8.85833	9.63373	9.76904	8.89119	8.80735	10.5717	9.24123	9.18628	8.5039	8.769	8.74382	8.9596	8.61747	9.0625	9.06006	9.02869	9.11212
AP2A1	12.2627	12.5777	12.2221	12.3475	12.432	12.0454	12.3801	12.1661	12.101	12.3643	12.257	12.3423	12.0759	12.4329	12.2551	12.011	12.0312	11.8776	12.3486	12.256	11.7416	12.1757	12.0219	12.2143	12.0668	12.1834	12.2143	12.3855	12.334	12.1769
AP2A2	13.1725	13.0886	13.1935	13.3659	13.1384	12.6512	13.1633	13.0278	13.0205	13.0917	13.2677	13.2404	12.8706	13.1599	13.1568	12.9322	12.8247	12.6821	13.174	13.1078	12.4601	13.1477	13.2666	13.2068	13.186	13.1844	13.2567	13.2626	13.1306	12.8491
AP2B1	13.963	13.9402	13.7684	13.7865	14.0162	13.805	13.9732	13.8153	14.0557	14.0825	14.1396	13.7949	13.9515	13.8178	14.0198	14.1766	13.6301	13.7205	14.1879	13.8739	13.6035	13.7577	13.8269	13.487	13.5983	13.6182	13.6401	13.6379	13.5899	13.5651
AP2M1	13.2057	13.4217	13.1789	13.2255	13.4549	13.7843	13.2422	13.616	13.6418	13.305	13.2765	13.1297	13.5043	13.2122	13.305	13.2504	13.3327	13.4671	13.4643	13.1975	13.5078	12.9516	13.0691	13.0628	13.1267	13.0555	13.0613	13.0837	13.1021	13.0732
AP2S1	10.5467	10.8431	10.4248	10.4033	10.7653	11.4297	10.4755	11.185	10.9225	10.6218	10.3034	10.3851	10.5119	10.3422	10.5724	10.2262	10.9305	11.0152	10.649	10.5534	11.6232	10.2522	10.2079	10.3138	10.3449	10.3387	10.3188	10.4886	10.5126	10.2976
AP3B1	11.4909	11.3334	11.7914	11.5904	11.3049	11.0999	11.1182	11.0826	11.4885	11.6296	11.8149	11.6263	11.379	11.5574	11.549	11.6545	11.4211	11.3429	11.4832	11.3725	10.9993	11.9478	12.0233	11.9429	11.9048	11.8756	11.9311	11.7516	11.8366	11.8111
AP3B2	7.40976	7.12288	7.06153	7.30361	6.88263	7.36591	6.83932	6.96471	7.24495	7.61635	6.90599	7.0791	6.31187	6.89314	6.9913	6.89641	7.61172	6.65302	8.2345	7.39786	6.75171	7.36591	7.00858	7.63928	7.50924	7.73769	6.97115	7.51505	7.81878	8.51564
AP3D1	13.4066	13.8956	13.3793	13.6278	13.5388	12.945	13.4362	13.3442	13.2	13.5718	13.4569	13.4201	13.0829	13.5402	13.3187	13.2935	13.0969	12.9401	13.5176	13.4557	12.6909	13.386	13.3761	13.3876	13.4643	13.3767	13.454	13.6493	13.6357	13.5702
AP3M1	10.7185	10.6822	10.8367	10.7025	10.7412	10.4842	10.4414	10.5501	10.6448	10.8122	10.8609	10.8	10.6862	10.9074	11.0031	11.0291	10.6899	10.5713	10.9518	10.5972	10.552	10.8911	10.7431	10.8015	10.707	10.8816	10.7784	10.717	10.839	10.8728
AP3M2	10.4449	10.2643	10.4441	10.513	10.4071	10.1747	10.2224	10.27	10.2804	10.4802	10.5056	10.5005	10.6592	10.5155	10.2396	10.2957	10.5492	10.5116	10.2593	10.5119	10.29	10.4421	10.6027	10.4166	10.3583	10.3559	10.5051	10.2646	10.4397	10.1384
AP3S1	9.17661	9.10179	9.25429	9.06337	9.11606	9.85506	9.13219	9.38192	9.43278	9.27945	9.09014	9.08548	9.38409	9.07786	9.11916	9.18128	9.5556	9.87354	9.16562	9.14763	10.2377	9.45071	9.16368	9.40312	9.33748	9.17404	9.10378	9.08415	9.08623	9.55059
AP3S2	7.00181	6.98822	7.13308	7.32314	7.13598	6.62471	6.89314	7.30627	6.74742	6.74492	6.79477	6.92972	6.89353	7.08231	7.00322	7.12034	7.09314	6.40628	6.70154	7.09513	6.73228	7.00199	7.30517	7.05364	7.01687	7.11985	7.38013	7.28648	7.34612	6.84317
AP4B1	9.01415	8.90073	8.96258	9.13471	9.2918	9.02958	9.30905	9.18698	9.23082	8.89394	9.11639	8.87822	9.42444	9.33097	9.25224	9.40095	9.0351	9.41473	9.15118	9.0703	8.92094	8.94931	9.16368	8.77597	8.59834	8.73147	8.76453	8.5404	8.7985	8.63521
AP4B1-AS1	5.76477	5.83852	5.65552	5.8761	6.17508	5.32507	7.07398	6.59404	5.33381	5.28367	6.14264	5.76391	5.98222	6.0045	6.05517	6.42447	5.65949	6.17724	6.14911	6.00132	5.22037	5.7881	5.79941	5.49652	5.39328	5.76536	5.79529	5.82252	5.79192	6.06504
AP4E1	9.56748	9.53733	9.67901	9.53927	9.55004	9.65295	9.54321	9.67275	9.76692	9.84256	9.71857	9.66997	9.81318	9.77157	9.72518	9.99633	9.60214	9.85939	9.76219	9.64327	9.95193	9.94296	9.96487	9.66817	9.64287	9.58223	9.75109	9.86703	9.77604	9.70547
AP4M1	9.64465	9.46859	9.4198	9.49627	9.54508	9.71539	9.60887	9.59368	9.54324	9.50765	9.72528	9.43773	9.46799	9.46064	9.61176	9.4546	9.32825	9.18515	9.74214	9.69286	9.61279	9.31796	9.37648	9.35505	9.30612	9.23499	9.48691	9.2541	9.2196	9.35607
AP4S1	10.0857	9.98457	9.99765	10.179	10.3857	9.92828	10.362	10.1467	10.0318	10.2452	10.2627	10.362	10.0202	10.1265	10.1833	10.3341	10.176	9.90237	10.1281	10.1251	10.1193	10.0374	9.95296	10.223	9.82024	10.137	10.1246	10.0401	9.82707	10.0736
AP5B1	11.9467	12.1983	12.0968	11.9427	12.1101	11.4866	12.458	11.9512	11.6318	12.1012	11.9136	12.2296	11.7912	12.0361	11.7922	11.9104	11.8398	11.6112	12.006	12.2528	11.3295	11.9399	12.0951	11.8778	11.8985	12.0198	11.9572	12.227	12.1774	11.8947
AP5M1	10.703	10.5141	11.0805	10.7105	10.475	10.6403	10.2341	10.3105	10.7404	11.0692	10.7749	11.0034	10.4838	10.6834	10.5326	10.5966	11.0249	10.743	10.6738	10.6685	10.6916	11.2158	11.3483	11.1208	11.1253	11.1875	11.0699	11.0944	11.1162	11.2114
AP5S1	9.71983	10.041	9.77269	9.63057	9.69071	9.73193	9.58299	9.52039	9.51482	9.88726	9.6359	9.65969	9.32825	9.5266	9.67634	9.42484	9.63743	9.14804	9.80824	9.76044	9.08177	9.56552	9.28824	9.52967	9.18861	9.61235	9.6916	9.92417	9.71692	9.55059
AP5Z1	11.1611	11.5935	11.371	11.598	11.4462	10.7666	11.4464	11.1883	11.1482	11.3298	11.2488	11.3247	10.8211	11.5184	11.2465	11.0061	10.8695	10.7656	11.2872	11.3156	10.1543	11.3322	11.0209	11.3196	11.2679	11.4301	11.2537	11.2883	11.2568	11.3471
APAF1	10.4932	10.2749	10.1013	10.3619	10.6851	10.3188	10.8047	10.9102	10.6276	10.3074	10.606	10.2196	10.6098	10.5501	10.7522	10.8079	9.85006	10.6388	10.4528	10.2205	10.242	10.206	10.0399	10.0328	10.058	10.0619	9.81942	10.0562	10.0109	10.1455
APBA1	9.66817	9.55388	9.36997	9.45654	10.0365	9.64312	9.34019	10.1212	9.88417	9.64385	9.36906	9.48649	9.23821	9.68427	9.61176	9.89553	9.16066	9.31587	9.45856	9.43156	9.48233	9.80158	9.29241	9.65434	9.46173	9.44786	9.22857	9.64974	9.32047	9.48433
APBA2	8.66902	9.14825	7.2904	8.25807	9.08049	8.58411	9.19934	9.18508	8.44544	7.72887	8.1788	7.73695	9.0877	8.66336	9.70531	8.32063	7.28246	8.755	8.36687	7.98944	8.3588	7.38853	6.86719	7.21601	7.80483	7.22025	7.28597	7.22618	6.94403	7.28648
APBA3	10.2678	10.3446	10.2944	10.3874	10.4509	10.1825	10.6041	10.4131	10.0742	10.1663	10.2597	10.3932	10.1703	10.4339	10.2056	9.86877	10.2785	10.0774	10.2635	10.3671	10.176	10.7494	10.1046	10.4119	10.2296	10.3171	10.2785	10.437	10.303	10.1703
APBB1	11.4186	11.5844	11.3137	11.3779	11.3679	11.8898	11.609	11.6313	11.7811	11.5237	11.5075	11.6276	11.482	11.4331	11.3751	11.2907	11.8173	11.5761	11.4676	11.626	11.5545	11.4885	11.4379	11.4637	11.4955	11.6298	11.3707	11.6898	11.3477	11.4382
APBB1IP	10.4155	10.2915	9.77269	10.5698	10.8114	10.0899	10.596	10.6486	10.1262	9.31225	10.4399	9.20285	10.6098	10.4506	10.431	10.5264	7.8196	10.5695	9.34323	9.71539	10.1086	8.89095	8.7168	9.20981	9.1162	8.47663	9.79273	9.64974	9.58583	10.2463
APBB2	12.305	12.0605	12.2448	12.3072	12.2549	11.9611	12.2928	12.0801	12.2051	12.1897	12.2607	12.3198	12.0737	12.4247	12.3059	12.398	12.1014	12.3438	12.3676	12.189	12.0751	12.4393	12.414	12.4608	12.3744	12.2182	12.2243	12.2885	12.2227	12.3062
APBB3	10.5133	10.5694	10.5755	10.7065	10.5428	10.2923	10.8047	10.3861	10.5552	10.3711	10.472	10.5622	10.5829	10.5045	10.598	10.5293	10.3363	10.2812	10.2993	10.5584	10.2597	10.8144	10.3762	10.4793	10.4916	10.4597	10.6228	10.425	10.5654	10.4369
APC	11.9179	11.9082	11.916	11.9249	11.7646	11.7306	12.0032	11.8637	12.0689	11.978	11.9064	11.8884	12.0268	11.9054	11.8932	11.9941	11.8001	11.8927	11.8233	11.7983	11.6163	11.9066	12.0026	11.7911	11.7042	11.8947	11.8615	11.6391	11.8283	11.7653
APC2	9.33363	9.53986	9.54429	9.65167	9.57304	8.42732	9.88964	9.22148	8.79226	9.21287	9.62834	9.43414	8.68351	9.63914	9.4411	9.22504	8.44999	8.30651	9.52497	9.55144	7.96016	9.5043	8.96621	9.49386	9.29921	9.62046	9.31926	9.66323	9.41473	9.17324
APCDD1	9.54893	9.63726	8.5257	9.38017	9.33748	9.97916	9.69117	10.0764	9.01415	8.92861	9.26305	8.4946	9.72032	9.78306	10.5593	9.66184	8.29727	9.36865	11.0246	9.2696	9.26702	7.58532	7.04494	8.28563	7.25839	7.0612	6.88536	8.00358	8.09417	7.80174
APCDD1L	9.04354	8.32235	8.48131	8.81089	8.49777	7.53264	8.9189	7.9814	8.66762	8.26363	9.35318	8.9119	7.09212	9.09174	8.66336	8.69733	8.96709	8.49126	7.48737	8.33441	7.79551	9.28824	9.24105	9.03182	9.27379	9.11643	8.45889	9.32845	9.33661	9.62089
APCDD1L-AS1	7.5684	6.81852	7.64873	7.86558	7.15384	7.02368	7.99246	7.2813	7.75286	6.60827	8.15097	7.92628	5.9187	7.92679	7.31681	7.74283	8.35287	7.92849	5.0756	7.44741	7.48952	8.16617	8.49116	7.83195	8.22178	8.41929	7.24353	8.01958	7.79486	8.98183
APEH	12.6575	12.8538	12.7918	12.7522	12.6024	13.1557	12.3926	12.5816	12.7374	12.8565	12.7041	12.8585	12.699	12.6006	12.5715	12.478	13.0846	12.6984	12.8601	12.8028	12.9086	12.6208	12.8411	12.6382	12.736	12.7363	12.7121	12.815	12.6866	12.6351
APELA	4.77498	4.95501	2.43619	4.31962	4.18743	3.85609	2.65078	3.99247	3.68915	4.74076	3.87915	5.24773	6.13224	2.07837	4.31828	3.62016	6.23861	4.40819	5.97448	4.43732	2.01244	4.65824	3.6964	4.98441	4.84413	4.31694	7.76358	2.69459	5.23721	4.37017
APEX1	11.7074	11.7578	11.6332	11.7746	11.7808	12.4988	11.5192	12.1018	12.027	11.5995	11.7208	10.8604	12.0899	11.4922	11.9226	11.7215	12.0174	12.1782	12.0409	11.6583	12.2428	11.339	11.4808	11.505	11.54	11.5444	11.6044	11.3666	11.4141	11.5095
APEX2	9.97664	10.1534	10.291	9.90527	10.1404	10.4113	9.72912	10.0662	9.9192	10.0086	9.88395	10.1631	10.1175	9.95074	10.0612	10.0129	10.0153	10.1121	10.2518	10.1122	10.487	9.96776	9.89948	10.027	9.89249	9.95309	9.95249	10.4453	10.1121	10.2078
APH1A	12.5742	12.6176	12.4556	12.4231	12.6909	13.1579	12.6492	12.9974	12.9512	12.5248	12.5467	12.5642	12.8542	12.4805	12.619	12.6492	12.8937	13.0146	12.5767	12.6226	13.2234	12.3932	12.3704	12.2526	12.3901	12.3529	12.3823	12.4128	12.4883	12.3116
APH1B	9.71267	9.45435	9.56801	9.64884	9.43002	9.50453	9.65956	9.65692	9.75146	9.79617	9.72763	9.58973	9.32458	9.60056	9.79779	9.99096	9.60521	9.6932	9.4116	9.52681	9.28565	10.15	9.6388	9.66529	9.78321	9.67825	9.77077	9.70146	9.65295	9.47417
API5	11.6353	11.4491	11.7806	11.7096	11.4546	11.4958	11.4976	11.4619	11.652	11.6734	11.6887	11.773	11.6649	11.5428	11.7399	11.7844	11.6866	11.7077	11.7066	11.5005	11.4885	11.859	11.9145	11.8395	11.7842	11.8053	11.8024	11.6706	11.7751	11.8318
APIP	9.05439	8.99559	9.17297	9.02911	8.67949	9.64171	9.14485	9.42103	9.57431	9.09316	9.13983	8.98364	9.59015	8.79051	8.89001	8.92618	9.93868	9.60033	9.13143	9.21194	10.3562	8.63216	9.51732	9.07171	9.09464	8.77894	9.12644	9.01881	8.90508	9.10062
APLF	9.14574	8.69177	8.96258	8.78673	9.06022	9.56954	9.14485	9.44603	9.38815	9.16976	8.98734	8.73743	9.67666	8.79589	9.09437	9.19842	9.05822	9.6664	8.92494	8.92317	10.2536	8.72449	9.19782	8.78965	9.05537	8.98256	8.90493	8.73103	8.95341	8.93517
APLN	8.90943	8.756	8.51802	8.2803	7.29283	8.09605	5.83936	6.76373	8.68974	9.76645	8.19937	8.58804	7.43646	7.8019	7.03491	7.61101	9.80529	8.30149	11.2872	7.89524	8.4821	9.41997	9.15101	8.85562	9.33125	9.23859	9.20234	9.1411	9.40032	9.34668
APLNR	10.3415	10.564	10.3969	10.4912	10.979	10.0078	8.47955	10.2257	10.5442	10.4628	10.7494	10.3239	10.0134	10.7234	9.76628	10.0858	10.3621	9.46677	9.30395	9.34361	9.49323	10.1564	10.7476	10.0707	10.5955	10.5795	10.2319	10.5625	10.456	10.0361
APLP1	6.98192	7.12288	7.59107	7.22481	6.69697	7.76707	6.40067	6.92757	7.56981	8.25726	6.90599	7.57764	6.84881	7.35885	5.5819	6.42447	7.88385	7.20206	6.97989	7.18469	7.15949	8.36416	8.02511	7.93209	7.90439	7.80872	8.12341	8.04974	8.32547	7.81208
APLP2	14.8362	14.9516	15.008	15.0795	14.7851	14.5957	14.3964	14.2933	14.8841	14.9892	15.2428	15.0265	14.9892	14.9076	14.8205	14.9892	14.7699	14.254	14.9794	14.9337	14.2115	15.0919	15.1022	15.0795	15.2011	15.2011	15.0686	15.1677	14.9976	15.0795
APMAP	11.6937	11.8884	11.5182	11.672	11.8493	12.3651	12.0724	12.0654	12.1831	11.8304	11.9075	11.6472	11.9962	11.7387	12.1166	11.9457	11.7479	11.9949	12.2912	11.7912	11.9691	11.4126	11.5332	11.3674	11.503	11.4898	11.4124	11.4285	11.4085	11.3934
APOA1-AS	6.9034	6.54355	6.35793	6.30778	6.26528	6.0333	6.32728	6.09277	6.1625	6.33375	6.36761	6.76699	6.92202	6.55017	6.34809	6.67335	6.47356	6.45365	6.16595	6.08876	7.51346	6.38754	7.33921	5.79601	7.32362	6.59466	6.82298	7.17061	7.18552	6.33852
APOB	7.46338	7.22913	8.33543	6.43954	5.95883	7.34333	6.51314	5.47069	7.55654	5.32016	6.14264	8.28966	6.47379	8.16876	5.69104	6.33083	7.04383	7.25014	6.21137	7.40821	7.14489	8.42805	9.37648	8.2349	8.92288	7.77406	8.52849	9.64974	7.18552	7.9056
APOBEC2	9.43652	7.17103	7.47511	7.34386	7.17563	7.35939	7.63016	7.41518	7.18037	7.07268	7.85606	7.57764	7.1348	7.17699	7.0667	7.56873	7.58613	7.47107	7.12004	7.39786	7.30941	7.35167	8.0174	7.46688	7.79459	7.78582	7.93808	7.73888	7.62931	7.14813
APOBEC3C	8.70555	9.01125	8.28627	9.13017	9.57628	9.015	9.35739	9.75441	9.39543	8.82097	9.17404	8.08304	9.5295	9.56748	9.94175	9.77435	7.85532	9.40354	9.18202	8.71756	8.22485	8.07417	7.66164	8.31228	8.04711	7.94902	7.69796	8.19412	7.58759	8.37073
APOBEC3D	8.77264	8.78205	8.12493	8.97628	9.71608	8.38237	9.50499	9.58156	8.93539	8.28474	8.94795	8.35978	9.21523	9.33964	9.55025	9.05439	7.58613	8.81378	8.67975	8.9543	7.58438	7.77046	7.30517	8.18104	7.3473	7.79732	7.31681	7.99586	7.46761	7.76098
APOBEC3F	9.43254	9.56576	8.74144	9.64884	9.97694	9.16672	9.87213	10.1015	9.53586	9.25678	9.67414	9.42782	9.8032	10.0377	9.91738	9.83346	8.67625	9.26179	9.42804	9.57644	8.91194	8.82937	9.06046	8.9247	8.90309	8.90519	8.59834	9.03777	9.03973	8.71917
APOBEC3G	8.75448	8.56599	8.31235	8.73489	9.67495	9.19842	9.94756	9.77883	9.18098	8.58769	8.62786	8.48196	9.49306	9.28403	9.64202	9.58319	7.57385	9.27306	8.93374	8.53912	8.90131	7.87294	7.32172	7.42937	7.16978	7.20234	7.7193	7.73175	7.34612	7.2555
APOBR	8.21494	8.52044	7.86516	8.69994	9.38325	8.36416	10.432	9.59099	9.03375	7.92679	8.3348	7.65845	9.03182	9.34512	9.4613	9.00974	6.65434	8.53349	8.70965	7.906	7.15949	7.35167	6.60827	7.68057	6.94998	6.8859	7.34967	7.18537	7.45701	7.88165
APOC1	7.76807	7.59358	6.7626	6.0045	8.37379	9.02	7.94866	9.87529	8.87406	6.77211	6.89063	6.07597	8.83203	7.51574	8.1628	7.6722	6.52906	8.55497	6.75171	9.32845	10.3493	5.90302	6.20346	5.8761	6.59404	6.91999	5.5699	8.00358	6.41883	6.67058
APOC3	6.51257	6.39508	8.34769	5.7703	5.28367	7.18143	4.35369	4.61306	7.69021	6.97415	6.23181	8.71877	6.93609	8.33227	3.66637	6.91433	8.24358	6.17724	3.10536	7.42784	9.07069	9.78586	6.68568	9.25459	7.41407	9.74466	8.6789	9.15955	8.77501	8.64857
APOD	9.19022	8.97109	9.45607	9.82008	7.39592	7.57776	6.7735	7.20591	7.76828	9.20322	7.68721	8.94431	7.99822	8.88349	7.9308	8.31408	8.89469	8.71533	10.0159	8.44084	8.87077	9.3502	8.76242	8.66502	8.79277	8.533	8.969	8.12111	9.14041	9.2948
APOE	15.5198	15.8845	16.5824	15.909	15.3167	16.1749	13.6962	15.1892	15.7322	15.6909	15.506	16.2286	15.5715	16.045	14.6018	14.583	16.5824	16.0105	14.2744	16.2286	16.263	16.1363	15.8575	16.4374	16.529	16.5824	16.1982	16.8479	16.6807	16.4374
APOH	7.34063	7.46721	9.37861	9.32765	6.62962	7.57776	3.44756	5.49972	6.70603	8.50164	8.79157	9.27592	7.85475	8.88955	5.21723	7.01996	9.41485	9.31123	4.97465	7.72887	8.59719	10.1404	10.6542	10.7095	9.97936	9.5285	10.5227	9.37357	9.04758	9.95678
APOL1	11.2596	11.5253	11.1515	11.3742	11.7613	11.6788	11.8641	11.48	11.6369	11.739	11.4958	11.2043	11.8178	11.8718	11.9694	11.7898	10.8929	11.494	12.1746	11.2788	11.2035	11.262	10.978	10.842	11.0211	10.8816	10.8203	11.4249	10.8791	10.968
APOL2	11.0398	11.2462	10.8539	10.9538	10.9722	11.2241	11.3261	11.1051	11.0463	11.2119	10.797	10.8224	11.1377	11.1098	10.9764	11.1467	10.8609	10.9396	11.5559	10.9353	11.1399	10.8468	10.8022	10.6234	10.8561	10.7562	10.6202	11.1344	10.6553	10.4218
APOL3	10.5785	10.6626	10.4399	10.9202	10.9805	10.6614	11.2885	11.3174	10.7018	10.3653	10.6465	10.4012	11.1007	11.1408	10.981	11.0335	10.2833	11.065	10.4022	10.253	10.4211	10.2496	10.3105	10.2966	10.2179	9.85165	10.1349	10.0584	9.72518	10.1531
APOL4	6.63219	9.10179	6.35793	6.8146	7.7188	8.66696	8.63007	7.6886	8.03335	7.63352	7.32085	6.6222	7.36263	8.12692	8.18504	7.81878	7.41027	7.63701	8.09417	7.18469	7.66311	6.53062	6.31769	6.34693	6.41004	6.49416	6.58609	7.06336	6.82522	6.52152
APOL6	12.2015	12.508	11.8356	12.1798	12.5909	12.4507	12.7037	12.8904	12.5027	12.3859	12.1668	11.8935	12.8021	12.5909	12.7102	12.7174	11.6717	12.6094	12.5021	12.1942	12.5906	11.7404	11.5235	11.5293	11.6631	11.7689	11.5549	12.2214	11.6106	11.412
APOLD1	8.11438	9.1089	7.8466	7.73114	7.86036	8.38695	7.62016	7.6886	7.87146	8.5655	8.1788	8.21575	8.49777	7.77935	8.34113	8.15144	8.67343	7.76606	8.9785	8.88433	8.07713	7.76147	7.57607	11.0684	11.0133	7.9195	9.35294	10.0256	8.1608	10.8869
APOO	8.75448	8.68539	9.10121	8.48671	8.49069	9.24425	8.21968	8.51079	9.03051	8.90345	8.77125	8.61078	8.75085	8.61293	8.29244	8.46641	9.59628	8.74999	8.81023	9.09239	9.50783	9.2343	9.3018	9.24584	9.38436	9.37013	9.34789	9.06724	9.2196	9.45277
APOOL	10.7215	10.7619	11.2847	10.7636	10.4093	10.1445	10.2027	10.0764	10.4014	10.5943	10.7207	10.7011	10.4424	10.6042	10.2757	10.4554	10.7874	10.4688	10.3422	10.8646	10.1444	11.4259	11.3789	11.4844	10.9424	11.3976	11.492	11.3875	11.0689	11.5953
APOPT1	9.90861	9.83065	9.88226	9.78351	9.90716	10.2718	9.9588	9.9782	10.1299	10.0197	9.95869	9.76955	9.89253	9.76628	9.86232	10.0193	10.09	10.0869	10.1155	9.95913	10.3841	9.94105	10.0026	9.72173	10.1294	9.90264	9.98278	9.8961	9.84375	9.99596
APP	15.536	15.4428	15.3319	15.6909	15.376	15.1022	15.536	14.9696	15.506	15.7788	15.909	15.506	15.4428	15.5715	15.5915	15.5915	14.7925	14.454	16.045	15.536	14.0557	15.3489	15.376	15.1543	15.376	15.3319	15.5487	15.2659	15.3018	15.1892
APPBP2	11.0555	10.8339	11.1192	11.1129	10.8651	10.8445	10.9285	10.9921	11.1785	11.1963	11.1905	11.0715	10.9121	10.9358	10.9963	11.1509	11.1277	11.0035	10.8947	10.8336	11.1357	11.1806	11.5486	11.0601	11.2848	11.3584	11.1832	11.3748	11.1629	11.3611
APPL1	11.1896	10.93	11.0302	11.0707	10.9689	10.9815	11.1125	11.3256	11.2142	11.1582	11.185	11.0928	11.2188	11.0396	11.1821	11.2921	11.0907	11.4341	11.0897	10.9387	11.3173	11.3102	11.3631	11.2097	11.1377	11.2461	11.1489	11.1576	11.1605	11.0642
APPL2	11.6873	11.4426	11.6609	11.7022	11.6551	11.4442	11.593	11.5199	11.6311	11.7216	11.7152	11.7416	11.6098	11.5844	11.6913	11.8472	11.5341	11.5256	11.6706	11.6089	11.1864	11.6649	11.8822	11.5791	11.5171	11.6068	11.6458	11.4725	11.4506	11.4688
APRT	11.3358	11.217	11.2227	11.2077	11.5023	12.2202	11.1868	11.8993	11.5298	11.2665	11.017	11.1567	11.178	11.1011	11.1783	10.7961	11.8743	11.9949	11.4202	11.4788	12.6442	11.1015	10.9225	11.2723	11.1903	11.2652	11.2278	11.2687	11.2336	10.9821
APTR	8.66382	8.69177	8.66717	8.37262	8.78746	8.79066	8.74287	8.47412	8.23638	8.63917	8.75085	8.71877	8.70312	8.69131	8.63521	8.37171	9.03214	8.46952	8.76924	8.61426	8.85404	8.30943	8.6469	8.76361	8.67354	8.59556	8.68529	8.43709	8.50837	8.69356
APTX	10.0422	10.1404	10.224	10.1894	9.8234	10.4426	9.78646	10.1874	10.324	10.0847	10.1424	10.2076	10.3165	10.1549	9.98036	10.2262	10.3221	10.3432	10.1661	10.1719	10.7025	10.0194	10.3397	10.0612	10.1375	10.182	10.207	10.1344	10.1741	10.0595
AQP1	16.0754	16.2868	16.3976	16.1749	15.7788	16.0105	14.9157	15.376	15.6078	16.3246	16.263	16.5824	16.1749	15.8845	15.5715	15.6078	16.7609	15.8575	15.3018	16.3976	16.3555	16.2286	16.529	16.263	16.1363	16.4858	16.1023	16.3976	16.3555	16.4858
AQP11	8.63999	9.05284	9.58547	8.9663	8.78195	8.95277	7.6075	8.25096	8.52808	8.72371	8.70435	9.0382	8.63097	9.00996	8.01008	8.12316	9.66184	8.86078	8.19743	8.93342	9.34652	9.52075	9.54376	9.31507	9.41713	9.48759	9.04948	9.45142	9.42644	9.5919
AQP2	15.1148	15.008	14.8515	14.5717	14.7154	13.9603	16.1982	14.3496	14.9892	12.7522	14.9418	14.6399	14.3117	15.3167	14.0616	14.6952	15.0446	14.5093	12.8491	15.0795	13.2602	14.9337	16.1749	14.1178	15.3597	14.5438	14.9516	14.3541	15.2659	14.3964
AQP3	12.3266	12.3718	12.8933	12.4672	11.8192	12.6061	13.1167	12.0072	12.827	12.0296	12.7516	12.626	11.809	12.615	12.3394	12.0985	13.1262	12.8324	11.4808	12.7758	12.1897	13.0392	13.5514	12.8912	13.2994	13.0304	13.1346	13.0866	13.3595	13.2392
AQP4	8.17774	6.37605	6.08703	6.33875	6.53249	6.52652	6.62535	4.73941	7.38553	8.93559	7.83485	7.75797	6.07366	6.55017	6.30462	6.35793	6.84655	5.74055	7.96333	7.10835	7.12953	8.39345	8.02511	7.46688	7.19597	7.46848	9.08926	6.49583	8.09417	6.03049
AQP4-AS1	5.62066	5.56073	5.32409	5.4136	5.36803	6.26708	6.62535	4.67609	5.82734	5.68805	7.12967	6.34445	5.71497	5.93939	4.78595	5.36274	5.10532	5.24529	6.53964	6.41883	7.35548	6.36715	7.56133	6.64737	6.54699	5.6916	6.13104	6.33875	5.88266	6.5796
AQP5	6.65791	6.6007	6.98176	6.59989	6.47514	6.32472	6.16807	5.9265	6.26013	6.69031	8.34625	6.19279	5.84363	6.99365	5.9256	6.35793	5.83606	5.77088	6.60029	6.05386	6.37196	6.90643	7.22807	7.62758	7.6477	7.84153	7.48117	8.07713	7.62931	8.96668
AQP6	10.145	10.3781	10.8491	10.5344	10.4984	9.59015	10.8661	9.08228	10.714	11.9058	10.8018	11.399	8.79338	11.115	10.0032	10.1673	10.088	9.53205	9.11457	10.3095	9.18628	11.1772	11.0621	11.3104	11.7499	11.7223	11.118	12.0785	11.2495	12.2485
AQP7	10.7691	11.6282	11.3574	11.255	10.7034	10.9091	10.322	10.2121	10.4207	11.1349	10.6731	10.8984	10.4968	11.2591	10.3716	10.1075	11.7846	10.9885	9.66817	11.6095	11.8014	11.336	11.7299	11.4391	11.7639	11.8554	11.7372	11.4124	12.1133	11.7675
AQP7P1	8.00688	8.61948	8.34769	7.83823	7.59086	8.87101	7.47511	7.57885	7.54607	7.87146	8.75085	8.3651	7.9567	8.29578	9.01867	7.76342	9.52022	8.23563	8.22571	8.54717	9.81514	8.00233	8.60237	8.89161	8.42411	8.8	9.41142	7.81256	8.8536	8.29438
AQP7P3	5.81104	7.01209	6.68834	4.40819	5.63388	8.03165	4.17705	6.27549	6.1625	5.87001	5.26484	6.04323	5.48538	4.95501	6.70931	4.81022	8.87212	7.11946	6.02503	7.41558	9.39795	6.23796	7.52378	7.1533	7.07413	7.18537	8.13148	5.97886	7.93976	6.5796
AQP9	7.01658	6.56099	6.63622	6.52584	6.34809	7.11402	10.4518	6.42105	6.28829	7.91301	6.96768	6.70444	6.13224	5.96034	7.0667	6.7628	6.14881	6.31914	8.25096	7.00733	5.15803	6.91926	7.12476	6.81718	7.28367	7.18537	6.92843	7.61172	6.48342	6.8209
AQR	11.515	11.3406	11.4917	11.4958	11.3903	11.2695	11.4199	11.404	11.4215	11.4934	11.737	11.5547	11.4129	11.4146	11.5018	11.6253	11.2863	11.4577	11.549	11.2811	11.133	11.5375	11.7049	11.4708	11.3752	11.4172	11.3985	11.4816	11.523	11.3918
AR	11.4255	11.5432	12.0399	11.9628	11.8818	11.5002	11.5967	11.9487	11.6621	11.2753	12.023	11.935	11.7679	11.8195	11.6805	11.9226	11.6159	12.0162	10.5259	11.8168	11.8092	11.8455	11.5674	11.6959	11.5354	11.5611	11.6725	11.3653	11.3742	11.6727
ARAF	12.0588	12.0811	12.0857	12.0855	12.0867	11.9958	11.9381	12.2067	12.013	12.1561	11.9999	12.0237	11.8698	12.0148	11.9857	11.9796	12.1228	11.9383	12.063	12.1278	11.9482	12.0419	11.9312	12.0529	12.0917	12.1026	12.1154	12.2076	12.1177	12.066
ARAP1	13.1941	13.3364	13.0369	13.266	13.8248	12.5369	14.3027	13.4243	13.1198	13.059	13.0917	13.5621	13.3492	13.5189	13.5028	13.1783	12.425	12.9881	13.5579	13.6834	12.4908	12.9823	12.7789	12.98	13.5899	13.47	13.0582	13.6475	13.0388	12.9608
ARAP2	10.9951	10.5285	10.3266	10.7357	10.939	10.4588	11.2989	11.2073	10.9976	10.9775	11.0512	10.4276	11.0392	10.9322	11.2971	11.1984	10.4088	11.0958	11.0167	10.6223	10.6137	10.8199	10.8884	10.4715	10.6885	10.6479	10.6328	10.8027	10.5111	10.8779
ARAP3	11.0839	11.5065	11.4098	11.3742	11.2121	10.0707	11.5574	10.7734	10.9552	11.396	11.465	11.3778	10.2471	11.5574	11.087	11.333	10.475	10.0696	11.4782	11.0832	10.061	11.5555	10.986	11.424	11.3868	11.0739	11.1955	11.1275	11.3331	11.3038
ARC	4.77498	5.05347	5.49726	4.40819	4.67141	4.24627	6.30665	4.21313	5.37697	5.83293	6.41618	5.44034	4.65065	4.27158	6.21847	5.73197	5.74192	4.18325	6.68676	5.23533	3.80996	6.68676	5.68013	6.75171	6.22067	6.41722	7.00777	7.03374	8.14619	9.33586
ARCN1	12.5021	12.3756	12.5415	12.5927	12.3489	12.2549	12.207	12.267	12.3839	12.5235	12.5639	12.4721	12.4375	12.4798	12.6082	12.6243	12.3823	12.4341	12.6885	12.3954	12.2845	12.4124	12.5041	12.5494	12.3586	12.3992	12.4715	12.3727	12.4545	12.4844
AREL1	12.0635	12.0112	11.8173	11.7433	12.0983	12.1757	12.267	12.1655	12.1237	12.0484	11.9694	11.8891	12.0649	11.8891	12.043	12.2303	11.8814	12.1475	12.2063	11.8852	12.3064	11.7196	11.9359	11.653	11.7281	11.7981	11.7174	11.8307	11.7402	11.698
ARF1	13.3951	13.5009	13.3966	13.4251	13.4391	13.8429	13.3256	13.657	13.687	13.6379	13.4557	13.3525	13.5176	13.413	13.4081	13.3453	13.6357	13.646	13.4659	13.4522	13.6704	13.3801	13.1909	13.3505	13.3466	13.3364	13.4819	13.5147	13.51	13.4161
ARF3	13.3085	13.3525	13.2835	13.3581	13.4237	13.3172	13.4431	13.2331	13.4325	13.5147	13.4789	13.3215	13.413	13.4114	13.444	13.5197	13.3511	13.203	13.6683	13.4259	12.973	13.2857	13.3415	13.2765	13.3647	13.2965	13.2516	13.362	13.2392	13.2821
ARF4	11.1405	11.1853	11.2015	11.3209	11.1362	11.672	10.7578	11.3114	11.3506	11.3677	11.3666	11.1811	11.404	11.0983	11.5417	11.4972	11.4806	11.5978	11.7819	11.0987	11.4589	11.1248	11.2139	11.1357	11.0605	11.0559	11.113	11.2141	11.1895	11.5656
ARF5	11.4675	11.544	11.2437	11.3393	11.7959	12.4975	11.4297	12.0943	11.8991	11.4944	11.4092	11.2498	11.7754	11.2568	11.592	11.4676	11.8117	11.9849	11.7315	11.5219	12.6226	11.1772	11.1001	11.1312	11.1349	11.2389	11.1364	11.3779	11.1458	11.2924
ARF6	11.8215	11.807	11.6373	11.9172	11.9641	12.1315	11.9654	12.2475	12.0878	12.1246	11.9547	11.7135	12.1214	11.7154	12.0254	11.9702	11.7337	12.1516	12.2383	11.6944	11.9023	11.717	11.5421	11.64	11.7204	11.7172	11.6623	11.7486	11.716	12.1149
ARFGAP1	11.9923	12.1815	11.9249	12.0291	12.2259	11.5477	12.2357	11.9411	11.7644	11.9311	11.988	11.9033	11.6437	12.0525	12.1563	11.8652	11.5087	11.454	12.1888	12.0452	11.2118	11.9012	11.6168	11.6585	11.7955	11.8708	11.7771	11.9623	11.8433	11.7206
ARFGAP2	12.1448	12.1535	12.1309	12.1417	12.1606	12.0828	12.2126	12.2361	12.2394	12.0282	12.1967	12.1776	12.1452	12.1925	12.2002	12.1636	12.3455	12.2656	12.1591	12.1834	12.2828	12.0704	12.1704	12.0536	12.0155	12.0484	12.0332	11.9402	12.068	11.8963
ARFGAP3	11.3722	11.4067	11.2896	11.3273	11.1379	11.7034	11.3835	11.2971	11.3957	11.458	11.4038	11.2294	11.6807	11.2969	11.6059	11.4202	11.23	11.2425	12.0466	11.4374	11.2874	11.1857	11.3619	11.1881	11.2679	11.1377	11.0205	11.1659	11.068	11.5021
ARFGEF1	12.9939	12.8051	13.038	13.008	12.8813	12.745	12.9536	12.9273	13.0045	13.1568	13.143	12.9577	12.9387	12.9093	12.9086	13.1031	12.9425	13.0396	13.0261	12.8283	12.9101	13.1415	13.3021	13.0214	13.1463	13.1167	12.9944	13.0795	13.1031	12.9983
ARFGEF2	13.0755	13.0765	13.0188	12.983	13.038	13.186	13.1947	13.2589	13.1612	13.1546	13.1337	13.0179	13.1985	13.095	13.0917	13.1235	13.1624	13.2088	13.1064	13.2444	13.2978	13.0374	13.2857	12.9944	13.1501	13.1088	13.0871	13.1193	13.0732	12.9916
ARFGEF3	10.822	10.7668	9.93369	10.2944	10.7305	10.5172	11.4146	10.5921	10.64	10.8719	10.8088	10.2434	10.4722	10.1668	11.0818	10.7807	10.6134	9.95954	11.7021	10.4256	9.61948	10.6531	10.7431	9.96669	10.781	10.2972	11.1767	10.3988	10.7427	10.0345
ARFIP1	10.1969	9.98837	10.2078	10.1743	9.9579	10.1859	10.119	9.9577	10.1912	10.3103	10.2415	10.0628	10.3921	10.2126	10.1658	10.1173	9.97893	10.1559	10.2566	9.9699	9.86045	10.2992	10.4558	10.2095	10.1952	10.2916	10.338	10.1464	10.1937	10.197
ARFIP2	11.0948	11.07	11.1145	11.0326	11.0321	11.5884	11.0702	11.1801	11.2158	11.0886	11.0338	11.1752	11.2417	10.9811	11.0472	11.0566	11.5254	11.2211	11.2062	11.2231	11.6065	10.8449	11.0259	11.0272	11.1156	11.0765	11.0219	11.1721	11.0878	11.2475
ARFRP1	10.9376	10.9887	10.9278	11.0808	11.2608	11.0001	11.1851	11.1206	10.961	11.0709	10.9999	11.1456	10.759	11.1353	11.1358	10.8303	10.8966	11.0429	11.1338	11.1024	11.0423	10.9707	10.772	10.918	10.866	10.9169	10.8732	10.9404	10.8791	10.8643
ARG2	10.7478	10.9462	10.8688	10.2834	10.2824	11.1287	10.2252	10.5183	11.2494	10.8778	10.8006	10.8809	10.6068	10.384	10.1476	10.853	11.4046	10.4923	10.628	11.1553	11.4411	11.0279	11.6511	11.5578	11.3611	11.4939	10.8432	11.4184	11.1192	11.7098
ARGFXP2	6.53869	6.98822	7.03269	7.1412	7.13598	5.84836	7.22025	7.07836	7.0223	7.13339	7.15353	7.10806	6.98362	7.39317	7.1872	7.20007	7.15992	7.17103	7.05031	6.88263	6.56099	7.25929	7.22807	7.0317	6.8859	7.11985	7.07214	7.15574	7.13308	7.21629
ARGLU1	11.7113	11.613	11.5958	11.8495	11.8763	11.2393	12.1817	11.8429	11.4752	11.3986	11.6736	11.4449	11.7337	11.7096	11.6946	11.6108	11.1245	11.4878	11.6048	11.4534	10.9744	11.6343	11.286	11.4934	11.6641	11.5121	11.6745	11.5703	11.4893	11.4327
ARHGAP1	12.6508	12.913	12.6777	12.8345	13.0445	12.4773	12.8674	12.5397	12.7921	12.6932	12.7971	12.5041	12.6684	12.8937	13.0353	12.9536	12.1485	12.2996	13.0927	12.7006	11.7588	12.3438	12.1475	12.2458	12.337	12.3522	12.2896	12.4686	12.4773	12.2225
ARHGAP10	10.6524	10.8946	10.97	10.8576	10.6157	10.8055	10.3069	10.6037	10.5249	10.4742	10.7019	11.0313	11.0154	10.7551	10.3289	10.7924	11.1936	11.0505	10.3809	10.9269	11.1917	11.1266	11.0499	11.2935	10.9584	10.972	10.9984	11.0541	10.9548	10.941
ARHGAP11A	6.41883	7.01209	6.4944	6.48449	7.00421	7.02368	7.67506	7.6193	7.52353	7.22618	6.73802	5.47205	6.95883	6.7344	7.64903	6.93963	6.80805	6.73212	7.26873	6.29519	7.14489	6.71031	6.74492	6.16735	6.13956	6.8859	6.5011	6.13288	7.04745	6.43754
ARHGAP12	11.4866	11.1555	11.4955	11.3762	11.2958	11.5364	11.4879	11.3733	11.5046	11.4362	11.5535	11.5069	11.4886	11.3181	11.2047	11.5978	11.6288	11.6547	11.1761	11.3918	12.017	11.6243	11.903	11.5205	11.6101	11.617	11.5461	11.4458	11.5407	11.5437
ARHGAP15	9.23201	8.86863	8.66314	9.58619	9.76261	9.29286	9.85524	10.0956	9.95614	8.71077	9.3496	8.68711	10.0057	9.63295	10.012	9.89275	7.76182	10.3959	8.52114	8.51823	9.01867	7.95568	7.70169	7.89197	7.35708	7.48117	7.20161	7.6883	7.70471	8.00887
ARHGAP17	11.4523	11.4846	11.4023	11.5891	11.6318	11.015	11.608	11.5506	11.4283	11.3517	11.589	11.3521	11.3644	11.68	11.6953	11.7141	10.9768	11.3275	11.5254	11.3313	11.0081	11.4306	11.3709	11.3431	11.3868	11.2362	11.3781	11.4074	11.3325	11.4895
ARHGAP18	11.4553	11.3424	11.3827	11.0541	11.0495	11.0721	11.3702	11.0382	11.3448	11.4506	11.2883	11.3636	11.1252	11.4413	11.1425	11.3002	11.2221	11.0152	11.136	11.1675	11.0145	11.5764	11.684	11.546	11.6832	11.6212	11.577	11.4164	11.3742	11.5959
ARHGAP19	8.88141	8.69177	8.70049	9.00573	8.9209	8.85489	8.958	9.23268	9.03051	8.99559	8.68798	8.81626	8.93432	8.86767	8.93245	8.88213	9.11398	9.47834	8.53513	8.62411	9.48529	9.47248	9.16368	9.13855	9.21422	9.12911	8.80703	9.12193	8.99981	9.07502
ARHGAP20	7.82349	7.67614	7.20405	8.13148	8.40764	7.39237	7.37551	8.2376	7.73032	6.96329	7.45764	7.56913	7.50742	7.95526	8.03659	8.02547	6.78846	8.12023	6.79596	7.58129	8.27116	6.46984	6.4935	7.21601	6.22067	6.79813	6.84426	6.49583	6.92174	6.75452
ARHGAP21	12.3354	12.1347	12.0045	12.0844	12.2405	12.2867	12.2083	12.32	12.2665	12.2767	12.1584	12.1524	12.264	12.0737	12.1012	12.494	11.9713	12.2546	12.1874	12.0943	12.2921	12.0545	12.2668	12.015	12.1278	12.045	12.1177	11.9843	11.9444	12.1101
ARHGAP22	8.61137	8.63917	7.87562	8.3343	9.29543	8.61589	9.14057	9.43181	8.69968	8.4238	8.25287	7.73695	8.76885	8.83813	9.2935	8.64595	7.14409	8.90995	8.70555	8.19743	8.10627	6.91926	6.60827	6.55087	6.84655	7.0612	6.63899	7.45764	7.35885	7.23703
ARHGAP23	11.8317	12.0748	11.7882	11.9749	12.3764	11.1774	12.0272	11.6591	11.6547	12.165	11.594	11.7497	11.2879	12.1284	11.8671	11.9796	11.0557	11.3629	12.2878	11.4857	10.7673	11.8567	11.2298	11.911	11.7759	11.3957	11.6792	11.7546	11.7782	12.1083
ARHGAP24	12.9391	12.7596	12.8448	12.7746	12.5868	13.0854	12.6709	12.7152	12.9954	12.9482	12.9078	12.945	12.9577	12.584	12.7742	12.7188	13.266	12.8349	12.7184	13.1188	12.8763	13.0481	13.3843	13.1749	13.2602	13.2846	13.2643	12.8006	12.8385	12.8147
ARHGAP25	10.1368	10.0337	9.55059	10.4283	10.8092	10.0138	11.3342	11.0591	10.5109	9.72049	10.084	9.65969	10.9971	10.7842	10.8851	10.79	9.0083	11.0755	9.82185	10.0503	9.83695	9.39575	8.97915	9.23491	8.87801	9.00078	8.9422	9.06724	9.09703	9.38042
ARHGAP26	12.007	11.9106	11.5063	11.8694	12.3836	12.0191	12.745	12.3127	12.0198	11.407	12.0994	11.5329	12.1973	11.9561	12.2724	12.5661	11.3864	11.8892	12.0474	11.9895	11.9857	11.5348	11.4978	11.2793	11.4741	11.2297	11.5224	11.4451	11.2495	11.5156
ARHGAP26-AS1	4.85774	6.32059	4.70279	5.46241	6.97604	5.78938	6.73654	6.70825	5.41845	5.23907	6.60282	5.76391	6.35385	6.05386	6.34809	6.70973	5.49529	5.32814	6.2526	5.8761	5.72836	5.45154	6.31769	6.90853	7.72411	6.66336	7.02905	6.97142	6.13724	7.77425
ARHGAP27	6.65791	7.31305	6.8241	7.15341	6.82968	6.3906	7.00571	7.20591	6.74742	6.48078	6.56099	6.54226	5.88505	7.20436	6.93624	6.22333	5.74192	5.58135	6.9945	6.41883	5.56135	6.63899	5.79941	6.48554	6.61904	6.31246	6.63899	6.74119	7.13308	6.69678
ARHGAP27P1	9.85721	10.2726	10.1083	10.2613	10.4416	9.13321	10.7095	10.025	9.63743	9.9456	10.0401	10.161	9.7392	10.2471	10.1294	9.96213	9.37556	9.37828	10.1848	10.1032	8.94307	10.1205	9.67581	10.1452	10.1029	9.8998	10.177	9.84603	9.77042	9.91859
ARHGAP27P1-BPTFP1-KPNA2P3	10.2697	10.1106	10.1064	10.2502	10.2196	9.5085	10.5175	10.139	10.061	9.83957	10.3595	10.3313	10.0562	10.3941	10.2583	10.3228	9.59206	9.66137	10.2852	10.1704	9.36305	10.256	9.94081	10.1359	10.1208	9.86255	10.1576	9.5975	9.68309	9.9293
ARHGAP28	9.3906	9.3497	9.8911	9.70492	9.04847	9.31356	7.67506	8.91112	9.45157	10.1225	9.19269	10.1414	8.86767	9.43278	8.39746	9.13105	10.1145	9.97858	8.6469	9.11704	9.86833	10.9441	10.5126	10.5121	10.5313	10.3694	10.5374	10.1464	10.486	10.6317
ARHGAP29	13.038	12.3946	12.2878	12.4545	12.6916	12.7285	13.0323	12.721	12.985	13.1807	12.9663	12.4294	12.6859	12.2704	13.149	13.0304	12.2668	12.5444	13.7865	12.2568	12.6642	12.436	12.2693	12.1455	12.4988	12.3906	12.4073	12.6136	12.213	12.7918
ARHGAP30	11.1435	10.9899	10.2328	11.3463	11.9512	10.837	12.3663	12.1739	11.3139	10.3541	10.8855	10.3004	11.8027	11.6573	11.9381	11.7187	9.23186	11.6464	10.8077	10.7578	10.038	9.57114	8.85582	9.42928	9.05016	9.35311	9.40354	9.7714	9.35294	9.74085
ARHGAP31	12.2804	12.5391	12.2097	12.195	12.5181	12.1168	12.5658	12.541	12.4815	12.2788	12.25	12.0761	12.2288	12.5393	12.4618	12.4761	11.9741	12.1999	12.218	12.2349	12.2707	12.1664	12.0414	11.9245	11.821	11.9776	11.9251	11.7997	12.0382	11.8294
ARHGAP31-AS1	6.47806	7.02262	6.4944	6.51005	6.72008	6.66644	6.90853	6.68108	6.34693	6.85856	6.66524	6.47191	6.58129	6.89314	6.51101	6.63071	6.78846	6.73212	6.766	6.56341	6.87983	6.74773	6.68568	6.79317	6.74614	6.91999	6.53043	6.90122	6.89512	7.45875
ARHGAP32	12.0739	11.9181	12.1578	11.9489	12.1033	11.8884	11.774	12.0428	12.113	12.0577	12.1907	12.1808	11.982	11.9223	11.8546	12.0899	12.2629	12.0983	11.7438	12.1399	12.3189	12.0675	12.4301	12.229	12.1827	12.214	12.1842	12.146	12.1543	12.2023
ARHGAP33	9.52159	9.9293	9.70539	10.0406	9.96034	7.81878	10.2897	8.49571	9.12237	9.41897	9.75127	9.70084	8.43201	9.65045	9.77672	9.42081	8.25096	8.1919	9.1972	9.4536	7.86445	9.98193	9.23316	9.6222	9.94633	10.0308	10.0733	9.71529	10.155	9.71296
ARHGAP35	13.8546	13.7398	13.6834	13.8248	13.7949	13.4994	13.8471	13.8357	13.7498	13.8338	13.7699	13.805	13.527	13.5965	13.6834	13.8091	13.7684	13.7843	13.4958	13.7907	13.6379	13.6379	13.8521	13.6798	13.6852	13.7205	13.7165	13.693	13.7684	13.6141
ARHGAP39	10.0071	10.061	10.1554	9.99086	10.2085	9.1162	10.244	9.53865	9.53165	10.1928	10.1511	10.2214	9.40067	9.93752	9.90716	9.44077	9.48029	9.04736	10.4802	10.256	8.78052	10.1188	9.95104	10.0153	10.3735	10.3017	10.2487	10.311	10.4704	10.1307
ARHGAP4	11.5304	11.3424	10.9397	11.7453	12.1422	10.8261	12.5418	12.1874	11.7366	11.1567	11.3877	10.9599	11.5989	11.9126	12.1679	11.671	10.1557	11.6445	11.3745	11.2231	10.1566	10.6373	10.1155	10.5276	10.456	10.336	10.6035	10.7774	10.6683	10.7977
ARHGAP40	9.57099	9.50663	7.63027	7.77101	9.5929	7.27692	9.12193	8.14612	7.82559	7.84755	9.39559	7.46177	8.93129	8.14313	9.54352	8.94119	6.49416	7.67993	8.83259	8.97222	7.31953	5.74772	5.53365	5.32096	6.8859	5.80159	7.22504	7.14331	6.60319	7.0455
ARHGAP42	10.1908	10.1306	10.5818	10.2336	10.0136	9.93016	9.7971	9.88291	9.92949	10.0548	10.3376	10.4259	10.1584	10.2592	9.92417	10.2706	10.5492	10.2374	9.7274	10.2264	10.3413	10.4718	10.7242	10.9084	10.6018	10.5361	10.4994	10.5625	10.6406	10.7059
ARHGAP44	9.67074	9.85703	9.69973	10.0546	10.1344	9.33211	10.3592	9.62008	9.5961	9.85205	9.85084	9.99008	9.70084	9.9894	10.0951	9.8847	9.2466	9.5404	10.0116	9.9894	8.9971	10.0892	9.81277	9.89933	9.85988	9.82645	9.72	9.80436	9.67275	9.28582
ARHGAP45	12.2214	11.7927	11.349	12.3483	12.7428	11.0636	13.1501	12.7755	11.7851	11.3475	11.8088	11.5948	12.3232	12.6013	12.6057	12.1668	10.1998	12.3232	11.5311	11.8315	10.6506	10.8853	9.84296	10.9003	10.5149	10.4576	10.5136	10.9187	10.9778	10.7008
ARHGAP5	12.627	12.2164	12.8128	12.7032	12.1868	12.2431	12.2755	12.335	12.7669	12.7428	12.6489	12.6609	12.4563	12.3581	12.347	12.7377	12.6219	12.7256	12.3473	12.2259	12.5151	13.1064	13.0349	12.9005	12.8609	12.892	12.9239	12.7338	12.8247	13.1094
ARHGAP5-AS1	6.69536	7.20854	7.0137	6.9881	7.34612	8.00332	6.05434	7.38198	7.13651	6.75961	6.90599	7.06454	6.97129	6.86964	6.86944	7.28301	7.83439	7.63038	6.78284	7.04647	7.88124	7.28277	6.91541	7.2964	7.40303	7.41947	7.40885	7.12164	7.08886	7.60796
ARHGAP6	11.3266	11.2005	11.0345	11.1671	11.0335	10.9973	11.1831	10.9622	10.9166	11.6209	11.2372	11.4419	10.7495	10.8938	11.4524	10.7304	11.3128	10.3027	11.72	11.3634	10.5383	11.5086	11.3404	11.2577	11.5683	11.4507	11.9397	11.5464	11.4384	11.0403
ARHGAP9	10.03	10.0855	9.10973	10.3988	11.0975	9.85084	12.0458	11.222	10.567	9.45989	9.95498	9.53518	11.2124	10.9389	11.1233	10.6985	8.23638	10.736	9.86354	9.86076	9.40657	8.58124	7.80467	8.70466	8.02736	8.29566	7.89714	8.7596	8.21541	8.91065
ARHGDIA	13.0833	13.4059	13.0755	13.2359	13.3427	13.2306	13.0512	13.3936	13.1729	13.4659	13.1031	12.9416	12.9776	13.0894	13.2577	13.0201	12.8681	13.0774	13.4737	13.1158	12.7312	12.9046	12.575	12.8793	12.9569	12.8547	13.0652	13.3056	13.2152	13.234
ARHGDIB	11.9713	11.9659	11.5289	12.1144	12.4915	12.6563	12.7045	13.0439	12.5739	11.8243	11.8976	11.4503	12.8681	12.3489	12.6905	12.7261	11.2454	13.186	11.8203	11.5506	12.4669	11.115	10.7052	11.1845	10.95	10.98	10.8776	10.8813	10.9465	11.0079
ARHGEF1	12.3309	12.3489	11.9977	12.6693	12.935	11.4856	13.3108	12.4621	12.0777	12.1216	12.3921	12.1748	12.2534	12.8324	12.8569	12.5645	11.015	12.0474	12.5734	12.2646	11.1033	11.9664	11.6061	11.8298	11.7769	11.8221	11.8538	12.0048	11.957	11.8146
ARHGEF10	11.3152	11.1935	11.0315	10.9854	11.4379	10.9462	11.3302	10.9984	11.2572	11.0428	11.2807	11.0514	11.0735	11.0259	11.2944	11.3779	10.5116	11.1578	11.4771	10.8459	10.7603	10.9027	10.5939	10.5907	10.6913	10.4666	10.8859	10.6787	10.9248	10.7507
ARHGEF10L	13.3256	13.41	13.5651	13.4488	13.2699	12.8423	13.5059	12.875	12.9235	13.4275	13.454	13.5221	12.8251	13.3256	13.2201	13.0388	13.1947	12.7617	13.4563	13.6962	12.5625	13.5927	13.3734	13.5436	13.7126	13.5429	13.7331	13.2846	13.742	13.0691
ARHGEF11	12.5231	12.5799	12.432	12.5068	12.7739	11.9979	12.8691	12.5664	12.5027	12.6528	12.4832	12.4476	12.2369	12.512	12.668	12.5943	12.0685	12.3067	12.6481	12.5418	12.2221	12.3189	12.3741	12.3211	12.3466	12.271	12.3846	12.5184	12.2758	12.2108
ARHGEF12	14.9337	14.8918	14.7629	14.7496	14.8205	14.9076	14.8515	14.8435	14.9696	15.0795	14.9157	14.7563	14.9606	14.7699	14.7221	14.9794	14.9076	15.0446	14.8435	14.8017	14.9892	14.8017	14.9696	14.6749	14.8918	14.7629	14.7629	14.8679	14.7496	14.7364
ARHGEF15	10.5761	11.1375	10.9397	11.0987	10.7429	10.0612	10.8005	10.221	10.5249	10.9325	11.0405	10.9108	9.96282	11.0721	10.3942	10.8273	10.5397	10.0013	10.9728	10.6601	9.77211	11.1978	10.6379	10.9121	10.7324	10.776	10.9412	10.6856	10.9878	10.6451
ARHGEF16	11.1111	11.1437	11.0135	10.9974	10.9054	10.5113	11.2471	10.5038	10.5846	10.9516	11.0161	11.4254	10.1815	10.7897	10.9379	10.6009	11.0732	10.2781	11.1575	11.265	10.1193	11.1475	11.1441	11.0479	11.2582	11.3016	11.3719	11.4196	11.3538	11.1109
ARHGEF17	13.6834	13.693	13.9567	13.9211	13.9371	12.7017	13.963	13.524	13.2965	13.7747	13.6516	13.9028	12.9619	13.9702	13.7498	13.7379	12.8771	13.235	13.5288	13.6704	12.8553	13.876	13.3378	13.8693	13.431	13.4315	13.6339	13.7641	13.6278	13.5594
ARHGEF18	12.2656	12.1455	12.0426	12.2554	12.4566	11.4169	12.5966	12.3029	12.0077	12.2402	12.3258	12.2558	11.9004	12.3281	12.2753	12.0978	11.7306	11.8347	12.2235	12.2327	11.0129	12.1205	11.8427	11.8921	12.0096	12.1059	12.1184	12.104	12.0321	11.8447
ARHGEF19	8.23266	9.0877	8.1741	8.54303	9.02529	8.44673	9.44332	8.75771	8.6215	8.87748	8.77534	8.66862	8.48579	8.73489	9.00351	8.5404	8.12671	8.70784	8.73103	8.27509	7.93607	8.17986	8.42222	8.43201	7.74263	8.00467	7.77664	7.62256	8.29165	7.85415
ARHGEF2	12.2182	12.2345	11.8669	12.3062	12.7397	11.8879	13.0765	12.6663	12.2448	12.0937	12.3859	11.8341	12.3573	12.548	12.6889	12.6101	11.2275	12.3232	12.3601	12.1425	11.6269	11.7056	11.16	11.4708	11.2717	11.1483	11.3469	11.6537	11.4935	11.575
ARHGEF25	9.84697	10.0386	10.1474	10.3655	10.3153	9.58782	10.3404	10.1586	9.95413	9.43749	10.021	9.89169	9.65318	10.3422	10.2961	10.3614	9.21863	10.1871	9.52311	10.0843	9.68309	9.5362	8.57679	9.73435	8.93539	9.14532	9.00683	9.15403	9.49942	9.26337
ARHGEF26	8.95501	8.54776	9.12823	9.1014	8.56798	8.76074	8.15602	8.50486	8.45472	9.24491	8.52837	9.11039	8.68351	8.96974	8.38563	8.72832	8.97704	9.2659	8.73103	8.84872	9.06022	9.75823	9.43773	9.69404	9.73998	9.42838	9.17462	9.9366	9.00958	9.60907
ARHGEF28	13.2404	12.6676	13.1111	13.0349	12.7646	12.8727	12.6146	12.7075	12.9198	13.362	13.1909	13.1996	12.8251	12.6798	12.8104	12.7968	13.2048	12.685	12.8904	12.9342	13.177	13.1397	13.4737	13.4408	13.5834	13.3021	13.3936	12.9101	13.0543	13.4582
ARHGEF3	11.7779	11.5221	11.6054	11.7409	11.4842	11.6976	11.4505	11.4424	11.7497	11.9298	11.7692	11.7192	11.6693	11.7339	11.4605	11.6493	11.8852	11.9255	11.5802	11.5683	11.4421	12.0456	11.9386	12.0083	12.1865	11.88	11.7508	11.9354	11.9756	11.8211
ARHGEF33	7.46338	7.51267	7.27872	7.45439	7.52593	7.65845	7.6388	7.29226	7.43575	7.61101	7.66311	7.75797	7.89401	7.63739	7.60043	7.51081	8.32706	7.59944	7.87102	7.59358	8.19099	7.53532	8.19647	7.50924	6.94998	7.31305	7.56716	7.28648	7.37268	7.33425
ARHGEF34P	9.43652	9.24809	9.33211	8.85771	9.7954	8.97872	10.163	8.92357	9.38071	9.81992	9.57786	9.74131	9.85565	9.16119	9.09094	9.64045	9.64508	9.29843	9.73107	9.84296	9.41454	9.64139	10.158	9.10567	9.59831	9.74935	9.8347	10.1311	9.92233	9.57361
ARHGEF35	7.64153	8.21473	7.76707	6.63984	7.99009	7.60463	7.29789	7.84621	7.89631	8.23585	7.65364	7.93999	7.71751	7.01424	7.76626	7.72329	7.95421	7.79048	8.55962	7.68114	7.71639	7.88942	8.66036	7.0701	8.31408	7.9195	7.88548	8.7217	7.90293	7.85415
ARHGEF37	10.5156	10.6034	10.4624	10.3722	10.2506	10.5717	10.456	10.0783	10.5375	10.9387	10.5799	10.4929	10.4202	10.239	10.1523	10.6602	10.647	10.5216	10.3578	10.5205	10.6417	10.6431	10.786	10.6724	10.7145	10.954	10.3133	10.6349	10.4028	10.3541
ARHGEF38	10.0157	9.41808	9.00168	9.0694	9.52703	9.68968	10.5114	9.37063	9.6947	9.72357	9.96584	8.92707	9.59477	8.73051	10.4516	10.1753	8.98256	9.09094	10.8527	9.68325	8.0174	9.06843	9.23717	8.83839	9.22842	9.13121	9.44361	9.37992	9.04758	9.3634
ARHGEF38-IT1	4.85774	4.78173	4.83863	3.87915	5.36803	5.46506	6.9248	5.41008	5.82734	5.9195	6.39155	5.55668	5.94728	4.80238	6.05517	6.19134	5.61918	5.88591	7.00895	4.97359	5.56135	5.2262	5.57622	5.32096	5.20982	5.73481	5.8402	5.16697	4.87722	4.25689
ARHGEF39	7.32572	7.39679	6.98176	6.79866	7.61269	7.64832	6.80763	7.49256	7.25783	6.96329	6.99777	7.36553	7.205	7.14429	7.53422	7.12034	6.82705	7.20206	7.25769	7.16858	6.81072	6.97477	6.88263	6.64737	7.22708	7.22025	6.63899	7.38162	6.86804	7.48793
ARHGEF4	7.32572	7.73975	7.68743	7.6892	7.189	7.58893	7.06087	7.34122	6.99933	7.18653	7.58904	8.042	7.08247	7.64619	6.79635	6.93963	8.37131	7.2796	6.61934	7.67119	6.77137	7.46999	8.54244	8.33957	7.74263	8.21294	7.96772	7.63701	7.93976	7.81208
ARHGEF40	12.4838	12.5693	12.1105	12.4219	12.7925	11.9299	12.9391	12.5856	12.2971	12.4649	12.5142	12.4038	12.2785	12.2621	12.7861	12.4165	11.8074	11.8556	12.8393	12.541	11.5876	11.9427	11.6857	11.7044	11.8289	11.783	12.0819	11.9811	11.948	11.7601
ARHGEF5	10.6768	10.8988	10.9389	10.1246	11.4708	10.1166	11.2718	10.3326	10.2309	10.9548	10.9928	11.0457	11.1849	9.83149	10.8825	11.3352	11.1381	10.8451	11.2492	11.0844	10.6635	11.0365	11.3725	10.6975	11.1539	11.262	11.3834	11.1113	11.4964	10.582
ARHGEF6	11.1384	10.9545	11.0265	11.3955	11.5874	10.6726	11.5248	11.6485	11.3691	10.7293	10.9784	10.9902	11.4368	11.5386	11.5002	11.7927	10.5559	11.5872	10.5328	10.8473	10.7174	10.8814	10.53	10.9945	10.5031	10.5266	10.6423	10.438	10.7624	10.5939
ARHGEF7	12.5118	12.3851	12.3559	12.389	12.3801	12.0939	12.7023	12.391	12.3192	12.334	12.4569	12.3548	12.4032	12.6159	12.4038	12.5565	12.3216	12.3648	12.261	12.4244	12.3247	12.5155	12.7487	12.5213	12.5859	12.447	12.5202	12.3331	12.3688	12.427
ARHGEF9	11.1976	11.1037	11.2169	11.0799	11.2236	11.2165	10.5647	11.1037	11.2011	11.0797	11.1277	11.3646	11.1147	11.1389	11.0472	11.1573	11.4293	11.0921	10.5965	11.2766	11.0502	11.3978	11.2333	11.3888	11.1281	11.3664	11.3497	11.1908	11.1394	11.1498
ARID1A	13.4659	13.4422	13.197	13.5388	13.6985	12.6582	14.013	13.5748	13.3097	13.3244	13.5594	13.3734	13.2131	13.5748	13.7577	13.5874	12.6961	13.1354	13.586	13.4161	12.6693	13.266	13.0717	13.2589	13.2621	13.2078	13.3172	13.3563	13.3492	13.1873
ARID1B	13.2909	13.176	13.01	13.2504	13.4515	12.8192	13.7165	13.3517	13.1151	13.0846	13.2577	13.1115	13.2417	13.2869	13.3521	13.3538	12.8411	13.214	13.2791	13.176	12.8491	13.1031	13.002	13.089	13.1404	13.0238	13.1473	12.9954	13.0224	12.8994
ARID2	12.005	11.6837	11.8151	11.8544	11.8708	11.5173	12.0039	11.8921	11.9863	11.8475	12.0971	11.8597	11.8763	11.9274	12.1002	12.1501	11.7196	11.8927	11.9392	11.689	11.5687	11.9438	12.0466	11.9046	11.9249	11.8402	11.8891	11.8433	11.7804	11.833
ARID3A	9.93891	10.179	10.0318	10.1529	10.0709	9.29933	10.3195	9.98071	9.61813	10.0197	10.1119	10.2882	9.39743	10.1432	10.1627	9.69973	9.9345	9.19682	10.2518	10.2969	9.53145	10.3488	10.057	10.4589	10.3132	10.2154	10.0412	10.3758	10.3668	10.3841
ARID3B	9.61347	9.57013	9.5758	9.65339	9.8234	9.22165	10.1882	9.81661	9.72141	9.52424	9.5975	9.48649	9.72689	9.85408	9.72847	9.8643	9.90696	9.31587	9.42249	9.9934	9.46173	9.81703	9.63306	9.64344	9.60576	9.60488	9.22514	9.88726	9.77883	9.88409
ARID4A	10.4322	10.3701	10.6376	10.6609	10.1276	9.63398	10.4048	10.2941	10.3491	10.2119	10.5586	10.4117	10.5829	10.5549	10.5006	10.5563	10.1145	10.2857	10.1479	10.2205	9.8392	10.9911	11.2418	11.3027	11.3748	10.9096	10.9961	10.5244	10.7436	12.0204
ARID4B	11.3836	11.1853	11.2955	11.4851	11.038	10.5635	11.3806	11.0091	11.1589	11.1589	11.2234	11.1486	11.4181	11.1974	11.3973	11.2475	10.729	11.0886	11.2794	10.999	10.5846	11.5205	11.4536	11.3361	11.5156	11.2958	11.419	11.1109	11.1735	11.3976
ARID5A	9.71529	9.85107	9.52159	10.094	10.2569	9.86008	10.5175	10.4687	9.70547	9.77242	9.82439	9.75732	10.3103	10.4785	10.6227	10.2048	9.40879	10.2217	10.5743	10.0028	9.76986	9.08835	8.83664	9.67235	10.0883	9.50029	9.60824	10.0902	9.46173	10.667
ARID5B	13.3021	12.7991	12.7203	13.3751	13.1031	13.1198	12.9063	13.4275	13.0586	13.0269	13.2472	12.8698	13.4217	12.9151	13.487	13.2306	12.9595	13.2306	13.7539	13.068	12.9023	12.7739	13.1935	13.4059	13.5848	13.2733	13.1167	12.8036	12.8616	13.646
ARIH1	12.0677	11.8313	11.9028	12.0538	11.8921	11.772	12.0471	11.9503	11.9474	11.9495	12.1108	11.9012	12.0434	11.9859	12.0787	12.1071	11.7711	11.9674	12.052	11.8831	11.7927	12.0043	12.0707	12.0765	12.1251	12.0363	12.0447	12.1614	11.9532	12.3861
ARIH2	12.0724	11.9739	11.8009	11.884	12.0235	11.9958	12.2619	12.1452	12.013	11.7235	11.9409	11.7898	12.1754	11.9581	11.9951	12.0694	11.9012	12.1038	11.9932	12.0611	11.8987	11.8206	12.0054	11.8373	11.8046	11.7685	11.7914	11.7529	11.6849	11.7314
ARIH2OS	6.30462	6.33988	6.70328	6.95982	6.69697	7.30047	6.30665	6.96471	6.60356	6.78592	5.91066	6.76699	6.22359	6.46882	6.41004	6.72866	7.24253	7.18186	6.52127	6.66105	6.87983	6.86211	6.83693	6.7141	7.01687	6.8859	6.61183	6.88213	7.20206	6.55223
ARL1	11.2984	11.2681	11.617	11.4158	11.0684	11.6732	11.0302	11.3202	11.4784	11.5071	11.3988	11.4572	11.4432	11.2607	11.3379	11.3779	11.7617	11.744	11.2955	11.3452	11.7297	11.632	11.712	11.5394	11.6194	11.7148	11.6581	11.3334	11.5563	11.6379
ARL10	9.55275	9.73058	9.25429	9.3906	9.97047	9.55623	10.161	9.84216	9.47162	9.45989	9.71154	9.5758	9.62008	9.67459	9.59477	9.70238	9.49121	9.39267	9.88362	9.78071	9.63468	9.00709	9.69642	9.27193	9.47138	9.19842	9.01125	9.38286	9.20238	9.03289
ARL11	7.31037	6.85097	6.24415	7.07186	7.67119	7.31681	7.97706	8.30169	7.58498	6.28313	6.14264	6.40737	8.09744	7.51574	7.82794	7.4249	6.21337	7.6899	7.02175	5.8761	7.5592	5.68927	5.02712	5.84043	4.84413	5.45981	5.4061	5.41672	4.76395	5.56656
ARL13B	8.79865	8.85695	8.49385	8.86579	8.58503	8.50878	8.51101	8.59416	8.63967	8.83488	8.74253	8.95114	8.50512	8.4253	8.60338	8.68777	8.70302	8.74597	8.97418	8.62984	8.76172	9.15678	9.12563	8.93403	9.07762	9.10267	8.97222	8.90559	8.80448	9.29051
ARL14EP	9.12834	9.12516	9.4429	9.15522	9.01415	9.34405	8.76414	8.982	9.24491	9.3502	9.44044	8.99631	9.31661	8.90884	9.13509	9.35916	9.5677	9.67955	9.29429	9.1203	9.36601	9.49356	9.3379	9.2397	9.1738	9.35623	9.34789	9.09334	9.20238	9.41045
ARL15	9.34221	9.32583	9.76142	9.35338	8.99327	9.28333	9.05912	9.21492	9.2921	9.8894	9.62534	9.70988	8.95295	9.34748	9.08778	9.31301	9.49936	9.2525	9.06337	9.2918	9.52401	10.045	10.0513	10.119	10.2463	10.0838	9.89948	9.9577	9.95347	10.1685
ARL16	10.4379	10.6193	10.6415	10.4266	10.4984	11.097	10.4478	10.8375	10.8641	10.6247	10.4995	10.6642	10.6914	10.421	10.4508	10.3944	11.1164	10.838	10.5138	10.6818	11.6096	10.5415	10.4725	10.5374	10.422	10.7163	10.41	10.1929	10.3997	10.3256
ARL17A	8.43171	8.8	6.11284	8.77778	8.97109	7.77406	8.26986	8.39122	7.45182	7.84494	8.15097	6.07597	7.99127	7.96576	9.24771	6.30462	8.93705	6.06462	8.49622	8.46214	7.5373	8.51169	7.964	8.19806	7.21047	7.89682	6.66298	7.95647	8.94931	8.63521
ARL2	10.2469	10.3012	10.1871	10.1743	10.4888	11.1813	9.88138	10.7259	10.3652	10.4027	9.95148	10.2076	10.3261	10.0825	10.0679	9.97599	11.0887	10.7992	10.2287	10.5244	11.4745	10.1088	10.1848	10.3795	10.2746	10.4377	10.4572	10.5604	10.5247	10.3117
ARL2BP	10.7756	10.7476	10.9032	10.747	10.7474	11.1791	10.507	10.7981	11.0201	11.0247	10.9502	10.7803	10.789	10.7158	10.7581	10.9155	11.1422	11.0855	10.7268	10.8878	11.1639	10.8776	11.0098	10.9852	10.732	10.9057	10.8376	10.9211	10.8319	11.0886
ARL3	10.1969	10.4097	10.3266	10.0868	10.1327	10.7765	10.2422	10.515	10.4357	10.3235	10.2967	10.4424	10.4653	10.0157	10.2233	10.2647	11.0779	10.7038	10.2262	10.2969	11.1446	10.5	10.4103	10.3239	10.4332	10.3711	10.401	10.057	10.1741	10.3646
ARL4A	8.0671	7.96871	7.87562	8.02203	7.88303	8.5731	8.36717	8.33385	8.41941	7.86241	8.2963	7.93485	8.45332	7.8837	8.58453	8.24432	8.01582	8.78895	8.28588	8.05214	8.31607	7.54511	7.84561	7.48199	7.39237	7.76565	7.33502	7.50428	7.42982	8.49478
ARL4C	10.8778	10.9137	9.51888	10.5675	11.7088	11.1276	11.4695	11.7985	11.3038	10.6433	10.7318	9.69051	11.4134	10.8613	11.6375	11.3754	8.53429	11.2349	11.2378	10.3593	10.046	8.31431	8.06931	8.99814	9.4295	8.52182	8.65213	10.458	9.04409	10.522
ARL4D	9.21649	9.56418	9.31696	8.92752	9.299	10.2577	9.23301	9.74433	9.80334	9.45652	9.29241	10.0917	9.69286	9.57318	8.83839	9.65251	10.2466	9.77459	9.60887	9.90264	10.242	10.1033	10.6782	9.95954	10.271	9.89838	9.36017	10.5963	10.4294	9.42383
ARL5A	9.70893	9.66501	10.3571	9.8054	9.53445	9.69537	9.6065	9.85703	9.83196	9.92356	9.6026	9.80046	9.76044	9.82922	9.72847	9.66184	10.2509	10.09	9.6485	9.55882	10.5554	10.3677	10.3488	10.475	10.1971	10.1912	10.1404	10.0902	10.3621	10.5196
ARL5B	8.90545	8.83259	8.8217	8.81607	8.7638	8.76521	8.64824	8.92357	9.01415	9.11758	8.94795	9.11039	9.1004	8.87554	8.85582	9.02958	9.08835	9.01397	9.08282	8.70696	9.21375	9.08459	9.23316	9.29005	9.53722	9.30424	9.15678	9.41765	9.03973	10.0626
ARL6	8.19584	8.26795	8.35567	8.12278	8.11654	8.04398	8.0597	7.88062	8.33901	8.81262	8.16504	8.37171	8.12089	8.23526	7.92279	8.24432	8.58269	8.05923	8.29727	8.01909	8.54188	8.97092	8.95097	8.63112	8.69893	8.96241	8.85619	8.4179	8.66605	8.72412
ARL6IP1	11.8498	11.7886	12.1214	11.8968	11.3916	11.9545	11.759	11.5474	12.1409	11.8802	12.0334	12.0509	11.9215	11.8968	11.9234	11.909	12.2855	11.9572	11.8051	11.865	12.0091	12.1954	12.351	12.0787	12.0445	12.2396	12.0985	12.0545	12.068	12.1315
ARL6IP4	12.142	12.197	12.1748	12.0959	12.2738	13.0464	12.1488	12.626	12.3186	12.0726	11.8639	12.02	12.399	11.9954	11.9169	11.7083	12.8086	12.8856	11.8683	12.31	13.1935	12.0685	12.0214	12.1614	12.1071	12.0779	12.2051	12.1958	12.1859	11.8985
ARL6IP5	11.2258	11.0538	11.0367	10.7381	11.0462	12.0919	11.0229	11.7617	11.3409	10.9502	11.248	10.746	11.5298	10.9838	11.3566	11.1783	11.2191	11.9119	11.2253	11.0862	11.8417	10.6614	10.5627	10.7791	10.3583	10.9847	11.2409	11.13	10.4273	10.9197
ARL6IP6	8.63999	8.65169	8.48937	8.63865	8.95465	9.05711	9.22753	9.05912	9.0025	8.82937	8.6938	8.7638	8.99352	8.75222	8.76818	8.65117	8.8379	8.63841	8.86332	8.52849	8.84773	8.76818	8.72746	8.77597	8.74759	8.3343	8.61822	8.69968	8.64131	8.75085
ARL8A	10.6561	10.9793	10.8389	10.7893	10.7801	11.1444	10.6652	11.0299	10.9436	11.1495	10.7276	10.8136	10.8784	10.7348	10.7302	10.8012	11.1778	10.9317	10.9129	10.8947	11.0404	10.8176	10.8654	11.0832	11.1377	10.9741	10.8732	11.2545	11.0767	11.3501
ARL8B	10.8761	10.9211	11.1993	10.9866	10.669	10.9803	10.7945	10.6342	11.0241	11.031	10.9553	10.9213	10.9167	10.8679	10.6818	10.9608	11.0751	10.8027	10.8789	10.8894	10.9517	11.3273	11.2113	11.3473	11.2395	11.29	11.2874	11.1542	11.238	11.5247
ARMC1	9.86354	9.75363	10.1502	9.71409	9.55623	9.81808	9.41006	9.59628	9.83196	10.024	9.79444	9.90676	9.82322	9.78306	9.51828	9.77627	10.2369	9.74925	9.63825	9.7426	9.87947	10.0505	10.3608	10.2119	10.0396	10.3484	10.0966	9.93823	10.0692	10.1627
ARMC10	10.1534	10.0839	10.0988	10.0406	9.91425	10.263	9.58547	9.99927	10.1217	10.0627	9.99521	10.0723	9.82922	9.7328	9.78646	9.83873	10.1947	10.052	10.028	9.76279	10.3249	9.98553	10.1731	10.099	10.001	10.2154	9.98278	10.0215	10.0902	10.2033
ARMC2	9.16615	8.93915	8.75526	8.7443	9.23821	9.12812	9.07309	9.24938	9.14005	8.95131	9.33125	9.16253	9.16542	8.98942	8.92039	9.15145	9.0351	9.02603	9.11833	9.21492	9.08603	9.01764	9.19782	9.13121	8.90839	9.07008	9.24299	9.10993	9.01415	8.74612
ARMC2-AS1	5.65738	5.36274	5.69488	5.09392	5.63388	5.84836	5.77891	6.2149	5.96259	5.5819	5.95039	6.36301	5.98222	5.51476	5.89621	5.73197	6.26528	5.32814	6.10986	6.56341	6.45365	5.87065	6.14264	6.51005	5.76536	6.03717	6.3569	5.92298	5.93494	5.56656
ARMC3	5.39328	6.57937	5.05484	6.20381	5.76193	7.27692	6.08703	7.09212	6.64481	6.55748	7.47938	5.79529	7.205	5.69049	6.69075	6.15908	4.95501	6.78592	6.93902	6.29519	5.86461	5.81794	5.40646	5.44135	5.49529	5.91717	5.65949	6.00661	5.36321	4.63347
ARMC4	5.32325	5.25981	4.70279	3.56001	6.3757	5.63849	4.26305	5.69488	5.9274	4.79569	4.35131	3.65157	6.22359	5.19908	4.85281	5.49084	4.24627	6.12297	2.43619	2.96068	5.83435	5.2262	4.80418	5.04993	4.84413	3.84476	4.63957	3.41484	4.4567	5.2156
ARMC4P1	5.81104	6.32059	4.98258	5.50878	4.53669	5.76025	5.41845	5.80562	4.11506	5.06969	5.65738	5.95883	4.65065	6.16595	5.69104	5.51828	5.88964	4.77498	4.97465	5.03751	4.73084	6.78846	6.70973	6.34693	5.76536	5.56592	5.79529	6.36828	5.88266	6.22689
ARMC5	10.35	10.6274	10.5552	10.6356	10.6479	10.2046	10.6663	10.419	10.2834	10.5761	10.4758	10.5767	10.1359	10.5268	10.4465	10.2311	10.3673	10.1849	10.3823	10.5957	10.2183	10.5662	10.2131	10.5438	10.5939	10.6265	10.5029	10.7489	10.7729	10.4651
ARMC6	9.97118	10.2048	10.0301	9.97301	10.0118	10.1562	9.91007	9.88028	9.94156	10.1755	9.88395	9.83409	9.8032	9.89169	9.9027	9.81251	10.1203	9.88066	10.2408	9.91397	9.8542	9.77459	9.89088	9.86809	9.79014	9.84184	9.9041	10.0197	10.1579	9.87903
ARMC7	9.97318	10.1048	9.8054	9.61937	10.2524	10.0442	10.4928	9.79014	9.9192	10.3801	9.90527	9.76955	9.82459	9.86063	10.1927	10.0731	9.62432	9.52909	10.5668	10.0376	9.58263	9.71776	9.35311	9.29914	9.33948	9.32136	9.40354	9.81431	9.66633	9.63119
ARMC8	11.1599	10.8661	11.0326	10.9866	10.8195	10.8967	10.9532	10.885	11.007	11.0875	11.0613	11.0715	11.0104	11.0276	10.9526	11.076	11.0541	11.058	11.0395	10.8285	10.8675	11.1208	11.3358	10.9659	11.0429	11.0666	11.118	11.0401	10.9919	11.0069
ARMC9	10.9748	10.8418	10.5802	10.6628	11.0138	10.8044	11.2447	10.9486	11.006	10.9523	11.0675	10.8511	10.7156	10.6522	11.1995	10.9172	10.5701	10.6696	11.2678	10.8501	10.9993	10.5923	10.4547	10.3239	10.3374	10.4576	10.4762	10.4755	10.4801	10.1307
ARMCX1	8.93166	9.39033	9.2855	9.19114	9.25175	9.64045	9.26526	9.64731	9.66529	9.51795	9.48356	9.20593	9.65747	9.44186	8.95868	9.21715	9.68446	9.31587	9.31842	9.4861	9.4951	9.51598	9.44511	9.52084	9.30612	9.49704	9.56196	9.44462	9.20238	9.47417
ARMCX2	10.2304	10.1844	10.3212	10.3084	10.5193	10.3921	10.7133	10.0847	10.381	10.2734	10.5375	10.3239	10.2616	10.4073	10.2494	10.262	10.4438	10.3231	10.4729	10.3616	9.99726	10.4667	10.4259	10.2277	10.4532	10.384	10.2546	10.5032	10.2204	10.3054
ARMCX3	10.9458	11.0429	11.1515	11.1178	10.7968	11.097	10.7953	10.887	11.0608	11.2001	11.1085	10.9336	11.2367	11.0186	10.9494	11.0009	11.0103	11.0285	11.2552	11.1204	11.0035	11.3691	11.1141	11.3418	11.3364	11.2372	11.2659	11.221	11.1097	11.591
ARMCX4	10.822	10.734	10.8144	10.8386	10.914	10.3453	11.1573	10.8673	10.7354	10.3456	10.9453	10.7138	10.6557	10.8067	10.9476	11.0168	10.3303	10.8466	10.8909	10.7066	10.4975	11.0842	10.656	10.6687	10.7512	10.8458	10.7684	10.1404	10.819	10.522
ARMCX5	8.91654	8.7601	8.71239	8.73978	8.67455	9.08387	8.56305	8.70302	8.87002	8.73549	9.05238	8.8683	8.71533	8.78476	8.90839	8.97092	9.04073	8.94659	8.98256	8.67949	8.96224	8.84799	8.89743	8.86169	8.87267	8.84708	8.84986	8.67509	8.77996	8.52779
ARMCX6	8.54776	8.6469	8.63357	8.52339	8.54911	9.36698	8.63007	8.89142	9.04226	8.71897	8.62087	8.52862	9.17176	8.69994	8.64899	8.59087	9.22421	9.09614	8.90559	8.7473	9.5861	8.57576	8.73779	8.49777	8.68244	8.38079	8.65213	8.34088	8.49622	8.50867
ARMT1	9.48001	9.82881	10.0839	9.67288	9.1031	9.9144	9.05472	9.22651	9.79596	9.80606	9.61579	9.93823	10.0424	9.50765	9.13928	9.46031	10.3683	9.79842	9.32963	9.6359	10.1086	10.3138	10.1717	10.2734	9.94394	10.1171	10.1434	9.85898	10.0187	10.1276
ARNT	12.1488	12.0127	12.1161	12.005	12.3085	11.9151	12.1839	12.3581	12.2185	11.9474	12.1253	12.1584	12.1909	12.2106	12.1518	12.2867	11.9659	12.1121	12.1166	12.035	11.7642	12.0864	11.9002	12.0198	11.8829	11.9352	11.9611	11.97	11.887	11.9114
ARNT2	12.4239	11.963	11.6649	11.7872	12.5192	12.19	12.6524	12.3818	12.2306	12.3694	12.4563	11.9536	12.0707	11.7127	12.2905	12.2267	11.5895	11.9255	12.6521	12.012	11.8211	11.9038	11.7465	11.7759	11.99	11.862	12.2267	11.9023	11.7387	11.6259
ARNTL	9.44246	9.3497	9.17297	10.1856	10.4114	9.72987	10.0799	9.85703	9.66668	10.1108	10.3438	9.16253	9.5825	9.89709	9.82599	10.4746	9.72418	9.63726	9.70054	9.08842	10.5781	9.60999	10.8876	9.99867	10.7226	10.6069	9.82546	10.5502	10.5896	10.2544
ARNTL2	8.4561	8.41314	6.71908	7.58659	8.69968	8.86767	9.0781	8.74268	8.45472	8.04103	7.88355	7.03096	8.43201	7.5369	8.71239	8.3893	6.42565	8.16533	9.44346	7.72887	8.33071	5.81794	6.2995	5.74624	6.38491	5.84066	6.66298	7.12164	6.07709	7.0455
ARPC1A	11.3662	11.4523	11.3006	11.3057	11.5384	11.9734	11.4728	11.7736	11.7811	11.5049	11.3477	11.3747	11.5318	11.2831	11.3051	11.371	11.7912	11.8465	11.3745	11.426	12.123	11.2314	11.3926	11.2593	11.1605	11.2857	11.2594	11.2373	11.248	11.2698
ARPC1B	11.749	11.9298	11.0367	11.5856	12.4513	12.5431	12.4327	12.6468	12.3103	11.8554	11.5882	11.0428	12.1792	11.8657	12.2946	11.7558	10.5701	12.2482	12.4948	11.4323	11.9977	10.4421	10.3456	10.2831	10.5135	10.2722	10.4149	11.0541	10.6439	10.6793
ARPC2	12.5796	12.642	12.2468	12.3954	12.6844	13.2068	12.748	13.0799	12.983	12.5807	12.4727	12.1976	12.945	12.452	12.8665	12.8179	12.4216	13.1176	12.8079	12.3643	13.0782	12.059	12.0138	12.0158	12.0844	12.0299	12.0072	11.9992	11.9703	12.2912
ARPC3	11.6951	11.5857	11.4222	11.5012	11.7018	12.5668	11.4067	12.242	12.2211	11.7274	11.6322	11.4639	12.1394	11.5258	11.8983	11.7911	11.9041	12.3843	11.9947	11.4712	12.5139	11.4295	11.4021	11.3728	11.3915	11.3907	11.4331	11.3047	11.2876	11.4343
ARPC4	11.6414	11.7235	11.6629	11.6206	11.9247	12.4891	11.6282	12.1863	11.9528	11.7578	11.5347	11.5257	11.9457	11.6147	11.7096	11.7072	11.8739	12.1336	11.8081	11.5591	12.4231	11.3407	11.4545	11.2641	11.3516	11.3286	11.4666	11.4912	11.5751	11.4449
ARPC5	10.4628	10.4819	10.291	10.4622	10.6298	11.2229	10.8631	11.0278	11.006	10.6638	10.5539	10.359	10.9422	10.4651	10.7771	10.7155	10.4422	11.3027	10.8778	10.4364	10.8119	10.4459	10.1253	10.2569	10.3147	10.3516	10.3145	10.3182	10.3063	10.683
ARPC5L	9.83787	9.88425	9.60549	9.6093	9.98539	10.4896	9.84375	10.2588	10.1384	9.94908	9.47763	9.43244	10.1668	9.87543	9.98358	9.79311	10.3323	10.305	10.3422	9.88362	10.7233	9.47248	9.64985	9.87	9.80348	9.6535	9.87078	9.96859	9.70054	10.07
ARPIN	11.4104	11.2816	11.3848	11.1498	11.5681	10.954	11.5447	11.6182	11.3554	11.1866	11.3696	11.3361	11.0927	11.2969	11.3475	11.6702	11.0894	11.2416	11.1534	11.2799	11.2365	11.116	11.3533	11.1051	11.0781	11.2258	11.0965	11.2662	11.2173	11.0322
ARPP19	12.2272	12.108	12.3224	12.1978	12.1402	12.0781	12.0302	12.1509	12.4961	12.4542	12.257	12.2804	12.215	12.1581	11.999	12.3795	12.2782	12.3365	12.0746	12.0496	12.2763	12.5577	12.3884	12.3473	12.3003	12.335	12.3529	12.4927	12.3581	12.5826
ARPP21	7.40976	5.72776	5.8761	5.09392	5.28367	5.50163	2.80777	5.49972	4.48225	5.36321	2.84026	7.49163	6.45594	5.01058	4.18413	4.24879	6.89512	4.98881	6.10986	5.03751	4.65953	7.01888	8.122	6.09884	6.70154	5.91717	7.34967	6.31187	6.07709	6.61318
ARR3	6.53869	7.15781	7.37349	7.2813	7.43904	6.93694	7.06087	6.90011	7.0223	7.20661	7.4992	7.58794	7.05722	6.82705	7.48987	6.91433	7.06057	6.80864	6.84524	7.43788	6.45365	7.70347	7.70169	7.40592	7.63928	7.93895	7.52233	7.67993	7.54489	7.16858
ARRB1	12.0658	12.0941	11.7666	12.1676	12.5655	11.5024	13.0637	12.7925	12.4197	12.0357	12.0222	11.8935	11.9791	12.5094	12.4417	12.6862	11.457	12.1535	12.1347	11.9769	11.934	11.415	11.2786	11.503	11.1326	11.1502	11.0541	11.2077	11.1253	11.145
ARRB2	10.6967	10.827	10.4506	10.8053	11.2184	10.8853	11.703	11.496	10.9701	10.5661	10.622	10.6034	11.1377	11.0326	11.3379	11.0774	10.5156	11.0332	10.6845	10.8336	11.0449	10.1042	10.0966	10.2455	10.216	10.5795	10.2436	10.7339	10.6312	10.3795
ARRDC1	10.887	10.9017	10.687	11.0571	11.0161	10.6174	11.3143	11.0178	10.6121	10.8282	10.7229	10.7108	10.6098	10.8304	10.8777	10.7288	10.5586	10.5241	10.9532	10.8619	10.5428	10.6292	10.3551	10.4927	10.574	10.7708	10.6585	10.7774	10.8641	10.5087
ARRDC1-AS1	9.5861	9.6664	9.57013	9.55122	9.70744	9.48529	9.82387	9.55704	9.43278	9.46251	9.48356	9.51771	9.32825	9.5347	9.60506	9.53014	9.40133	9.42512	9.77042	9.74974	9.50599	9.25076	9.34495	9.10179	9.30246	9.1807	9.17462	9.49051	9.40986	9.23957
ARRDC2	10.3681	10.4407	10.0799	10.4719	10.9461	10.2255	11.2593	11.075	10.3904	10.2063	10.3438	10.2457	10.9709	10.8145	10.724	10.9429	9.38086	10.6761	10.3082	10.6623	9.84335	10.0014	9.64385	10.8782	10.6561	9.22385	9.71796	10.3282	9.79971	10.4369
ARRDC3	12.3766	12.0138	12.604	12.2482	12.2097	12.3103	12.1891	12.1842	12.4165	12.3982	12.5357	12.2174	12.432	12.0783	12.2168	12.3898	12.4431	12.8131	12.6825	12.2755	12.584	12.7988	12.5142	13.0093	13.0917	12.5754	12.738	11.9935	12.0731	11.869
ARRDC3-AS1	8.15526	8.00611	8.54553	8.3343	8.66482	8.35222	8.45776	8.11444	8.26536	8.2919	8.34367	8.45638	8.34012	8.1754	8.38563	8.05192	8.66814	8.41884	8.70965	8.45531	8.37708	8.80519	8.38199	9.1205	9.4295	8.63043	9.10797	8.32952	8.22543	8.36089
ARRDC4	10.9458	10.3278	10.5583	10.715	10.4647	10.8776	11.0998	11.0291	11.1329	10.9793	10.8719	11.0004	11.6916	11.1943	10.5593	11.1701	11.0666	11.0745	11.5863	11.0338	10.6933	11.5578	11.4564	11.2569	11.7486	11.0036	11.3367	11.6537	10.8753	11.5021
ARRDC5	5.98106	5.6916	5.49726	6.94302	7.54771	5.0172	7.13218	7.23796	6.03255	5.19908	5.70141	5.90403	6.07366	7.33775	7.45732	7.3865	3.96924	6.51027	6.00247	5.8761	4.8885	4.58565	4.95501	5.32096	5.20982	5.65243	4.08979	5.2156	5.93494	4.49962
ARSA	11.6999	12.3173	12.2076	12.1623	11.9905	11.7108	11.7469	11.6837	11.8784	12.026	11.9664	12.0312	11.8632	12.0668	11.9097	11.5906	11.4675	11.3712	11.8645	12.2252	11.5917	12.0583	11.6354	11.9569	12.0363	12.0799	12.0006	12.0939	11.9987	11.8756
ARSB	11.8623	12.4084	13.0623	12.1834	12.3266	12.7646	12.0641	12.4556	12.452	13.2109	12.6022	13.1011	12.4443	13.0811	12.575	12.176	12.9548	12.5613	12.2004	12.9171	12.6825	12.1364	12.7177	12.7037	12.9679	12.7487	12.9366	12.4815	12.8585	12.3571
ARSD	12.657	12.533	12.6792	12.536	12.4598	12.4532	13.4283	13.1826	13.524	12.6136	12.7829	13.3647	13.0005	13.1208	13.3008	12.6442	13.2218	12.3281	13.3816	13.4958	12.5703	12.7781	12.9039	13.1895	12.4069	13.386	12.6811	12.6061	12.8835	12.6201
ARSE	11.0167	11.551	11.828	11.3463	10.8799	11.4708	10.3385	11.1955	11.79	11.328	11.2628	12.3629	11.7918	11.8443	11.1835	10.4764	12.5664	10.978	10.9508	12.0344	11.549	12.0166	12.2485	12.538	12.0957	12.6582	11.9661	11.8151	11.8667	11.6364
ARSF	7.84811	8.37436	9.01452	8.83077	7.54771	8.79066	6.69963	7.97686	8.17219	7.98659	7.69361	9.47775	8.51687	8.45872	8.99025	7.26686	10.9346	8.53349	6.92254	9.54094	8.11465	9.08113	10.1471	9.99358	9.00306	10.0733	9.79565	9.18618	9.28295	8.83717
ARSG	9.51537	9.27331	9.57013	9.63682	9.47033	9.55079	9.36601	9.49704	9.24105	9.34002	9.54073	9.64776	9.88696	9.61609	9.46786	9.64974	9.33586	9.49803	9.08548	9.41006	9.68309	9.44077	9.16992	9.54122	9.5285	9.84666	9.45715	9.40095	9.30854	9.47018
ARSI	7.20161	7.77992	7.72887	7.67175	8.16897	7.8778	7.23318	7.67345	7.31585	7.49615	7.21656	8.138	7.89401	8.26795	8.03659	7.12034	8.58269	7.35598	7.66311	8.13825	8.24432	8.35978	8.38725	8.73848	8.92288	9.0139	8.0067	8.12111	8.49622	8.118
ARSJ	10.1778	10.0469	9.71242	9.92001	10.6252	10.5796	10.5912	10.3395	10.441	10.7452	10.5242	9.9105	10.4653	9.85898	10.647	10.5202	9.93671	9.9393	9.9985	10.1749	10.1417	9.56303	10.3645	9.33964	9.87339	9.95049	9.76142	10.2241	10.0946	10.5087
ARSK	8.08201	8.10925	8.44649	8.07257	7.93151	7.51598	7.86928	7.6193	7.93478	8.23585	8.34625	8.25627	7.99822	8.34577	8.18981	7.90991	8.35287	7.70727	8.21937	7.93478	7.35548	8.45204	8.90559	8.57275	8.47412	8.62438	8.4286	8.52148	8.17042	8.39657
ART4	7.53153	7.75797	7.72887	7.96749	7.99009	8.6215	4.60367	8.26855	7.79754	7.43501	7.26771	8.145	8.45332	8.63043	6.70931	8.59087	7.40015	8.84494	6.87983	7.12371	8.04892	7.14633	7.4044	7.83195	6.94998	7.54822	6.70328	7.50428	7.15133	7.12565
ARTN	6.6774	6.95982	7.19174	7.1181	6.45365	7.11402	6.02553	6.55748	6.50065	7.22618	6.39155	7.0137	6.20346	6.47893	6.78495	5.73197	7.25644	6.55942	6.95375	7.2813	7.09816	6.94907	7.2904	7.20116	7.39237	7.24661	7.12683	7.45764	7.29081	7.57173
ARV1	9.02792	8.77753	9.23499	9.17621	8.73227	9.43264	8.64824	8.86169	9.26809	9.25391	9.20973	9.16725	9.18891	8.67455	8.7943	9.09155	9.46457	9.34789	9.11833	9.01169	9.50599	9.27579	9.60349	9.35796	9.18565	9.35043	9.35639	9.32037	9.16309	9.34668
ARVCF	11.1624	11.4627	11.1491	11.4594	11.4254	10.6116	11.7993	11.1119	11.2715	11.2701	11.1443	11.6988	10.8116	11.4784	11.7759	11.0723	10.6529	10.4053	11.5602	11.3032	10.1444	11.4634	10.8629	11.1443	11.0233	11.3782	11.1722	11.642	10.9465	11.1386
AS-PTPRE	7.79048	7.88062	7.0137	7.47938	8.2793	7.18143	9.24163	8.62466	7.82559	7.38272	7.83485	7.23766	7.84153	8.13298	8.36609	8.42411	6.316	7.82065	7.76204	7.18469	6.27196	6.36715	6.72965	7.21601	7.40303	6.64165	6.5011	6.95375	7.27509	7.3508
ASAH1	13.0717	13.516	13.9154	13.5205	12.8844	13.5899	13.2776	12.6731	13.4994	13.3415	13.3836	13.5472	13.6121	13.6418	13.2218	13.0765	13.8357	13.4161	13.3163	13.6206	13.5579	13.5472	13.687	13.4147	13.8109	13.7436	13.7126	13.3073	13.7886	13.6937
ASAH2B	6.1625	6.75599	6.96489	5.97548	5.41845	7.4188	5.99789	6.69536	6.37087	6.51921	6.79477	7.33821	6.3747	5.98106	6.57982	6.63071	7.15992	6.34671	6.766	7.16858	7.34347	7.11946	6.86719	6.79317	6.84655	6.98798	6.97115	7.09513	7.25783	7.42834
ASAP1	11.5288	11.4509	11.2869	11.5675	11.8208	11.3382	12.0239	11.7863	11.6765	11.3608	11.382	11.2516	11.515	11.7694	11.9919	11.9908	10.6188	11.5311	11.6741	11.2631	11.3161	11.3525	11.0826	11.3641	11.2543	11.1493	11.0121	11.1029	11.0964	11.287
ASAP1-IT1	6.98192	7.09852	7.07214	7.16488	7.60268	7.39237	7.77425	7.49256	7.35312	6.82935	7.24481	7.32763	7.28277	7.58613	7.61921	7.76342	6.74773	7.0317	7.5058	7.12371	6.81072	7.11946	7.48248	7.32572	7.31012	7.16748	7.34967	7.492	7.32231	7.33425
ASAP1-IT2	7.06983	6.70761	7.23823	6.95982	7.54771	6.80688	7.41462	7.2686	7.18037	6.88857	7.11928	6.86682	6.78372	7.43788	7.3616	7.56873	6.66947	6.73212	7.42784	6.93402	6.41452	7.36591	7.4044	7.48199	7.46721	6.91999	7.05364	7.06336	7.08886	6.8859
ASAP2	12.5086	12.4703	12.6603	12.6377	12.3879	12.227	12.5059	11.9737	12.397	12.6146	12.8205	12.6969	12.0579	12.2842	12.4821	12.7113	12.4308	12.3581	12.5225	12.4805	12.2288	12.81	12.7085	12.7053	12.6508	12.7037	12.827	12.4973	12.9785	12.6609
ASAP3	11.4937	11.699	11.5624	11.3433	11.4462	11.285	11.5857	11.274	11.2929	11.4387	11.6037	11.6404	11.198	11.5802	11.2757	11.4169	11.6298	10.9761	11.2858	11.6498	11.4304	11.4515	11.7884	11.5834	11.9207	11.814	11.4796	12.1601	11.7094	11.6364
ASB1	11.4754	11.362	11.2559	11.2853	11.5199	11.3772	11.5361	11.6252	11.4564	11.4893	11.2608	11.2958	11.3504	11.2839	11.3319	11.4162	11.4067	11.5602	11.313	11.4077	11.6462	11.2773	11.3631	11.181	11.446	11.4259	11.3	11.3149	11.2778	11.134
ASB13	11.79	11.9467	12.2208	11.8243	11.4287	12.2216	10.9652	11.3959	11.5123	11.5834	11.4849	11.9734	11.6118	11.5542	11.0718	11.3308	12.589	11.8504	10.9278	12.016	12.3093	11.9312	12.0625	12.0443	12.0423	12.2597	12.1628	11.9457	12.2546	11.7219
ASB14	7.31037	7.49126	7.69769	7.26886	7.35831	6.89333	7.13218	7.34122	7.49163	7.31339	7.75082	7.46177	7.35558	7.54453	7.34967	8.00997	7.70489	7.26771	7.61939	7.54847	7.67484	7.41172	7.68085	6.98023	7.22708	7.48117	7.49407	7.42737	6.92174	7.23703
ASB15	8.0165	6.74186	9.71242	8.72933	6.75915	6.69963	2.65078	5.84066	6.62391	7.74392	7.0137	9.47775	7.14489	8.98077	5.32325	7.6722	9.09678	7.36979	5.94367	7.98944	9.00958	9.90106	10.1013	10.4514	10.2348	10.2558	9.92092	9.86531	9.94908	10.0595
ASB16	8.40764	8.4175	8.36195	8.47557	8.56798	7.30964	8.74983	8.07257	7.74488	8.1348	8.4286	8.56722	7.67577	8.66013	8.1628	8.50439	7.64792	7.5383	8.25096	8.33441	6.58362	8.63789	8.37636	8.36668	8.45844	8.55962	8.42119	8.54588	8.64857	8.05617
ASB16-AS1	8.39487	8.45407	8.63917	8.71169	9.10687	8.08961	8.84373	8.09842	8.25426	8.44761	8.70435	8.50878	7.74263	8.58103	8.68422	8.89218	7.94565	8.13893	8.51335	8.44761	7.45515	8.62438	8.51304	8.42323	8.45844	8.5889	8.62907	8.73103	8.45407	8.24908
ASB2	9.22055	7.3616	6.7403	7.54632	8.13398	7.09188	7.45316	8.24221	7.28569	6.08287	7.05364	7.18226	7.45365	7.39317	7.92279	7.86283	6.08669	7.88548	5.63008	6.71551	6.73228	6.28829	6.2275	7.0701	5.8761	6.26188	6.58609	6.42882	6.26869	6.79635
ASB3	6.06397	5.83852	6.80404	5.67859	6.45365	5.6082	6.58609	6.03837	5.82734	6.23617	6.31246	6.22516	5.88505	6.50899	6.79635	6.56625	6.62346	6.45365	6.23002	6.18622	6.15057	6.23796	6.14264	5.79601	5.72836	6.33931	6.09921	6.13288	6.03765	6.26767
ASB5	7.71781	2.89238	4.47228	2.57702	3.43834	2.98333	3.83624	3.35398	2.77786	2.72867	2.84026	3.52213	2.71841	3.09112	3.97592	1.28352	5.00902	3.22495	3.98516	4.35131	3.31022	3.49109	5.90439	4.63467	4.34684	4.31694	4.08979	4.41617	4.87722	5.28491
ASB6	10.7298	10.8697	10.7765	10.6896	10.8315	10.6726	11.0875	10.8454	10.567	10.8844	10.6806	10.8295	10.6592	10.7974	10.7683	10.7807	10.839	10.4254	11.0236	10.8501	10.1996	10.757	10.635	10.6254	10.5641	10.6406	10.7992	10.7066	10.795	10.6062
ASB7	10.2935	10.2377	10.3245	10.3203	10.2942	10.2923	10.3243	10.273	10.1858	10.2636	10.1685	10.2131	10.3595	10.2455	10.2305	10.3266	10.5089	10.3794	10.2369	10.3038	10.6623	10.3012	10.5463	10.3046	10.3954	10.3986	10.3343	10.3461	10.1349	10.3273
ASB8	10.892	10.8082	11.0478	10.8616	10.7698	11.1588	10.7251	10.6456	10.8867	10.7218	10.7108	10.8996	10.9625	10.7551	10.611	10.8181	11.3877	11.1578	10.6893	10.9643	11.1933	10.7815	11.2432	10.8982	10.8989	11.0866	11.007	10.9121	10.9059	10.683
ASB9	8.38079	8.93517	9.91819	8.99895	8.16897	8.94732	7.57538	7.92635	8.7765	8.8058	8.64742	9.59496	8.5889	9.05711	8.1257	8.34625	10.4012	8.6883	7.26873	9.35489	9.29715	10.0041	9.76	10.3679	10.0211	10.2226	10.02	9.61157	10.142	9.72833
ASB9P1	6.36574	5.59384	6.08703	6.36895	6.32472	5.96115	6.56969	6.35837	5.45904	6.10478	6.69985	6.19279	4.98881	6.33083	6.30462	6.12818	5.96787	5.49322	6.70154	6.47564	5.10163	6.41147	6.78209	5.94614	6.06187	6.26188	6.92843	5.6444	6.03765	6.26767
ASCC1	10.2205	10.1534	10.1854	10.267	10.2171	10.252	10.1367	10.1735	10.4137	10.2687	10.2037	10.1631	10.5087	10.2785	10.3325	10.3415	10.2402	10.3687	10.3766	10.3125	10.3825	10.3214	10.3382	10.0806	10.0903	10.1347	10.171	10.0037	10.0985	10.1364
ASCC2	11.2268	11.3603	11.3006	11.3591	11.4046	11.4801	11.7977	11.2982	11.1824	11.3475	11.1794	11.238	11.4192	11.3051	11.365	11.2618	11.3925	11.3596	11.3376	11.2951	11.2047	11.2341	11.2568	11.1208	11.0753	11.2417	11.318	11.2248	11.4056	10.988
ASCC3	11.4496	11.2799	11.1742	11.3026	11.2809	11.1019	11.222	11.3676	11.3914	11.4944	11.7227	11.0034	11.6728	11.4192	11.5714	11.56	10.7844	11.3519	11.7936	10.8236	11.0363	11.2032	11.1032	10.8697	11.1268	10.9425	11.1084	10.9772	10.9805	11.0587
ASCL2	5.94218	6.00391	5.99789	5.4136	5.99472	6.74052	6.94199	7.29226	6.68799	5.54957	5.26484	5.93453	6.22359	5.91654	6.62962	6.30462	7.06057	6.52289	6.42051	6.31656	5.65243	6.02553	5.02712	5.94614	5.27303	5.56592	5.70613	3.41484	6.26869	4.49962
ASF1A	9.30246	9.09054	9.18108	9.11342	9.35983	9.31356	9.08778	9.40768	9.41653	9.35311	9.54073	9.20845	9.4116	9.27834	9.31136	9.33125	9.59939	9.46064	9.13963	9.12823	9.37499	9.41454	9.23717	9.25459	9.21422	9.23859	9.44044	8.96015	9.35623	9.29051
ASF1B	6.84426	7.38827	6.30462	5.4136	7.13598	7.77406	7.74036	7.45116	6.82158	6.30966	6.10894	5.73244	7.2381	6.53249	7.52565	6.58835	6.21337	7.11946	7.48737	6.33875	7.14489	5.45154	6.03651	4.82335	4.93467	5.80159	5.35747	6.28313	6.63555	6.03049
ASGR2	6.33828	7.17103	5.9712	6.66105	6.40471	7.53264	6.14881	7.12422	6.4178	5.94614	6.31246	7.22618	6.27488	6.52127	7.21383	6.19134	7.54192	6.80864	6.60029	6.47564	6.56099	5.8402	6.85026	6.51005	6.52495	6.20734	7.1082	5.61087	5.9731	5.49529
ASH1L	13.8929	13.5579	13.6141	13.8109	13.7886	13.6243	13.9702	13.8739	13.8269	13.7357	13.9241	13.7747	13.8862	13.7949	13.8896	14.1473	13.7539	13.9691	13.6583	13.6985	13.5927	13.7148	13.8381	13.7577	13.7455	13.6985	13.7105	13.6035	13.6475	13.5912
ASH1L-AS1	7.54282	7.77992	7.68743	7.61833	7.84641	7.61136	7.90834	7.67345	7.45182	7.88569	7.64735	7.89136	7.53532	7.79459	7.48987	7.64275	7.57385	7.73541	8.00853	7.87338	7.54873	8.05236	7.58904	7.94123	8.07508	7.929	7.94807	8.30961	8.12397	7.97515
ASH2L	10.9979	11.0387	11.2329	10.9602	11.0637	11.3603	11.089	11.1955	11.2263	11.0224	11.1175	11.2855	11.2346	11.1187	10.9701	11.1889	11.5293	11.171	10.8823	11.3269	11.4608	11.2286	11.3878	11.3151	11.3207	11.4126	11.3209	11.0311	11.3137	11.1475
ASIC1	7.59152	8.35623	6.9471	7.95866	7.64934	7.25783	6.94199	7.29226	6.87153	7.27935	7.76047	7.50206	6.65272	7.10835	7.80243	6.74573	7.93774	6.66852	8.29134	8.56125	6.25089	6.66123	7.11253	6.48554	6.33223	8.1496	9.13696	6.90122	8.28316	6.36895
ASIC2	7.14769	6.95982	6.45308	7.08824	7.11216	7.83302	6.6058	7.74149	7.46542	7.17721	6.82522	6.50711	6.78372	6.74573	7.61921	6.67335	6.70973	5.64213	9.46399	6.26528	6.75171	7.65093	6.74492	7.33949	7.42563	7.14907	6.92843	6.90122	7.08886	7.70042
ASIC3	7.37683	7.31305	8.1593	7.56197	7.08886	6.41147	7.20294	6.69536	6.54699	7.77639	7.50844	7.36553	6.49196	7.52255	6.47494	7.26686	6.95311	6.55942	7.73175	7.21905	6.12328	8.35978	8.19647	7.72552	8.64619	8.21294	7.79908	8.06951	7.78254	8.16504
ASL	11.7586	12.1736	12.4453	12.1334	11.642	12.5296	10.9506	11.5388	11.7963	12.2983	11.9195	12.4503	11.9251	11.8556	11.531	11.5834	12.9898	12.1417	11.9108	12.398	12.8247	12.3097	12.5166	12.6901	12.3229	12.6082	12.271	12.4323	12.4168	12.4686
ASNA1	11.3075	11.6817	11.4055	11.2863	11.3049	12.253	10.8869	11.7608	11.6714	11.4994	11.2223	11.3778	11.5683	11.1943	11.2664	11.0233	11.9741	11.7265	11.3523	11.5237	12.2081	11.3165	11.3547	11.2409	11.3194	11.413	11.4131	11.4385	11.5413	11.328
ASNS	9.15608	8.98407	8.67184	9.40545	8.94944	8.96047	9.12823	9.17404	9.24105	9.18108	9.41391	8.63112	9.61366	8.96653	9.15654	9.25175	8.51989	8.79338	9.63398	9.01744	8.145	8.7495	8.60237	8.53412	8.93539	8.59556	8.48625	8.97493	8.56253	8.64131
ASNSD1	9.51537	9.38721	9.81348	9.77042	9.20322	9.84592	9.31718	9.7625	9.8654	9.64202	9.61157	9.84236	9.84592	9.55882	9.46786	9.72582	10.1009	9.88643	9.52136	9.54094	10.0118	10.1302	10.2842	9.99512	9.80143	10.0943	9.82726	9.6916	10.0132	9.97391
ASPA	9.55931	9.49736	10.4787	10.2063	9.25991	9.52136	9.03182	8.81041	9.21748	9.37105	9.62534	10.6482	9.78445	9.98795	8.82581	9.26217	11.0894	9.97727	8.20442	9.95913	10.5261	10.9082	11.2638	11.1576	11.1058	11.0244	11.0456	10.6597	10.9571	10.5994
ASPDH	10.5444	10.8896	11.8046	11.035	10.2506	10.8869	8.69831	9.74433	9.57906	10.5661	10.084	11.1995	10.1939	10.8217	9.85482	9.55491	12.1559	11.0538	8.8616	11.2586	11.8317	11.4942	11.3511	11.828	11.8197	11.6362	11.9035	11.5139	12.0178	11.5926
ASPG	9.83787	10.158	10.2382	10.1171	10.3167	10.7778	8.39921	10.3939	9.91489	9.99188	7.79174	11.3888	10.2526	11.2007	8.75872	9.23821	10.183	9.35387	9.85898	11.0135	9.36601	11.1482	10.5853	10.4978	10.3409	11.2258	10.9589	11.996	10.8354	9.23582
ASPH	12.1402	12.185	12.2042	12.0819	11.8618	12.0382	12.006	11.9363	12.0611	12.033	12.1631	12.2205	12.1278	12.1563	12.2363	12.1573	12.2182	12.0347	12.3443	12.157	12.2119	12.2275	12.2195	12.0811	12.0498	12.1907	12.4032	11.9632	12.2275	11.957
ASPHD1	7.16006	7.99059	7.0137	6.94302	7.90096	8.55431	6.82451	7.82902	7.93478	6.88857	7.33576	6.9005	7.86224	6.4365	7.44643	7.16829	6.51152	7.61355	8.28063	7.93478	8.54717	6.5753	5.87065	6.06397	7.21047	6.26188	6.19975	7.79007	5.88266	7.12565
ASPHD2	8.20102	8.01072	7.73797	7.85314	8.18904	8.43619	9.45501	8.59416	8.43709	8.38237	8.39237	7.53339	8.70312	8.19138	8.69244	8.47606	8.27015	8.09629	9.02691	8.16862	7.40252	7.71903	8.45531	7.62758	8.03451	7.63449	7.64965	7.45764	7.98306	7.50455
ASPM	6.77669	6.98822	5.49726	5.27906	6.67335	6.17508	6.6651	6.92757	7.26938	6.38549	5.84066	5.28491	6.54787	5.61595	7.2686	6.52083	5.65949	5.98376	7.15165	5.15136	6.06566	5.7881	5.73197	5.25204	5.44522	6.18115	4.83694	6.28313	6.23759	5.35747
ASPN	8.40042	7.9342	8.34224	8.43129	7.03461	7.79486	7.03527	7.39317	8.03335	8.3571	7.66311	8.3651	7.46542	7.84579	7.72103	7.96172	8.10627	7.9145	7.61939	7.10835	7.40252	8.37037	8.18559	8.92986	8.29203	8.15917	7.55415	7.492	7.90293	7.9056
ASPRV1	6.81139	7.53276	7.8466	7.60874	7.31819	7.36591	7.34993	7.63182	7.24495	7.14784	7.61442	7.97332	7.47588	7.49934	7.2796	7.58893	8.16533	7.56602	6.75171	8.29351	8.04892	7.83541	8.10258	7.84579	7.58468	8.15917	7.96772	7.78071	8.02511	7.57173
ASPSCR1	10.8909	11.2865	11.2727	11.2077	10.8736	10.8998	10.8022	10.8203	10.7524	11.0054	10.9966	11.3424	10.5297	10.9938	10.6571	10.5753	11.2484	10.6957	10.8544	11.2879	11.0114	11.2241	11.0117	11.2614	11.2503	11.3516	11.3419	11.3606	11.394	11.2333
ASRGL1	11.1473	10.7377	11.6373	11.1532	10.9285	12.0224	10.4631	11.1371	10.5827	11.0502	10.9675	11.044	11.41	10.15	11.1701	10.6205	11.45	11.6204	11.4104	11.6909	11.348	11.5175	11.1326	11.1282	10.9056	10.4273	11.9	10.7052	11.4583	11.2333
ASS1	15.3319	15.6078	16.3555	15.7146	14.8918	15.7146	13.2013	14.494	15.1403	15.4597	15.1677	16.0754	15.0446	15.7543	14.0223	14.9337	16.6193	16.263	14.1576	15.8845	16.4858	16.263	16.4858	16.6807	16.263	16.1023	15.9452	16.2286	16.045	16.3976
ASTE1	8.78965	8.49777	8.85277	8.57702	8.57275	8.85215	8.79125	8.69625	8.76855	8.68519	8.95318	8.75872	8.86767	8.77656	8.83511	9.0469	9.02295	8.78236	8.48556	8.67949	8.31607	8.43992	8.88716	8.43856	8.1847	8.66439	8.40605	8.36222	8.48284	8.26795
ASTN2	10.9444	10.7095	10.9311	10.8404	11.0321	11.0948	11.416	10.6541	10.9394	11.1918	11.2157	10.8955	10.8449	10.6654	11.1484	11.0074	11.1212	10.7306	11.388	11.1965	10.8709	10.531	11.4167	10.7994	11.1281	11.4567	10.8516	11.0023	11.5836	10.667
ASTN2-AS1	7.7789	7.3616	8.18974	7.75295	7.63449	7.63928	7.79831	7.16858	7.76828	8.30169	8.4446	8.00887	7.50742	7.66905	8.06881	8.09417	8.43414	7.36979	8.5683	8.04398	7.15949	7.76147	8.73779	7.87015	8.62438	8.99005	8.24699	8.57608	8.92386	8.03165
ASXL1	12.9134	12.7721	12.5525	12.6946	12.9679	12.6984	13.3215	13.0623	12.8104	12.81	12.8006	12.5734	12.8982	12.8153	12.9175	12.9741	12.4696	12.8362	12.9726	12.7582	12.6431	12.551	12.6165	12.6411	12.7508	12.5484	12.4883	12.6101	12.441	12.5494
ASXL2	12.3394	12.257	12.1358	12.2605	12.4165	12.3604	12.6162	12.5457	12.3756	12.2045	12.3258	12.232	12.5699	12.3923	12.4372	12.5391	12.213	12.4234	12.0994	12.3665	12.176	12.1645	12.2943	12.1907	12.2004	12.1952	12.1945	12.2241	12.267	12.0529
ASXL3	10.0837	9.80211	9.85431	9.81318	10.1204	10.0054	10.388	9.81901	10.1098	10.2531	10.3756	9.95663	9.94708	9.63714	10.0699	10.2513	10.3019	10.0774	9.9768	9.9225	9.74108	9.95678	10.4211	9.92074	10.1688	10.2194	10.1144	9.77284	9.9078	9.91647
ATAD1	10.9482	10.8235	11.0168	10.9866	10.8142	10.9666	10.8321	10.7033	10.9618	11.0755	11.0948	10.9409	11.0574	10.9074	10.8475	10.9348	10.9445	10.9925	11.0818	10.6973	10.8168	11.1115	11.2568	10.9675	11.0644	11.113	10.9916	11.0116	10.9035	11.1566
ATAD2	8.83133	8.70555	8.48556	8.75015	8.69968	8.52214	9.06346	9.16848	8.87002	8.75235	8.62087	8.37171	9.06573	8.68266	9.22577	8.99186	7.94565	9.0506	8.88257	8.05952	8.3879	8.29024	8.29696	8.36668	8.17746	8.24298	8.0067	8.22882	8.15285	8.49478
ATAD2B	11.3177	11.0493	11.0846	11.2056	11.3719	11.0614	11.4859	11.4384	11.3567	11.1624	11.3578	11.2031	11.5069	11.3874	11.4094	11.4726	11.058	11.5462	11.2713	11.0576	10.9598	11.3127	11.3779	11.2118	11.2671	11.127	11.1722	11.3629	11.1113	11.1881
ATAD3A	9.75146	9.99549	10.0082	9.65554	9.77943	9.7345	9.7328	9.71776	9.46382	9.91561	9.67861	9.6132	9.36947	10.0396	9.813	9.09155	9.46457	9.29604	10.224	9.95273	9.20116	10.1791	9.56418	9.52365	9.72117	9.68156	9.87569	9.98091	9.80306	10.1812
ATAD3B	10.7015	10.8184	10.5032	10.6514	10.9871	10.1424	11.0629	10.4455	10.2645	10.7066	10.7384	10.5302	10.1314	10.6075	10.7123	10.4147	9.9273	9.88395	11.1068	10.7469	9.89294	9.62239	10.4299	10.3298	10.6475	10.5179	10.5399	10.8037	10.5703	10.6556
ATAD3C	8.1337	7.72552	8.30621	7.50082	8.15602	8.88642	8.48508	8.44815	8.88377	8.18981	8.39711	8.57713	8.49777	8.36461	8.26893	8.35186	8.82657	7.64052	8.98915	8.92014	9.09803	7.80525	8.53396	9.09054	8.46793	8.35609	8.27362	8.59352	8.93599	8.46192
ATAD5	8.26679	8.02275	8.4286	8.23956	8.11654	7.61136	8.8832	7.97077	8.15097	8.20379	8.5635	8.21575	8.31607	8.46339	8.33683	8.4705	8.22286	7.96621	8.31228	7.95145	8.16198	8.37636	8.37636	8.42323	8.17746	8.37262	8.21156	8.41121	8.17042	8.2775
ATE1	11.1463	11.131	11.4129	11.1343	11.1849	11.3114	11.0733	11.1576	11.177	11.2612	11.1685	11.2908	11.3888	11.0515	11.1435	11.1974	11.4106	11.392	11.0862	11.3	11.4471	11.4272	11.6687	11.5486	11.4624	11.5209	11.5426	11.4192	11.4822	11.3891
ATF1	9.3906	9.3821	9.48001	9.18639	9.184	9.60169	9.29241	9.50711	9.55759	9.29639	9.26305	9.56631	9.50765	9.3748	9.13509	9.38552	9.90875	9.58806	9.44978	9.44209	9.56218	9.29933	9.68938	9.44786	9.42657	9.41943	9.4821	9.28484	9.39019	9.38436
ATF2	11.5574	11.3053	11.3358	11.3579	11.4197	11.2378	11.3617	11.3862	11.5355	11.328	11.4973	11.4375	11.5683	11.3419	11.4499	11.5859	11.4685	11.4856	11.393	11.3256	11.2683	11.4003	11.4141	11.4002	11.2733	11.3083	11.2946	11.2389	11.2839	11.261
ATF3	7.65613	8.29505	7.76707	7.85806	7.98215	8.56582	7.85641	8.35521	8.24258	8.16876	10.146	7.65845	8.67864	7.59218	8.08155	8.51511	7.47537	8.14619	9.15118	8.79986	8.39407	11.6868	11.014	10.7541	11.8432	12.7184	11.5071	10.2274	12.0627	12.7893
ATF4	12.6492	12.9191	12.3723	12.7725	12.7555	13.527	12.8945	13.6379	13.0116	12.7835	12.4633	12.4638	13.2671	12.5505	12.8793	12.9134	13.1397	13.355	12.7293	12.7253	13.5147	12.1344	12.5195	12.4021	12.4	12.1922	12.3114	12.1026	12.1364	12.7739
ATF5	9.56748	9.73459	9.79864	9.87138	9.9329	9.56661	9.59794	9.79178	9.70845	10.0014	9.7971	9.80306	9.85178	9.83379	9.7703	9.72318	9.57085	9.28534	10.1423	9.76645	9.65969	9.57114	9.37443	9.85928	9.72446	9.70872	9.77736	9.8234	9.6913	10.032
ATF6	12.1964	12.0168	12.1601	12.165	12.1134	12.1417	12.155	12.1575	12.3756	12.254	12.3281	12.1666	12.2804	12.2283	12.2225	12.3151	12.1668	12.2443	12.314	11.9725	12.0777	12.2448	12.2799	12.1883	12.1709	12.2345	12.3213	12.1516	12.1725	12.1212
ATF6B	6.77669	6.69031	6.89417	7.55654	7.42834	0.397764	7.45316	6.01362	0.539065	5.61887	5.65738	5.93453	8.34526	0.397764	5.6537	7.37446	8.00486	6.76352	5.65738	0.538265	5.86461	0.788928	7.97019	1.26631	0.404163	1.65463	6.92843	0.485447	7.16978	5.75174
ATF7	11.4632	11.5028	11.3695	11.598	11.6209	10.9226	11.8117	11.4976	11.2805	11.3888	11.5458	11.4393	11.461	11.6351	11.6827	11.9119	11.0739	11.3472	11.5874	11.5482	11.2346	11.541	11.6061	11.6695	11.6152	11.4752	11.5518	11.3964	11.4454	11.5015
ATF7IP	12.7476	12.5262	12.4922	12.7468	12.7978	12.4176	12.7708	12.8649	12.7872	12.5136	12.9159	12.4825	12.8601	12.7428	12.9114	12.8961	12.3795	12.9207	12.441	12.4703	12.4443	12.6197	12.3848	12.4507	12.1939	12.4417	12.4526	12.1409	12.2871	12.1878
ATF7IP2	9.15608	8.72412	8.88257	9.01696	9.33748	9.18911	8.78564	9.09437	8.91135	8.78328	9.21346	8.742	9.48064	8.80477	9.03268	9.14683	8.76885	9.17204	8.93824	8.8196	9.50127	8.89941	9.15101	8.74382	8.82657	8.63043	9.13093	8.41121	8.67007	8.62604
ATG10	8.49302	8.01683	8.33543	8.50622	8.44706	8.93148	8.59556	8.06065	8.56253	8.4423	8.46422	8.10671	8.65191	8.21827	8.1158	8.32806	8.65363	8.42263	8.69229	8.36222	9.01365	8.5875	8.50867	8.39746	8.41253	8.50982	8.77473	8.39806	8.20336	7.63701
ATG101	9.86755	10.02	9.85151	9.71857	10.0332	10.7377	9.9588	10.4636	10.1758	10.1609	9.95148	9.80502	10.4174	9.83149	9.91339	9.87516	10.5207	10.4021	10.384	10.1013	10.4468	9.73002	10.001	9.99358	10.0693	10.0973	9.85565	10.0155	10.0312	10.417
ATG12	9.43254	9.38721	9.54212	9.54658	9.64075	9.38774	9.66549	9.47206	9.5014	9.37364	9.38755	9.36179	9.64327	9.4512	9.40879	9.66184	9.38086	9.64442	9.28295	9.26257	9.53145	9.67969	9.43441	9.51672	9.52022	9.47417	9.44746	9.37357	9.30015	9.85824
ATG13	12.0759	12.2811	12.0795	12.2613	12.4021	12.5383	12.2832	12.4385	12.4165	12.2343	12.273	12.1834	12.473	12.1466	12.3548	12.3423	12.432	12.3859	12.2108	12.3839	12.3622	12.146	12.1655	12.1589	12.0325	12.1289	12.1888	12.0811	12.1121	11.915
ATG14	10.8146	10.5399	10.7646	10.6609	10.6236	10.5898	10.8293	10.9307	10.822	10.6498	10.7781	10.6599	10.7897	10.727	10.6742	10.7911	10.6134	10.7306	10.6069	10.7085	10.4961	10.8031	10.8744	10.8391	11.1022	10.8417	10.7711	10.6191	10.7817	10.8355
ATG16L1	10.5599	10.7029	10.5583	10.6228	10.8607	11.0136	10.7703	10.6438	10.6859	10.5917	10.6911	10.5726	10.9868	10.6977	10.5793	10.8841	10.6797	10.7992	10.809	10.733	10.9561	10.5888	10.6597	10.3857	10.4056	10.4007	10.4813	10.491	10.4649	10.3614
ATG16L2	11.0251	11.2646	11.0036	11.3827	11.645	10.067	12.398	11.5776	11.0093	10.9822	11.1298	10.9643	10.8669	11.4857	11.5073	11.3661	9.79068	10.5907	11.0103	11.1931	10.2259	10.8697	10.4875	10.5719	10.76	10.6272	10.6665	10.723	10.7015	10.7517
ATG2A	12.104	12.3851	12.2751	12.2418	12.2232	11.0538	12.5097	11.8623	11.6536	12.2616	12.164	12.3072	11.4886	12.3408	12.1767	11.8569	11.5042	11.2319	12.1964	12.246	10.9278	12.213	12.0999	12.1538	12.3534	12.1464	12.0886	12.3443	12.3593	12.1967
ATG2B	12.5635	12.2962	12.2468	12.4082	12.2413	12.0652	12.5764	12.3238	12.4922	12.3855	12.4708	12.3289	12.3554	12.3754	12.5507	12.4332	12.3573	12.4137	12.4298	12.3067	12.3292	12.6234	12.7443	12.4513	12.5109	12.4844	12.4749	12.4786	12.3074	12.3352
ATG3	10.4402	10.4819	10.5492	10.397	10.4093	10.8261	10.4774	10.6094	10.6314	10.428	10.486	10.4514	10.6448	10.4537	10.5376	10.4576	10.833	10.6937	10.6893	10.4725	10.8131	10.3886	10.5561	10.5493	10.4905	10.5866	10.5662	10.2646	10.3719	10.6126
ATG4A	9.22468	9.39033	9.60119	9.08049	8.90816	9.49534	8.67108	8.94651	9.36401	9.53205	9.16066	9.2637	9.45435	9.24938	8.92453	9.35916	9.65731	9.37063	9.17356	9.24123	10.2761	9.45071	9.52548	9.44786	9.58263	9.36401	9.48691	9.34282	9.50295	9.62625
ATG4B	11.724	11.8081	11.8366	11.7085	11.7637	11.4796	11.9192	11.6445	11.5735	11.6245	11.7584	11.7135	11.4	11.7382	11.676	11.4893	11.5059	11.4192	11.6913	11.7352	11.2751	11.8315	11.8341	11.8333	11.8822	11.8053	11.724	11.8026	11.6786	11.7561
ATG4C	8.69584	8.36007	8.82955	8.9389	8.35961	8.8058	8.46339	8.52779	8.73948	8.82097	8.67656	8.74983	8.94744	8.66336	8.40316	8.71338	8.95057	9.08062	8.56332	8.40259	9.33301	9.18028	9.3018	9.21448	9.09464	9.19842	8.98684	8.85046	8.94931	9.00506
ATG4D	10.4278	10.8418	10.7192	10.4385	10.3784	10.4022	10.2913	10.3284	10.3347	10.5259	10.2929	10.6322	10.1262	10.5155	9.89876	9.96803	10.9373	10.139	10.1423	10.733	10.9112	10.6351	10.7171	10.94	11.0691	10.814	10.8677	11.1673	10.9234	10.8972
ATG5	9.83149	9.65487	10.0354	9.74063	9.40238	9.86008	9.52801	9.56459	9.91311	10.0048	9.9099	9.91647	9.8962	9.80716	9.67074	9.90365	9.97727	10.0679	9.88362	9.86381	9.83695	10.1487	10.163	9.94359	9.95648	10.0429	10.0008	9.72334	9.9078	9.90568
ATG7	11.0236	11.0117	10.6258	10.9728	11.0591	11.0859	11.0607	11.2256	11.0669	10.8513	11.0357	10.821	10.949	11.0996	11.1074	11.3151	10.643	10.7005	11.2134	10.7441	11.0897	10.6309	10.8164	10.6759	10.7215	10.7263	10.5905	10.6417	10.7387	10.5839
ATG9A	11.8238	12.0275	11.9579	11.7698	11.9309	11.639	11.8608	11.5953	11.8717	11.9274	11.8178	11.9449	11.7696	12.0268	11.7444	11.8049	11.8149	11.4085	11.877	11.9181	11.4639	11.9104	11.9217	11.9807	11.9346	11.9574	11.7613	12.0792	11.9263	11.764
ATG9B	5.5699	6.29519	6.38217	6.51005	5.76193	4.98441	6.6058	5.80562	6.1968	5.74658	6.36761	6.15487	4.5403	6.50899	6.08287	6.03521	5.74192	5.67585	6.68676	6.15758	5.41151	5.53869	5.90439	6.93436	6.30462	6.15015	6.29624	6.88213	6.07709	7.23703
ATIC	11.1938	11.2307	11.4849	11.4028	11.0608	11.8991	10.9109	11.1182	11.3125	11.2678	11.4285	11.3722	11.368	11.2447	11.1748	11.3623	11.5761	11.6536	11.4534	11.411	11.5993	11.0954	11.33	11.2755	11.3504	11.1533	11.4712	10.9974	11.1624	11.0004
ATL1	8.48783	8.71983	8.61589	8.66141	8.53865	8.79712	8.21968	8.5875	8.7443	8.5197	8.70999	8.80362	8.7091	8.57333	8.61005	8.84949	9.05395	8.8212	8.17774	8.55049	8.36353	8.76818	8.95709	8.51687	8.71169	8.73147	8.83511	8.22882	8.53255	8.31087
ATL2	10.9027	10.5788	11.2615	10.976	10.433	10.7097	10.4453	10.6967	10.816	11.1078	11.0675	11.3302	10.794	10.9963	10.6176	10.7155	11.2794	10.9689	10.6908	10.9387	11.0806	11.5784	11.7083	11.6245	11.5929	11.591	11.4545	11.4834	11.2778	11.7532
ATL3	12.0985	12.0481	12.0088	12.0235	12.2852	12.2828	12.2455	12.3306	12.3359	12.1976	12.027	11.9754	12.3057	12.1762	12.1934	12.4641	11.7846	12.3984	12.3804	12.0252	12.4069	11.9659	11.9225	11.872	11.7554	11.9352	11.757	11.9104	11.7402	11.7267
ATM	12.9872	12.5205	12.5562	12.9569	13.0407	12.4416	13.2098	13.3327	13.0274	12.6442	13.1267	12.6873	13.3477	13.0755	13.2846	13.3122	12.3688	13.4643	12.7635	12.5661	12.6844	12.6925	12.7366	12.5129	12.441	12.4652	12.4032	12.4032	12.438	12.4694
ATMIN	11.4754	11.3202	11.6125	11.3971	11.3115	11.3382	11.24	11.3245	11.42	11.6022	11.3632	11.4918	11.3606	11.3436	11.3827	11.5131	11.5612	11.4113	11.4094	11.3736	11.5747	11.5764	11.7368	11.5308	11.5171	11.5147	11.5156	11.4962	11.5872	11.5407
ATN1	13.176	13.3477	13.2994	13.7331	13.4944	11.9919	13.8929	12.6976	12.7882	13.3855	13.5607	13.2319	12.6069	13.4804	13.5147	13.5621	12.3114	12.1284	13.5205	13.2	11.5804	13.3525	12.8888	13.3691	13.4728	13.2319	13.5983	13.516	13.537	13.4928
ATOH7	2.62713	3.84674	4.90099	5.1523	3.43834	5.28446	2.35352	3.88738	5.06746	2.53374	3.01611	4.51793	5.31279	2.76949	3.41896	4.14954	5.7019	4.47773	4.91292	5.68927	0.398564	5.37231	7.27262	5.10462	4.93467	6.57196	6.88536	3.59711	5.29845	6.19019
ATOH8	9.5861	9.19408	9.4429	9.80892	9.3681	8.76967	10.5983	9.80582	9.52332	8.72796	9.20099	9.66727	9.57808	9.75502	9.37635	9.69973	8.93478	9.7625	9.62603	9.37499	9.21375	9.21523	8.6469	10.0391	9.13428	8.88803	8.47955	9.9105	9.46767	9.66054
ATOX1	10.5875	10.931	10.8349	10.3443	10.6078	11.6263	9.99633	10.9959	10.8365	10.5193	10.2687	10.5577	10.8048	10.457	10.1192	10.409	11.4316	11.4031	9.95062	10.9269	12.5303	10.7091	10.7828	10.7914	10.6391	10.7893	10.7651	10.7817	10.8925	10.7897
ATP10A	10.4126	10.3678	10.5074	10.0072	10.2378	9.91311	9.9192	10.1032	10.1046	10.727	9.67634	10.2226	9.97008	10.2761	10.4648	10.1008	9.79414	10.3878	10.2254	9.6359	10.3147	10.8786	10.2187	10.4864	10.2003	9.98612	10.2526	10.5411	10.2272	10.3781
ATP10D	12.2646	12.1575	12.0302	12.1376	12.3735	12.5136	12.228	12.536	12.5011	12.5473	12.3438	12.0254	12.4835	12.2514	12.2973	12.5547	12.011	12.2907	12.3608	12.2443	12.7048	12.0411	12.1993	12.0654	12.0085	12.2619	11.9831	12.3643	12.1725	12.038
ATP11A	13.7594	13.6598	13.3781	13.674	13.7331	13.3415	13.9286	13.6418	13.5948	13.8693	13.7907	13.429	13.4305	13.2965	13.6704	13.7517	13.2895	13.3517	14.2617	13.5682	13.0774	13.4059	13.7498	13.0388	13.429	13.413	13.41	13.7274	13.2791	13.2602
ATP11A-AS1	8.71857	8.92545	8.41121	8.82069	8.52687	8.68289	9.25316	8.73298	8.56814	8.95984	9.1573	8.64211	8.75085	8.40987	8.71857	8.93087	8.64131	8.26874	9.29429	8.95138	8.27709	8.50867	9.31018	9.01894	9.47576	8.97165	9.12644	9.24383	8.64857	10.8176
ATP11B	11.595	11.2452	11.3972	11.4837	11.3816	11.4119	11.5844	11.6057	11.6536	11.5518	11.4637	11.4955	11.6323	11.4755	11.4788	11.8318	11.3587	11.7718	11.3617	11.3216	11.6754	11.7455	11.7819	11.6688	11.5322	11.5791	11.54	11.5854	11.6272	11.7166
ATP11C	10.74	10.5118	11.0611	10.935	10.7463	10.4734	10.4252	10.744	10.9189	10.9892	10.9282	10.9269	10.8017	11.0197	10.6954	11.0044	10.6514	10.9462	10.7431	10.5226	10.8131	11.2263	11.2664	11.0928	10.9803	10.9918	11.0105	9.72893	10.7903	10.9896
ATP12A	8.11438	5.62066	7.94424	10.8505	6.34809	6.51005	8.99005	8.16924	6.93096	4.95501	9.43467	8.3783	6.10478	9.96337	5.05484	10.2597	8.31453	8.23563	2.43619	7.6892	6.84272	9.25658	9.58032	8.969	9.46173	10.2708	9.50727	8.26795	9.84375	9.58006
ATP13A1	12.0811	12.1859	11.9557	12.2116	12.2293	11.4153	12.2306	12.0142	11.9325	12.1981	12.2482	12.0191	11.7606	12.3116	12.2852	12.045	11.4278	11.3554	12.5457	12.0263	11.0197	11.9298	11.7749	11.7231	11.9007	11.9035	11.9782	12.1501	12.0373	11.8153
ATP13A2	11.4455	11.8171	11.4854	11.5786	11.7677	11.3472	11.916	11.6173	11.5141	11.704	11.4803	11.3109	11.1731	11.6538	11.6362	11.3741	11.0166	10.8996	11.7828	11.652	10.5817	11.2167	11.2517	11.2158	11.3259	11.2703	11.2096	11.5027	11.5245	11.2243
ATP13A3	12.9142	12.7171	12.8553	12.7494	12.5938	12.9014	12.3006	12.8124	12.9458	13.1501	12.8162	12.8016	12.7936	12.7363	12.6446	12.8982	12.8577	12.7688	13.0538	12.6013	13.1659	13.002	13.1297	12.8411	13.0251	12.9039	12.8717	13.0578	13.002	13.2895
ATP13A4	7.53153	7.58659	6.84222	7.2813	6.89859	7.38175	8.28865	7.17964	7.93478	7.25962	8.00887	6.27823	7.28277	7.20436	7.47992	7.92642	6.95311	7.10746	7.9705	8.37925	8.13857	7.01888	6.79953	6.52867	7.95915	8.03225	7.05364	7.29941	7.60499	7.21629
ATP1A1	16.045	16.0105	16.0105	16.045	15.7322	15.8575	16.3976	15.2774	15.7146	16.2286	16.1982	16.4858	15.9764	16.0754	16.263	16.0105	16.2868	15.3912	16.529	16.263	14.8435	16.529	16.8479	16.2868	16.4858	16.4374	16.3976	16.4858	16.3976	16.1982
ATP1A1-AS1	9.82219	9.3616	9.68309	9.41463	9.42456	9.38774	9.90264	9.37063	9.31874	9.4305	9.56844	9.94993	9.63897	9.38936	9.85772	9.45259	10.2421	9.64815	9.79068	9.75602	9.85178	9.18028	9.66274	9.2048	9.51212	9.5285	9.49285	9.94456	9.5246	9.25787
ATP1A2	11.3455	10.7769	10.0401	10.0693	8.75061	7.70747	7.665	8.44815	7.92619	9.17297	9.57786	9.50643	7.24481	10.5187	8.33033	9.63759	8.2811	8.43042	8.32212	9.48784	9.54709	10.3744	9.76366	10.2777	9.60887	9.31756	9.78457	9.53865	9.60749	9.60506
ATP1B1	15.29	15.1148	15.5915	15.3018	14.5897	15.0919	14.454	14.3683	15.3597	15.5279	15.3167	15.6909	14.924	15.1768	14.7925	14.924	15.6267	14.6116	14.8299	15.3489	14.2817	15.909	15.7543	15.9764	15.6267	15.8259	15.7543	15.909	15.5715	16.045
ATP1B2	9.54546	9.45435	10.1803	10.6373	10.0303	8.93148	9.68927	9.09437	9.01906	9.80211	10.2942	10.616	8.70312	9.98795	9.88011	10.0372	9.84026	8.78236	9.94613	9.92478	7.846	11.0618	10.5361	11.1235	10.6677	10.8605	10.6295	10.6749	10.7387	10.2463
ATP1B3	10.7347	10.7955	10.7013	10.6228	10.5428	11.3061	10.5861	10.7302	11.2662	11.0958	10.9616	10.8604	10.6868	10.6114	11.0859	10.9697	10.7218	10.9865	11.4521	10.6526	10.7427	10.8652	10.9123	11.2192	11.2741	10.8194	11.1507	11.4056	10.9134	11.2924
ATP1B4	8.29578	0.435358	0.945074	0.538265	0.397764	0.451356	0.398564	1.56666	0.539065	0.436158	0.397764	0.619439	0.538265	0.445757	0.399364	1.28352	0.876176	0.451356	0.607276	0.538265	2.01244	1.99808	0.419361	2.46295	0.404163	1.65463	1.61608	1.28352	0.434558	0.746673
ATP23	6.23617	6.54355	6.84222	6.90822	6.26528	7.07799	5.97015	7.58893	6.64481	6.13104	6.10894	6.92972	5.94728	6.47893	6.3725	6.45175	7.48758	6.76352	6.37605	6.15758	6.81072	7.15781	7.60892	7.13724	6.5011	7.00482	7.24353	6.62316	6.63555	6.77257
ATP2A1	11.9033	8.44145	8.4286	8.63542	8.19619	7.33127	8.79461	7.75138	7.73032	8.45776	8.59524	8.64644	7.73381	8.41994	8.1628	8.36301	8.40229	7.22082	8.58124	8.37925	6.52495	8.74515	8.78673	8.57275	8.78775	8.63043	8.71877	8.72503	8.68677	8.41074
ATP2A2	14.4889	13.7247	13.6516	13.6683	13.723	13.5113	13.4707	13.6226	13.5388	13.876	13.7331	13.592	13.7105	13.7436	13.6418	13.8202	13.4012	13.5547	13.9015	13.6598	13.5803	13.6002	13.674	13.6379	13.4569	13.5388	13.5563	13.742	13.8406	13.8109
ATP2A3	11.5488	11.2395	10.6233	11.9843	12.0029	10.2119	12.3648	12.0857	11.3475	10.9534	11.6198	10.7024	11.7552	12.0656	12.0504	11.7231	9.65956	11.5952	10.8895	11.4312	9.72334	10.5533	9.70637	10.3857	10.0609	10.0036	10.1404	10.46	10.2976	10.5119
ATP2B1	11.4918	11.2979	11.4615	11.5049	11.3928	11.0468	11.3826	11.4637	11.6462	11.4548	11.4983	11.3288	11.6348	11.539	11.4362	11.6437	11.065	11.7261	11.235	11.2745	11.2377	11.4072	11.575	11.5578	11.2383	11.4036	11.2615	11.434	11.4242	11.8447
ATP2B1-AS1	6.77669	7.38013	7.49396	7.59869	7.35831	7.50529	7.53114	7.54338	7.2322	7.05104	7.51805	7.30333	7.53532	7.06087	7.34967	6.49494	7.54192	7.80467	7.18552	7.20661	7.5592	7.45968	6.99269	7.45316	7.51905	7.14907	7.43788	7.33526	7.41462	7.33425
ATP2B2	6.84426	5.36274	4.90099	6.56044	5.41845	4.8782	6.22516	5.27493	6.26013	5.36321	7.03767	6.50711	3.60077	5.35168	6.01953	6.49494	6.52906	5.28446	5.0756	5.15136	4.58565	6.50952	7.48248	6.40115	6.80738	7.00482	6.82298	5.97886	7.15133	5.75174
ATP2B3	6.23617	6.07279	4.98258	5.8761	5.8864	3.20749	6.71908	4.85774	6.50065	6.90446	6.82522	6.58129	2.99865	3.20749	6.51101	6.33083	6.16595	3.78899	5.02389	4.72613	2.01244	5.93536	7.05868	5.32096	6.06187	6.26188	6.99111	6.13288	6.66485	5.49529
ATP2B4	12.8709	13.0093	12.4945	12.8528	13.2496	12.9814	13.1563	13.3721	13.1959	12.8377	13.0358	12.5762	13.1267	13.1142	13.1612	13.2285	12.3324	13.1501	13.0876	12.7071	13.0551	12.6335	12.451	12.5075	12.3879	12.3707	12.2973	12.5832	12.4983	12.4635
ATP2C1	11.953	11.9033	11.8546	11.927	11.6947	11.8928	11.9935	11.7953	12.113	12.0844	12.1062	11.9114	11.9607	11.8756	11.972	12.0765	11.9694	11.89	12.2023	11.8482	11.8117	12.2067	12.2303	11.9595	12.0172	12.0954	12.0162	11.97	11.9664	11.9114
ATP2C2	9.05758	9.47383	9.56477	9.23921	9.17621	8.94492	8.85619	8.01753	8.7765	9.31674	9.09361	9.56432	8.59416	9.38158	8.08155	8.64595	8.6364	9.7439	8.35287	9.19289	8.7882	9.7703	9.16992	9.49803	9.67955	9.28014	9.64832	9.55257	9.04409	8.52779
ATP5A1	14.4019	14.6339	14.8679	14.6749	14.2779	14.9606	13.9315	14.3356	14.7289	14.7289	14.7772	14.814	14.8515	14.6457	14.5093	14.3734	15.3018	14.7289	14.6018	14.7426	14.7091	14.7629	15.1217	14.6602	14.8841	14.7426	14.8679	14.7699	14.7221	14.7772
ATP5B	14.8515	14.8997	14.9157	14.7925	14.7289	15.2428	14.4019	14.6277	14.9794	15.0446	14.8515	14.8679	15.0354	14.7851	14.6539	14.6178	15.5198	14.924	14.8918	14.9794	14.9976	14.8299	15.1892	14.9076	14.9696	14.9696	14.9892	14.9418	14.9076	14.8299
ATP5C1	12.4341	12.2651	12.6006	12.3276	12.1475	13.0533	11.8884	12.4643	12.7742	12.5762	12.3608	12.5354	12.5754	12.2835	12.1664	12.3003	13.0586	12.8538	12.3318	12.4182	13.2434	12.5324	12.9138	12.6499	12.593	12.6461	12.6976	12.4419	12.5164	12.5909
ATP5D	12.2063	12.3019	12.1874	12.1584	12.1278	12.6372	11.8404	12.325	12.0946	12.0733	11.8818	12.0378	11.947	11.915	11.7872	11.2326	12.5383	12.4354	11.8504	12.2085	12.7789	11.9625	11.8486	12.0946	12.2004	12.1746	12.3057	12.3801	12.5126	12.2211
ATP5F1	12.0803	12.0428	12.3573	12.0091	11.8453	12.6645	11.5918	12.055	12.3206	12.1751	12.0701	12.2146	12.2631	12.0153	11.8705	11.9451	12.7642	12.4812	11.9671	12.1617	12.8451	12.3266	12.4761	12.4122	12.3208	12.4149	12.4	12.0968	12.2405	12.4165
ATP5G1	11.0295	11.0243	11.205	10.6896	11.0684	12.0677	10.7147	11.1944	11.113	11.178	10.7622	11.0472	11.1061	10.9894	10.9094	10.7637	11.7673	11.7677	11.0794	11.3149	12.3841	10.8537	11.0405	10.8735	10.8935	11.0477	11.2848	11.0541	11.2811	11.1021
ATP5G2	12.7708	12.6492	12.4539	12.5542	12.7217	13.4789	12.2627	13.0491	12.8419	12.5505	12.5993	12.5431	12.7872	12.3836	12.6854	12.5868	13.244	13.1826	12.5917	12.7102	13.6598	12.4236	12.4273	12.5228	12.4431	12.4014	12.4985	12.444	12.4336	12.372
ATP5G3	12.4703	12.0974	12.7159	12.2227	12.1462	13.1327	11.5407	12.4596	12.6351	12.5428	12.2261	12.508	12.4874	12.2128	12.0994	12.1222	13.1021	12.7184	12.2296	12.6197	13.6278	12.5569	12.6616	12.4825	12.5219	12.593	12.6088	12.6253	12.5754	12.6048
ATP5H	12.0263	11.8421	11.8491	11.7244	11.8686	12.9482	11.4741	12.3492	12.3391	12.0929	11.7738	11.8829	12.261	11.6913	11.6775	11.8891	12.7843	12.7095	11.9845	11.9996	13.41	11.7927	12.2275	11.8544	11.8445	11.8866	11.9251	11.7152	11.7988	11.7895
ATP5I	10.7882	10.8607	10.7791	10.3954	10.819	11.9674	10.3027	11.2883	11.0497	10.7279	10.4418	10.743	11.1194	10.3941	10.4615	10.352	11.6241	11.6255	10.5344	11.0408	12.7106	10.4843	10.8798	10.6458	10.6307	10.7352	10.6743	10.5185	10.7219	10.6802
ATP5J	10.7085	10.6809	10.8825	10.4839	10.4071	11.5723	10.0962	10.8628	10.9424	10.8663	10.5298	10.6975	10.772	10.3545	10.2417	10.5383	11.4868	11.4171	10.4075	10.8117	12.215	10.9772	11.1055	11.0035	11.017	11.0317	11.1832	10.838	10.8661	10.9379
ATP5J2	9.29251	9.56418	9.32845	9.22431	9.57304	10.3675	9.26155	9.83379	9.59957	9.45295	9.15101	9.11371	9.69286	9.04665	9.31417	9.41006	9.82253	9.92341	9.35769	9.59159	10.5955	9.27348	9.41422	9.71717	9.85721	9.73983	9.81251	9.58348	9.86977	9.94633
ATP5L	11.7022	11.7103	11.7115	11.5687	11.6929	12.8971	11.4755	12.3921	12.0348	11.8077	11.4675	11.4879	12.0908	11.2498	11.5932	11.6861	12.5467	12.593	11.6435	11.7734	13.4315	11.6854	11.8395	11.739	11.7034	11.7702	11.901	11.6236	11.8233	11.8748
ATP5O	12.2085	12.0409	12.0817	11.916	12.0407	12.9699	11.8043	12.444	12.494	12.1404	11.9949	12.0458	12.4479	11.8998	11.8518	12.1668	12.8706	12.8937	12.0825	12.1878	13.4181	11.9686	12.2998	12.0654	12.0968	12.1059	12.1771	11.8761	12.0596	12.0246
ATP5S	9.46536	9.29068	9.61691	9.35639	9.27112	9.32239	9.16207	9.22651	9.36401	9.48886	9.41733	9.64465	9.11704	9.28986	9.24771	9.11132	9.56214	9.21309	9.20116	9.62583	9.16976	9.89781	10.1848	9.92074	9.68293	9.86516	9.90696	9.92267	9.75578	9.68362
ATP5SL	10.8263	11.1459	11.2077	11.094	10.9231	11.5761	10.6333	11.011	11.0224	11.111	10.9616	11.1015	11.0016	10.9572	10.8011	10.6698	11.5833	11.1304	10.8924	11.1943	11.6474	11.0421	11.0317	11.1556	11.1924	11.2239	11.1984	11.2229	11.2393	11.0713
ATP6AP1	12.5813	12.8929	12.8888	12.7701	12.505	12.7677	12.4553	12.2306	12.76	12.8542	12.8082	12.7843	12.5179	12.7991	12.5792	12.6179	12.8334	12.4366	12.6499	12.8115	12.2556	12.826	12.7829	12.8419	12.8813	12.9023	12.8233	13.1216	12.9249	12.8428
ATP6AP1L	8.11438	7.71841	8.51169	7.87623	7.58001	8.11624	8.06668	7.58893	8.18745	8.11545	8.1385	8.17396	7.91002	7.60199	8.29244	8.11601	8.08783	7.81225	8.31228	8.12921	8.31607	8.68756	8.87254	9.02337	9.1162	8.77894	8.969	8.22882	8.96653	7.98481
ATP6AP2	11.6294	11.6929	12.1281	11.911	11.3416	11.835	11.1685	11.4393	12.0189	12.0522	11.9601	12.1263	11.852	11.887	11.7211	11.9038	12.0897	11.8241	11.7828	11.8498	11.5929	12.3894	12.3116	12.2905	12.335	12.5632	12.0731	12.1397	12.1156	12.3575
ATP6V0A1	12.7693	13.1435	13.2643	12.9916	12.78	12.7953	12.1005	12.4165	12.7991	13.1257	12.8763	13.1246	12.7174	12.9527	12.5661	12.8251	13.1154	12.723	12.6226	13.0927	13.01	13.2098	13.2776	13.2218	13.2826	13.3244	13.3756	13.4147	13.4107	13.5718
ATP6V0A2	10.3843	10.4666	10.2641	10.3678	10.4293	10.3221	10.3737	10.4888	10.3886	10.2672	10.2657	10.362	10.5338	10.4011	10.4964	10.6326	10.3141	10.3933	10.611	10.2867	10.2915	10.2261	10.3789	10.1764	10.1464	10.2882	10.0412	10.4033	10.1968	10.2622
ATP6V0A4	12.055	12.1422	12.6139	12.1212	12.1702	12.1361	12.4835	12.0961	12.6698	13.0623	12.5273	13.0418	11.541	12.367	11.8138	12.2081	12.7918	11.5904	11.4112	12.6616	11.6862	13.1188	13.1031	12.8043	12.9486	13.1513	12.7113	13.0341	12.8821	12.9163
ATP6V0B	12.015	12.2004	12.0323	11.8678	12.0257	12.888	11.8333	12.4433	12.4431	12.1939	11.9117	11.9743	12.1492	12.0737	11.7997	11.7534	12.6442	12.3536	12.0981	12.2301	12.9507	12.0968	12.0846	12.1237	12.1241	12.079	12.0123	12.3489	12.2371	12.241
ATP6V0C	12.6987	13.1468	13.2869	13.1176	12.9391	12.9688	12.4221	12.6969	12.8916	13.2765	12.8175	13.1103	12.548	13.0876	12.7092	12.4802	13.0491	12.6734	12.899	13.1873	12.6719	13.1801	12.8153	13.3709	13.355	13.4217	13.4275	13.5783	13.5547	13.5783
ATP6V0D1	12.2507	12.6013	12.6544	12.4111	12.202	12.7366	11.8333	12.2426	12.49	12.4089	12.2341	12.3682	12.1782	12.396	12.1417	12.066	12.6976	12.4069	12.2257	12.4866	12.5139	12.4006	12.3932	12.473	12.4006	12.4954	12.4903	12.6286	12.667	12.5086
ATP6V0D2	10.7808	10.617	11.5918	10.7696	10.4012	10.3963	8.97137	9.22887	11.0241	12.0115	10.8673	11.7951	9.19912	11.2047	9.00573	10.1529	11.5718	10.0263	9.16562	11.1273	10.3477	12.1611	11.8951	11.9885	12.0635	12.4221	11.6358	12.2915	12.0813	12.337
ATP6V0E1	11.744	11.7624	11.8433	11.7162	11.8413	12.6489	11.3381	12.1976	12.3229	11.9827	11.7666	11.7926	11.9992	11.8324	11.5854	11.9219	12.4983	12.4903	11.8345	11.9225	13.1447	11.8968	12.0951	11.9211	11.9015	11.9684	11.8694	11.8735	11.9328	11.8266
ATP6V0E2	11.9153	12.1318	12.8501	12.4018	11.6364	12.2366	10.8916	11.5559	11.6353	11.9225	11.5004	12.1281	12.0875	11.7916	11.4156	11.0819	12.7789	12.2327	10.5997	12.4686	12.4975	12.2002	11.8671	12.4844	12.2878	12.412	12.6734	12.5006	12.5734	12.2225
ATP6V0E2-AS1	7.65613	8.03165	8.16778	7.85806	7.68222	7.42784	8.20468	7.57885	7.64458	8.04865	7.56776	8.21092	7.87874	7.58613	7.92279	7.36553	8.01008	7.8277	7.7821	7.72004	7.00273	7.96576	7.87733	7.93209	7.74263	7.53276	8.32445	8.12886	8.08691	7.41186
ATP6V1A	12.9625	12.9651	13.3256	12.9974	12.623	12.7825	12.6557	12.6642	13.1312	13.413	13.1397	13.3453	12.8476	13.2504	12.8324	12.9712	13.2589	12.7755	13.021	13.2161	12.9823	13.5078	13.6547	13.5154	13.5621	13.6418	13.3855	13.6226	13.6141	13.6357
ATP6V1B1	11.6684	11.5944	12.4092	12.0831	11.5585	11.907	10.8412	11.4243	11.9713	11.5317	11.5207	12.907	10.6228	12.5796	11.2047	11.2735	12.9881	11.4587	9.06965	12.403	11.2645	12.9032	12.6763	12.5799	13.6141	12.9474	12.4225	12.6889	12.5689	12.5342
ATP6V1B1-AS1	7.89524	8.00611	8.74144	8.57702	8.56518	7.74338	7.09022	7.6193	8.31657	8.11545	8.32212	9.6132	6.58129	9.38936	6.96157	8.04304	9.36525	7.59944	5.73327	8.9543	7.50082	9.88156	10.091	9.60985	10.2799	9.55355	9.28582	9.25719	9.15101	8.40493
ATP6V1B2	13.0265	13.0846	13.4888	13.142	12.7505	13.295	12.5324	12.7389	13.0662	13.1477	13.1225	13.5078	13.1985	13.3167	13.1397	12.9215	13.9558	13.2041	12.9544	13.4915	13.1279	13.413	13.7067	13.6105	13.5547	13.6776	13.6798	13.2935	13.4922	13.5563
ATP6V1C1	11.6431	11.8676	12.1839	11.9932	11.4057	11.6048	11.1546	11.3856	11.9346	12.0825	11.8398	11.9919	11.6754	11.7907	11.3616	11.6666	12.0127	11.7947	11.6717	11.7765	12.1381	12.2111	12.2519	12.1448	12.2493	12.3529	12.0763	12.1018	12.1076	12.2132
ATP6V1C2	10.2759	9.96318	10.7083	10.09	10.0785	9.37779	9.89251	9.7426	10.1719	10.5052	10.0315	11.0147	9.11284	10.7872	9.01867	9.95568	10.365	9.47834	8.45531	10.5946	9.93191	11.3175	11.1383	11.1719	11.221	11.4939	10.7732	11.0791	10.8618	11.2021
ATP6V1D	11.2232	11.7066	11.9778	11.2515	11.1223	11.5237	10.3314	11.0034	11.3718	11.7365	11.0867	11.6732	11.3606	10.9997	11.1658	10.9277	11.9312	11.9769	11.3789	11.3928	12.3866	11.9	11.8804	11.908	11.6753	12.0065	11.9143	11.5365	11.5622	12.0214
ATP6V1E1	11.8433	12.1961	12.3408	11.9764	11.5895	12.6461	11.1972	11.8592	12.2536	12.2219	11.9492	12.0869	12.1159	12.0867	11.703	11.9605	12.6541	12.3489	12.0226	12.1341	12.5976	12.1853	12.3466	12.3622	12.2686	12.32	12.1939	12.2248	12.3053	12.3466
ATP6V1E2	7.09986	7.19215	7.46576	6.84222	7.1013	7.28902	6.82451	7.39317	7.12194	7.52353	6.98091	7.33821	7.4448	7.01424	7.46721	7.28301	8.25849	7.42048	7.22652	7.50082	7.61251	7.54511	7.37856	7.57654	7.18445	7.31305	7.56716	7.51505	7.60499	7.39886
ATP6V1F	11.7649	11.8441	11.745	11.5821	11.8643	12.9264	11.2933	12.2591	12.0538	11.7687	11.5478	11.6034	11.9934	11.5779	11.5499	11.5211	12.3923	12.4021	11.602	12.0611	13.3378	11.4605	11.5326	11.6913	11.8807	11.8268	11.8556	11.909	11.8703	11.8241
ATP6V1G1	11.0054	11.2586	11.1849	11.01	10.9914	12.0434	11.0133	11.5547	11.5401	11.2367	10.9583	11.0501	11.679	10.9453	11.0472	11.1022	11.7795	11.8726	11.2435	11.2686	12.3855	11.0611	11.1824	11.1939	11.1491	11.1658	11.1233	10.9728	11.0555	11.2134
ATP6V1G3	7.20161	6.72527	7.74733	7.37551	6.21231	6.80688	5.83936	6.72224	7.39723	7.59495	6.60282	7.46824	5.16094	7.43112	5.28446	6.42447	8.23199	7.21223	3.98516	7.39786	7.20436	8.33869	8.40259	8.16559	8.56369	8.66439	8.22037	8.00358	7.97077	8.73779
ATP6V1H	11.0702	11.1915	11.5893	11.2897	10.8025	11.2297	10.698	10.7581	11.3754	11.4634	11.3026	11.508	11.1194	11.3719	11.0538	11.0666	11.6988	11.0872	11.1369	11.3198	11.2671	11.8343	11.8472	11.9251	11.8377	11.8735	11.7425	11.5967	11.741	11.6857
ATP7A	10.757	10.5704	10.8786	10.7002	10.6704	10.5297	10.7321	10.5328	10.7427	11.0054	10.914	10.808	10.6937	10.8354	10.5881	10.8962	10.7987	10.8951	10.5475	10.7226	10.8778	11.0058	11.0559	11.0247	10.9816	11.0987	10.9037	11.0188	10.8835	10.8809
ATP7B	10.9104	11.2494	11.1861	10.914	10.792	10.8917	11.006	10.7789	10.8963	10.9478	11.0991	11.3677	11.0296	10.8589	10.5607	10.7141	11.3437	10.6274	10.649	11.1169	11.5401	11.2097	11.4208	11.313	11.2094	11.3907	11.2155	11.1647	11.3572	11.1015
ATP8A1	10.7955	10.2819	10.6048	10.6689	10.954	10.1424	11.0944	11.0414	10.8652	10.5716	11.0179	10.7387	11.0882	10.9838	11.0295	11.1477	10.6709	11.1246	10.634	10.6287	10.6074	10.8055	10.9456	10.7443	10.6201	10.969	10.5421	10.9573	10.9793	10.7536
ATP8A2	6.53869	7.45847	6.87825	7.77703	7.25365	7.30047	6.05434	6.87365	7.76828	7.18653	6.47438	7.10806	8.10879	7.2322	6.85995	7.85504	7.61172	7.81225	6.52127	6.77257	7.62193	8.23411	7.52378	7.28188	9.13428	6.33931	7.2699	6.42882	6.33309	6.46922
ATP8B1	11.5562	11.1594	11.0532	11.3433	11.5134	11.2155	11.6156	11.3625	11.4927	11.4726	11.5118	11.1856	11.1534	11.4587	11.4605	11.5783	11.2607	11.4816	11.4577	11.0192	11.007	11.4044	11.2012	10.7242	11.0332	10.8117	11.1113	10.8259	11.1906	10.7185
ATP8B2	12.005	11.8944	11.4366	12.2343	12.6844	11.9532	12.7487	12.9458	12.3221	11.6595	11.9225	11.4844	12.5174	12.2964	12.4231	12.604	10.873	12.7886	11.999	11.8251	11.8963	10.7539	10.464	11.1235	10.5433	10.4231	10.5012	10.9042	10.6659	10.9286
ATP8B3	5.86268	6.57937	6.02834	6.36895	6.97604	6.07932	7.38853	6.94054	6.80175	6.18391	6.81059	5.66398	6.20346	6.85643	7.02322	7.20007	5.44306	5.45828	6.61934	5.94423	5.94966	5.37231	5.87065	6.13536	5.39328	6.15015	5.79529	6.21393	6.20094	5.49529
ATP8B4	9.87781	9.78052	9.83777	9.81795	9.81764	9.94081	10.0238	10.3308	10.1979	9.81533	9.67861	9.79195	9.92574	9.72951	10.2757	10.2597	10.0571	10.2083	9.22367	9.75419	10.3779	9.68987	10.0049	9.92673	9.7706	9.80228	9.32744	9.395	9.72518	9.67105
ATP9A	12.576	12.5856	11.9363	12.2243	12.7346	12.6013	13.0251	12.888	12.6253	12.5437	12.6616	12.3226	12.6663	12.5273	12.8205	12.6294	11.9505	12.7246	13.0076	12.344	12.4024	12.2214	12.0694	11.9681	11.9745	11.6832	11.7411	11.9802	11.8053	11.7106
ATP9B	11.4517	11.4129	11.4708	11.4866	11.4543	11.2002	11.3936	11.2543	11.3985	11.2984	11.6061	11.4601	11.3606	11.5345	11.5057	11.4685	11.3787	11.4399	11.3852	11.4498	11.2559	11.531	11.5859	11.4685	11.491	11.5264	11.4274	11.4356	11.4834	11.3143
ATPAF1	11.2516	10.9676	11.5311	11.291	10.9332	11.4889	10.574	10.926	11.2562	11.3465	11.2172	11.4472	11.0977	11.075	10.8359	10.8853	12.0416	11.3706	10.7444	11.3452	11.6771	11.5526	11.86	11.7087	11.7148	11.7103	11.6763	11.47	11.6999	11.6042
ATPAF2	9.80274	9.96584	9.98249	9.83705	9.85506	10.2014	9.80957	10.0505	9.94855	9.93391	9.82904	9.98539	9.9076	9.8998	9.78469	9.67825	10.4385	10.1077	9.79886	10.0556	10.4545	9.90514	10.0835	10.024	10.1307	10.0642	10.0315	10.0958	10.1719	9.85482
ATPIF1	11.597	11.8151	11.9865	11.6939	11.5573	12.4225	11.2504	11.6288	12.0241	11.7092	11.79	11.8038	11.9436	11.5587	11.3904	11.548	12.4825	12.0996	11.1147	11.9381	12.4618	11.9094	11.9413	12.0598	11.9895	12.0436	12.1842	11.7634	11.9834	12.0819
ATR	11.539	11.3036	11.2949	11.4505	11.4553	11.241	11.3452	11.37	11.4832	11.5322	11.5668	11.4018	11.4008	11.4169	11.5018	11.5674	11.1881	11.4443	11.6918	11.1566	11.0887	11.4895	11.5904	11.3015	11.2883	11.4413	11.3741	11.3762	11.3141	11.3367
ATRAID	11.5373	11.4244	11.4898	11.3644	11.554	12.2888	11.3598	11.832	11.787	11.4306	11.3666	11.4553	11.7525	11.2691	11.3762	11.4685	12.1964	12.1422	11.2073	11.668	12.7494	11.412	11.3662	11.3933	11.2664	11.4086	11.5173	11.3088	11.5592	11.1881
ATRIP	8.88141	9.11733	8.73103	8.81089	9.00276	8.87332	9.26155	8.98814	8.91135	8.8058	8.98734	8.8683	8.52875	9.03958	8.95414	8.87656	8.82272	8.969	9.2375	8.77534	8.72806	8.76242	8.95414	8.69177	8.74237	8.87522	8.75178	8.91227	8.68677	8.66553
ATRN	12.8821	12.6901	12.7886	12.8209	12.7555	12.7978	12.8139	12.7654	12.9142	12.8808	12.8287	12.8411	12.7487	12.7353	12.8785	12.856	12.7988	12.7293	12.8835	12.8691	12.6278	12.9198	12.9619	12.8609	12.9046	12.8961	12.8385	12.8445	12.7476	12.7143
ATRNL1	10.6524	10.1952	10.7669	10.7792	10.8799	10.4922	11.4255	10.9364	11.1927	10.2856	10.3103	10.4947	11.0781	10.7872	11.4762	11.3661	10.1009	11.5092	11.0026	10.5664	10.941	10.4616	9.70399	10.2923	9.76564	10.0973	9.49803	9.53494	10.2121	10.0519
ATRX	12.5174	12.1876	12.5428	12.6446	12.0828	11.7508	12.3154	12.2259	12.4453	12.3738	12.521	12.3637	12.3841	12.3047	12.4732	12.4089	11.9023	12.3483	12.2619	12.057	11.8138	12.8192	12.8585	12.5499	12.5037	12.5378	12.536	12.2257	12.375	12.656
ATXN1	12.3346	12.2095	12.271	12.3301	12.5354	12.1609	12.6741	12.5816	12.5107	12.245	12.291	12.3738	12.4256	12.4453	12.6027	12.6208	12.3906	12.5089	11.997	12.3473	12.2197	12.4155	12.1942	12.4604	12.2656	12.3106	12.3365	12.3448	12.2629	12.0754
ATXN10	11.5121	11.4451	11.503	11.3971	11.3916	11.6655	11.3806	11.5027	11.7339	11.5444	11.5993	11.4358	11.6607	11.3579	11.729	11.5155	11.7348	11.7146	11.8285	11.377	11.7438	11.4644	11.5574	11.4928	11.4485	11.4922	11.4421	11.2141	11.3953	11.4891
ATXN1L	12.9846	13.0604	13.0153	13.0671	12.9758	12.6489	12.6294	13.1031	13.0439	13.0388	13.0491	13.038	12.8616	12.973	12.695	13.0551	12.9741	13.0052	12.8341	13.0296	13.0652	12.9322	13.2265	13.1257	13.0905	13.1624	12.8209	13.0765	12.7476	13.1826
ATXN2	11.9386	11.9865	12.1702	12.0855	11.901	11.553	12.0378	11.6078	11.7461	11.8985	12.0404	12.0321	11.8793	12.02	11.8158	12.0272	11.814	11.6298	11.7534	11.9895	11.7963	12.1631	12.1687	12.2554	12.3008	12.1784	12.2806	12.1991	12.2164	12.1404
ATXN2L	12.9105	13.1579	12.9215	13.2306	13.2682	12.0588	13.4837	12.7304	12.5987	12.9358	13.1288	12.9273	12.7882	13.176	13.2285	13.1441	12.2083	12.2526	13.1925	13.0559	11.7846	12.8518	12.6651	12.8491	13.0647	12.9405	13.0455	13.0927	13.0093	13.1147
ATXN3	10.6016	10.381	10.5884	10.5194	10.5316	10.6249	10.8738	10.8148	10.6414	10.4598	10.6336	10.6373	10.8733	10.7179	10.6351	10.8064	10.4568	10.7859	10.6747	10.5986	10.6286	10.6417	10.5806	10.6269	10.4109	10.5732	10.4683	10.6334	10.4704	10.4782
ATXN7	11.9365	11.7754	11.951	11.9617	12.1376	11.8377	12.3643	12.1439	11.9919	11.87	12.0045	12.0054	12.2357	12.0287	12.0287	12.2921	11.9555	12.1553	11.8238	11.95	11.6672	11.9914	12.0959	12.1631	12.0976	12.0101	12.0538	12.0948	11.9363	12.2928
ATXN7L1	10.7371	10.8072	11.2184	11.1313	10.8619	10.6541	10.6231	10.744	10.6551	10.7489	10.8799	11.2403	10.7085	11.0306	10.6937	10.8968	11.2405	10.9444	10.3133	10.9885	10.7162	11.2534	11.1214	11.1658	11.1357	11.299	11.0529	10.8848	11.2292	11.006
ATXN7L2	9.42174	9.74678	9.59628	9.62867	9.70744	8.89726	9.6731	9.22148	9.0469	9.53722	9.58065	9.53805	9.26305	9.43106	9.56445	9.29494	8.93087	8.77724	9.82387	9.68672	8.37001	9.77459	9.58656	9.51237	9.86809	9.75269	9.9041	9.54094	9.77883	9.88677
ATXN7L3	11.6431	11.7762	11.4917	11.6171	11.9225	11.7197	12.2549	11.9211	11.7563	11.72	11.7775	11.6918	11.9048	11.7563	11.8408	11.8445	11.5477	11.5978	12.0166	11.739	11.4688	11.3792	11.4752	11.309	11.313	11.3715	11.2298	11.4304	11.4067	11.5282
ATXN7L3B	12.6771	12.4197	12.5092	12.4809	12.6771	12.7721	12.5987	12.5017	12.6541	12.593	12.627	12.6537	12.6372	12.4711	12.5934	12.5917	12.7964	12.8043	12.533	12.6734	12.5799	12.5425	12.592	12.4111	12.3534	12.5957	12.6105	12.4492	12.4615	12.1986
AUH	10.6737	10.6321	11.2671	10.7251	10.3484	10.903	10.2304	10.4834	10.8719	10.8122	10.786	10.9521	10.7644	10.7121	10.3289	10.4949	11.5426	10.8426	10.4995	11.1125	10.9944	11.4016	11.4915	11.6284	11.6166	11.669	11.4688	11.1486	11.2011	11.4131
AUP1	11.7056	11.9007	11.6528	11.7115	11.9236	12.4032	11.9666	12.2554	12.0611	11.7939	11.8286	11.7611	12.1928	11.7974	11.9108	11.8798	12.2182	12.2192	11.8855	11.8413	12.4131	11.5718	11.6879	11.7366	11.6366	11.5982	11.6267	11.6515	11.6775	11.6018
AURKA	7.5684	7.67614	7.77743	7.05926	7.43904	8.32601	7.96966	7.97686	7.6524	7.70471	7.14307	7.18226	7.93976	7.43112	7.54914	7.29731	7.73499	7.0957	7.7821	7.60043	8.23623	7.11946	7.71957	7.20116	7.62931	7.72084	7.43788	7.66958	7.79486	7.72856
AURKAIP1	11.5143	11.6048	11.5365	11.317	11.4433	12.3524	11.2278	11.9117	11.6885	11.5225	11.1612	11.5092	11.5723	11.2578	11.1957	10.7759	12.2278	12.0596	11.3478	11.6685	12.5457	11.3143	11.2885	11.4397	11.3543	11.4409	11.4754	11.4741	11.5961	11.4075
AURKAPS1	7.34063	8.15721	7.67337	7.51152	7.64934	8.19099	8.37462	8.55415	8.08124	7.78784	7.11928	7.93485	8.36169	7.31895	8.1628	8.25647	8.17619	8.23094	5.49652	8.11839	8.45737	8.12111	8.59754	8.38049	7.73299	8.07552	8.17196	7.27321	7.8466	8.57973
AURKB	4.93467	5.76477	4.47228	4.40819	6.50588	6.3456	6.58609	6.42105	6.50065	5.5819	5.11054	3.40693	5.31279	4.12366	6.62962	5.51828	4.63347	5.20239	6.18839	4.91161	6.45365	4.19032	4.13183	4.18578	2.66986	4.89183	4.5238	4.79176	5.23721	3.20749
AURKC	6.75624	6.83242	6.08703	5.67859	5.41845	6.5931	6.37715	5.87128	5.86623	4.90375	6.14264	5.79529	5.84363	6.7344	5.87001	6.54246	6.36622	5.24529	6.16595	6.56341	6.82635	6.66123	7.48248	7.0317	7.07413	7.16748	6.90662	6.15908	6.39196	7.62269
AUTS2	11.4496	11.4075	11.7939	11.6781	11.5819	10.5236	11.5093	11.1171	10.869	11.5265	11.5668	11.9054	10.949	11.3834	11.3904	11.1294	11.1967	10.7446	11.2889	11.5649	10.5471	12.1141	11.7096	12.249	12.0289	11.8496	12.1661	12.089	11.9709	11.886
AVEN	8.66902	8.81286	8.97284	9.07353	8.60673	9.28912	8.56758	8.982	8.76855	8.50164	8.49272	8.55374	8.97836	8.60483	8.25627	8.47606	8.95581	9.08778	8.84773	8.83625	9.82717	8.90446	9.12328	8.72858	8.99981	8.94504	9.16035	8.86177	8.95829	8.89717
AVIL	10.7052	10.4442	10.46	10.3325	10.2633	10.2855	10.7917	10.4654	10.6121	10.4598	10.4893	10.4385	10.6491	10.6065	10.396	10.5535	10.3779	9.96919	11.0355	10.7598	9.97832	10.3158	10.1462	10.0071	9.33125	10.2048	9.99776	9.88491	9.54094	9.73058
AVL9	11.7166	11.5918	11.5466	11.6465	11.689	11.8201	11.6398	11.7775	11.7048	11.6682	11.7689	11.6353	11.8104	11.5735	11.5618	11.8134	11.8057	11.7728	11.6636	11.6854	11.9648	11.5244	11.8337	11.6272	11.6202	11.617	11.7444	11.7051	11.5884	11.527
AVPI1	7.58001	8.32235	8.30621	7.9145	7.88303	8.68289	7.6388	7.91022	8.17219	7.6892	7.82412	8.19283	8.04146	7.81437	7.75082	8.07313	8.91578	8.12369	7.98481	8.25682	7.93607	7.97084	8.57679	8.43201	8.70581	8.1496	8.22722	9.19664	8.71023	9.15221
AVPR1A	8.84401	8.85695	9.38242	8.62466	8.32156	8.52214	7.69402	9.20219	9.58752	9.55025	9.11228	9.77769	7.80727	9.37291	8.02699	8.98228	9.32311	8.98915	7.65562	9.51748	9.55059	10.2233	9.63664	9.77493	9.31113	9.74466	8.80703	10.7655	9.84666	10.4345
AVPR1B	4.93467	6.77211	7.51505	5.80822	5.32409	7.47107	6.11909	6.01362	5.58404	5.36321	7.72289	5.44034	5.59529	4.95501	5.36803	6.58835	6.62346	6.53964	6.42051	7.1533	7.30941	7.00199	6.89859	6.23617	6.47564	7.13353	7.02905	6.97142	7.04745	7.42834
AVPR2	8.69584	8.61948	8.71239	9.03868	8.68974	7.77406	9.34405	8.14612	8.52294	7.85641	8.47187	8.73743	8.00938	8.39891	8.39746	8.31408	9.20821	8.30149	8.68798	8.34901	7.40252	8.81089	8.58864	8.1577	7.91673	8.71533	9.20234	8.08329	9.15872	8.59026
AXDND1	6.51257	6.21811	5.65552	6.48449	5.59888	5.96115	6.11909	5.77059	6.26013	6.88857	6.50065	6.73605	5.88505	5.96034	6.24514	4.81022	6.49416	6.6058	5.26807	6.29519	6.54246	7.26938	7.04494	6.40115	7.01687	7.61921	7.54418	6.79353	7.15133	6.49416
AXIN1	10.7234	10.9646	10.6177	10.6883	11.0161	10.5666	11.329	10.9486	10.59	10.7233	10.7398	10.5382	10.6703	10.725	10.8706	10.7067	10.3072	10.507	11.0903	10.7636	10.2183	10.4256	10.4973	10.4864	10.6856	10.5204	10.606	10.7715	10.646	10.7384
AXIN2	9.87781	9.96584	9.20304	9.8406	10.267	9.64312	10.5388	10.1515	9.84216	9.5677	9.9025	9.35338	10.0281	9.82238	10.5807	10.0613	8.78106	9.94129	10.542	9.47775	8.85404	8.89095	8.69831	8.93403	9.01169	8.67772	8.38695	9.18618	8.59119	8.99386
AXL	11.7534	12.0342	11.2955	11.6869	12.2144	11.6613	12.4311	12.2648	11.6488	11.4666	11.5181	11.0545	11.7142	12.0581	12.5017	12.1725	10.5749	11.6899	11.9651	11.3627	10.7979	10.6417	10.4228	11.2596	11.0933	10.5285	10.6707	10.9678	11.0977	11.5797
AZGP1	12.8366	12.7487	14.0776	12.9708	12.3778	13.4659	10.5492	11.6964	11.9829	12.7646	12.8657	13.793	12.9625	13.0418	12.3329	12.0731	14.4839	13.6086	11.6347	13.4353	14.1646	13.7205	13.979	14.1434	13.805	13.7048	13.9211	13.5594	13.5768	13.7724
AZGP1P1	6.27031	6.98822	7.80825	7.00288	6.47514	7.27692	4.9903	4.37316	5.62401	6.57662	7.02386	7.77639	6.16063	6.84272	4.78595	5.31279	8.23638	7.06454	4.91292	7.19813	8.43226	7.79048	7.83823	7.92279	7.75574	7.35769	7.36452	7.63701	7.16978	7.45875
AZI2	10.1422	10.2095	10.5413	10.3668	10.0409	10.1284	10.2469	10.0982	10.2467	10.3036	10.2457	10.4276	10.1668	10.1703	10.1164	10.2233	10.3861	10.1638	10.2938	10.0217	10.3898	10.3534	10.4369	10.4385	10.3618	10.4504	10.5012	10.0902	10.3117	10.5586
AZIN1	11.6317	11.3745	11.3858	11.7256	11.5272	11.498	11.2805	11.7269	11.629	11.7049	11.8509	11.7158	11.5761	11.5475	11.7358	11.7474	11.5137	11.7963	11.8659	11.3407	11.4362	11.5922	11.6425	11.5339	11.4532	11.6136	11.4842	11.6951	11.6381	11.9754
AZIN1-AS1	7.71781	7.7096	7.82623	7.82046	7.7188	8.12045	7.32915	7.53391	7.88979	7.51346	7.58904	8.02662	7.45365	6.99365	7.0667	7.70656	8.00486	7.56602	7.87102	7.45701	7.928	7.91673	7.94971	7.68057	7.83631	7.30127	7.46637	7.63701	7.80525	7.45875
AZIN2	8.84401	9.22055	8.99302	8.87982	8.84373	8.78195	8.91286	8.96331	8.75329	8.79654	8.93824	8.98364	9.08548	9.17054	9.41595	8.81841	9.22828	8.67906	8.79538	8.98942	8.88213	8.87554	8.98216	8.81943	9.05016	9.14804	8.90493	8.96435	9.04758	8.73779
B2M	15.008	14.924	14.4456	15.0552	15.2659	15.506	15.4908	15.8575	15.8259	15.0919	15.0795	14.4358	15.6489	15.1403	15.3489	15.506	14.454	15.5915	14.7629	14.6178	15.7322	14.494	14.2659	14.0884	14.3177	14.1766	14.1365	14.387	13.918	14.1684
B3GALNT1	10.2144	10.148	10.388	10.4247	10.2085	10.4393	9.84722	10.1113	10.2183	10.1755	10.486	10.6185	10.4424	10.0157	10.3685	10.2185	10.6886	10.1908	9.98439	9.96153	9.99295	10.5058	10.6581	10.3659	10.3924	10.7133	10.6694	10.2274	10.3469	10.197
B3GALNT2	10.4238	10.133	10.2728	10.1955	10.2649	10.2462	10.5331	10.5905	10.1364	10.1675	10.2857	10.0935	10.19	10.2888	10.4282	10.3881	10.3004	10.2342	10.3882	10.5244	10.2813	10.1851	10.163	10.1742	10.3389	10.2597	10.0008	10.373	10.2272	10.3323
B3GALT2	7.32572	7.08938	7.71347	7.87623	7.40811	7.10535	7.56776	7.42563	7.33979	7.56467	7.94902	7.51346	7.22618	7.2813	7.41947	7.51081	7.22652	7.37965	7.66311	7.27141	7.09816	8.59637	8.3149	8.2349	8.30782	8.12445	8.25667	7.92116	7.86136	8.36089
B3GALT5	6.73654	7.17103	6.38217	6.36895	8.00887	6.57714	7.53114	6.79412	7.37375	6.33375	7.21656	5.40296	7.71751	5.85281	7.77334	7.48329	5.36274	7.26771	6.60029	6.77257	6.25089	5.15699	5.73197	4.3641	5.9195	4.67496	5.75129	4.60565	4.65953	4.37017
B3GALT6	10.4105	10.4827	10.1106	10.1644	10.4638	10.8194	10.397	10.5183	10.32	10.1942	10.0164	10.0072	10.2209	10.2247	10.2545	10.0613	10.1324	10.3347	10.4282	10.2647	10.3718	9.80422	9.39795	9.88783	9.82238	9.82645	9.9943	10.2155	10.0228	9.99106
B3GAT1	8.88877	8.83843	9.66827	9.45654	8.67949	8.5603	8.49248	8.71169	7.96846	8.57713	7.4333	10.0403	9.22176	8.80477	8.24611	7.72329	9.32611	8.08987	8.71706	8.72259	7.45515	8.48727	8.66717	8.69831	9.27165	9.33415	8.71877	9.37084	9.27751	8.39657
B3GAT3	10.6247	10.7502	10.4648	10.5153	10.8691	11.065	10.577	10.785	10.7058	10.67	10.5257	10.3913	10.5584	10.4613	10.6531	10.4838	10.635	10.736	10.8144	10.6081	10.6319	10.3053	10.1523	10.0136	10.2977	10.1764	10.1611	10.4952	10.3309	10.209
B3GLCT	9.37175	8.99559	9.29562	9.08849	9.21492	9.18911	8.96668	8.81943	9.07624	9.2722	9.04991	9.27033	8.99669	8.96121	9.12305	8.96602	9.44115	9.1411	9.13963	9.24919	8.97165	9.5434	9.68525	9.6315	9.44718	9.46829	9.36462	9.51425	9.56505	9.52984
B3GNT2	10.3604	10.2844	10.4809	10.2651	10.2694	10.8109	10.4019	10.5589	10.6012	10.6454	10.5509	10.7218	10.5156	10.5282	10.2206	10.5181	10.8434	10.4808	10.2426	10.4389	10.4545	10.5745	10.6803	10.9064	10.9253	10.8101	10.6628	10.4412	10.4465	11.1072
B3GNT3	8.35875	8.06931	8.15144	8.07257	8.67949	8.04398	8.81331	7.30627	7.58498	8.89119	7.83485	7.91059	8.52114	7.8019	8.42839	8.50439	9.24919	7.42892	9.34019	9.20057	7.46721	7.73114	8.12965	6.55087	7.70687	8.27871	8.68529	8.58947	9.13471	7.54489
B3GNT4	7.71781	8.74358	8.64526	7.92045	7.91479	8.10258	7.43671	7.68142	7.99662	8.34554	7.58904	8.28209	7.59539	8.26363	7.2796	7.10746	8.93087	7.48012	7.39944	8.47526	8.44281	8.35381	8.7168	8.35831	8.29203	8.88803	8.29817	9.09729	9.0797	8.82245
B3GNT5	8.20102	8.75178	8.32212	8.05923	8.55534	8.74237	8.47107	8.5683	8.36687	8.56964	8.46422	8.46581	8.75085	8.52808	8.48797	8.73227	8.44527	8.30651	9.0222	8.57287	9.00958	8.20553	8.48447	8.70466	8.69893	8.30961	8.44999	9.06006	8.33901	9.83957
B3GNT7	7.71781	8.39782	7.92045	8.03701	8.08783	8.33869	8.14807	8.17582	8.12341	8.51599	7.97192	7.94821	8.02736	8.25868	8.28726	7.81208	7.59759	7.66905	8.67455	7.91479	6.94776	8.05236	7.45005	8.03609	7.80483	7.75536	7.69796	8.36762	8.19737	8.00887
B3GNT8	8.51564	8.39158	8.51802	8.3343	8.34367	8.08961	8.62321	8.09221	8.23638	8.53255	8.37881	8.50878	7.65767	8.34577	8.38563	8.19025	8.41515	8.09629	8.12179	8.34901	7.52745	8.24132	8.00887	7.84579	7.89401	8.04081	7.88548	8.04974	8.04865	7.59064
B3GNT9	9.86164	10.0635	9.9782	9.97488	10.2773	9.76564	10.0749	10.091	10.1839	9.71567	9.78294	10.0275	9.98965	10.2761	9.95049	9.8738	9.4478	9.84637	9.79273	10.1768	9.53986	9.76628	9.37648	9.55511	9.4076	9.36401	9.30817	9.71817	9.53001	9.41523
B3GNTL1	8.84401	8.89259	8.21661	8.78236	8.88966	8.60269	8.93374	8.54414	8.50539	8.5197	8.62087	8.60641	8.40516	8.99397	8.88633	8.53749	8.01582	8.32119	8.83932	8.59737	8.0174	8.14589	8.11558	8.38049	8.13743	8.40316	8.08756	8.30961	8.35262	7.92768
B4GALNT1	5.51056	5.52265	6.08703	5.8428	5.41845	5.50163	6.34989	6.06767	5.86623	6.23617	6.05642	5.50878	5.02808	6.14911	6.34809	5.10005	5.15594	5.74055	6.766	5.76304	4.24059	5.03667	5.57622	5.54957	5.01296	5.35747	5.5699	5.57356	5.47816	5.79529
B4GALNT2	8.5731	7.51267	8.53054	7.57724	7.86036	8.22485	9.82096	8.21466	8.50925	8.96799	8.62786	7.82692	8.50126	7.71223	8.70312	8.25096	8.75737	7.66905	8.6139	8.70696	6.15057	8.72449	8.83151	7.21601	8.33304	8.75143	8.81425	7.94142	8.25607	7.67462
B4GALNT3	10.145	9.56073	10.2482	9.81587	9.48101	9.20568	10.1164	9.26397	9.5463	10.099	9.9934	10.4514	8.86046	9.47736	9.52933	9.73031	9.9965	9.20713	9.70163	9.84296	8.39407	10.5415	10.5824	10.854	10.8283	10.8917	10.2462	10.9852	10.8858	10.8601
B4GALNT4	3.48504	5.48205	4.04878	4.90646	5.67439	6.00863	7.67506	6.79412	5.41845	4.24059	4.78595	5.66398	4.18578	5.15699	6.54787	5.36274	3.96924	5.32814	6.10986	4.72613	6.17606	4.4255	5.02712	5.17452	5.44522	4.67496	4.08979	6.31187	5.16813	6.46922
B4GALT1	12.8731	13.3595	12.7289	12.9215	13.4114	12.8585	13.2041	13.0296	13.3498	13.3187	13.1468	12.7278	12.9741	12.7113	13.177	13.1288	12.486	12.8888	13.4066	12.8021	12.3536	12.6521	12.7098	12.8357	13.017	12.7646	12.6925	12.8649	12.9507	13.1415
B4GALT1-AS1	4.93467	4.59739	5.45392	4.67932	5.00902	6.51005	5.91654	5.95507	5.82734	5.32016	4.35131	5.05484	5.40533	4.61725	4.98946	5.15412	6.51152	6.01628	4.7429	5.03751	7.40252	6.16141	6.17298	5.60407	5.44522	5.6916	5.75129	5.2715	4.76395	5.88469
B4GALT2	10.405	10.5492	10.0401	10.0774	10.37	11.0238	10.258	10.6144	10.3502	10.4752	10.0263	10.1057	10.244	9.88086	10.27	9.81879	10.5074	10.3861	10.7431	10.2983	10.8739	9.92074	9.91376	9.95663	10.1097	10.0036	9.82941	10.2194	10.2352	10.197
B4GALT3	10.6903	10.8315	10.7332	10.909	10.9722	11.1344	11.1503	11.2829	11.0044	10.9736	10.8302	10.717	11.21	10.9601	11.0624	10.931	11.2343	11.0143	11.0497	10.9959	11.4014	10.5233	10.7684	10.7815	10.8283	10.7752	10.5677	10.8101	10.7284	10.9348
B4GALT4	10.0464	10.2879	10.6415	10.3101	9.98309	10.421	9.7328	9.86724	10.2507	10.0788	10.1791	10.4719	10.4116	10.2713	9.98036	10.0566	10.7384	10.3514	9.70299	10.3772	10.4438	10.6851	10.8736	10.6743	10.6407	10.6193	10.598	10.1979	10.4503	10.5586
B4GALT4-AS1	3.77164	5.36274	5.28367	5.67859	5.18618	5.81846	5.37697	5.16697	4.24879	4.90375	5.05347	5.69488	4.5403	5.44898	4.65217	5.45154	6.60356	5.32814	4.52806	4.84724	7.22186	6.10507	6.25036	5.98339	5.14699	5.8761	5.88542	5.49652	5.79192	5.41845
B4GALT5	12.6814	12.8298	12.4366	12.5757	12.8706	12.9785	12.3892	12.8334	13.085	12.9997	12.9924	12.4847	12.592	12.4897	12.576	12.9289	12.4705	12.278	12.7612	12.7785	12.6442	12.1281	12.2187	12.056	12.4048	12.3483	12.3833	12.2465	12.3789	12.5943
B4GALT6	7.69325	8.138	8.2111	7.68057	8.04073	8.16258	8.00912	7.49256	8.0883	8.37636	8.09303	7.8743	7.964	8.16052	8.00099	8.03423	8.34688	7.45223	8.32745	8.09986	7.81552	8.75683	8.52063	8.61631	8.57016	8.53944	8.25667	8.13439	8.1788	9.12823
B4GALT7	10.2114	10.3622	10.2993	10.3101	10.3649	10.513	10.3298	10.3924	10.201	10.2961	10.0488	10.0181	10.0624	10.2842	10.2193	9.91873	10.3803	10.2232	10.1916	10.262	10.6308	9.9076	9.83672	9.95249	9.95648	9.97916	9.94255	10.0061	10.0733	9.83705
B4GAT1	10.4822	10.6274	11.1396	10.7614	10.4766	10.9247	10.0238	10.4551	10.8392	10.8459	10.6806	11.1678	10.5651	10.7624	10.1676	9.91873	11.6376	10.8484	10.1879	10.9044	11.3496	11.2841	11.2577	11.2326	11.139	11.3036	11.1422	11.2735	11.2568	10.9857
B9D1	10.0215	10.1695	10.0605	10.1625	10.2056	10.1345	10.3438	10.1486	9.87354	10.1018	10.2857	10.1666	9.8481	9.91118	10.1627	10.0642	10.1658	9.87689	10.3383	10.2241	10.065	10.2146	9.9588	9.93016	10.024	10.1171	10.149	10.158	10.2078	9.9122
B9D2	7.61484	7.73114	7.60136	7.82046	7.88303	8.32601	8.00912	8.11444	7.92619	8.08056	7.80762	7.74793	7.87874	8.01958	7.93878	7.51081	8.04777	7.81225	8.17196	7.92742	7.69699	7.54511	7.66164	7.81919	7.6186	7.66829	7.66164	7.74589	7.81878	7.93774
BAALC	6.77669	6.80271	6.7626	7.10565	6.24036	6.51005	7.32915	6.62471	7.0223	6.88857	6.84317	6.27823	5.88505	6.55017	6.3725	6.77809	7.49858	6.99996	7.12004	6.96229	7.22186	7.24802	6.86719	7.31037	7.37096	7.28648	7.2699	7.51505	7.00777	7.3508
BABAM1	11.167	11.3572	11.1171	11.0244	11.4417	11.9752	11.4044	11.6668	11.5519	11.2847	11.1905	11.1269	11.4676	11.0893	11.2072	11.229	11.7087	11.7529	11.1808	11.3787	12.2885	11.0954	11.0806	11.0872	11.1612	11.2445	11.1685	11.1517	11.1294	10.8769
BACE1	12.1429	12.0649	12.1081	12.1069	12.2128	11.9145	12.1586	12.1842	12.0709	12.0158	12.0085	12.0968	11.9834	12.0342	12.1702	12.2597	12.0133	12.1633	12.1023	12.0148	12.1141	12.1509	12.0062	12.0638	12.0034	12.0385	12.0155	12.0008	12.0142	11.8534
BACE1-AS	6.82665	7.19215	7.31909	7.1181	6.97604	7.4188	7.45316	6.88536	7.03398	7.08527	7.09524	7.18226	6.86719	6.95652	6.57982	6.67335	7.45477	6.89141	6.96732	7.07214	7.14489	7.18537	7.25783	7.18537	7.37096	7.34347	7.07214	7.03374	7.30503	6.79635
BACE2	12.0498	11.6767	11.5277	11.5946	11.5978	11.4907	12.4201	11.6226	11.909	11.7365	11.5993	11.9033	11.5482	11.2884	11.8398	11.8686	11.4675	11.5791	12.1381	11.5929	11.619	11.7118	12.1189	11.6704	11.9839	11.7459	12.2143	12.2808	12.3074	12.0148
BACH1	11.8413	11.5367	11.557	11.6093	11.9205	11.9865	12.1619	12.1601	11.9943	11.804	11.8149	11.5553	11.9064	11.7926	11.9517	12.071	11.7306	12.0726	11.7397	11.6037	11.9958	11.7077	11.8944	11.8361	11.8227	11.699	11.6717	11.6855	11.6106	12.0291
BACH1-IT2	7.03338	6.9248	6.86211	6.48449	6.74052	7.15781	7.14958	6.64065	6.94371	6.72965	6.90599	6.34445	6.59989	7.13395	7.05104	7.13438	6.60356	6.49392	7.3229	6.75171	7.60268	6.4495	7.50254	7.26686	7.01687	7.0612	6.66298	6.79353	7.00777	7.50455
BACH2	9.60214	9.37084	8.9688	9.59477	9.80606	9.30905	9.95193	10.1947	9.5295	9.08603	9.40721	9.39487	10.3694	9.7569	9.56445	9.75657	9.23389	10.4396	9.56844	9.24123	8.8379	9.32136	9.21375	8.95216	9.5531	9.2088	8.85619	9.29383	8.94567	9.45715
BAD	10.3395	10.522	10.4169	10.4089	10.6776	11.3664	10.5114	11.1067	10.7833	10.611	10.236	10.4984	10.7688	10.2727	10.2128	10.0071	11.2035	10.8076	10.4058	10.6038	11.6951	10.3488	10.2029	10.3432	10.4247	10.4453	10.3683	10.4389	10.4754	10.1955
BAG1	11.5398	11.4098	11.5023	11.1334	11.2327	12.0588	11.8404	11.5985	11.6448	11.4882	11.2243	11.3659	11.4507	11.2402	11.1658	11.3725	12.046	11.8877	11.7283	11.5599	12.2197	11.3552	11.6549	11.4164	11.5926	11.4864	11.5439	11.6408	11.6272	11.5201
BAG2	8.38079	8.29024	8.25807	7.95866	8.1496	8.47342	8.03396	8.15285	8.35623	7.94918	7.89157	8.16617	8.67385	7.87687	8.38563	7.88385	8.50795	8.53349	8.63895	8.35594	8.4821	8.03423	8.1689	8.25745	7.91673	8.00467	8.45889	8.00358	8.29768	8.4179
BAG3	11.3177	11.7708	11.7967	11.7162	11.1209	11.3487	10.7022	10.6937	11.0479	11.8206	11.4493	12.2042	11.3903	11.6332	10.9826	11.0723	11.9115	11.0633	11.717	11.8711	11.1946	11.68	11.9135	12.195	11.8526	12.0088	11.8927	12.5383	12.4066	12.0991
BAG4	10.145	10.0635	10.2728	10.0922	9.99466	9.963	10.2521	9.79842	10.0592	10.1816	10.1881	10.2035	10.0431	10.1009	10.1388	10.1897	10.3994	9.97727	10.1172	10.1985	10.0085	10.3534	10.3775	10.4952	10.6475	10.4983	10.4205	10.4138	10.3469	10.2342
BAG5	11.2562	11.2504	10.9686	10.9673	11.1251	11.4004	11.3673	11.1543	11.3012	11.4462	11.221	10.9874	11.1514	10.9389	11.3352	11.3436	10.8589	11.1204	11.8956	11.1125	10.7145	10.9427	11.0061	10.8015	10.9682	10.9829	10.8714	10.9796	10.9587	11.0921
BAHCC1	11.9348	11.9495	11.8694	12.247	12.2232	10.0755	12.4566	11.7775	11.4067	11.8637	12.0983	12.0461	10.6957	12.2058	12.3304	11.9099	10.5276	10.9121	11.948	11.9914	10.4148	12.0436	11.672	11.888	12.1506	12.007	12.0588	12.2511	12.0023	11.9311
BAHD1	11.3273	11.5675	11.4796	11.3846	11.5167	11.0192	11.642	11.2679	11.2103	11.4446	11.5055	11.7018	11.3535	11.5439	11.3928	11.4308	11.3986	11.0015	11.5627	11.6347	10.8226	11.4478	11.4289	11.5352	11.4648	11.4366	11.431	11.7689	11.508	11.6763
BAIAP2	11.2065	11.6337	12.0057	11.6823	10.8607	10.7708	10.7484	10.5785	10.5052	11.2377	11.1502	12.2015	10.7423	11.619	10.7928	10.8492	11.6555	11.0002	10.5432	11.2951	10.6491	12.0282	12.0486	12.421	11.9025	11.8006	11.8081	12.7872	12.0869	12.7542
BAIAP2-AS1	10.7052	10.7807	10.4588	10.7902	10.9533	10.7013	11.0392	10.8722	10.885	10.8975	10.8439	10.7502	10.5473	10.5034	10.9343	10.7018	10.6569	10.3704	10.7907	10.7729	10.1335	10.4758	10.4155	10.3212	10.3991	10.5241	10.5012	10.7759	10.6114	10.3567
BAIAP2L1	10.3544	10.3781	10.1951	10.2048	10.4241	10.2014	10.7118	10.2637	10.4187	10.3235	10.4512	10.3732	9.91282	10.1265	10.5006	10.5811	10.001	9.60614	11.0278	10.4272	9.8304	10.3728	10.2101	9.94578	10.3374	10.224	10.1044	10.5495	10.236	10.431
BAIAP2L2	10.6384	11.2537	12.1371	11.4796	10.6425	11.1019	9.67613	10.1153	10.1158	11.5834	11.3043	11.6389	10.9157	11.3173	9.92168	10.6807	11.4442	10.5336	9.95249	11.3063	10.8345	11.6949	11.3277	11.8798	11.9958	12.0073	12.2313	11.8816	11.99	11.6496
BAIAP3	10.018	10.2991	10.4892	10.51	10.1797	9.21236	10.5586	9.60632	9.49553	9.9934	10.3678	10.6144	9.38409	10.5605	9.95973	10.0034	9.94105	8.98256	9.77042	10.5493	8.72103	10.6514	10.734	10.8403	10.8324	10.8175	10.3995	11.0896	10.8765	10.5457
BAK1	9.73849	10.1603	9.73193	9.96095	10.0072	10.356	10.3027	10.1302	10.174	10.0322	9.75951	9.70988	9.92233	9.78033	9.94377	9.75657	9.96051	9.80104	10.3452	9.88917	9.96051	9.3502	9.47834	9.22631	9.50381	9.35623	9.4151	9.70858	9.7849	9.5919
BAMBI	10.0001	9.87456	9.94143	9.6589	9.9579	10.2184	9.57085	9.96337	10.0108	9.95639	9.98293	9.80046	9.64327	9.41422	9.81879	9.92869	10.183	10.2688	9.72912	9.87781	10.3368	9.84592	9.96487	9.50643	9.53395	9.66924	9.94604	9.54094	9.98612	10.2889
BANF1	10.6762	10.734	10.4345	10.4865	11.0399	11.7706	10.5804	11.5096	11.0497	10.8817	10.7067	10.5262	11.0431	10.6184	10.8522	10.6769	11.2427	11.4927	11.1121	10.7793	11.9046	10.3338	10.3003	10.3744	10.4868	10.3679	10.5227	10.422	10.6114	10.3655
BANK1	9.45376	8.69177	8.14533	9.2696	8.86013	7.96895	8.31664	9.16654	8.6215	7.90096	8.85815	8.30812	9.87543	8.94526	8.52272	8.80436	8.23638	10.174	7.92768	7.95145	7.80483	7.69112	7.92742	7.64832	8.07508	7.88303	8.17196	7.84511	7.90293	8.80477
BANP	10.2935	10.2713	10.3834	10.3069	10.4217	10.3453	10.687	10.7033	10.3701	10.2209	10.3019	10.4012	10.6249	10.3368	10.2843	10.1173	10.466	10.4261	10.2387	10.5339	10.2331	10.3379	10.2152	10.336	10.1731	10.2616	10.3188	10.1362	10.3215	10.0752
BAP1	12.4043	12.5354	12.3826	12.4054	12.419	12.4431	12.5454	12.4165	12.399	12.3873	12.3103	12.3818	12.223	12.3232	12.3657	12.2076	12.5596	12.3085	12.3651	12.4048	12.3024	12.2073	12.285	12.2479	12.285	12.2463	12.2178	12.3807	12.2137	12.2556
BARD1	8.14567	7.73114	8.23266	7.54632	8.82041	8.52915	8.45776	8.85735	8.94586	8.30169	8.25287	8.02162	8.3761	8.27531	8.71857	8.90272	8.0226	8.73848	8.35287	7.80504	8.46273	8.06525	8.52063	8.2349	8.08201	7.79732	8.03335	7.77131	8.6171	8.20672
BARX2	7.22597	7.56873	6.89417	7.54632	6.91509	8.41562	6.05434	7.23796	8.15097	8.19584	7.98766	7.95757	6.95883	7.34808	6.15015	7.47065	8.33751	7.70727	7.08231	8.14612	7.58438	7.76147	7.91756	8.11506	8.38396	8.01166	8.39262	7.89554	8.35262	8.43269
BASP1	8.82197	8.95501	8.76453	9.31926	9.74523	9.39743	9.85524	9.89441	9.50727	8.63031	8.65803	8.33239	9.49306	9.22842	9.93467	9.42484	8.08783	9.51507	9.47467	8.46214	8.6015	7.48261	7.50254	8.29768	7.59869	7.9195	7.82124	7.97686	8.55545	8.00887
BASP1P1	9.64776	9.62398	9.85749	9.13017	10.4918	9.31602	9.91007	6.47914	7.06983	9.46677	10.4927	7.6477	9.94359	9.12719	7.64903	10.3031	4.14485	10.0758	8.26412	8.49385	9.54709	9.4919	7.6892	4.98441	7.32362	2.70815	9.11916	9.47615	7.90293	8.72412
BATF	6.02553	6.14115	4.47228	5.97548	6.85026	7.24381	6.90853	7.2686	6.12818	5.79192	5.8754	4.60763	7.09212	6.70761	6.27488	6.33083	3.96924	7.45223	6.31439	5.44643	4.95662	4.65824	3.92956	3.30138	4.48404	0.436158	3.904	4.66297	3.61254	3.95713
BATF2	8.3879	9.17686	9.02915	8.79051	9.19947	9.11284	8.9189	9.13143	8.79226	8.98984	8.67129	8.97915	8.7091	8.97284	8.85215	8.72391	8.99222	8.90003	8.81023	9.25153	9.31149	8.59276	8.80273	8.78259	8.65169	8.80495	8.84022	8.88294	9.12475	8.38813
BATF3	6.47806	6.78629	6.11284	6.5803	7.13598	7.66453	7.13218	7.99488	7.10776	6.02603	5.98414	6.22516	7.25365	6.47893	7.32656	6.89641	5.99432	7.42048	6.73498	6.08876	7.63928	5.28535	5.45624	5.54957	6.03292	5.60959	4.7421	6.03765	5.41921	5.84043
BAX	10.7431	11.2607	10.4301	10.5463	11.0439	11.4829	10.6581	11.2941	11.0268	10.8975	10.717	10.2916	11.1043	10.4438	10.7185	10.7759	10.7716	11.1065	11.0241	10.6462	11.9461	10.1302	10.1807	9.88783	10.3449	10.1597	10.171	10.2759	10.3117	10.0791
BAZ1A	10.6448	10.5492	10.1951	10.4345	10.4871	10.3086	10.9376	10.749	10.6121	10.4311	10.4964	10.1689	10.9149	10.5749	10.8522	10.8039	9.68875	10.3601	11.1687	10.1478	9.58263	9.98378	10.3326	10.1536	10.4009	9.95309	10.1144	10.3266	10.0816	10.7689
BAZ1B	12.5999	12.49	12.32	12.441	12.4746	12.3343	12.6783	12.7443	12.5859	12.3135	12.5282	12.4542	12.7353	12.5056	12.6741	12.6453	12.2394	12.6635	12.6541	12.4484	12.2135	12.257	12.3829	12.1888	12.1241	12.1541	12.2573	12.1751	12.264	12.2241
BAZ2A	13.5621	13.5147	13.3521	13.6776	13.7126	13.0278	14.0949	13.7768	13.4797	13.5255	13.646	13.4596	13.5128	13.7013	13.7815	13.9679	13.094	13.4659	13.5912	13.5983	13.1524	13.4168	13.3781	13.4451	13.5429	13.355	13.3281	13.5668	13.3427	13.4114
BAZ2B	12.4975	12.309	12.441	12.4906	12.2097	11.9661	12.667	12.3903	12.4267	12.3121	12.6508	12.2822	12.5288	12.3908	12.668	12.6921	11.9903	12.3003	12.378	12.2819	12.005	12.4264	12.5467	12.2988	12.3356	12.3057	12.4168	12.0919	12.0948	12.1609
BBC3	8.48783	9.25377	7.85532	8.69994	9.00276	8.81174	8.4253	8.9785	8.66762	8.45776	8.70999	7.49163	8.71533	8.43523	8.67741	8.50439	7.79551	8.35644	9.07217	8.22664	8.49648	7.82794	7.74589	7.40592	8.62438	7.82046	8.08023	8.09221	7.8466	8.71917
BBIP1	8.67593	8.39782	8.80735	8.51136	8.23384	8.84905	8.26986	8.42429	8.55689	8.60237	8.43448	8.60641	8.52476	8.37623	8.25144	8.80973	8.83488	8.90003	8.46422	8.37925	9.00506	8.59996	8.88716	8.76361	8.69893	8.74099	8.63336	8.60972	8.55545	8.81005
BBOF1	9.02792	8.70784	9.45319	8.87982	8.35961	8.6215	8.60854	8.57287	8.63043	8.87424	9.14307	9.50643	8.69827	8.86767	9.03943	8.79461	9.27493	8.67343	9.13143	8.86243	9.0506	9.94105	10.0864	9.79425	9.65188	9.94058	9.53688	9.6695	9.5558	9.77002
BBOX1	12.6814	13.2804	13.657	13.1807	12.6722	13.913	11.9299	12.9591	13.4659	13.1374	13.09	13.8091	13.4994	13.1354	12.6567	13.0179	14.3309	13.5472	11.7038	13.3085	13.6583	13.6121	13.7023	13.5492	13.6583	13.7787	13.6105	13.0289	13.305	13.393
BBOX1-AS1	7.79048	7.99059	8.39951	7.64792	7.97515	8.3093	7.06087	7.62819	8.14008	8.09264	7.55469	8.48196	8.44893	8.0164	7.20116	7.95568	8.65864	7.80467	6.73498	8.36222	8.56125	7.89612	8.3149	8.81222	8.0597	8.15917	8.03335	8.03335	7.90293	7.84325
BBS1	12.1538	12.257	12.3581	12.3783	12.1811	11.862	12.1948	11.7126	12.017	12.3283	12.3455	12.3846	12.0717	12.1819	12.1033	12.0373	12.4045	11.7455	12.3921	12.4018	11.7016	12.3738	12.3165	12.3536	12.5332	12.5315	12.5562	12.4313	12.5004	12.1687
BBS10	8.99507	9.02062	9.51196	9.43403	8.90816	8.90519	8.64824	8.78142	9.12237	9.2818	9.15101	9.31136	8.73388	9.08151	9.05706	9.0469	9.39444	9.16672	8.7596	8.78673	8.83355	9.71282	9.58656	9.46767	9.14393	9.53494	9.62867	9.37648	9.50295	9.37291
BBS12	9.44246	9.22734	9.38874	9.36888	9.1031	9.27379	8.87858	9.23821	9.4309	9.55025	9.61579	9.48649	9.46233	9.37976	9.04969	9.09492	9.90514	9.49386	9.2375	9.39795	9.83695	10.0628	10.2168	10.1644	10.2348	10.2026	9.98612	9.62104	9.46173	9.50931
BBS2	11.4417	11.3572	11.7267	11.5371	11.2492	11.4264	11.2256	10.9245	11.4893	11.4138	11.647	11.4485	11.4718	11.3709	11.3431	11.3872	11.6537	11.4469	11.3254	11.4922	10.9778	11.8857	11.9865	11.8095	11.5731	11.5732	11.7941	11.3437	11.769	11.5763
BBS4	10.3345	10.1881	10.4537	10.2568	10.2806	10.3845	10.4048	10.0326	10.5442	10.3003	10.5257	10.3913	10.3539	10.2455	10.4293	10.5772	10.5296	10.292	10.2369	10.3411	10.564	10.5914	10.5703	10.4297	10.4845	10.4983	10.5444	10.254	10.3697	10.042
BBS5	9.56748	9.41808	9.5758	9.61195	9.51702	9.44511	9.42626	9.34594	9.48957	9.69482	9.38101	9.59843	9.2797	9.32162	9.4295	9.13913	9.51632	9.26294	9.72318	9.61594	9.2059	9.84282	9.31018	9.51672	9.73609	9.75823	9.67069	9.46859	9.7876	9.41045
BBS7	9.00974	9.04991	9.10973	9.1014	8.92571	8.98637	8.8832	8.84986	9.01906	9.26643	9.1573	9.01724	9.26702	9.16654	9.13093	8.96602	9.1315	8.94029	9.46677	8.94492	9.11606	9.24011	9.31417	9.30624	8.9942	9.26803	9.25737	9.14712	8.95341	9.30174
BBS9	10.9056	10.6589	10.8031	10.9714	10.8691	10.7606	10.9458	10.7823	10.9993	10.8316	11.1152	10.9591	10.9007	10.8892	10.8807	11.1573	11.0541	11.0349	10.6091	10.9724	11.0833	11.0782	11.222	11.0247	10.8589	11.0067	10.9772	11.0096	10.9761	10.8611
BBX	12.4087	12.432	12.4216	12.5045	12.4479	12.436	12.3359	12.4743	12.5421	12.5072	12.5706	12.5444	12.6404	12.3942	12.486	12.6327	12.5324	12.6453	12.3884	12.4244	12.4832	12.6358	12.5993	12.5868	12.5126	12.5225	12.4853	12.551	12.4273	12.4332
BCAM	14.5897	14.5782	14.3636	14.4993	14.4751	14.2338	14.8299	14.1615	14.2617	15.3018	15.0919	14.6749	14.0434	14.387	14.9892	14.1208	14.0198	13.6121	15.7322	14.4247	13.1397	14.6457	14.1615	14.4456	14.5167	14.3563	14.6539	14.8515	14.7091	14.4643
BCAN	7.59152	7.78668	7.63928	7.17768	7.80483	7.18143	7.03527	7.22618	6.68799	6.46922	7.56776	5.90403	6.43954	6.89314	7.93878	7.63016	5.0596	6.53964	6.9945	7.06057	6.58362	6.91926	5.73197	5.44135	6.00042	4.67496	6.19975	7.14331	5.88266	6.71809
BCAP29	9.39575	9.45838	9.7856	9.37244	9.06022	9.27137	8.95295	9.0784	9.31269	9.63986	9.36906	9.27899	9.15338	9.32917	9.39872	9.58656	9.25384	9.23945	9.48268	9.21194	9.29715	9.86341	9.74916	9.5882	9.47576	9.69434	9.56196	9.75723	9.5766	9.85178
BCAP31	12.1789	12.4789	12.334	12.1911	12.1053	13.0001	11.7837	12.3614	12.5569	12.4165	12.3041	12.3405	12.4908	12.2634	12.206	12.1312	12.748	12.5799	12.5617	12.4467	12.8865	12.2943	12.3346	12.1679	12.1986	12.1672	12.2625	12.3466	12.4395	12.2085
BCAR1	13.1158	13.1683	13.1188	13.1297	13.0846	12.5179	12.851	12.6825	12.6953	13.2172	13.1212	13.2682	12.396	13.0632	12.9651	12.6783	12.5056	12.1121	13.331	13.1991	12.0299	13.0036	12.8306	13.082	13.266	13.0894	12.8824	13.3697	13.1341	13.3595
BCAR3	10.8855	10.9365	11.0015	11.0116	10.8937	10.8909	11.0345	10.8245	10.9166	10.9337	11.1484	11.1895	10.776	10.9847	11.0484	10.9039	11.4689	10.9208	10.5452	11.0083	10.9569	11.3682	11.1483	10.9699	10.9193	11.3751	11.2537	10.8555	11.2469	10.5726
BCAS1	6.98192	5.6916	5.28367	6.10084	6.98958	6.00863	8.20468	6.38121	6.56172	5.87001	7.0137	6.1213	6.97129	6.35233	7.79255	7.58893	5.54391	6.12297	7.72103	7.64873	5.28491	6.26359	6.07279	5.17452	5.72836	6.07805	6.41618	4.60565	5.73481	4.13616
BCAS2	8.87424	9.04991	9.31247	9.02492	8.50925	9.3389	8.29566	9.05912	9.19156	8.98111	8.87156	9.0797	9.15066	8.88349	8.98633	8.78612	9.41897	9.23945	9.29429	8.84527	8.98581	9.5434	9.48938	9.43838	9.36488	9.32583	9.4512	9.07685	9.40437	9.69708
BCAS3	11.3284	11.3866	11.5967	11.371	11.4119	11.3722	11.4615	11.348	11.4233	11.4378	11.5375	11.5447	11.5705	11.5367	11.3209	11.5753	11.7026	11.1533	11.2118	11.4607	11.3653	11.498	11.6984	11.5991	11.4228	11.6947	11.5634	11.5955	11.4816	11.3339
BCAS4	7.87181	7.71841	7.47511	7.59869	8.14307	8.1075	8.01784	8.25607	7.91673	7.98659	7.83485	7.78278	8.17746	7.65226	7.90539	7.85504	7.99586	8.27539	8.06384	7.91479	8.17094	8.00962	7.66164	7.88041	7.74263	7.67916	7.81096	8.0124	7.45701	8.2775
BCAT1	8.32928	8.85979	8.62106	8.55115	8.79277	9.15945	8.71549	9.10083	9.57013	9.00662	8.02511	8.53459	8.96534	8.41994	9.2136	9.33301	7.70489	9.04448	8.58918	8.31453	9.33301	7.91673	8.47187	8.1577	7.48305	8.44739	6.79497	8.26001	7.90293	7.95757
BCAT2	10.9581	10.9714	11.3081	10.9566	10.8217	11.0614	10.2623	10.6804	10.7874	10.7666	10.9238	11.2155	10.6577	10.7754	10.4748	10.5908	11.5729	10.7194	10.6643	11.0893	11.3793	11.2593	10.8681	10.9454	11.1202	11.1344	11.1811	11.131	11.2715	10.9751
BCCIP	10.2602	10.1941	10.4383	10.2315	9.78469	10.2014	9.86104	9.99578	10.174	10.2194	10.1881	10.241	10.2023	9.97672	10.0013	10.1236	10.4524	10.3439	10.1387	10.0886	10.2026	10.5356	10.7812	10.5521	10.4973	10.6856	10.4732	10.0643	10.2662	10.5668
BCDIN3D	6.93902	7.07158	7.45439	7.40211	7.15384	7.70747	7.01629	7.69699	7.53391	7.00181	6.99777	7.50206	7.41994	7.14429	7.05104	7.16829	8.11358	7.88548	7.45764	7.21905	7.88791	7.45005	7.39015	7.18537	7.00227	7.59598	7.52233	6.97142	7.49661	6.26767
BCDIN3D-AS1	6.84426	6.70761	6.80404	7.00288	6.82968	7.04905	7.01629	7.06302	6.68799	6.85856	7.02386	7.22618	6.88198	6.91462	6.85995	6.77809	7.31305	6.97157	7.03096	7.02748	7.81552	7.22577	6.91541	6.20128	5.9195	6.687	7.12683	6.95375	7.11312	5.49529
BCHE	7.24147	7.1838	7.79919	8.15456	6.96301	7.12476	3.98096	6.55748	7.05722	7.30127	6.86873	7.0137	7.15574	7.46676	6.41004	7.0462	7.14409	6.33436	6.67113	7.42784	7.65082	8.05858	8.17613	8.03609	7.51905	7.83141	7.74392	6.33875	6.84426	8.39657
BCKDHA	11.2092	11.1696	11.5607	11.3125	11.0765	11.5084	10.9552	11.187	11.3393	11.416	11.3745	11.6298	11.2203	11.443	11.2136	10.9206	12.1103	11.2066	11.1103	11.4505	11.2863	11.6373	11.4993	11.7366	11.7675	11.7538	11.7664	11.6059	11.7306	11.3312
BCKDHB	10.7325	10.5788	11.2816	10.6124	10.4347	10.5439	10.1122	10.0187	10.3652	10.7777	10.8184	10.8587	10.5138	10.5952	10.5688	10.472	11.3293	10.6294	10.2913	10.9262	11.3069	11.0576	11.3488	11.1706	11.1439	11.1905	11.3117	10.9761	11.1493	11.0168
BCKDK	11.3284	11.6027	11.4167	11.4482	11.3975	11.7427	11.5214	11.4991	11.5876	11.4731	11.4197	11.4582	11.4034	11.4247	11.4228	11.2475	11.7833	11.278	11.4094	11.6132	11.654	11.3452	11.3388	11.3706	11.4601	11.4962	11.3904	11.5591	11.4513	11.3097
BCL10	9.3906	9.31761	9.45607	9.32311	9.39313	9.71539	9.09155	9.32654	9.68743	9.51079	9.53494	9.36551	9.48856	9.48356	9.55439	9.69051	9.64776	9.60999	9.67105	9.31172	9.27751	9.39575	9.67581	9.64681	9.69071	9.59353	9.54414	9.51672	9.28947	10.099
BCL11A	8.42429	7.83053	6.5337	7.87623	8.52044	7.47107	8.33136	9.9577	8.50539	6.18391	7.87741	7.16858	9.06006	9.05079	8.24611	8.17718	5.10532	8.92317	7.1606	6.54226	6.9005	6.28829	5.40646	6.3739	5.20982	6.1116	6.70328	5.92298	5.58325	6.40115
BCL11B	9.57677	9.00078	8.01524	9.81318	10.4804	8.72858	10.7645	10.3027	9.20285	8.72371	9.40354	8.60196	10.3809	9.91647	10.3781	9.88086	7.92326	10.3476	8.99239	9.0414	8.69831	8.10328	7.37856	7.73732	7.76807	7.49396	7.91756	7.96727	7.66164	7.74892
BCL2	11.7634	11.5247	11.3006	11.6171	11.7819	11.5688	11.7666	11.9201	11.6655	11.6303	11.6964	11.4375	11.9754	11.5097	11.7536	11.8864	11.1296	11.8686	11.5989	11.5315	11.6364	11.432	11.6379	11.5136	11.5147	11.3436	11.5904	11.3334	11.3636	11.84
BCL2A1	4.85774	2.01244	5.10462	5.46241	5.71628	6.13161	6.83932	6.46701	6.54699	5.32016	4.98441	3.01611	7.11565	5.58555	6.15015	6.24973	4.87722	6.91999	4.85528	4.59739	6.39155	4.19032	5.623	4.00371	5.27303	5.20297	4.9903	5.11764	4.65953	6.22689
BCL2L1	11.9278	12.2091	12.0687	12.1344	11.8432	12.5053	12.3211	11.801	12.0342	12.4435	11.9444	12.0761	11.8887	11.6892	11.9778	11.9226	12.5251	11.9791	12.2085	11.8475	12.3423	12.0536	12.0775	12.3994	12.3679	12.4665	12.176	12.4372	12.5649	12.2721
BCL2L10	5.10532	6.47356	6.4365	6.27031	5.83514	7.26686	5.77891	6.25676	5.7197	6.18391	5.98414	6.40737	5.88505	5.88542	5.79529	5.64831	7.77297	6.6058	5.88542	6.71551	7.45515	6.4495	7.42834	7.42937	6.00042	6.64165	7.39517	6.3892	6.73716	7.06559
BCL2L11	11.0593	10.9714	11.3284	11.0339	11.1642	10.578	11.2456	11.3996	10.888	10.4164	11.1883	11.1184	11.2731	11.3137	11.235	11.1106	10.9161	11.1327	10.5475	11.2879	11.1864	11.1553	11.2944	11.0867	11.2435	11.005	10.8931	11.4451	11.0117	11.399
BCL2L12	8.66382	8.66517	8.4604	8.57117	8.77357	9.0449	8.6857	8.9785	8.69703	8.45776	8.39711	8.24158	8.87369	8.53706	8.86269	8.61642	8.64595	8.8212	8.70162	8.64131	8.79383	8.29623	7.94971	8.4632	8.45844	8.28903	8.30523	8.43287	8.24445	8.79953
BCL2L13	12.309	12.4032	12.4197	12.2446	12.1657	12.5693	12.005	12.1825	12.2971	12.3423	12.2176	12.3846	12.2852	12.2436	12.0211	12.1808	12.6932	12.4553	12.1222	12.4431	12.4897	12.5655	12.6182	12.4866	12.5324	12.6712	12.4453	12.6027	12.6108	12.4288
BCL2L14	6.53869	6.47356	6.63622	5.94218	6.26528	6.41147	6.16807	5.98414	5.67095	6.38549	6.39155	6.25796	6.13224	6.14911	6.24514	6.69147	6.70973	6.68622	6.29519	6.18622	6.32447	6.07677	6.4935	5.94614	5.96202	6.687	6.56099	6.13288	6.73716	6.30462
BCL2L15	6.39196	6.0339	6.33375	7.22481	7.16656	6.86682	7.89157	6.95222	7.59388	6.93096	7.23048	5.79529	7.11565	7.29917	7.63027	7.31256	6.47356	6.83812	7.02175	7.68114	6.66644	5.96939	5.9728	5.74624	5.27303	5.80159	5.96408	6.00661	6.57486	5.56656
BCL2L2	11.5978	11.7034	11.6982	11.6136	11.5994	11.848	11.647	11.5199	11.601	11.7656	11.482	11.6935	11.5774	11.5745	11.4362	11.7438	12.1136	11.9348	11.4632	11.7252	12.0423	11.7341	11.8178	11.7348	11.671	11.7819	11.6898	11.6844	11.6871	11.6479
BCL3	10.1969	10.9167	9.92397	10.5086	10.7935	10.4564	10.7542	10.7021	10.1464	10.5789	10.1791	9.865	10.425	10.5351	10.9208	10.6574	9.11398	9.40879	11.7208	10.656	9.19597	9.61491	9.3873	10.3659	11.5549	10.21	10.6252	11.4795	10.0772	11.9651
BCL6	10.9995	10.7461	10.4701	10.3547	10.8	10.4746	11.9716	10.6393	10.2496	10.7958	10.8935	10.3276	10.7897	10.7638	11.0801	11.228	9.43505	10.3735	11.8163	10.5802	9.8347	10.5	10.2391	10.7322	10.5359	10.0108	10.3791	10.3406	10.1826	11.1595
BCL6B	9.95648	10.5612	9.51196	9.64453	9.58464	9.86703	9.48919	9.52478	9.79886	10.3217	10.1409	9.7649	9.55079	9.85543	9.5929	9.5766	10.209	9.29423	10.6969	10.071	9.98151	9.26627	9.07201	9.69404	9.59539	9.18467	9.57304	9.27365	9.48784	10.1892
BCL7A	11.0191	10.9332	10.762	10.8311	10.8821	10.7749	10.9995	10.8681	10.8171	10.869	10.9476	11.0117	10.8359	10.8025	10.8175	10.8261	11.1381	10.5599	10.9084	11.0483	10.1266	10.9911	11.1694	11.1197	11.2612	11.0998	11.2184	11.1798	11.1113	10.8825
BCL7B	10.6078	10.8177	10.6702	10.6046	10.6504	11.2229	10.6033	10.8558	10.8098	10.8339	10.5257	10.5246	10.8878	10.5026	10.5849	10.6449	10.9995	10.8435	10.8704	10.8029	11.0296	10.4631	10.5719	10.7823	10.7201	10.6886	10.6769	10.8076	10.7845	11.0133
BCL7C	9.68812	9.59077	9.30424	9.46336	9.97047	10.1747	10.156	10.0367	9.87	9.72778	9.62089	9.60814	9.76564	9.40032	9.5961	9.53636	9.92371	9.98795	9.88156	9.81141	10.623	9.32786	9.28824	9.343	9.31113	9.33415	9.54414	9.22545	9.5518	9.30515
BCL9	11.7424	11.7341	11.67	11.7711	11.84	11.3096	11.8565	11.5859	11.6339	11.787	11.9051	11.7202	11.3829	11.6453	11.8273	11.8502	11.6464	11.407	11.8816	11.9162	11.3779	11.7317	11.576	11.6862	11.6892	11.7048	11.6706	11.9145	11.6871	11.8055
BCL9L	12.5312	12.785	12.6676	13.197	12.9997	10.9433	13.177	12.5075	11.9759	12.6397	12.7143	12.7705	12.0371	12.9846	12.892	12.7539	11.51	11.6609	12.9242	12.6176	11.0616	12.5282	12.2964	12.6101	12.3848	12.4979	12.551	12.6101	12.6321	12.7203
BCLAF1	12.441	12.249	12.2878	12.4739	12.1922	11.863	12.3954	12.2434	12.4026	12.246	12.6061	12.2329	12.5335	12.3829	12.5934	12.6622	11.8887	12.4301	12.5158	12.1088	11.6555	12.4435	12.4024	12.3443	12.3062	12.3934	12.3281	12.1774	12.2002	12.488
BCO1	7.69325	7.88634	8.19591	7.50082	7.63449	8.33869	7.36179	7.90344	8.05409	8.122	7.86363	8.30812	8.30069	7.57286	8.20537	7.64275	9.10236	7.35598	7.94591	8.0257	7.42834	8.39891	8.769	8.35831	8.4995	8.47663	8.45889	8.31664	8.30391	7.81208
BCO2	8.18745	7.94123	8.70521	8.21129	8.25764	8.24264	7.86928	8.39487	8.27852	8.47695	8.25287	8.29823	8.45796	8.36879	8.08155	8.37662	7.99586	8.13224	7.73999	8.66201	8.62024	8.60673	8.81352	8.53412	8.74759	8.67354	8.25667	8.97493	8.55545	9.38042
BCOR	11.9135	11.88	11.7846	11.9328	11.9561	11.386	12.192	11.9424	11.7327	11.7045	11.9784	11.9703	11.8291	11.8773	11.9632	11.9865	11.935	11.8009	11.9607	11.9857	11.3779	11.8847	11.9363	12.0348	11.9557	11.7249	11.8072	11.8657	11.8796	11.8816
BCORL1	10.99	11.1833	11.1529	11.1272	11.2364	10.0568	11.5672	11.011	10.6141	10.9959	11.0631	11.4333	10.843	11.3165	11.0117	11.1841	10.6541	10.3794	11.2253	11.3057	10.1379	10.9498	11.3757	11.3388	11.092	10.9057	11.0941	11.5268	11.1349	11.3128
BCR	13.2417	13.5205	13.2	13.1083	13.186	12.9839	13.4073	13.0984	13.2728	13.3427	13.0837	13.2218	12.8445	13.203	12.9864	12.7832	13.0428	12.8012	13.2643	13.2109	12.8167	13.1947	13.0969	13.176	13.3709	13.1729	13.2127	13.5059	13.3364	13.1579
BCRP3	8.36762	8.829	8.87884	8.46952	8.21307	7.46542	8.43835	7.45764	7.71751	8.70568	8.60561	8.73248	7.92279	8.14642	9.06489	7.64275	8.52712	7.3865	8.81023	8.65363	7.22186	8.52779	8.82412	8.49777	8.32445	8.60181	8.76453	8.95682	9.45838	8.5731
BCS1L	10.3681	10.334	10.3944	10.1644	10.403	10.6084	10.1424	10.2369	10.2484	10.1609	10.2171	10.3326	10.5213	10.2816	10.3101	10.2597	10.5908	10.4442	10.3656	10.4536	10.3117	10.1462	10.1695	10.2065	10.0202	10.3147	10.1576	10.0215	10.1871	9.97664
BDH1	10.6509	10.6309	10.7452	10.4683	10.4871	10.5219	9.84375	10.0199	10.4423	10.6993	10.5908	10.5976	9.8032	9.96337	10.3847	10.0613	11.1451	10.2217	10.5259	10.6988	10.6378	10.6161	11.1021	10.6895	10.6989	10.9369	11.0844	11.0718	11.1682	10.6661
BDH2	12.2434	12.4577	12.7657	12.5689	11.8574	12.8797	11.3233	12.1874	12.332	12.2219	12.0846	12.8789	12.6613	12.1831	12.0237	11.7959	13.305	12.8205	11.902	12.4279	13.0837	12.8079	13.1064	12.8665	12.8016	12.8616	12.8785	12.3744	12.7608	12.4812
BDKRB1	5.32325	5.59384	5.65552	5.94218	4.95501	5.46506	5.71628	5.84066	4.9853	6.4365	5.70141	6.1213	3.89947	4.43732	6.30462	4.91423	6.60356	3.78899	6.53964	5.36232	4.13381	6.02553	7.24481	6.23617	6.30462	6.7109	7.36452	6.75696	7.08886	6.26767
BDKRB2	9.45671	9.55144	9.06406	9.28745	8.90816	9.63295	9.62501	9.64591	9.41897	10.2317	9.92478	9.71904	8.94744	8.97284	10.4708	9.5766	9.47554	8.80735	11.5895	9.67969	8.09905	9.57594	10.2727	9.79795	10.2003	9.97341	10.3447	10.2916	9.76142	10.5359
BDNF	7.12953	6.9248	7.17699	6.89202	7.07413	6.74052	6.11909	6.06767	6.44327	7.08527	7.03767	6.49196	6.4167	5.85281	6.90662	7.00059	6.91028	6.84655	7.02175	7.00733	6.79186	7.40087	7.14195	7.4178	6.70154	7.08292	7.70856	7.04871	7.38827	7.14813
BDNF-AS	7.58001	7.08193	7.50529	7.2813	7.02201	7.67081	6.85172	6.95222	7.58498	7.58723	7.67408	7.67916	7.25365	7.04351	7.37053	7.4249	8.11358	7.37965	7.85292	7.46721	7.80483	8.08201	7.99949	7.95076	7.97666	7.30127	8.01832	7.79709	7.81878	7.42834
BDP1	12.223	12.0709	12.0588	12.1302	11.7544	11.6284	12.1578	11.9175	12.1367	12.0815	12.1687	11.9198	12.2668	12.0481	12.207	12.2347	11.6816	11.9225	12.0678	11.8432	11.5437	12.286	12.4008	12.1055	12.108	12.0899	12.1053	11.87	11.9225	12.2869
BEAN1	8.99069	9.07639	8.74144	8.97628	9.52039	9.14532	8.90021	8.77738	9.11733	9.28665	9.25175	9.16725	8.39428	8.74144	8.97752	9.29864	8.59815	8.46952	8.63043	8.84527	9.02792	8.7495	8.93374	8.78965	8.90309	8.4604	8.21156	9.20568	8.94119	8.60205
BECN1	11.2786	11.3596	11.1793	11.1334	11.2434	11.8427	11.4304	11.5421	11.5937	11.3135	11.0981	11.0457	11.5927	11.115	11.2367	11.2869	11.4426	11.535	11.3852	11.282	11.9664	11.0048	11.071	10.9258	11.0848	11.1235	10.9928	11.0061	11.0157	10.8712
BEGAIN	6.1625	6.8793	6.45308	7.00288	6.24036	5.42134	6.45449	6.44568	6.2275	6.87204	5.56923	6.95982	5.7831	5.85281	5.84066	6.06504	5.7019	5.10392	5.97448	6.77257	5.41151	7.57607	5.45624	7.18537	7.15384	6.1116	6.72008	6.79353	6.84426	6.33852
BEND3	8.70102	8.88966	8.35567	8.71877	8.98761	8.77357	8.50416	8.64742	8.62604	8.99559	8.8	8.62466	8.53773	8.31478	8.80667	8.46641	8.55809	8.26874	9.4116	8.56758	8.64479	8.26536	8.36182	8.1908	8.41916	8.64164	8.51599	8.55097	8.75703	8.46192
BEND3P3	9.74671	10.0635	9.87543	9.99776	9.34823	9.43931	9.76889	9.51225	9.58752	9.39901	9.31247	10.4947	10.1939	9.69785	10.4233	9.5463	9.43931	10.2724	10.4763	9.76044	9.45041	9.48957	9.37013	9.93346	9.58964	9.92371	10.1979	9.4102	9.37105	9.25046
BEND4	6.53869	4.48976	5.40755	5.94218	5.83514	4.52316	4.9903	6.64065	5.82734	4.84413	5.32096	5.05484	6.95883	6.24123	5.18153	5.73197	4.53669	7.36979	5.21919	4.84724	0.398564	5.40755	4.51107	4.00371	3.04014	3.84476	4.25235	3.41484	3.08186	3.95713
BEND5	9.15134	9.24445	9.21886	9.40189	9.2627	9.95347	9.16637	9.60632	9.57431	9.20625	9.32703	9.61937	9.15066	9.03526	9.08778	8.94651	9.99448	9.72618	8.9678	9.53564	9.80502	9.47487	9.52267	9.32458	9.54972	9.45172	9.60824	8.96947	9.54753	8.86468
BEND6	5.5699	5.31422	5.45392	5.46241	5.59888	5.98339	5.94218	6.23861	5.99789	5.79192	4.98441	4.51793	6.86719	5.91654	6.60029	5.81251	4.63347	6.62376	5.88542	5.52265	6.06566	5.03667	5.40646	5.37845	5.01296	5.45981	5.15948	4.31495	4.76395	5.04993
BEND7	10.6625	10.7926	10.7605	10.5286	10.5467	10.7138	10.0749	10.3426	10.5572	11.1885	10.9637	10.839	10.3775	10.3706	10.1164	10.5854	10.9979	10.3027	10.6298	10.8015	11.2206	10.704	11.4302	10.9699	11.177	11.0218	10.7799	10.9383	11.1016	11.0697
BEST1	8.73664	9.13428	8.79819	8.96121	9.21492	8.62697	9.56027	8.93705	8.69356	8.77501	8.58612	8.61931	8.8823	9.15252	9.16506	9.10687	8.52294	8.66013	8.6255	8.93727	8.53375	7.48261	7.04494	7.88041	7.48305	7.71252	7.2699	7.62256	7.46761	7.82212
BET1	8.53267	8.77753	8.84255	8.66573	8.75683	9.11012	8.94567	8.976	8.57725	8.90049	8.69893	8.58804	9.13061	8.88349	8.85215	8.63151	9.1267	9.33225	8.63895	8.81331	9.92686	9.1355	8.95709	9.03535	8.91194	9.07008	8.78236	8.62984	8.76855	8.69356
BET1L	11.5012	11.7329	11.8581	11.87	11.8251	11.8985	11.5543	11.6743	11.501	11.7536	11.6942	11.8121	11.7593	11.7662	11.7229	11.853	12.1897	11.8556	11.6164	11.7953	11.7463	11.6708	11.6649	11.7087	11.8415	11.8467	11.7898	11.9117	11.7248	11.78
BEX1	6.88374	6.75599	6.58079	5.50878	5.59888	8.24264	5.21383	7.21656	8.10902	6.8152	6.99777	6.71947	6.95883	5.44898	5.9256	6.27488	7.73499	6.40628	6.31439	6.89732	7.95501	6.4365	6.57573	7.35312	7.62931	7.0223	6.56099	6.64127	6.63555	6.52152
BEX2	8.84401	8.85695	9.25863	8.86286	8.59939	10.0213	8.5731	9.43692	9.64578	9.03289	8.93277	9.39072	9.2594	8.77316	8.36054	8.52114	10.2966	9.41962	8.68519	9.21492	9.96845	9.34129	9.45376	9.52692	9.72806	9.67459	9.61861	9.31195	9.29639	9.6008
BEX3	11.4171	11.4704	11.4735	11.37	11.3327	12.3466	11.4893	11.8294	11.9766	11.6288	11.6152	11.3815	11.7514	11.2032	11.4738	11.4385	12.1623	12.1392	11.432	11.4728	12.5109	11.5148	11.5009	11.6113	11.6029	11.4987	11.656	11.4427	11.3254	11.6325
BEX4	9.77943	9.68049	9.56477	9.71595	9.49264	10.5202	9.6932	10.0313	10.4263	10.0481	9.89045	9.8659	10.1473	9.56954	9.80813	9.71282	10.8287	10.5979	9.80063	9.97759	10.8194	10.1689	9.9588	10.099	10.4202	10.2682	10.2341	9.9027	9.72239	10.3303
BEX5	6.93902	7.33127	7.60136	7.10565	7.1013	8.37843	7.13218	7.91756	8.12341	7.9374	7.6388	7.73695	8.1593	7.223	7.50071	7.21334	8.48671	7.9511	7.72103	7.89524	8.17094	7.82794	8.26795	8.17352	7.99313	7.66829	8.05307	7.58001	7.97077	7.74892
BFAR	10.9715	11.0142	11.0293	10.9286	11.0399	11.3148	10.9322	11.2167	11.253	10.8593	10.9476	11.125	11.0499	10.9065	10.8491	11.0742	11.2743	11.1982	10.964	10.9871	11.3985	10.8098	11.1244	11.0832	10.9121	10.8925	10.8158	11.0299	10.7542	10.9584
BFSP1	6.33828	6.83242	5.55064	5.64213	5.99472	7.75989	6.866	5.80562	6.89417	6.91807	6.41618	5.76391	6.86719	5.55732	7.0667	6.45175	6.60356	6.51027	7.12004	6.33875	5.79529	6.18929	5.76536	6.13536	5.96202	5.28776	6.26443	5.85281	6.26869	6.22689
BGN	13.7568	13.9286	13.9079	14.1512	14.0616	13.2965	13.793	13.4494	13.6002	14.1909	14.0854	13.7165	13.3316	14.1615	14.8515	14.411	12.2806	13.5354	14.8515	13.3062	12.5639	13.5948	12.7998	13.4596	13.0791	13.1873	13.0522	13.2483	13.6057	13.1755
BHLHA15	3.48504	4.65824	2.66225	7.12871	4.74706	6.69963	6.28829	7.2686	5.82734	3.86436	6.26188	4.38589	7.32496	6.56872	7.00322	5.51828	5.0596	5.15594	6.23002	6.49494	5.92093	5.2262	4.89183	6.20128	4.34684	4.57293	5.28491	5.2715	4.76395	6.19019
BHLHB9	9.33867	9.15465	9.56126	9.14552	8.99872	8.93494	9.00989	9.01547	9.03684	9.41463	9.27474	9.44511	8.99669	9.16119	8.84255	9.09703	9.58964	9.32213	8.88257	9.48268	8.93087	9.46086	9.6551	9.4432	9.54587	9.48759	9.68525	9.40095	9.26132	9.18108
BHLHE40	12.5056	12.7272	12.5792	12.3992	12.0658	12.5711	12.3337	12.0598	12.2804	12.4014	12.6731	12.6777	12.9358	12.2621	12.5976	12.5726	12.4721	12.1928	12.9988	12.6411	11.9822	13.3371	12.9814	13.8648	14.6116	13.4005	13.3442	13.1031	13.2404	14.7289
BHLHE40-AS1	5.17572	4.78173	6.15758	6.23759	5.18618	5.50163	5.83936	5.73635	6.37087	4.90375	5.95039	5.69488	6.13224	6.12545	5.40755	6.19134	5.92971	5.52823	6.16595	5.40865	4.58565	6.23796	6.2995	6.57767	7.13927	6.64165	5.8402	5.97886	6.23759	6.43754
BHLHE41	9.26397	9.62398	8.98023	9.50903	9.31897	9.14532	9.06346	9.10378	9.15059	8.55447	9.24105	8.66407	9.40067	9.08514	9.6635	9.40312	8.14688	9.40081	9.8309	9.27454	8.47463	8.49546	8.18559	8.44857	9.26601	8.32959	8.81875	8.69968	8.60641	9.83705
BHMT	14.1208	14.3541	15.6909	15.3489	14.6018	15.376	13.3122	14.0854	13.9251	14.7699	15.008	15.7146	15.0265	15.008	13.7949	14.1365	16.2286	14.8722	13.6889	15.1892	14.9337	15.5198	16.1363	16.0105	15.8026	15.909	15.4166	15.0446	15.0919	16.0105
BHMT2	14.0397	14.2052	14.8299	14.7851	13.7274	14.3396	13.2634	13.5547	13.8521	14.4247	14.2854	14.7629	14.3636	14.2304	13.6944	13.5834	15.4428	14.5717	13.2285	14.5593	14.7221	14.7496	15.0265	14.8679	14.924	15.0446	15.1217	14.5897	15.0354	14.8605
BICC1	13.4522	13.1826	12.9544	13.2922	13.2857	13.3477	13.1131	13.1895	13.1468	13.5078	13.6301	12.9963	13.2496	12.6976	13.4789	13.244	12.827	12.7508	14.1909	12.7816	12.8631	12.9235	13.1384	12.7879	13.0613	12.911	13.1216	12.9703	12.8467	12.9898
BICD1	11.0132	10.727	10.2095	10.5939	10.5015	10.9304	11.0558	10.7823	10.7859	10.7371	10.9828	9.91239	10.8505	10.5636	11.3892	11.0855	10.2543	10.5567	11.3896	10.1733	10.1996	10.1222	10.1954	10.0511	10.3506	10.3017	10.0733	10.0855	10.2808	10.0397
BICD2	11.7238	11.6756	11.5716	11.5306	11.7411	11.3793	12.1175	11.9255	11.5911	11.5362	11.6697	11.5191	11.6383	11.6533	11.6247	11.6995	11.2712	11.6048	11.5254	11.5136	11.0502	11.5005	11.4673	11.4575	11.4427	11.3957	11.4251	11.5717	11.5824	11.5048
BICDL1	13.203	12.9785	13.1302	12.9308	12.7312	12.6645	13.3505	12.541	12.7632	13.0175	12.9055	13.2078	12.7893	12.8064	13.0161	12.3812	13.2417	12.4143	13.0001	13.0428	11.9893	13.1839	13.3108	13.1337	13.4422	13.3167	13.6301	13.017	13.284	13.3415
BICDL2	7.22597	7.22913	6.78477	7.21182	7.17563	7.23823	8.29566	7.41518	6.99933	7.92679	7.73951	7.13339	7.07039	6.72133	7.66999	7.33563	6.29074	6.53964	8.70965	7.65987	6.45365	6.74773	6.74492	6.93436	7.25839	7.22025	7.16427	7.39368	6.78209	7.91707
BID	9.34464	9.51828	9.3558	9.27802	9.77393	10.0394	9.9255	10.012	9.6132	9.2475	9.52442	9.64465	9.79132	9.40473	9.68543	9.50711	9.654	9.72357	9.7607	9.47507	9.65731	9.12328	9.29068	9.21448	9.2043	9.28014	8.95138	9.40678	9.04409	9.28214
BIK	7.00181	7.20854	6.96489	7.257	6.53249	7.51598	6.8789	7.30627	6.95454	7.00181	6.99777	7.44418	6.97129	7.223	6.24514	6.83932	7.57385	7.14195	7.88165	7.6892	8.33071	7.5097	7.35504	7.32572	7.67577	7.13353	7.55415	7.61172	7.23862	7.64832
BIN1	13.2109	12.9814	13.0811	12.9615	12.8523	13.1384	12.3135	12.8171	12.8437	12.6734	12.6468	13.1683	12.8314	12.7657	12.6719	12.3715	13.0833	13.01	12.5862	13.3684	13.2017	13.1458	12.7632	12.9086	12.8674	12.7512	12.875	12.9993	13.0116	12.7864
BIN2	9.5353	9.27331	8.56172	9.59643	10.0464	9.38774	11.1527	10.3378	9.73669	9.11143	9.19269	8.57713	10.3694	9.96337	10.3875	10.1329	8.05409	9.92898	9.3874	9.01974	8.66482	8.25868	7.49256	8.21254	8.02736	7.76565	7.91756	8.15869	7.68783	8.44847
BIN3	10.0242	10.1895	10.0301	9.91792	10.1462	10.2031	10.1675	10.0956	10.099	9.98324	10.1246	10.1377	9.94143	9.95074	10.0429	9.88086	10.2747	9.84637	10.3919	10.3168	10.0147	9.94604	9.93682	10.1618	10.0463	9.89838	9.95973	10.1498	9.98612	10.1364
BIN3-IT1	7.5684	7.68743	7.30388	7.74243	7.98215	6.97671	7.89157	7.81919	7.18037	7.56467	7.67408	7.46824	7.52649	7.61233	7.87421	7.70656	7.12683	6.98531	7.88521	7.80504	6.91807	7.61548	8.19647	7.9006	8.11506	7.49396	7.7193	8.01958	7.74892	8.24085
BIRC2	11.1272	10.973	11.272	11.0707	10.9041	10.8432	10.8938	10.9768	11.0241	11.2175	11.0478	11.0758	11.0166	11.1067	11.0859	11.2116	11.1085	11.1763	10.8995	10.8917	11.1505	11.336	11.4046	11.3872	11.2265	11.3409	11.3235	11.2545	11.0545	11.5454
BIRC3	10.7665	10.1857	9.43342	10.6457	10.9591	10.1859	11.2421	11.2073	10.7354	10.0107	10.4465	9.60969	11.4778	10.9504	11.1866	11.3308	8.69141	11.4333	9.93104	10.1345	9.88898	9.01296	8.69316	9.82024	10.1402	9.17404	9.40354	10.5772	8.93599	11.2947
BIRC5	5.94218	6.67499	4.98258	4.60936	6.75915	6.84158	7.00571	6.97671	7.12194	5.68805	5.65738	4.67932	6.80669	5.10532	6.93624	5.10005	6.01881	5.88591	6.52127	5.44643	6.45365	4.4255	4.13183	4.63467	4.93467	5.60959	4.7421	5.5356	6.0045	4.13616
BIRC6	14.5593	14.2854	14.2257	14.4358	14.5167	14.1329	14.494	14.4403	14.5481	14.3964	14.5717	14.3396	14.4643	14.5537	14.583	14.7772	14.2081	14.5537	14.3821	14.2817	14.1178	14.3084	14.4751	14.2005	14.2468	14.2257	14.1615	14.2468	14.1806	14.2338
BIRC6-AS2	5.81104	6.07279	6.45308	6.17877	6.45365	6.3456	6.49392	6.23861	6.66644	6.28313	6.47438	6.22516	6.07366	6.63112	6.30462	6.69147	6.21337	6.17724	6.47893	5.80017	6.41452	6.33875	7.17047	6.66947	6.82724	6.38966	6.86561	6.68799	6.57486	6.61318
BIRC7	6.30462	6.37605	5.36674	6.12703	6.21231	6.54226	6.75476	6.60694	5.89621	7.01144	6.89063	6.70444	7.38785	5.82765	7.02322	5.7768	4.14485	5.45828	7.3128	6.93402	5.69049	5.45154	3.42115	4.7337	4.93467	5.45981	4.9903	5.82252	5.23721	5.41845
BISPR	7.2686	7.39679	7.66529	8.02877	7.98215	7.10535	8.59556	8.32712	7.35312	6.96329	7.60136	7.41232	7.55349	8.83067	7.99313	8.461	6.92374	7.49554	7.15165	7.45701	7.5592	7.26938	7.39015	7.0701	7.3473	7.14907	7.12683	6.72224	7.23862	7.0455
BIVM	9.68267	9.57833	9.81348	9.40545	9.49264	9.46437	9.10632	9.19643	9.0469	9.51522	9.52442	9.46399	9.44121	9.1436	9.29085	9.08013	9.26747	9.21309	9.55867	9.37923	9.34926	9.62239	9.53494	9.48748	9.61882	9.89178	9.92673	9.36677	9.67689	9.64235
BLACAT1	5.10532	5.25981	5.1927	5.27906	6.65414	6.5931	6.28829	5.9265	5.20439	5.87001	6.41618	5.05484	5.81496	4.57293	6.27488	6.27488	4.14485	4.77498	7.76204	5.60995	7.02368	5.40755	4.80418	4.7337	5.01296	4.89183	5.15948	5.68013	4.87722	5.28491
BLCAP	12.2205	12.1681	12.3505	12.1894	12.1163	12.2899	11.9427	12.031	12.1847	12.2477	12.2018	12.2804	12.1475	12.229	11.8262	12.1488	12.5739	12.2546	11.9651	12.2243	12.4049	12.2586	12.4256	12.3256	12.3218	12.4305	12.3566	12.3458	12.463	12.32
BLK	8.92861	7.49126	6.13831	8.15456	8.62024	6.57714	7.37551	9.07353	7.46542	6.10478	7.37075	7.15574	9.45435	8.32156	7.03491	8.23736	4.24627	9.86682	6.2526	6.80722	7.3641	5.40755	3.92956	5.84043	4.34684	4.31694	4.25235	6.33875	5.10005	6.69678
BLM	6.36574	6.32059	5.05484	6.8789	7.06153	6.51005	6.41967	7.07836	6.50065	5.23907	6.66524	5.59529	6.66947	6.39237	7.2686	6.70973	4.80171	6.74893	6.63846	6.12437	6.43304	5.2262	5.24529	5.64978	5.27303	5.45981	4.63957	4.86343	4.87722	5.35747
BLMH	10.7185	10.7732	10.8982	10.8261	10.7305	11.2726	10.5662	10.8966	11.0993	10.7112	10.7494	10.9258	11.0722	10.7218	10.7935	10.7242	11.1349	10.9171	10.9304	10.9234	11.2733	10.9008	11.0272	10.9064	11.0649	10.9516	10.8077	10.8386	10.7143	11.0805
BLNK	10.3469	9.83529	9.68049	10.0693	10.2487	10.0522	10.4988	10.353	10.1541	9.98837	10.2521	9.78399	10.054	9.71933	10.3084	10.2404	9.69907	10.0104	10.3311	10.0677	9.05537	10.1527	9.8785	9.90449	10.1952	10.1021	10.1434	9.83715	9.77883	9.86218
BLOC1S1	8.88141	9.10179	9.2855	8.97628	9.05567	10.16	8.46339	9.59628	9.25046	9.04461	8.70999	9.13434	9.23582	8.98297	8.72259	8.86177	9.94613	9.65747	8.85542	9.48042	10.4107	9.00362	8.99461	9.16598	9.11212	9.19373	9.28582	9.14437	9.12982	9.30515
BLOC1S2	9.3211	9.13017	9.28125	8.88633	9.19947	9.57289	8.68063	9.44186	9.67506	9.4795	9.27474	9.09956	9.49306	9.11956	9.15654	9.27061	9.62432	9.66323	9.27281	9.02427	9.67226	9.17297	9.19279	9.14738	9.09874	9.30074	9.19999	9.04548	8.982	9.63825
BLOC1S3	9.06642	9.46859	9.31998	9.40189	9.24777	9.20981	9.33822	9.32187	9.24105	9.04461	9.12495	9.44919	9.43031	9.65045	9.51828	9.40523	9.48029	9.34996	9.11132	9.43156	8.88877	9.06346	9.21901	9.42103	9.35658	9.37648	9.37976	9.17839	9.33661	9.25787
BLOC1S4	8.71142	8.8058	8.83511	8.56035	8.82754	9.4499	8.53928	9.19643	8.90545	8.71518	8.40259	8.55759	8.91324	8.63043	8.77293	8.44033	9.18314	9.34464	9.04106	8.71756	9.60119	8.32868	8.24158	8.39237	8.71169	8.5889	8.55633	8.65092	8.74478	8.58536
BLOC1S6	10.7929	10.7155	10.8706	10.7002	10.6585	10.8385	10.6925	10.7332	10.8413	10.7676	10.602	10.6953	10.8698	10.6818	10.6621	10.7652	10.7047	10.9768	10.6406	10.7156	10.9687	10.6826	10.9187	10.7443	10.7493	10.9555	10.7123	10.76	10.8333	11.076
BLVRA	10.0542	10.3549	10.0655	10.1939	10.1529	10.8967	9.8526	10.5692	10.595	10.1492	10.0736	10.2473	10.6448	10.3145	10.1808	10.1027	10.7151	10.7698	10.2671	10.2838	10.8816	10.0041	10.0729	10.099	9.79425	10.0108	9.99776	9.87912	9.80631	9.9546
BLVRB	10.5811	10.9081	11.2034	10.8033	10.6479	11.5863	10.6475	10.9563	10.994	10.7858	10.5233	10.9398	10.8542	10.8661	10.38	10.4252	11.6688	11.2689	10.5373	11.0297	12.0193	10.8751	10.7011	11.0384	10.841	11.0608	11.0493	11.0658	11.2778	10.8513
BLZF1	9.88409	9.65663	9.98875	9.96627	9.65763	9.67708	9.72491	9.56218	9.81549	9.86922	9.85084	9.76955	9.9589	9.63914	9.81879	9.86218	9.98101	9.88726	9.81431	9.81831	10.0041	9.93158	10.1155	9.9076	9.77459	10.0511	9.7274	9.7207	9.67275	10.0442
BMF	11.1772	10.606	10.2187	11.0227	11.1856	11.1005	12.1782	11.6313	11.1024	10.392	11.1484	10.9185	11.4688	11.3395	11.546	11.1984	10.4397	11.0872	11.6059	11.225	10.0439	10.5394	10.7276	10.641	11.0649	10.5584	10.1858	10.5713	9.93649	9.77744
BMI1	6.39196	6.83242	7.06153	7.15341	6.67335	6.91658	6.56969	6.76373	6.88388	6.36011	5.98414	7.0137	7.10446	6.77443	6.62962	5.7768	6.92374	6.82354	6.61934	6.51656	7.81552	6.41147	5.9728	6.96049	6.61904	6.8207	6.79497	7.00059	6.60319	7.18469
BMP1	10.9825	11.4578	10.3675	10.8684	11.4295	10.6986	11.0251	10.8736	10.8431	10.843	11.0077	10.5693	10.5271	10.9794	11.4569	10.979	9.51212	10.1949	11.3419	10.6724	9.82403	10.124	9.55079	10.1432	10.0864	9.80672	9.95249	10.8076	10.0508	10.2494
BMP2	8.88141	9.01828	8.96668	8.89339	9.09216	9.42825	8.45776	8.99069	9.15492	8.9927	8.58612	8.81626	9.06573	9.08514	8.80667	8.70874	9.1924	9.01125	9.00362	9.0043	8.62024	9.49704	8.58864	9.48989	8.88955	8.68266	8.86269	8.98637	8.99507	9.92708
BMP2K	11.2919	11.3434	11.0326	11.2841	11.5211	11.2955	11.2656	11.5729	11.4798	11.2543	11.3762	11.1037	11.4768	11.327	11.4583	11.5014	11.0016	11.4021	11.2578	11.0862	11.092	11.187	11.111	11.2286	11.0933	11.0937	11.0941	11.1262	11.0598	11.1028
BMP4	9.43652	9.12095	9.11256	9.71595	9.62145	9.35824	9.7392	9.83597	9.96337	9.23491	9.52159	9.34896	9.67666	9.61609	9.67969	9.60099	9.59628	9.57491	9.7649	9.42352	9.32502	9.16732	9.05431	9.35505	8.75664	8.71533	9.12305	7.75372	8.85735	8.46849
BMP5	7.55415	8.31453	9.26902	8.91636	8.27362	7.39237	0.398564	8.19576	7.1533	8.25726	6.86873	8.24158	7.97084	8.34577	5.28446	8.5864	7.74431	8.63018	4.44792	6.91509	8.5178	8.16617	7.6722	8.63691	7.07413	8.03225	7.55415	7.31012	7.66164	7.8683
BMP6	9.5353	8.7601	8.43877	9.51819	8.28526	8.52214	9.88964	9.10378	9.03051	9.48529	9.5975	8.67416	9.23821	9.21125	9.99448	9.15145	8.73489	8.02378	11.3605	9.42593	7.83	9.06346	8.46528	8.64211	8.7168	8.29566	10.02	7.59197	8.55019	8.70784
BMP7	8.56798	8.6599	8.62106	8.73978	8.78195	8.82972	6.94199	8.86785	8.32212	9.36625	8.19937	9.2467	8.35664	8.66637	8.15135	7.81878	9.17613	8.59737	8.35287	8.50795	8.89259	9.92828	9.32805	9.73107	9.81801	9.79664	9.54006	10.0709	9.53652	9.88409
BMP8A	9.94613	9.7332	9.38242	9.85482	9.77943	9.015	9.97164	9.78864	9.25046	9.69105	9.20504	9.24176	8.98734	9.29383	9.9273	9.61666	9.0797	9.22131	9.53942	9.74719	8.75108	9.33184	9.34996	9.75657	9.79261	9.27592	9.73454	9.32845	9.40986	9.52201
BMP8B	7.76807	8.57016	8.57404	8.31478	8.28526	8.00332	8.87212	8.30579	8.15097	8.59068	8.07965	8.37171	8.41049	8.50571	8.37523	8.68351	8.01582	8.21129	8.39179	8.38772	7.63928	8.21254	8.58195	7.96282	7.93834	8.25201	7.88548	8.28309	7.77039	7.93774
BMPER	5.71365	6.10152	6.4944	6.54127	5.76193	6.47401	6.40067	6.11564	5.82734	6.02603	6.26188	6.15487	5.68455	6.4365	6.16983	5.81251	6.96572	6.42105	5.97448	5.6537	7.189	5.87065	6.72965	6.16735	6.72476	6.41722	6.56099	6.13288	6.16662	6.5796
BMPR1A	10.5746	10.197	10.4701	10.4458	10.4834	10.3007	10.4822	10.5769	10.4688	10.3551	10.557	10.5328	10.4547	10.4349	10.5038	10.6124	10.4275	10.5349	10.7753	10.3616	10.1335	10.5285	10.7396	10.5244	10.4349	10.4407	10.487	10.425	10.4028	10.2806
BMPR1B	9.40545	8.48379	9.42303	9.24705	8.89273	9.00362	10.2521	8.69625	9.21523	9.40752	9.66515	9.54094	8.80326	9.20684	9.95973	9.49704	9.98715	9.24468	9.13963	9.30854	9.1014	9.75554	10.4012	9.31926	9.62792	9.69145	9.75657	9.448	9.72	9.71732
BMPR2	13.1639	13.017	12.9308	13.0445	13.2223	13.0586	13.2422	13.1612	13.1513	13.2359	13.1447	12.8451	13.1925	13.1537	13.1659	13.4168	12.6925	13.1435	13.2857	12.8577	13.0722	12.9273	12.9138	12.8458	12.8706	12.7693	12.9379	12.785	12.8827	12.9454
BMS1	11.3623	11.3441	11.3024	11.3111	11.3159	11.3948	11.3661	11.3874	11.5946	11.4446	11.4932	11.4224	11.7064	11.2918	11.4233	11.4935	11.2969	11.4675	11.6636	11.3882	11.2843	11.2971	11.4719	11.376	11.4016	11.2872	11.3168	11.2464	11.2323	11.2884
BMS1P20	10.4211	10.9936	10.1013	12.6182	10.8904	11.6765	11.21	12.0017	11.3603	10.2182	11.284	10.5165	12.4143	11.5308	12.0471	11.3339	10.069	11.2118	11.2472	11.4291	11.4771	10.0347	10.1046	10.5999	9.76889	10.0456	9.6551	10.2983	9.87456	10.2762
BMS1P21	6.30462	6.63219	6.5337	6.61996	6.50588	6.41147	7.1864	6.33875	6.28829	6.66044	6.44991	6.85248	6.71452	6.68378	6.24514	7.03305	6.51152	6.57767	6.89417	6.33875	6.03812	6.66123	6.51152	6.64737	6.72476	6.8859	6.79497	5.7197	6.36574	6.30462
BMS1P4	9.62304	9.39033	9.36997	9.51335	9.59708	9.17103	9.57523	9.45409	9.55439	9.43278	9.50947	9.71282	9.51522	9.5266	9.49315	9.74635	9.43741	9.46677	9.55372	9.53564	9.86559	9.5362	9.78344	9.32458	9.30612	9.40329	9.47361	9.44186	9.45098	9.06965
BMS1P5	8.07593	8.23803	9.43342	8.52339	8.34367	7.91673	7.34009	7.85448	8.36687	8.41994	8.17146	8.65504	8.10879	8.23526	8.00099	8.05952	8.4238	7.94374	8.46422	8.44761	8.21431	8.71867	8.66717	8.5829	8.63112	8.83057	8.73103	8.7074	8.47012	8.89717
BMT2	8.35222	8.19591	8.56852	8.44033	8.24043	8.43287	8.29566	8.30579	8.66407	8.39976	8.84116	8.5166	7.99822	8.5508	8.33033	8.3945	8.56814	8.28302	8.2942	8.29984	8.3879	8.66533	8.96947	8.78965	8.97568	8.71023	8.63889	8.69356	8.74478	8.60854
BMX	7.97578	8.09247	7.84021	7.76358	7.66224	7.67081	7.34993	7.75138	8.11646	8.02469	8.12921	8.44099	8.52476	8.29578	8.17264	7.70656	8.73489	7.68466	7.95327	8.48886	8.06114	8.16617	9.19279	8.76361	8.22178	8.95378	8.79307	8.35127	8.55019	8.118
BNC2	12.2565	12.1638	12.373	12.2546	12.3812	12.5246	11.3397	12.5001	12.3483	12.1553	12.2004	12.2788	12.3455	12.2885	11.4127	12.214	12.373	12.3253	11.3712	12.3769	12.8824	12.068	12.4897	12.3812	12.4336	12.5045	12.25	12.1704	12.2741	12.2763
BNIP1	8.1337	8.36789	8.46502	7.93361	8.27362	9.05497	7.6388	8.60181	8.40516	8.2919	8.32212	8.26208	8.42732	8.08948	8.1257	8.14612	8.93478	8.43574	8.41074	8.43129	8.95519	7.98693	8.46528	8.40957	8.3024	8.11398	8.35594	8.07713	8.27596	8.71917
BNIP2	10.9213	10.7602	10.8663	10.9062	10.8366	10.8601	11.0382	11.1291	11.1154	10.915	10.9708	10.7185	11.0121	10.8786	10.935	11.142	10.6497	11.2588	10.9561	10.6002	11.2244	11.0933	10.9816	10.9142	10.8238	10.7782	10.8321	10.7108	10.7774	11.0607
BNIP3	10.9147	11.1525	11.5113	10.8473	10.6223	11.4686	10.3488	10.5501	10.9152	10.9387	10.8088	11.2887	10.928	10.8164	10.3603	10.6093	11.9532	11.1941	10.4353	11.2132	11.6852	11.3461	11.5205	11.5322	11.3877	11.4237	11.6404	11.2937	11.4513	11.4786
BNIP3L	11.8892	11.9593	12.3298	11.8968	11.5494	11.8908	12.6318	11.6939	11.8413	11.8304	11.7036	11.9407	12.0421	11.9243	11.7267	12.0224	12.0399	12.1856	11.4462	12.0054	12.2828	12.2874	12.1917	12.2654	12.0434	12.0155	12.046	12.015	12.0957	12.2894
BNIPL	7.487	6.77211	7.97019	8.09281	7.37053	7.38175	8.53429	7.74149	7.77664	7.90671	7.81652	7.96576	7.10446	8.08139	7.48987	7.76342	7.93774	7.99697	7.12004	7.54847	7.95501	8.07417	7.98659	7.10776	7.09263	7.78582	7.22504	7.12164	7.62931	6.26767
BOC	10.8566	10.8193	10.2078	10.7274	10.8057	10.2664	10.7181	10.5474	10.2595	10.564	10.5527	10.2484	10.1284	10.9746	10.4785	10.6346	9.85431	10.276	10.9579	10.3244	10.3117	9.88566	9.37443	10.0484	10.1261	9.69145	9.92959	9.87781	10.1579	10.0519
BOD1	10.4116	10.2545	10.3042	10.3306	10.1839	10.7732	10.0584	10.7276	10.3756	10.2659	10.1531	10.359	10.5321	10.2375	10.2233	10.2974	10.8185	10.7384	10.3324	10.4256	10.7306	10.3027	10.3565	10.2592	10.2777	10.2048	10.1689	10.1381	10.3179	10.3273
BOD1L1	12.604	12.4589	12.4681	12.6139	12.3903	12.1956	12.744	12.6651	12.4874	12.2511	12.4303	12.247	12.721	12.4505	12.5391	12.6382	11.9336	12.4841	12.4057	12.4111	12.1883	12.3863	12.4983	12.2827	12.3208	12.3448	12.2777	12.1591	12.1813	12.1934
BOK	11.7851	11.8001	11.4898	11.6012	11.7833	11.9363	11.6451	11.6468	11.3421	11.6112	11.4596	11.6083	11.7246	11.3736	11.9344	11.2046	12.057	11.7121	11.7229	11.7646	11.2035	11.358	11.3358	11.3196	10.9591	11.2059	12.1339	11.4141	11.6849	11.1621
BOLA1	8.71857	8.81286	8.97683	8.88976	9.04847	9.87529	8.59047	9.13143	8.95935	8.76602	8.56024	9.03182	9.1004	8.74597	8.39262	8.5655	9.92371	9.46443	8.74253	9.13913	10.3668	8.98637	8.98871	9.04198	8.82361	9.05758	9.15465	8.93432	9.21158	8.63521
BOLA3	8.58971	8.59311	8.6262	8.20468	8.24043	9.44511	7.76635	8.91535	8.82338	8.64774	8.01723	8.47582	8.61579	8.2111	8.14589	8.17718	9.29455	9.12305	8.61822	8.72259	10.2661	8.33869	8.84872	8.74825	8.4995	8.67354	8.69244	8.5635	8.50837	8.6789
BOLA3-AS1	8.20836	8.12533	8.35567	8.15456	8.32928	8.26483	8.63815	8.25096	8.21968	8.17806	8.18939	8.30812	8.40516	8.37217	8.30169	8.68777	8.2811	8.2963	8.22571	8.48183	8.68122	7.77046	7.98659	7.79754	7.49337	7.89682	7.86735	8.25518	7.74892	7.82212
BOP1	9.56418	9.8949	9.61279	9.59477	9.55623	9.67434	9.51862	9.66282	9.3015	9.77042	9.50663	9.49553	9.52039	9.60954	9.73638	8.93559	9.45963	9.29604	10.1552	9.55511	9.15496	9.38158	9.31756	9.5838	9.44392	9.40329	9.44746	9.56473	9.57304	9.47018
BORA	7.06983	7.30333	7.19174	7.04599	7.12315	7.09188	7.14958	7.2686	7.53391	7.31339	6.79477	7.03096	7.22618	7.47511	7.21383	7.08231	7.36514	7.12982	6.96732	6.88263	6.87983	7.0612	7.15705	6.60282	6.22067	6.7109	6.84426	7.06336	6.80271	6.79635
BORCS5	10.611	10.292	10.5111	10.493	10.6189	10.513	10.6231	10.5245	10.4506	10.3577	10.472	10.5194	10.5	10.4554	10.5071	10.5535	10.5533	10.52	10.288	10.4962	10.5781	10.5508	10.609	10.5535	10.5257	10.6001	10.5374	10.474	10.5896	10.3097
BORCS6	8.90097	9.31482	8.75985	8.83625	9.1031	9.43264	8.93727	9.49704	9.17133	9.2509	8.81476	8.95695	9.23582	9.01296	8.77804	8.461	9.36305	9.40598	9.02376	9.22716	9.4919	8.69625	8.7943	8.89161	8.65624	8.94029	9.14738	9.13093	9.1205	8.55919
BORCS7	8.73664	8.34526	8.92944	8.58248	7.94123	9.21236	8.37943	8.65905	8.92752	8.71897	8.34367	8.41884	8.35664	8.20575	7.78254	8.19792	9.40619	8.93478	8.26412	8.41551	9.77655	9.22228	9.04713	9.19434	9.07232	9.18698	9.47631	9.12193	8.94119	9.43785
BORCS8	8.81145	9.00078	8.75526	9.04291	9.1203	8.72858	9.11428	8.70568	8.70466	9.00925	9.08025	9.02451	8.48028	8.98297	8.91194	8.89218	8.94307	8.47383	9.11132	8.83625	9.19597	8.88405	8.92288	8.99814	8.90839	8.9496	8.79307	8.87982	9.02869	8.88642
BPGM	9.78968	9.96109	9.83101	9.70933	9.86164	10.6938	10.7351	9.88028	10.0658	10.3593	9.74273	9.8628	10.0485	9.48356	9.81566	9.65251	10.4651	10.1221	10.4629	10.0503	10.3303	9.82403	10.0966	9.91792	10.1908	10.1515	9.99776	10.0855	10.1101	10.2203
BPHL	11.5205	11.6741	12.2475	11.5932	11.2559	12.1446	10.3514	10.7886	11.1539	11.0981	11.3402	12.3516	11.9201	11.7235	11.1217	10.9068	12.8731	12.0959	10.5743	11.8347	12.4143	12.3377	12.5721	12.3965	12.316	12.5539	12.6156	11.7552	12.4051	12.0572
BPI	5.17572	5.72776	5.1927	6.66105	5.32409	6.62471	6.34989	5.36674	4.02725	6.28313	4.21961	5.69488	5.16094	6.46882	5.51412	3.20749	8.95581	6.38966	4.44792	6.67788	6.54246	6.66123	8.04125	8.73848	5.9195	7.0223	8.33033	6.77443	7.41462	7.63701
BPNT1	10.359	10.5168	10.5315	10.2806	10.3484	11.1355	9.87456	10.3957	10.7644	10.6556	10.531	10.5963	10.8991	10.3735	10.2092	10.2079	10.7465	10.5224	10.7194	10.7003	10.9886	10.5233	10.6157	10.453	10.5217	10.5839	10.4944	10.491	10.4592	10.2863
BPTF	13.4031	13.0927	13.2013	13.3364	13.1844	12.9569	13.639	13.3876	13.3978	13.1537	13.4315	13.1568	13.4422	13.3108	13.4038	13.5176	12.9039	13.2319	13.1807	13.1458	12.8287	13.2516	13.2666	13.1513	13.1624	13.176	13.2306	12.913	13.0567	13.0755
BRAF	11.2993	11.1128	11.1784	11.1559	11.1659	11.3006	11.4086	11.3208	11.3245	11.3061	11.3026	11.1821	11.369	11.2341	11.1911	11.4142	11.3437	11.4381	11.23	11.3133	11.5477	11.2904	11.5445	11.3388	11.4689	11.3154	11.363	11.3513	11.322	11.3662
BRAP	10.4655	10.2749	10.3145	10.4357	10.3892	10.3086	10.4601	10.2336	10.333	10.3888	10.4813	10.3366	10.429	10.4829	10.3994	10.293	10.2935	10.2982	10.4149	10.27	10.4746	10.3158	10.4809	10.2997	10.3798	10.3621	10.4314	10.1311	10.2095	10.1922
BRAT1	11.0251	11.2896	11.2822	11.336	11.2784	10.7749	11.3688	11.0009	11.0299	11.0993	11.2012	11.3191	10.8153	11.2906	11.2678	10.7587	11.1434	10.7479	11.0975	11.1675	10.2925	11.192	10.956	11.22	11.1253	11.1757	11.207	11.2946	11.2723	11.1248
BRCA1	8.27664	8.44145	8.37925	8.06637	8.35058	8.29165	9.00989	8.83625	8.48151	8.58054	8.34625	7.96576	8.58364	8.0426	8.75872	8.36776	8.51599	8.40911	8.58503	8.24432	8.41884	7.93065	8.11558	8.25745	7.866	8.06454	8.27362	8.04974	8.30391	7.80174
BRCA2	7.37683	7.27692	6.7403	7.32314	6.98958	6.74052	7.82729	7.6193	7.205	6.91807	7.09524	6.38491	7.15574	7.41599	7.82794	7.48329	6.38683	7.50428	7.3229	6.62279	6.71908	6.46984	6.78209	6.40115	6.82724	6.59466	6.44716	7.04871	6.41883	6.8859
BRCC3	9.6583	9.87947	10.242	9.59643	9.299	9.50453	9.61829	9.26627	9.67689	9.80813	9.82904	9.74131	9.84592	9.59843	9.59015	9.69973	9.80868	9.43969	9.83957	9.58747	9.48833	10.1445	10.3516	10.0136	9.98553	10.0869	10.1349	9.71242	9.89354	10.0684
BRD1	11.593	11.5504	11.3343	11.5462	11.788	11.1493	12.0115	11.7673	11.4752	11.4462	11.601	11.5666	11.5337	11.6545	11.6506	11.5464	11.2001	11.2898	11.7139	11.5878	10.9197	11.405	11.3261	11.4575	11.4776	11.3567	11.4375	11.4949	11.3177	11.5015
BRD2	9.32342	9.18565	8.86367	9.39249	9.40698	5.96115	6.05434	9.62008	7.59388	8.81714	9.28333	9.52075	9.01566	7.55852	8.83057	9.31661	8.80752	9.12719	5.82734	9.18508	5.41151	9.39575	9.3873	9.25459	7.75574	8.49908	5.9294	8.85474	7.97077	6.61318
BRD3	11.2735	11.2064	11.0767	11.3827	11.5147	10.963	11.619	11.5833	11.1718	11.3269	11.3934	11.1471	11.2584	11.2969	11.4181	11.3109	10.8123	10.9868	11.4562	11.2989	10.3426	11.1752	11.0669	11.1235	11.1109	10.9866	11.0291	11.1188	11.0614	10.7373
BRD4	13.0192	13.0331	13.1397	13.3281	13.1537	11.6827	13.4345	12.7075	12.4643	13.002	13.1212	13.1435	12.3676	13.2791	13.2756	13.1524	12.0797	12.1883	13.32	13.0551	11.5059	13.1011	12.9184	13.1441	13.1807	13.0876	13.1789	13.3229	13.19	13.2699
BRD7	10.9863	10.8466	10.8561	10.8684	10.7412	11.0838	10.8631	11.011	10.9332	10.8232	10.8726	10.8057	11.1745	10.7402	10.9355	10.9381	10.9006	10.9798	10.9398	10.8268	10.6475	10.8512	11.0506	10.8158	10.9695	11.0464	10.9866	10.764	10.787	10.8988
BRD7P3	6.47806	6.39508	6.47438	6.8789	6.82968	5.63849	5.91654	6.38121	6.50065	6.57662	6.5803	6.40737	7.00543	7.10835	7.08193	7.13438	6.0627	6.83812	6.60029	5.80017	6.45365	7.03321	7.04494	7.36839	7.01687	6.59466	6.92843	6.9175	6.92174	6.71809
BRD8	11.6027	11.5148	11.5164	11.3862	11.5343	11.328	11.773	11.4738	11.5089	11.3856	11.647	11.4295	11.7346	11.4721	11.5585	11.5772	11.3543	11.362	11.6188	11.5097	11.2065	11.6877	11.65	11.6057	11.7267	11.5791	11.6044	11.1763	11.3463	11.145
BRD9	11.1706	11.2317	11.1154	11.1334	11.2294	11.0088	11.1074	11.2398	11.0608	11.088	11.2703	11.1663	11.1245	11.1343	11.0954	11.1872	10.8856	11.2029	11.0216	11.0699	11.245	11.0382	11.1796	11.2034	11.0184	11.0642	11.3347	11.1458	11.0614	11.0419
BRE	11.5084	11.4655	11.5405	11.4569	11.5071	11.745	11.19	11.2487	11.5641	11.5574	11.5882	11.5061	11.5012	11.2791	11.491	11.6163	11.6448	11.4381	11.7893	11.4831	11.7133	11.4804	11.5663	11.4939	11.626	11.539	11.4896	11.5514	11.4477	11.4902
BRE-AS1	6.41883	6.78629	6.4944	6.27031	6.77527	7.22025	6.64481	6.75249	6.74742	7.13339	6.50065	6.50711	7.50742	6.21884	6.30462	6.79534	7.21572	7.25994	7.60892	7.31953	6.87983	7.07694	7.46059	9.051	8.59119	8.11398	7.46637	8.94394	7.51461	10.1983
BRF1	11.1152	11.2771	11.2712	11.3571	11.2681	10.6609	11.3936	11.125	11.0188	11.0946	11.3243	11.4018	11.0082	11.3157	11.2607	11.0335	11.0142	10.8363	11.1657	11.253	10.4313	11.4187	11.2192	11.2803	11.362	11.2712	11.3642	11.3261	11.4321	11.1588
BRF2	8.89306	9.0316	9.08037	8.92119	9.24491	9.38981	8.87858	9.19022	9.2725	8.96799	8.87156	9.10378	9.13321	9.06708	8.95868	9.09492	9.39675	9.25836	9.01617	9.1203	9.2059	8.93705	8.84116	8.7229	8.7531	8.69131	8.80703	8.65092	8.64131	8.49478
BRI3	11.2631	11.7322	11.2881	11.0839	11.3849	12.02	11.0319	11.9446	11.4719	11.4907	10.8733	11.1441	11.2068	11.0244	10.8786	10.956	12.0999	12.3461	10.8704	11.5272	13.1953	11.033	11.4923	11.7967	11.5384	11.5834	11.3585	11.5731	11.7306	11.4199
BRI3BP	8.09605	8.17613	8.37298	7.98339	8.24611	8.60269	8.10021	8.67666	7.90293	8.45776	7.94902	8.10671	8.19062	8.19138	7.86136	7.81878	8.40957	8.17594	8.25096	8.17607	9.00104	8.00962	7.91012	8.42323	8.44074	8.04919	8.53412	8.67975	8.69733	8.118
BRICD5	7.68313	7.66287	7.85532	7.51152	7.94123	6.77211	8.26248	7.48075	7.51574	7.31339	7.67408	7.86017	7.73381	7.84579	7.63027	7.46118	7.35167	6.80864	7.59907	8.14612	6.64523	7.88165	7.82285	7.44062	7.94616	7.73769	7.83302	8.1037	8.0391	7.45875
BRINP1	9.0043	7.25962	7.10594	7.42249	9.0703	8.43087	8.38695	8.00962	8.13067	8.327	9.04448	8.57205	9.71002	7.76828	9.78795	7.20007	9.21863	7.34333	9.02691	8.23783	7.08247	7.14633	9.12328	7.66989	8.59556	8.92014	8.86916	7.60187	8.17042	7.23703
BRINP3	5.25293	7.15781	6.02834	6.94302	6.02956	6.94845	6.02553	6.06767	6.60356	6.75961	6.75961	6.75171	6.90884	7.61233	6.45365	6.06504	8.09905	5.83356	5.56808	6.85248	5.22037	7.11946	7.88521	6.09884	6.61904	7.45778	8.40605	6.49583	7.51461	6.40115
BRIP1	6.19627	6.5245	6.60356	5.9093	6.1485	6.60563	6.58609	6.64065	6.09884	5.61887	6.23181	6.19279	6.66947	5.64525	6.74269	6.09884	6.66947	6.71629	6.23002	5.6537	6.4821	6.23796	6.2275	6.81718	6.68212	6.31246	6.7403	6.13288	6.80271	6.36895
BRIX1	8.18745	8.09247	8.43269	8.3879	8.18904	8.72354	8.05028	8.29623	8.60028	8.5197	8.25287	8.59844	8.51101	8.16876	8.45018	8.53114	8.8116	8.70312	8.89717	8.01909	8.87077	8.70302	8.71276	8.59047	8.7985	8.58054	8.71877	8.55097	8.36054	9.11212
BRK1	11.639	11.6136	11.6065	11.4639	11.7213	12.5969	11.4341	12.0641	12.0115	11.6472	11.4949	11.4491	11.8826	11.3765	11.6188	11.8012	12.2528	12.4539	11.4885	11.5753	13.0024	11.5244	11.5674	11.6467	11.6373	11.6745	11.6825	11.3696	11.7306	11.5306
BRMS1	10.3254	10.5569	10.4324	10.3655	10.4527	11.3039	10.3592	11.0173	10.6535	10.3801	10.211	10.2307	10.823	10.2247	10.4132	10.1877	10.8462	10.9121	10.617	10.5161	11.2326	10.0964	10.091	10.1291	10.0672	10.1533	10.2659	10.3961	10.3294	10.1892
BRMS1L	7.75574	7.89136	8.02662	7.84641	7.42834	8.01803	7.77425	7.42563	7.83541	8.22178	7.95697	8.00887	8.09221	7.64619	7.47992	7.65282	8.39806	8.04146	8.2345	7.72887	8.71609	8.45816	8.72746	8.72858	8.61512	8.55962	8.41354	8.30961	8.57523	8.84748
BROX	10.6657	10.522	10.8061	10.6712	10.4509	10.173	10.6114	10.3983	10.6569	10.8107	10.8464	10.6996	10.636	10.5295	10.7207	10.867	10.4504	10.3838	10.5965	10.5175	10.4211	10.8484	10.8986	10.8946	10.7589	10.9169	10.841	10.7759	10.9001	10.6952
BRPF1	10.7665	10.9778	10.6896	10.794	11.1011	10.7415	11.3562	11.187	10.8345	10.8988	10.7728	10.7694	10.8555	10.9438	10.9722	11.0148	10.6479	10.721	10.988	10.8982	10.507	10.5111	10.5111	10.475	10.4647	10.4324	10.4848	10.6041	10.4412	10.7083
BRPF3	12.5255	12.6771	12.7794	12.6156	12.5632	12.162	12.4825	12.5558	12.3694	12.5896	12.4453	12.8844	12.5383	12.6767	12.1954	12.4971	12.6431	12.4327	12.3984	12.8012	12.4259	12.7665	12.9679	13.0005	12.9258	12.9741	12.9717	12.9409	12.8334	12.9379
BRSK1	7.49835	7.72552	7.34063	8.17396	8.37379	7.73144	8.45776	7.91756	7.80504	7.20661	7.6388	7.40061	7.91002	7.76828	8.47526	7.97019	6.34309	7.70727	7.77131	7.44741	7.5373	6.76741	6.55319	7.31037	6.74614	6.52127	6.3285	6.64127	6.33309	6.61318
BRSK2	8.87424	8.27399	9.01055	9.29715	8.89743	6.78411	8.39921	7.83485	7.50428	8.76602	9.26305	9.25377	7.35558	8.73489	8.26448	8.44673	7.69525	7.22082	9.09678	8.79461	7.40252	9.28284	9.16368	9.03535	9.30878	8.99386	9.62471	9.23233	9.10835	8.93517
BRWD1	12.9273	12.4523	12.6957	12.7487	12.6246	12.4569	12.978	12.8844	12.8781	12.6801	12.9855	12.738	12.8585	12.8064	12.8233	13.0512	12.6837	12.9552	12.6358	12.5335	12.8458	12.9312	13.1208	12.8221	12.8884	12.81	12.8256	12.7539	12.6817	12.7059
BRWD1-IT2	6.30462	6.37605	6.35793	6.63984	5.95883	7.23823	6.37715	6.3	6.26013	7.03527	6.41618	6.38491	6.65272	5.88542	6.3725	6.00661	7.10806	6.66852	7.02175	6.89732	7.846	6.78846	6.78209	6.42882	6.8859	6.61904	6.76389	6.10478	6.63555	6.86561
BRWD3	11.2009	10.9167	11.1356	11.2338	11.1955	11.0255	11.4533	11.3741	11.3776	11.1658	11.3075	11.2307	11.4355	11.2129	11.3331	11.4641	11.0453	11.4229	11.1564	11.1891	11.2385	11.2459	11.3247	11.2253	11.2462	11.1893	11.0675	11.2676	10.9934	11.1724
BSCL2	5.71365	6.07279	5.94148	6.43954	5.83514	6.10478	6.02553	6.16951	5.49939	6.21137	6.20094	6.04323	5.71497	6.0045	6.01953	6.42447	6.70973	5.86365	6.52127	6.00132	6.37196	6.73114	6.55319	6.90853	7.09263	7.44776	7.00777	6.88213	6.75961	7.18469
BSDC1	12.1371	12.3097	12.2505	12.3148	12.2912	12.3412	12.466	12.3195	12.3157	12.3121	12.26	12.2523	12.4182	12.3184	12.2619	12.4336	12.2928	12.3059	12.3715	12.444	12.2763	12.229	12.4267	12.2371	12.4273	12.378	12.2153	12.2839	12.1598	12.2808
BSG	14.4643	14.8088	14.7563	14.7426	14.4491	14.5438	14.2579	14.2817	14.7563	14.6018	14.5593	14.6116	14.5717	14.5782	14.218	14.1246	14.7563	14.2984	14.2081	14.6681	14.2338	14.7154	14.3177	14.5042	14.7496	14.6178	14.7699	14.8017	14.6824	14.6399
BSN	9.72732	9.89294	10.2601	9.92644	9.97694	9.16959	9.78949	9.80397	9.5766	9.91774	10.0923	10.2916	9.23201	10.0024	9.66529	9.82726	9.48484	9.13913	10.0412	10.1183	9.3896	10.0801	9.89509	10.1672	9.92233	9.88112	9.88515	9.98473	9.9025	9.77368
BSND	8.92453	8.96088	9.02092	8.85183	8.22069	8.75143	8.67108	8.04319	8.91796	9.61579	8.93824	9.62973	7.15574	8.86169	7.97238	7.99381	10.0367	8.03514	8.16326	9.22441	8.55689	9.85151	9.96282	9.74523	9.5531	9.84396	9.77435	10.0267	10.0692	9.67969
BSPRY	9.83409	10.1404	9.71539	9.8406	9.92437	10.3135	10.258	10.0801	10.2484	10.0481	9.86786	10.2287	9.80846	9.58656	9.80429	9.72318	10.4768	10.1098	10.028	10.0647	10.2439	9.69297	10.0345	10.0391	9.92233	10.1065	10.1268	10.1607	10.155	9.68362
BST1	9.2696	9.2081	9.81348	9.07353	9.37244	9.79034	8.61604	8.91535	8.70466	8.7584	8.72136	9.04903	9.27566	9.21523	8.93667	9.03868	9.23389	9.61444	7.4988	8.91112	10.038	9.58725	9.37013	9.62899	9.79425	9.52377	9.30817	9.12823	9.63139	9.85482
BST2	10.9296	11.0173	10.792	10.9974	11.5257	11.5185	11.0243	12.4825	11.6041	11.0112	10.7676	10.9269	11.3148	11.6647	11.0229	11.3211	11.2317	12.0517	10.2593	10.9037	12.1961	10.8884	10.4784	10.3894	10.6391	10.3205	10.5086	10.4616	10.4959	10.3138
BTAF1	12.0484	11.8178	11.997	12.1468	12.2413	11.8449	12.2727	12.3848	12.2028	11.9097	11.9634	12.0869	12.3483	12.1981	12.2883	12.3458	11.7377	12.3171	11.8429	11.911	12.146	11.9645	11.9185	11.9659	11.8995	11.7387	11.9474	11.9827	11.8257	12.0558
BTBD1	11.081	10.9062	11.0922	10.747	10.6938	11.015	10.8188	10.5809	11.0044	11.0349	10.7596	10.8136	10.8902	10.7209	10.684	10.816	10.8299	11.0179	10.7869	10.795	10.9825	10.9367	11.1188	11.0006	11.0005	11.0108	11.0516	10.8868	11.0117	11.1789
BTBD10	10.0731	10.0042	9.87871	9.8738	10.1304	10.5172	10.1882	10.2424	10.32	9.98172	10.0759	9.8659	10.3817	9.91647	10.0975	10.2647	10.157	10.4484	10.2426	9.86232	10.7152	9.84592	10.0172	9.75363	9.83529	9.93467	9.77077	9.78669	9.76332	9.93845
BTBD11	9.37571	9.24809	9.7569	9.72198	9.25637	8.54461	9.03182	8.9518	9.18577	9.98725	9.31718	10.4695	8.81505	9.07008	9.22944	8.59087	9.89729	8.54684	9.29429	9.57183	8.62589	9.61176	10.2607	10.2812	10.2497	10.7666	10.2874	10.254	10.5926	10.2586
BTBD18	8.85964	8.65169	8.51802	8.48671	8.48379	8.24264	9.20684	8.38199	8.39711	8.30169	8.39237	8.78505	8.43753	8.74597	8.61005	9.00374	8.51169	8.08304	8.65323	8.64131	7.5373	7.83541	8.49777	8.29768	8.48095	8.34113	8.1148	8.90943	8.56253	8.66553
BTBD19	9.30925	9.92574	9.51196	9.46008	9.97341	9.02368	9.62699	9.3398	9.56822	9.89313	9.76451	9.54533	9.31661	9.8274	9.58263	9.76182	8.67343	8.92317	9.92341	9.66626	9.02353	9.25658	8.84872	9.53518	9.38755	9.81214	9.44361	9.57594	9.31735	10.6763
BTBD2	12.4945	12.584	12.5213	12.6097	12.6048	12.373	12.288	12.4686	12.3846	12.5335	12.4604	12.5225	12.2004	12.3548	12.4746	12.0811	12.5678	12.1801	12.3762	12.5484	12.1548	12.2413	12.2031	12.3324	12.3562	12.3921	12.5462	12.5957	12.5533	12.2625
BTBD3	10.8166	10.7029	10.9016	10.7696	10.7721	10.8998	10.7722	10.7008	10.9493	11.0469	10.9966	10.8468	10.6448	10.8378	10.7729	10.8492	10.941	10.8938	11.3691	10.7215	10.8027	10.9134	11.0128	10.7456	10.9001	11.0218	10.8124	10.8123	10.9298	10.7059
BTBD6	10.6953	10.8123	10.7293	10.7238	10.5683	11.0794	10.8354	11.2234	10.8704	10.7006	10.3976	10.7922	10.5809	10.5937	10.3892	10.5086	10.9373	10.9185	10.5965	10.6509	11.2007	10.3913	10.7754	10.8531	10.4905	10.5622	10.5961	10.6153	10.6365	10.8601
BTBD7	12.6094	12.3505	12.2255	12.3586	12.5266	12.6789	12.642	12.6215	12.7125	12.6642	12.6541	12.3445	12.7056	12.3501	12.559	12.7404	12.3984	12.5421	12.9636	12.5266	12.6094	12.0484	12.3064	12.0842	12.0376	12.0921	12.1379	12.007	12.0133	11.9932
BTBD8	6.60599	6.29519	6.68834	6.75961	6.53249	6.79477	6.89314	6.90011	6.90406	6.78592	7.06958	6.58129	6.35385	6.19453	6.41004	6.72866	6.5667	6.74893	6.92254	6.54226	7.38827	7.30047	7.24481	7.39592	7.13927	7.30127	7.18226	7.29941	7.06614	7.14813
BTBD9	11.7715	11.6885	11.6282	11.689	11.7922	11.4583	11.8944	11.8241	11.8138	11.8206	11.7738	11.7032	11.5668	11.6693	11.6345	11.7154	11.5999	11.5861	11.6509	11.8968	11.6925	11.6163	11.7337	11.731	11.7597	11.7301	11.7771	11.7922	11.7265	11.4382
BTBD9-AS1	6.86682	6.63219	7.15865	6.75961	6.81193	6.05871	6.94199	7.01144	6.78592	7.03527	7.15353	6.9005	6.79497	6.98091	6.79635	6.83932	7.09314	7.00932	6.93902	6.97671	7.83	7.41172	7.4044	7.44062	7.21047	7.04009	7.05364	6.90122	6.84426	7.02295
BTC	6.86682	6.85097	7.23823	6.74209	6.67335	7.19317	7.72103	6.44568	7.39723	7.56467	7.06958	6.97171	6.78372	6.69575	6.82765	7.0462	7.40015	7.17103	7.3128	7.16858	6.79186	7.80525	7.75999	7.61233	7.46721	7.73769	7.76358	7.19941	7.38827	7.64832
BTD	11.5458	11.645	12.1784	11.8896	11.3312	11.6597	11.0806	11.1358	11.5422	11.5644	11.7118	12.2363	11.7092	11.8268	11.1995	11.5155	12.4736	11.6074	11.1607	11.9457	11.9967	12.1189	12.3412	12.2845	12.0142	12.3226	12.1878	11.9538	12.1492	11.8786
BTF3	12.7155	12.4431	12.249	12.4428	12.6065	13.3062	12.4927	13.2542	12.9078	12.3967	12.5856	12.3173	12.9032	12.1371	12.8496	12.7338	12.9235	13.3992	12.7285	12.4187	13.5768	12.1292	12.3146	12.2534	12.2093	12.2549	12.1725	11.9312	11.9932	12.2006
BTF3L4	9.70531	9.69419	9.8054	9.61937	9.76261	9.98999	9.80606	9.93609	10.0288	9.96749	9.84787	9.7318	9.98778	9.73943	9.86946	10.0892	9.96635	9.85679	10.0229	9.59976	9.92456	10.0572	9.99323	9.88206	9.91339	9.74691	9.7679	10.0418	9.95701	10.0791
BTG1	11.8968	11.553	11.5683	11.8264	12.0198	12.0888	12.1881	12.3106	12.1101	11.5049	12.0682	11.4955	12.4532	11.9508	12.2573	12.1657	11.7825	12.4864	11.9167	11.7784	12.1839	11.6037	11.77	12.0664	12.055	11.83	11.8053	11.6745	11.4879	11.9236
BTG2	11.7988	11.852	11.3427	12.0091	12.0564	12.4244	12.1647	12.4669	12.1672	11.5396	12.738	11.2234	12.8334	12.028	12.3954	12.3135	11.5911	12.1657	11.7842	11.9885	11.6386	12.9622	12.9191	13.2699	13.6667	13.6761	12.7718	12.4943	12.95	14.3265
BTG3	8.52017	8.57836	8.31763	8.32367	8.81644	9.12178	8.60196	8.86169	8.82717	8.45253	8.53207	8.11398	8.86046	8.59443	8.44074	8.87369	8.8828	8.97614	8.84392	8.85797	8.82937	8.69625	8.68861	8.20457	9.015	8.40316	8.32445	9.02594	8.50093	9.33586
BTK	8.91654	8.81729	7.60136	9.03289	9.2918	9.03205	9.4357	10.0086	9.34635	8.00177	8.60561	7.8743	10.0798	9.42035	9.42352	9.56482	7.0317	9.41473	8.20442	8.63553	8.7765	6.93402	6.60827	7.42937	6.86561	6.49416	6.13104	7.36198	6.82522	7.44378
BTLA	7.22597	5.94519	5.80614	7.08824	6.67335	6.24211	6.26708	7.73175	6.62391	5.83293	6.73802	6.25796	7.79174	7.67542	7.22577	7.53624	4.87722	8.3889	5.0756	5.56592	6.62376	5.15699	5.45624	5.54957	5.27303	5.06252	5.28491	5.11764	5.03667	6.03049
BTN2A1	10.9123	10.8621	10.7312	10.8279	11.1621	10.7749	11.2843	11.1323	10.9719	10.7301	10.8285	10.6494	11.2695	11.1086	11.0372	11.0495	10.6448	10.9597	10.9039	10.8563	10.9067	10.5745	10.5344	10.6328	10.4881	10.4423	10.4169	10.6387	10.456	10.4782
BTN2A2	9.49736	10.0783	9.25104	9.8406	10.2035	10.0197	10.1164	10.5216	10.1158	9.54753	9.89045	9.54094	10.2226	9.93158	10.4148	10.1709	9.09956	10.1871	9.58513	9.77338	9.90314	8.91777	9.15489	9.23491	9.38436	9.5285	9.32271	9.52136	9.0702	9.40657
BTN2A3P	7.92482	8.63139	7.94424	8.16412	8.63128	8.50878	8.86013	8.49116	8.40972	8.34554	8.39711	8.0671	8.30812	8.24996	8.62636	8.50439	7.89136	7.89991	8.16833	7.56873	8.81908	7.63928	8.24699	6.88857	7.27045	7.73769	7.20161	7.84811	7.51461	7.51805
BTN3A1	11.0767	10.8339	10.5755	11.2449	11.6474	10.8819	11.9759	11.7109	11.0367	10.7279	11.0405	10.6582	11.5024	11.4981	11.5417	11.4758	10.3861	11.4752	10.6064	11.0224	10.9768	10.5943	10.4128	10.5136	10.4973	10.3577	10.3767	10.4653	10.2436	10.0904
BTN3A2	11.4374	11.1091	9.99549	11.3068	11.9478	11.2385	12.0272	11.9598	11.593	11.0477	11.2282	10.95	12.214	11.6144	11.7144	11.6927	10.8444	9.17419	10.1387	11.5145	11.1864	11.1198	10.7464	10.6657	10.5533	10.5912	10.6734	10.598	10.5042	9.97391
BTN3A3	10.6625	10.6477	10.4064	10.9394	11.282	10.6187	11.4285	11.3648	10.4845	10.137	10.7295	10.5661	11.385	11.1187	11.1529	11.0932	9.58333	11.1745	10.3298	10.4241	10.869	10.4332	10.405	10.1644	10.1307	10.3244	10.0435	10.3652	9.99687	9.92446
BTNL9	9.92322	10.7087	10.6517	9.9105	8.68529	8.8058	9.97694	8.2803	9.26072	9.95104	9.66515	10.3812	8.76314	10.375	9.3015	8.2694	8.96072	8.13893	9.39575	10.3095	9.04575	11.0555	9.37861	10.1764	9.86559	9.90264	9.91397	9.83509	10.0595	10.0247
BTRC	11.0628	10.9039	11.065	11.1253	10.9889	10.8171	11.0094	11.0347	11.1211	11.0915	11.1502	11.1471	11.099	11.083	11.0315	11.0379	11.2454	11.1211	11.1552	11.1045	10.9296	11.1654	11.3994	11.1677	11.1111	11.1658	11.2745	11.0446	11.0603	10.911
BUB1	6.51257	6.61858	4.61145	5.27906	6.89859	6.87983	7.29789	6.92757	7.0223	6.00042	5.98414	4.67932	6.72779	6.56872	7.37053	6.70973	5.24194	5.32814	6.9945	6.08876	6.79186	5.28535	4.71707	4.50339	4.08712	5.84066	4.63957	6.18839	6.2972	4.87722
BUB1B	6.44395	6.41831	5.45392	5.72556	6.67335	6.71156	6.94199	6.55748	6.50065	5.79192	6.10894	5.8747	6.75624	5.51476	7.1872	6.58835	5.99432	5.67585	6.92254	5.19745	6.66644	5.81794	5.93939	5.25204	6.45365	5.96115	5.88542	5.7197	6.16662	5.04993
BUB3	10.679	10.6202	10.655	10.6514	10.6908	10.8761	10.6114	10.8113	10.808	10.6638	10.7845	10.7213	10.9595	10.689	10.7424	10.7791	10.839	10.9414	10.605	10.7636	10.6873	10.8392	10.7703	10.6204	10.5863	10.6904	10.8011	10.491	10.698	10.5635
BUD13	9.78968	9.85785	9.56126	9.70021	9.85506	10.1562	10.1488	10.0418	10.0318	9.75376	9.81431	9.65663	10.0883	9.76628	9.9027	10.0983	10.1631	10.0794	9.99517	9.8242	10.0855	9.66817	9.7337	9.72173	9.59539	9.75823	9.60169	9.76529	9.5558	9.86218
BUD31	8.84889	8.92545	8.80735	8.82514	8.68974	9.74878	8.92944	9.34405	9.03917	8.96476	8.79634	8.8683	9.22887	8.47075	8.74454	8.73227	9.64312	9.53061	9.2346	8.96435	9.95193	8.54414	9.02997	8.90097	8.83013	9.05758	8.89469	8.69968	8.6808	9.08069
BVES	7.7789	6.74186	6.4944	6.92774	5.76193	6.62471	6.7735	6.4963	6.4178	7.07268	6.7167	6.78629	6.07366	6.14911	6.56099	6.60914	5.87001	6.21847	7.61939	5.84131	5.03667	6.53062	6.74492	6.48554	6.38491	6.49416	6.61183	6.3892	6.98465	5.2156
BYSL	9.16615	9.39853	8.85582	8.97202	9.26815	9.55079	9.29918	9.448	9.07232	9.20322	9.05552	8.81626	9.55525	9.43106	9.32291	9.2786	9.10797	9.24468	9.75063	9.13566	9.47876	8.4351	8.79018	8.44857	8.54989	8.64164	8.34192	8.7596	8.76855	8.84748
BZW1	11.5192	11.3834	11.4366	11.2532	11.31	11.7333	11.0702	11.282	11.7026	11.6271	11.5362	11.4287	11.5582	11.22	11.5264	11.5211	11.4886	11.7077	11.7656	11.2675	11.448	11.4708	11.4385	11.3168	11.1896	11.4384	11.3312	11.2364	11.355	11.8275
BZW2	9.90376	9.45435	9.17297	9.09771	9.60691	10.0157	9.61829	9.50199	9.65924	9.7388	9.74273	9.29085	9.61099	9.04665	9.74678	9.53636	9.46652	9.69954	10.4491	9.38242	9.92341	9.07685	9.42721	9.00351	9.08548	9.09819	9.22121	9.27074	9.32765	9.11212
C10orf10	11.597	11.5082	11.2297	10.995	11.6142	11.6515	11.244	11.779	11.0972	11.0857	11.6953	10.9548	11.5889	11.707	11.9601	11.9875	10.286	11.1851	11.9139	11.1772	11.3027	11.2341	10.7476	10.9712	12.1784	10.7613	11.2268	11.4871	11.2822	11.394
C10orf105	6.98192	6.95982	6.35793	6.89202	7.93151	6.47401	7.89928	8.28457	7.205	6.48078	6.62316	6.73605	6.58129	7.57854	7.58422	7.50206	5.0596	7.18186	6.4977	5.52265	7.26886	5.15699	5.45624	5.69287	5.39328	5.06252	5.45688	5.75794	5.58325	5.84043
C10orf107	4.42871	4.65824	5.36674	3.78899	4.27158	7.28902	4.93467	6.53579	6.64481	5.9195	4.62576	5.55668	5.48538	3.96924	6.05517	4.3963	6.76699	6.63899	5.4143	4.29012	6.96358	6.82451	6.70973	6.34693	5.61323	6.41722	5.8402	6.23861	5.16813	5.79529
C10orf11	9.82219	10.3257	10.0626	9.80143	9.95428	10.4126	9.56364	9.86516	10.099	9.72987	9.94895	10.0153	9.91007	9.80957	9.58263	9.86668	10.207	9.78103	9.22367	10.2513	10.5448	9.75554	10.2939	10.0437	9.7706	10.3577	10.1246	10.099	10.0068	10.2399
C10orf113	6.47806	4.95501	5.8761	6.15424	5.83514	5.69287	6.37715	4.73941	5.99789	6.97415	6.99777	6.54226	4.5403	5.65949	6.57982	6.19134	6.93694	5.93536	6.63846	5.52265	3.46031	7.35167	7.35504	6.66947	6.72476	7.34347	7.24353	6.55319	6.33309	7.28648
C10orf126	5.65738	5.44034	6.67058	5.80822	4.88362	6.3906	3.68552	4.85774	4.31828	5.54957	5.8754	6.64737	5.81496	4.27158	5.73197	3.92274	7.32496	6.01628	4.29012	6.23473	6.50673	7.28277	7.46059	7.69231	6.24036	7.0612	7.49407	6.40955	6.86804	7.12565
C10orf128	9.04925	9.28259	7.92045	8.90199	9.42249	9.44115	9.62501	10.1515	9.54006	8.08646	9.04448	8.28209	9.85565	8.79051	9.96749	9.56482	8.10627	9.39267	9.1051	9.35796	9.35769	7.17186	7.57607	7.42937	6.56853	7.20234	7.92768	7.58001	7.16978	7.16858
C10orf25	7.052	7.08193	7.57654	7.1181	7.08886	7.45582	6.71908	6.86226	7.24495	7.37294	7.32085	7.68765	7.36263	7.06901	7.00322	7.25251	7.78052	7.07398	7.03096	7.12371	7.77951	7.18537	7.65034	7.2315	6.97171	7.24661	7.24353	7.61172	7.25783	7.3024
C10orf35	7.2686	7.67081	7.22349	7.34386	7.54771	8.78017	6.8789	7.77187	7.97686	7.68057	7.53936	7.29109	7.52649	7.06901	7.3616	7.29731	7.90293	7.80467	8.02162	7.74243	8.67603	6.96085	7.27262	7.48199	7.43788	7.53276	7.16427	7.54489	7.44408	7.59064
C10orf55	4.9903	4.65824	4.47228	4.86343	4.81022	4.92757	5.88964	5.44643	4.48225	5.87001	5.5291	4.88606	3.26453	3.89754	5.84066	4.75499	5.30369	4.7195	4.97465	3.98663	4.65953	4.31828	4.26305	4.82335	5.44522	5.73481	6.06462	4.20448	5.6916	5.49529
C10orf62	8.67593	8.70247	9.14683	9.03289	8.54364	7.82729	7.79048	8.27531	7.96113	8.75526	8.72136	9.63853	7.99822	9.01296	8.18981	8.80973	8.80752	8.08987	8.33717	8.56758	8.64976	8.72449	8.94567	8.71216	8.91578	8.67772	9.22857	8.09221	8.63299	9.28214
C10orf67	7.73323	7.90052	8.55534	7.82046	6.82968	7.4188	6.56969	7.16858	7.1533	7.6284	7.53936	8.54768	7.99822	7.78845	6.94743	7.45005	8.93087	8.2512	6.95375	8.35594	8.82937	8.38049	8.69831	8.74382	8.25745	8.60181	8.7583	7.76227	8.87212	8.33649
C10orf71	10.8333	5.36274	5.77634	3.87915	4.00371	4.73941	4.09245	5.73635	4.40247	4.33365	6.05642	6.78629	4.18578	5.01058	4.18413	4.02987	5.20181	4.83694	2.97938	4.35131	5.51097	6.26359	4.61725	6.64737	5.20982	6.79813	5.61855	6.79353	5.79192	6.26767
C10orf76	11.1726	11.1082	11.2712	11.16	11.3024	11.1148	11.3849	11.3079	11.244	11.0972	11.323	11.1737	11.2089	11.2059	11.2136	11.4385	11.1245	11.1377	11.1264	11.191	11.1704	11.2327	11.428	11.2605	11.2148	11.1573	11.2219	11.0558	11.1294	10.995
C10orf82	4.11861	5.25981	5.1523	4.75603	4.60763	5.20982	5.94218	4.55192	4.67141	5.23907	5.8754	5.8747	4.35131	3.76738	4.93316	4.31694	6.65434	6.03812	5.6916	4.65217	6.20346	5.40755	6.03651	5.25204	5.07101	5.40646	5.70613	4.98946	5.73481	5.28491
C10orf88	8.28512	8.27915	8.2789	8.05192	8.2989	8.4423	8.06668	8.16924	8.27264	8.26363	8.32868	8.3651	8.38172	8.23526	8.08155	8.20635	8.38471	8.52943	8.33717	8.12921	8.22485	8.51169	8.3149	8.49777	8.39597	8.64783	8.49205	8.43287	8.50093	8.25518
C10orf95	6.73654	6.70761	6.91399	7.19554	6.88263	7.21047	7.06087	7.06302	6.44327	6.10478	5.73197	6.86682	6.52743	6.46882	6.47494	6.09884	6.84655	6.63899	7.20824	7.04647	6.15057	6.38754	6.2995	6.42882	6.6618	6.28765	6.82298	6.74119	7.00777	5.97996
C11orf1	8.79865	8.50334	9.25429	8.7473	8.63128	9.56161	8.37462	8.92986	8.8643	8.87156	8.68798	9.16253	8.8196	8.33567	8.3496	8.84001	10.099	9.34464	8.4446	8.94492	10.4949	9.15338	9.50381	9.6315	9.64287	9.55355	9.49285	9.05497	9.32047	9.53865
C11orf16	6.58362	5.72776	5.23349	5.09392	5.41845	5.93536	7.10476	5.89984	6.2275	6.54045	6.47438	5.98414	5.94728	5.91654	6.69075	5.55796	6.1194	5.64213	6.33375	6.15758	6.01362	6.13509	6.1093	4.3641	4.48404	5.96115	5.51347	5.85281	5.23721	5.04993
C11orf21	7.37683	8.34526	6.71908	8.22515	9.79425	8.08961	10.2684	9.01894	8.58947	7.84755	8.20575	7.0137	9.13792	8.89717	9.48989	9.18982	6.58079	9.02	8.49205	8.22664	7.24325	6.93402	6.36598	6.57767	6.72476	5.76536	6.19975	5.57356	5.93494	6.73716
C11orf24	9.99122	10.1365	10.0605	10.1488	10.1404	10.4365	9.71869	10.1451	9.91146	10.034	9.88804	9.97301	10.1015	10.1939	10.156	10.1075	10.1658	10.2048	10.1661	10.0677	9.96845	9.81481	9.69482	9.96509	9.87543	9.7227	10.0509	9.94613	10.1184	10.3228
C11orf42	7.14769	7.54338	7.87562	7.48952	7.69185	7.65845	7.83597	7.64792	7.49163	7.48451	6.81059	7.84089	7.82084	7.44492	7.22577	7.64275	8.33304	7.64792	7.15165	7.77406	7.89631	7.59469	7.94424	6.77211	6.52495	7.58097	7.20161	7.53422	7.74892	6.90884
C11orf45	7.73323	7.41675	7.08718	7.98944	7.58001	7.75989	8.97614	7.98743	7.90293	7.60312	7.78254	7.30333	7.68949	7.74036	8.57638	8.19025	7.54192	7.79754	7.97776	7.68114	7.23085	7.42386	7.09729	7.1533	6.72476	7.08292	7.24353	6.75696	6.94403	7.2555
C11orf49	10.8953	11.0595	10.7539	10.8079	11.0835	11.2085	10.9174	11.0065	11.0956	10.8744	11.0306	10.8791	10.8102	10.7782	10.9722	10.931	11.1391	10.9453	11.1524	10.9547	11.1896	10.8413	10.8321	10.1035	10.8853	10.9304	10.9686	10.9409	11.0239	10.717
C11orf54	13.0522	12.7957	13.5221	12.9983	12.2063	13.2529	12.228	12.0731	12.9018	13.4686	12.8623	14.0679	13.3525	13.6206	12.4674	12.8853	13.9079	13.1337	12.1081	13.2728	13.4714	14.1365	14.254	14.1806	13.9402	14.1879	14.0884	13.4073	13.9002	14.1576
C11orf57	10.4643	10.2328	10.4537	10.3145	10.1404	10.6581	9.87213	10.4252	10.4597	10.2659	10.3321	10.4554	10.5542	10.2542	10.2901	10.4453	10.6314	10.4606	10.4491	10.2888	10.4499	10.3115	10.4522	10.3257	10.2497	10.3306	10.2487	10.1344	10.1695	10.1042
C11orf58	11.3013	11.2203	11.3809	11.2931	11.1403	11.6875	11.1778	11.5795	11.5779	11.2762	11.2735	11.3501	11.7118	11.1422	11.3275	11.356	11.611	11.7283	11.4242	11.171	11.5421	11.4688	11.3576	11.4136	11.3278	11.4219	11.4433	11.2485	11.2671	11.4462
C11orf63	9.50113	9.41808	9.7569	9.92437	9.57304	9.76692	9.41473	9.43391	9.51482	9.79051	9.61778	9.98007	9.76733	9.395	9.5669	9.61666	10.3836	9.79565	9.37876	9.83777	10.0118	10.0041	10.224	10.01	9.63726	10.0063	10.2261	9.69855	10.0772	9.91859
C11orf65	6.19627	6.21811	6.71908	6.52584	6.60356	6.30705	6.8789	6.53579	6.74742	6.78592	6.81059	6.86682	6.58129	6.72133	6.41004	6.70973	7.08094	6.76352	6.33375	6.15758	5.88734	7.54511	7.60892	7.18537	7.42563	7.40811	7.52233	6.88213	7.61939	6.84317
C11orf68	10.5327	10.6336	10.5095	10.4512	10.8948	11.1922	10.6065	10.9425	10.8473	10.5087	10.4893	10.46	10.7423	10.5411	10.6387	10.598	10.826	10.9171	10.372	10.6492	11.2161	10.3027	10.2332	10.2455	10.4024	10.3436	10.3467	10.46	10.4845	10.3303
C11orf71	8.72449	8.91777	9.48748	9.15118	8.71609	9.24425	8.20468	8.43664	9.01906	8.85258	8.62786	9.00993	9.00209	8.41994	8.39746	8.77663	9.70408	9.32583	8.53085	9.05598	9.80502	9.3453	9.31417	9.5783	9.5531	9.56473	9.56962	9.58348	9.52075	9.37709
C11orf74	8.14567	8.10925	8.25807	8.32367	8.03225	8.95559	8.32212	8.44099	8.82338	8.25726	8.12179	8.19937	8.61902	7.65226	8.21156	8.14612	8.96072	8.97614	8.2942	8.29984	9.53263	8.29623	8.56814	8.54607	8.47412	8.52808	8.57502	8.24391	8.1608	8.4179
C11orf80	10.4995	10.397	9.96831	10.4548	10.6704	10.6521	11.2066	10.4908	10.6227	10.7626	10.8123	10.3411	10.433	10.4666	10.783	10.7845	10.2697	10.4337	10.7412	10.5584	10.1653	10.2915	10.1253	9.52967	9.98439	10.1912	9.9943	10.1762	10.2713	9.96627
C11orf84	9.28619	9.60887	9.32342	9.40189	9.56477	9.55079	9.81808	9.91489	9.6132	9.58137	9.46173	9.36179	9.82096	9.75819	9.48373	9.42081	9.28824	9.45784	9.83735	9.69537	9.69973	9.15028	9.0274	9.28484	9.40238	9.01974	9.20859	9.40095	9.22441	9.76261
C11orf87	4.53486	2.77786	7.47511	3.1971	3.1786	2.15825	0.788928	2.01244	0.539065	0.397764	2.84026	4.88606	2.99865	4.12366	1.8757	3.81645	5.49529	3.92274	1.3652	2.69459	5.60995	6.53062	7.6722	6.32245	5.69762	5.65243	6.38549	4.98946	6.20094	5.88469
C11orf95	11.4264	11.5929	11.5164	11.6317	11.6599	11.0669	11.4636	11.5547	11.5317	11.5631	11.4532	11.6528	11.4314	11.726	11.2561	11.2475	11.513	11.1458	11.3863	11.5112	11.0154	11.4747	11.2113	11.3907	11.2588	11.3036	11.3707	11.4244	11.453	11.2173
C11orf96	10.1908	10.551	9.41567	10.267	11.0447	11.2753	9.496	11.1955	10.2042	10.7306	10.1261	8.96121	10.2837	10.1703	10.6907	10.7111	9.31587	10.3069	11.8567	10.3168	10.4961	10.2391	9.67581	11.0442	11.6673	10.7893	10.9062	11.0671	10.6694	11.7191
C12orf10	10.3443	10.5399	10.4423	10.422	10.5141	11.2718	10.4848	10.7569	10.5442	10.4727	10.2542	10.5531	10.7362	10.3789	10.3025	10.3649	11.1239	11.1017	10.4713	10.6312	11.6014	10.4459	10.4259	10.5635	10.5048	10.5958	10.5935	10.3652	10.4649	10.3465
C12orf29	8.25704	8.39782	8.59815	8.21129	7.82268	8.63752	8.06668	7.93493	8.18745	8.47695	8.01723	8.41024	8.52114	8.08948	7.69769	7.95568	8.68711	8.48648	8.31664	8.16862	8.50837	8.4045	8.769	8.76361	8.63112	8.73707	8.63336	8.29203	8.59119	8.66553
C12orf4	9.33363	9.29286	9.45319	9.52075	9.27579	9.15678	8.91286	9.28259	9.43692	9.46677	9.50277	9.27306	9.45203	9.33964	9.5362	9.63759	9.04073	9.34789	9.60349	9.17404	9.07734	9.45654	9.14334	9.14415	8.9596	9.24584	9.23491	9.12193	9.26612	9.18577
C12orf42	4.85774	3.63323	2.43619	4.40819	4.67141	3.36555	5.41845	5.77059	4.9853	2.53374	3.7857	4.44929	5.7831	4.27158	4.38513	4.91423	2.93264	7.18186	1.91156	4.13183	2.01244	3.26121	0.419361	4.00371	0.404163	4.16013	1.61608	2.97938	3.86436	4.63347
C12orf43	9.35769	9.55144	9.62046	9.43838	9.38325	9.81214	9.34405	9.36141	9.42577	9.40752	9.52159	9.6132	9.44121	9.33225	9.36058	9.2786	9.66727	9.5174	9.43317	9.37499	9.25535	9.3154	9.31756	9.18891	9.15156	9.51771	9.27348	9.35338	9.49264	9.24247
C12orf45	7.01658	6.97477	7.17699	7.05926	7.76227	8.39831	7.37551	8.36802	7.6524	7.41518	7.45764	6.97171	8.23879	7.45847	7.20116	7.60097	7.2686	8.11624	7.73175	7.48952	8.41253	7.1979	7.09729	7.10776	7.29731	6.8859	6.82298	6.93532	6.86804	7.42834
C12orf49	11.9657	12.12	11.4446	11.6879	11.8632	12.1253	11.7331	11.9754	12.1159	12.2497	11.8645	11.5749	11.6781	11.4228	11.8097	11.7833	11.8843	11.8512	12.3643	11.9236	11.9784	11.5265	11.5792	11.369	11.48	11.6745	11.6166	11.5697	11.5563	11.5856
C12orf57	11.1007	10.8722	10.5279	10.8988	11.2701	12.017	11.0077	11.8256	11.414	10.7649	10.8033	10.5995	11.3915	10.6795	10.9744	10.6747	11.3071	12.0123	10.8302	10.7441	12.4711	10.1666	10.2348	10.4472	10.4424	10.2417	10.3611	10.491	10.4999	10.2463
C12orf60	5.71365	5.80094	5.6082	5.50878	5.63388	5.9093	4.9903	5.27493	6.1625	5.48205	5.5291	6.19279	5.68455	5.55732	4.73022	5.36274	7.04383	5.98376	5.73327	4.84724	7.25783	6.46984	6.63377	6.02503	6.68212	6.44791	6.3285	5.92298	6.33309	5.88469
C12orf65	9.04354	9.01125	9.00642	8.99452	9.10687	9.38436	9.0215	9.30476	8.87688	9.1046	9.05238	9.27592	9.3752	9.12719	9.15145	9.24176	9.43505	9.38286	9.09678	9.06745	8.87077	8.82937	9.004	9.0289	8.94795	9.02997	8.88955	9.17054	8.8536	8.92403
C12orf66	8.90097	8.69823	9.12539	8.87982	8.92571	9.36372	8.67108	8.88679	8.73948	9.00925	8.89651	9.13434	8.9247	8.97284	8.77804	8.65688	9.57644	9.26294	8.98256	9.05598	9.61948	9.3154	9.74499	9.56748	9.64798	9.61564	9.51465	9.38481	9.68561	9.33948
C12orf73	7.58001	7.87421	8.15144	7.85806	7.99982	8.33441	7.89928	8.27531	8.19937	8.01784	8.11545	7.99504	8.36668	7.73499	7.78254	8.08088	8.71206	8.36386	7.87102	8.01909	8.44868	7.77046	7.77063	7.84579	7.866	7.98693	7.55415	7.89554	7.96008	7.88165
C12orf75	11.0054	10.973	10.7029	10.8423	11.3343	11.8408	10.5722	11.623	11.5612	11.7032	10.9465	10.7594	11.2241	10.7493	11.033	10.9865	11.0875	11.3562	11.6323	11.0233	12.1402	10.6949	10.6414	10.5473	10.8389	10.8605	10.4829	10.9277	10.74	10.9379
C12orf76	8.04044	7.79306	8.25096	7.9145	8.13398	8.32601	8.04185	8.14612	7.88979	7.84755	8.29134	7.89136	8.36169	8.12692	8.00099	8.04304	8.41941	8.66013	8.04073	8.33441	8.68122	7.91673	7.54967	7.93209	7.9693	8.00467	8.19527	7.85461	7.40061	6.9534
C14orf1	10.2659	10.2583	10.1951	10.2379	10.2942	10.8939	9.9329	10.2891	10.531	10.3093	10.2457	10.2076	10.3634	10.053	10.1627	10.1959	10.862	10.6967	10.028	10.3398	10.8656	10.1012	10.3775	10.2945	10.1442	10.3171	10.359	10.2438	10.3	10.3179
C14orf105	12.7421	12.5706	12.627	12.7188	12.6297	12.6752	12.4063	12.4864	12.7921	13.0369	12.9151	12.6976	12.5953	12.2497	12.5494	12.3334	12.9093	12.3643	12.6698	12.5943	12.9631	12.6916	12.8712	12.5788	12.5487	12.9203	12.757	12.2264	12.6069	12.7027
C14orf119	10.1042	10.0783	10.0174	9.82707	10.0365	10.4842	9.63285	10.172	10.3135	10.0977	9.87114	9.82726	10.1122	9.92456	10.0375	10.1709	10.3982	10.2502	10.3286	10.0376	10.6403	9.77708	10.0172	9.97797	9.89249	9.85759	9.67369	9.80772	9.82707	10.0551
[truncated: 15,562 more rows]

## Sheet: Table S2  matrix of GSE30528
	DN group	DN group	DN group	DN group	DN group	DN group	DN group	DN group	DN group	Control group	Control group	Control group	Control group	Control group	Control group	Control group	Control group	Control group	Control group	Control group	Control group	Control group
[truncated: 12,540 more rows]

[truncated: 8 more sheets: Table S3  PRGs, Table S4   FRGs, Table S5  DEGs in GSE142025, Table S6  GO KEGG results , Table S7  GSEA results, Table S8   immune infiltration , Table S9  correlation analysis, Sheet2]
